# Supplementary material
Source: ML conference proceedings conference paper supplement (https://openreview.net/forum?id=dS3wVICQrU0)

T-Shirt/Top

Trouser

Pullover

Dress

Coat

Sandal

Shirt

Sneaker

Bag

Ankle Boot

Parameter  $\theta$ 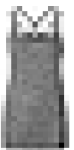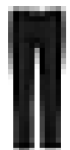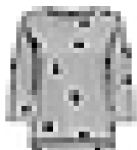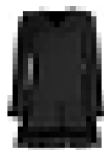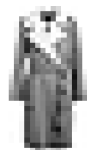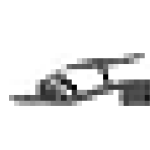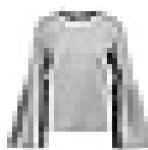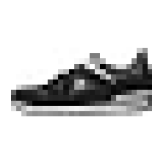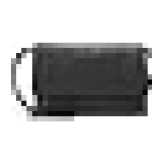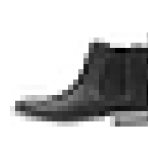Observation  $x$ 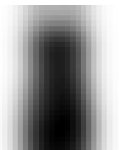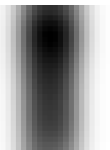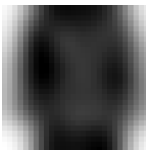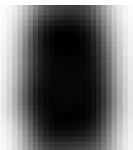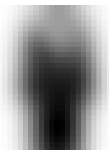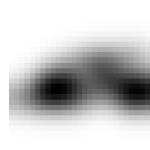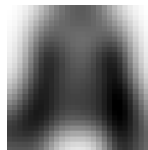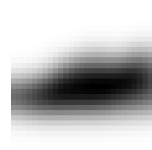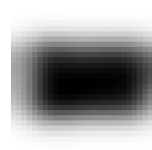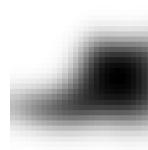

Mean

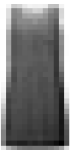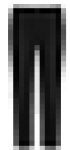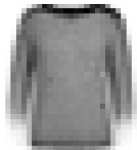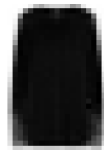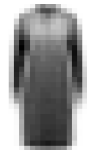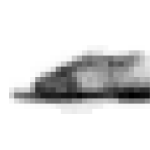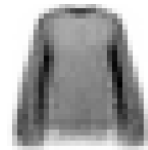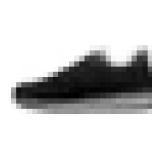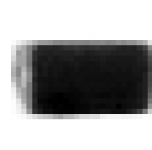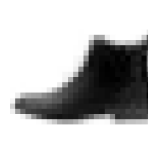

Std.Dev

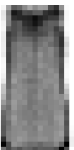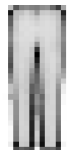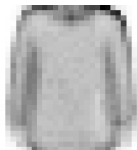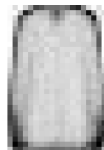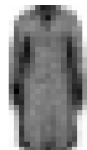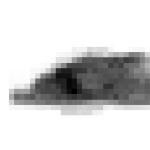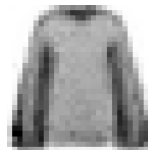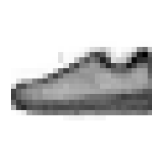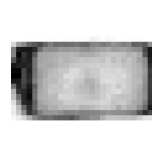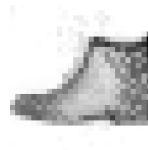

Supplement: supplementary_material [file attachment]
