# Supplementary material
Source: ML conference proceedings conference paper supplement (https://openreview.net/forum?id=dS3wVICQrU0)
Supplement: supplementary_material [file attachment]

|             | Ground truth $\theta^*$                                                             | Data $x$                                                                            | Sample #1                                                                           | Sample #2                                                                           | Sample #3                                                                            | Sample #4                                                                             | Sample #5                                                                             | Sample #6                                                                             | Sample #7                                                                             | Sample #8                                                                             | Sample #9                                                                             | Sample #10                                                                            | Sample #11                                                                            | Sample #12                                                                            | Sample #13                                                                            | Sample #14                                                                            | Sample #15                                                                            |
|-------------|-------------------------------------------------------------------------------------|-------------------------------------------------------------------------------------|-------------------------------------------------------------------------------------|-------------------------------------------------------------------------------------|--------------------------------------------------------------------------------------|---------------------------------------------------------------------------------------|---------------------------------------------------------------------------------------|---------------------------------------------------------------------------------------|---------------------------------------------------------------------------------------|---------------------------------------------------------------------------------------|---------------------------------------------------------------------------------------|---------------------------------------------------------------------------------------|---------------------------------------------------------------------------------------|---------------------------------------------------------------------------------------|---------------------------------------------------------------------------------------|---------------------------------------------------------------------------------------|---------------------------------------------------------------------------------------|
| T-Shirt/Top |     |     |     |     |     |     |     |     |     |     |     |     |     |     |     |     |     |
| Trouser     |    |    |    |    |    |    |    |    |    |    |    |    |    |    |    |    |    |
| Pullover    |    |    |    |    |    |    |    |    |    |    |    |    |    |    |    |    |    |
| Dress       |    |    |    |    |    |    |    |    |    |    |    |    |    |    |    |    |    |
| Coat        |    |    |    |    |    |    |    |    |    |    |    |    |    |    |    |    |    |
| Sandal      |   |   |   |   |   |   |   |   |   |   |   |   |   |   |   |   |   |
| Shirt       |  |  |  |  |  |  |  |  |  |  |  |  |  |  |  |  |  |
| Sneaker     |  |  |  |  |  |  |  |  |  |  |  |  |  |  |  |  |  |
| Bag         |  |  |  |  |  |  |  |  |  |  |  |  |  |  |  |  |  |
| Ankle Boot  |  |  |  |  |  |  |  |  |  |  |  |  |  |  |  |  |  |
