# Supplementary material (part 1 of 2)
Source: ML conference proceedings conference paper supplement (https://openreview.net/forum?id=dS3wVICQrU0)

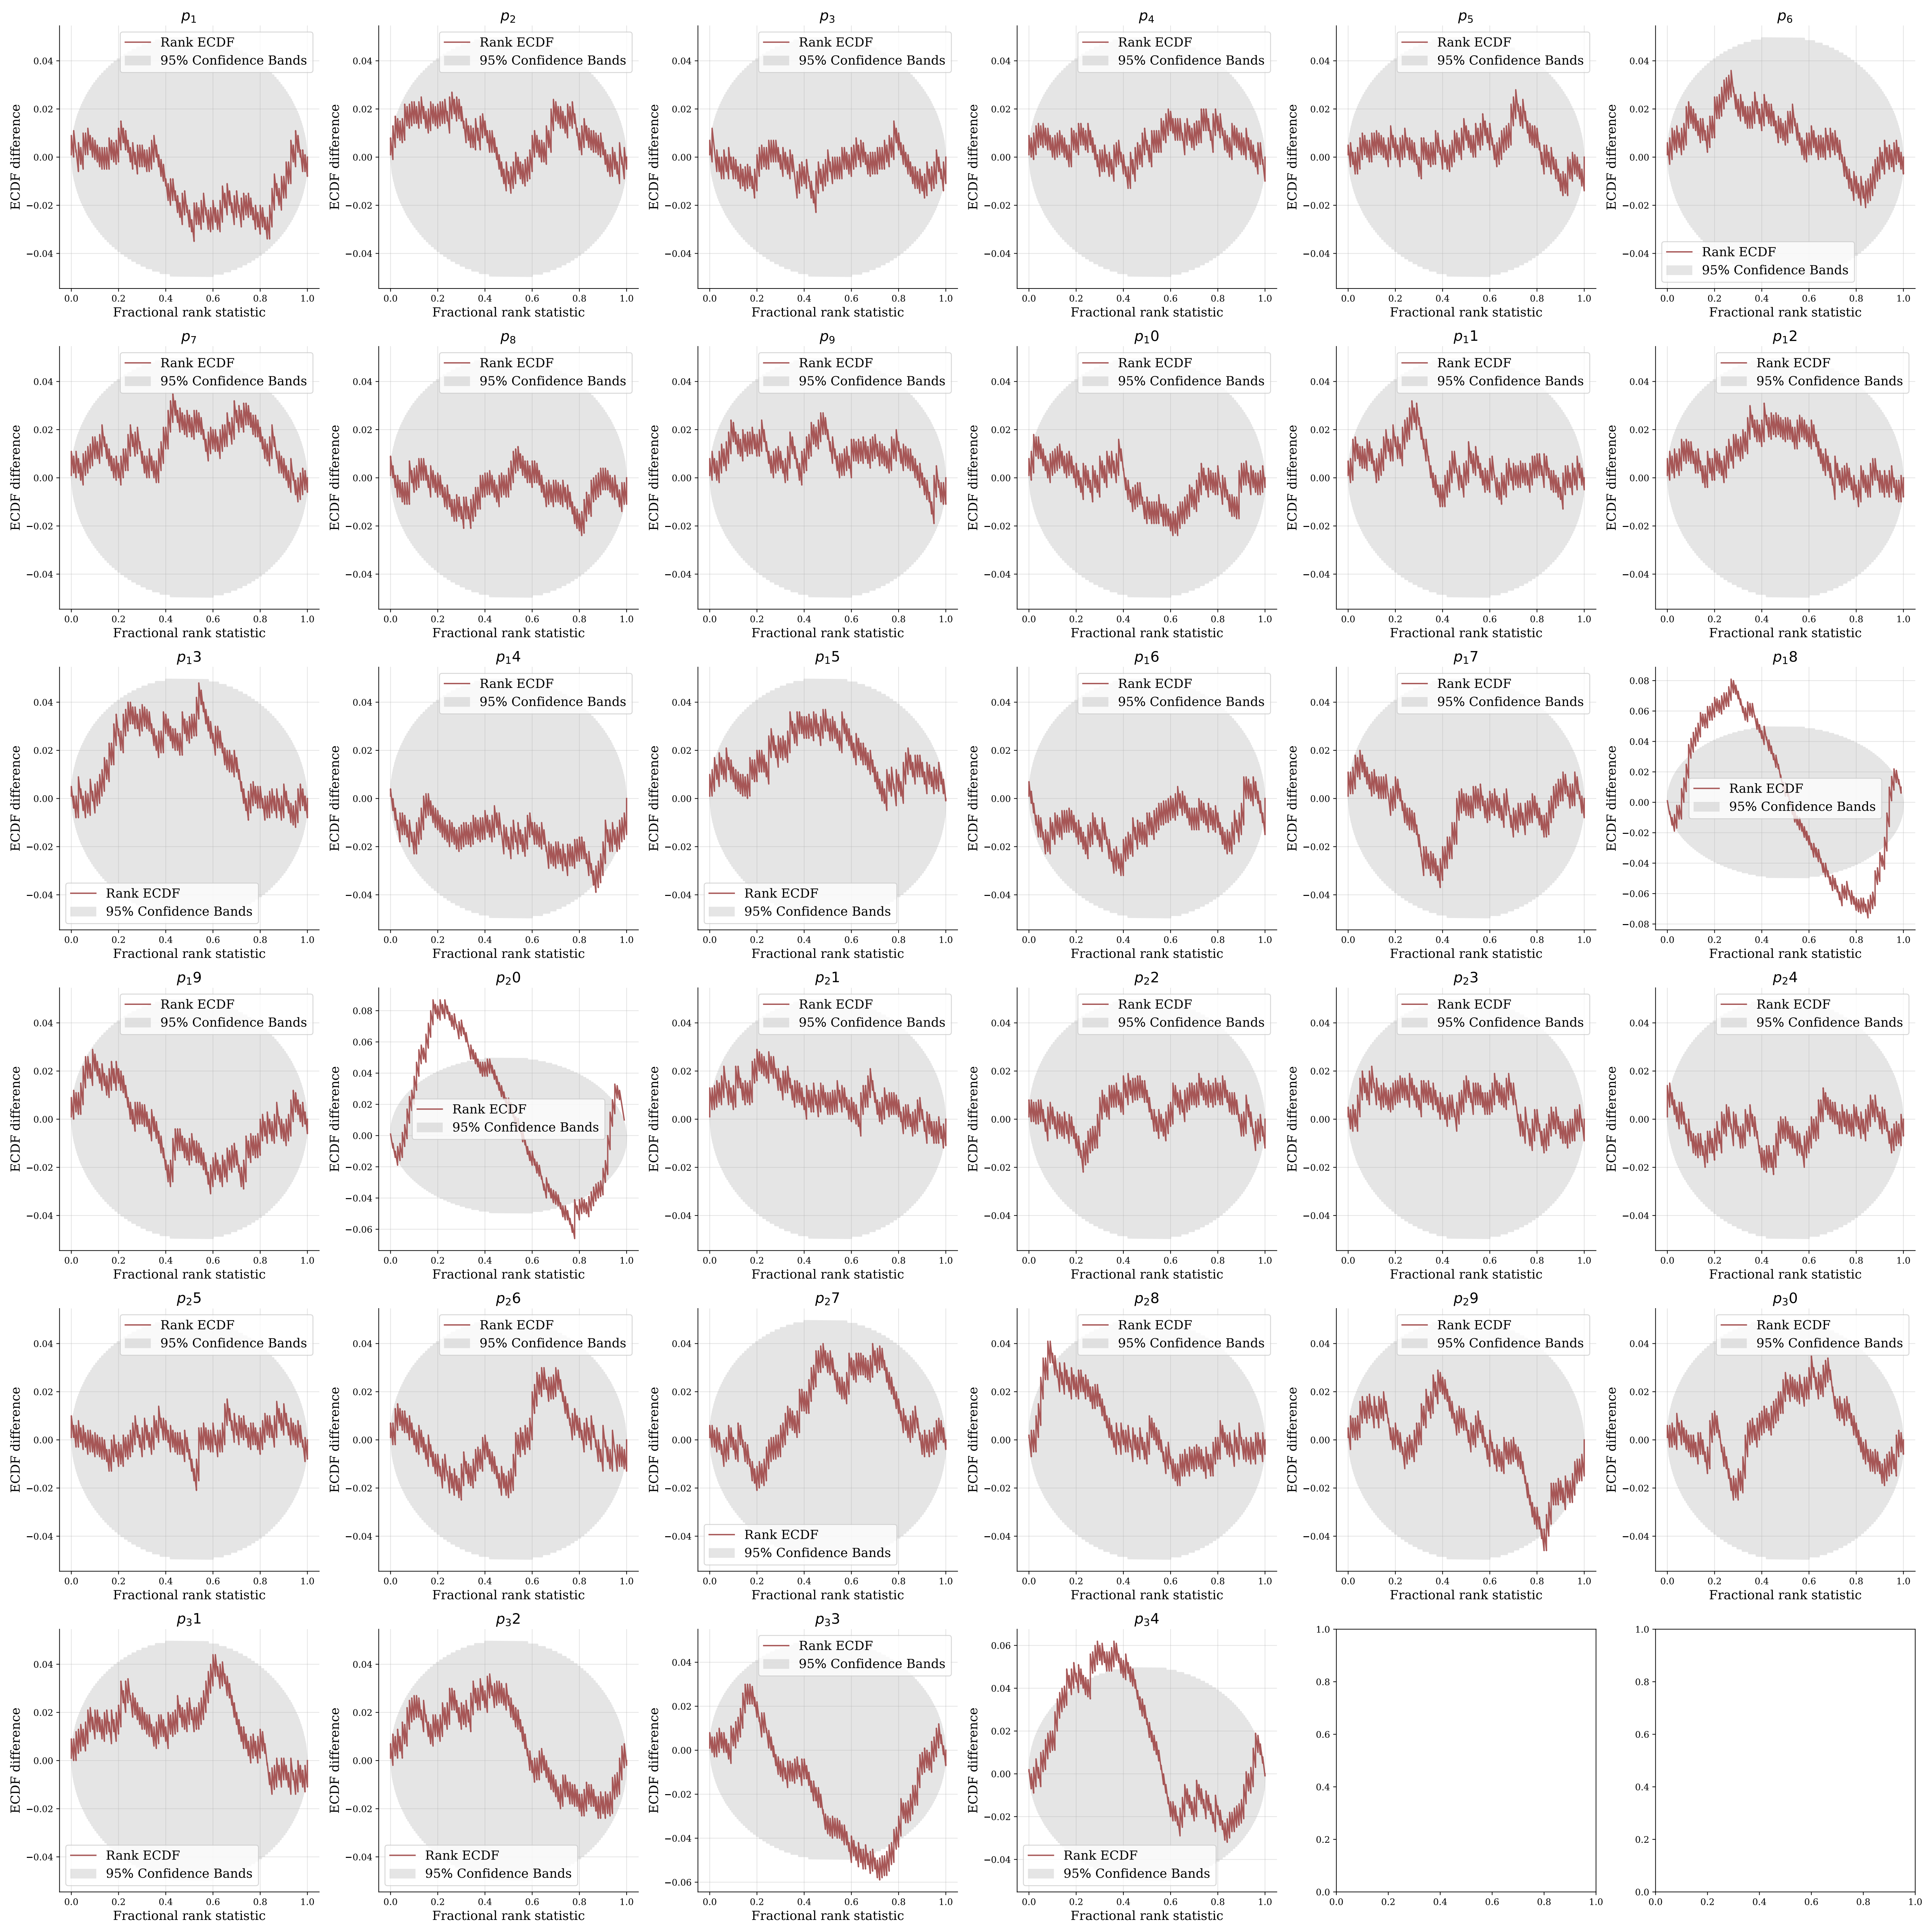

Supplement: supplementary_material [file attachment]

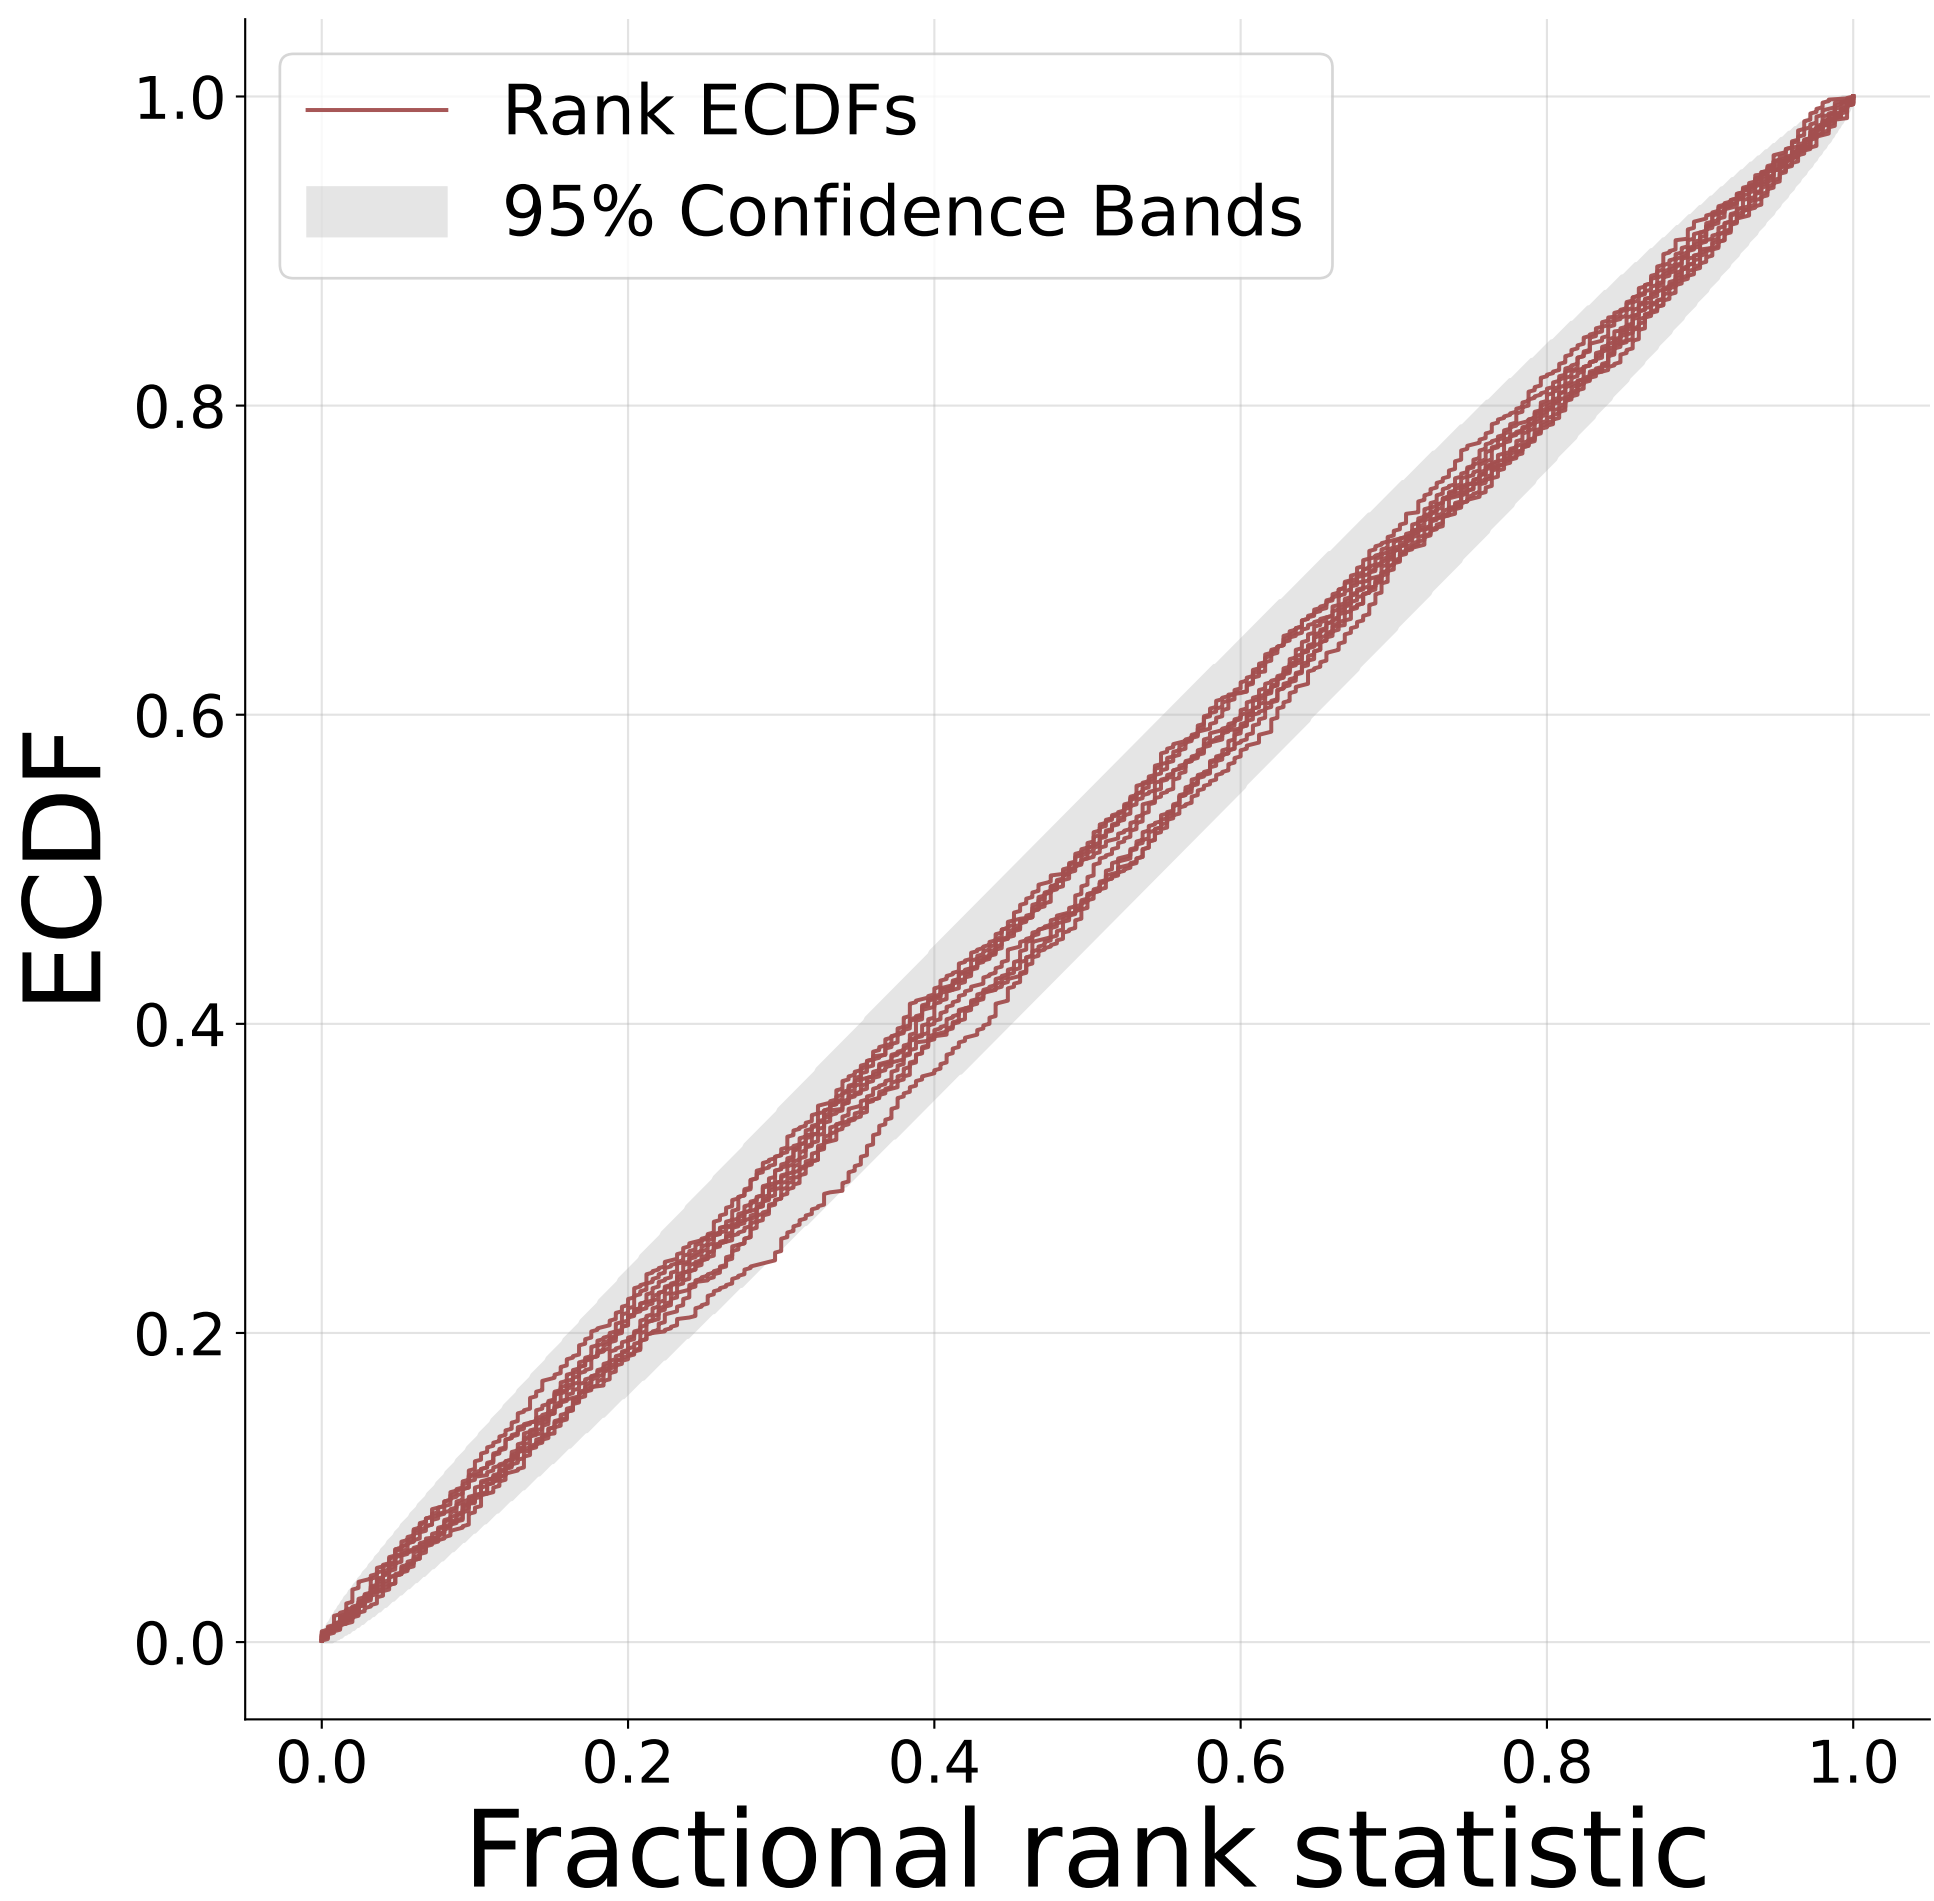

Supplement: supplementary_material [file attachment]

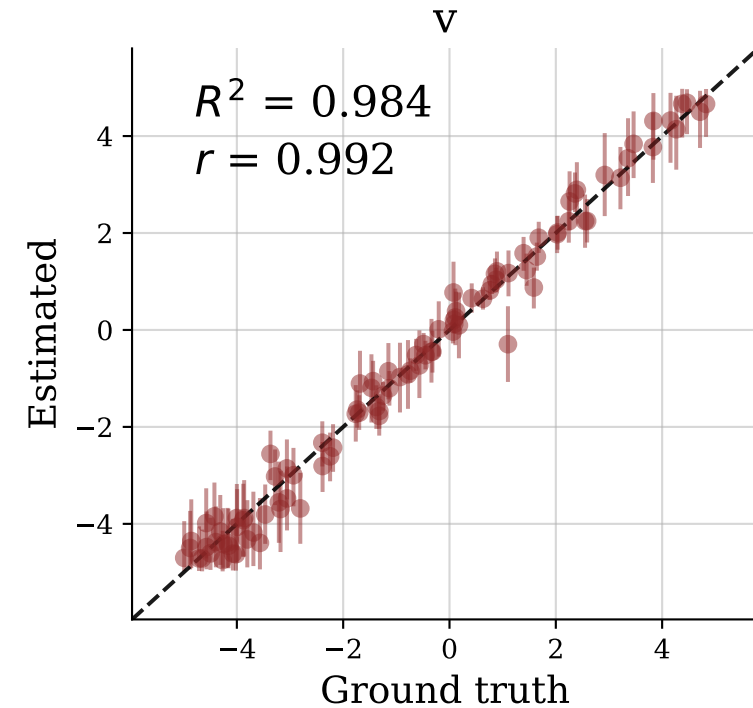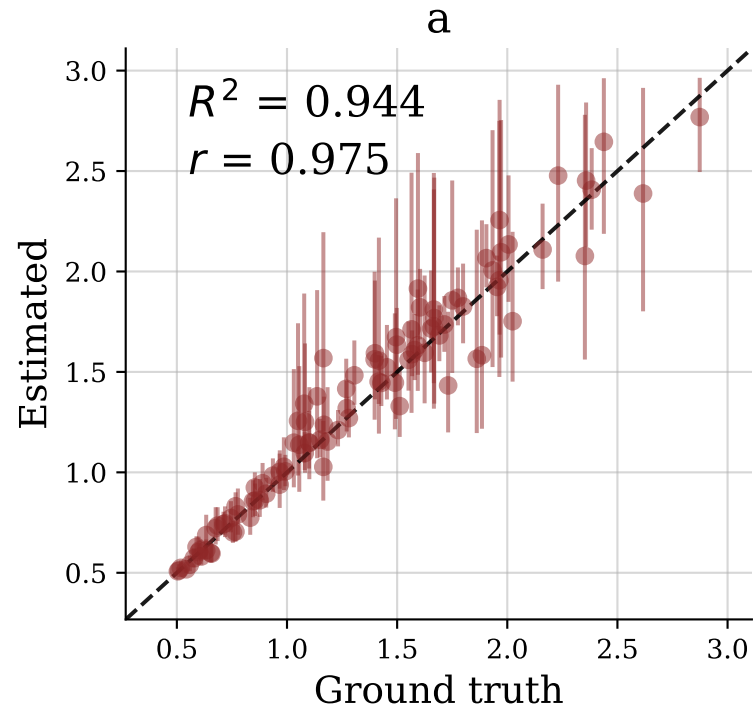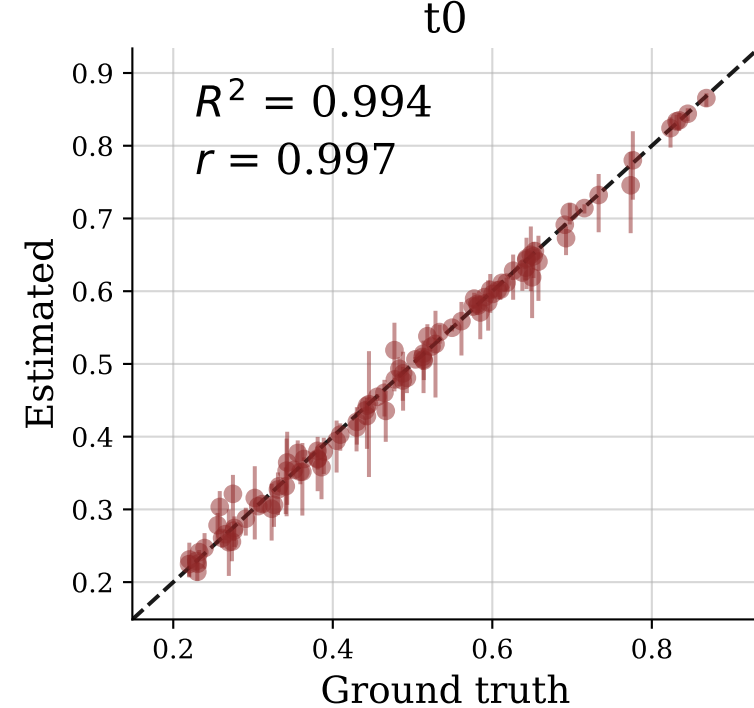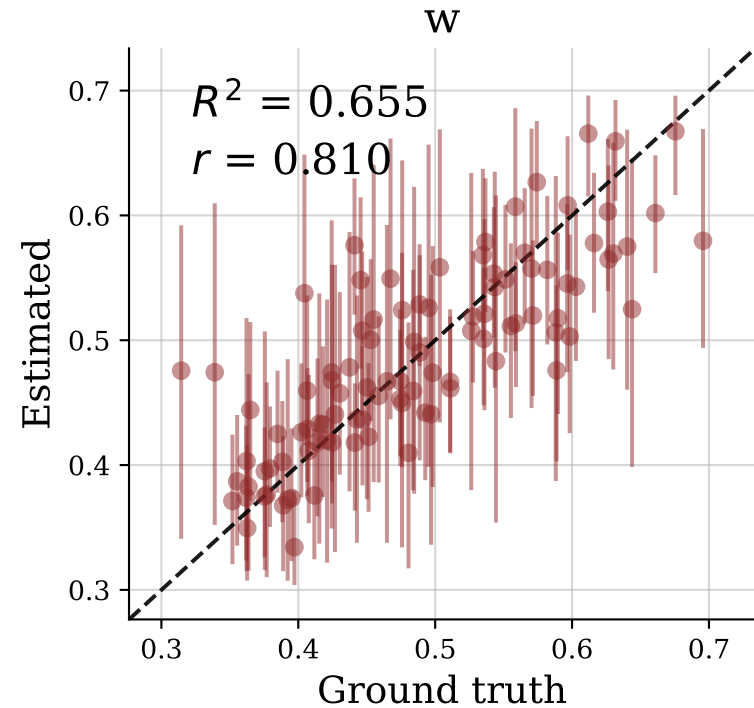

Supplement: supplementary_material [file attachment]

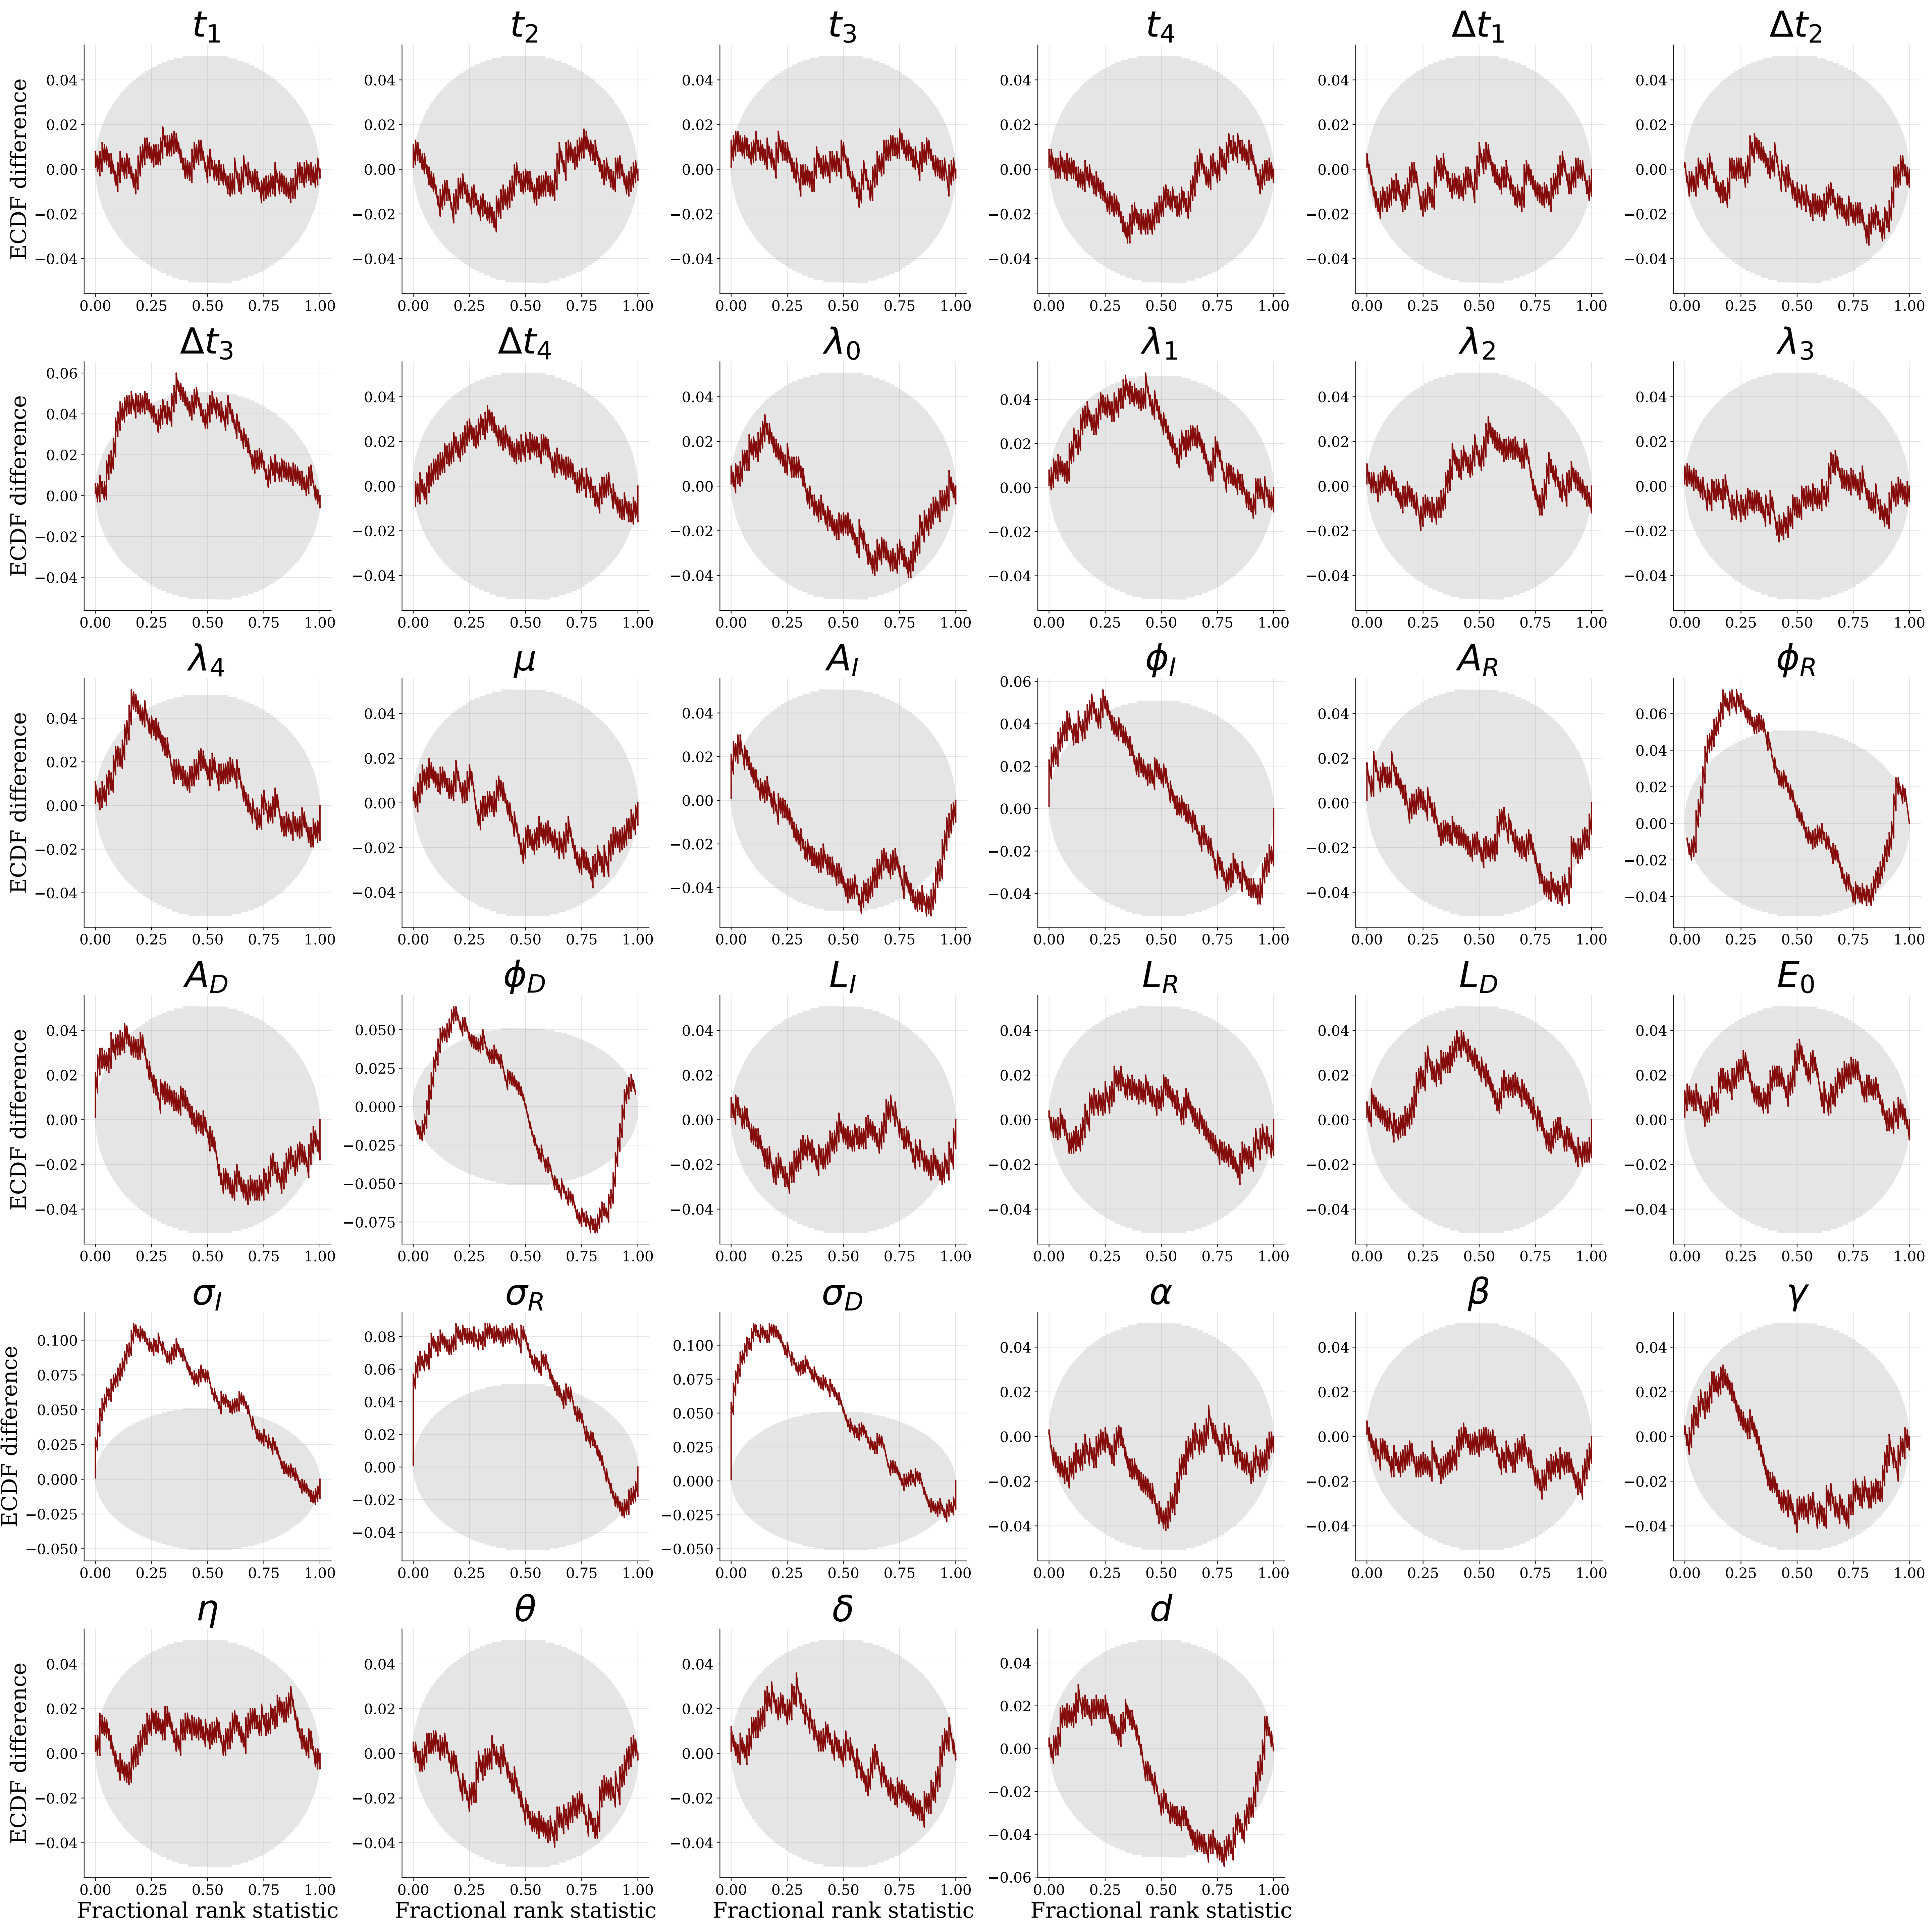

Supplement: supplementary_material [file attachment]

ECDF difference

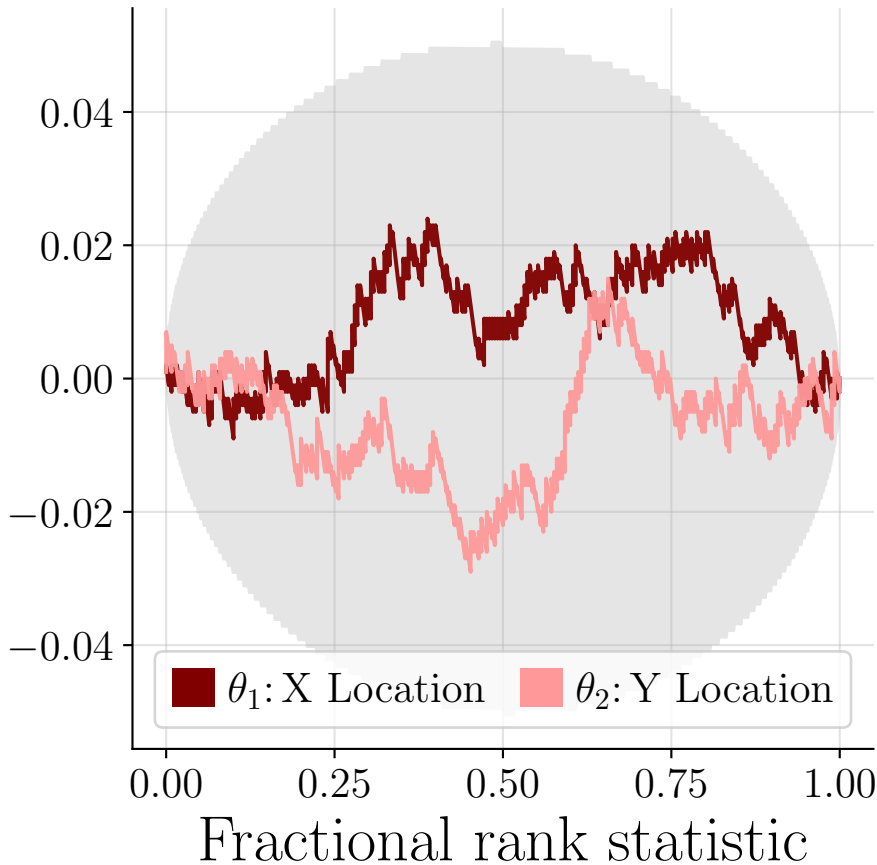

Supplement: supplementary_material [file attachment]

BayesFlow

v

$R^2 = 0.999$   
 $r = 0.999$

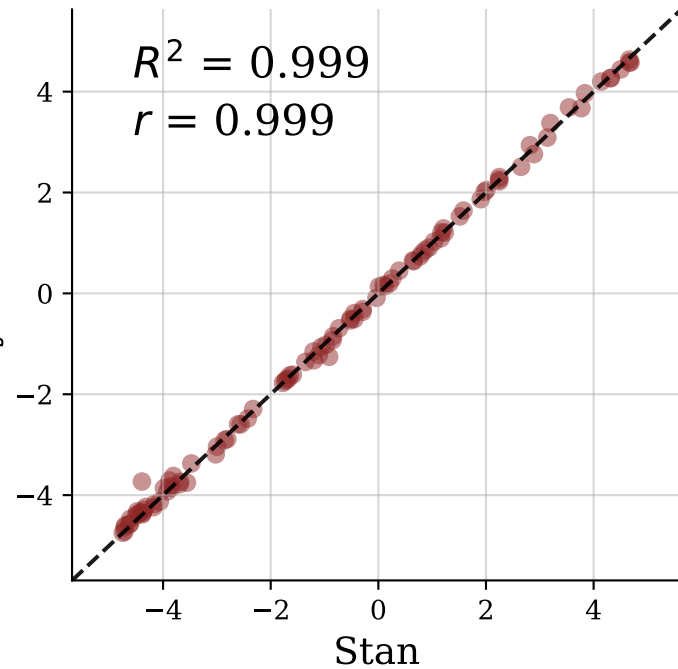

a

$R^2 = 0.997$   
 $r = 0.998$

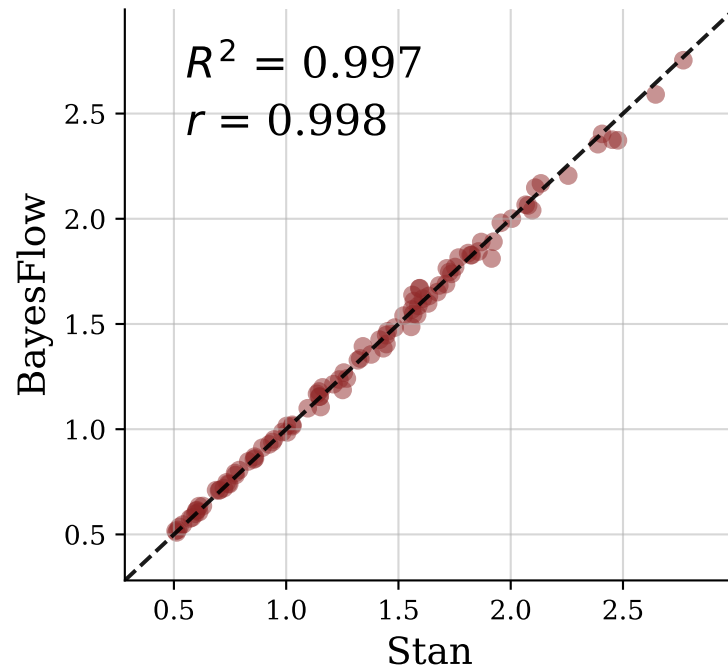

t0

$R^2 = 1.000$   
 $r = 1.000$

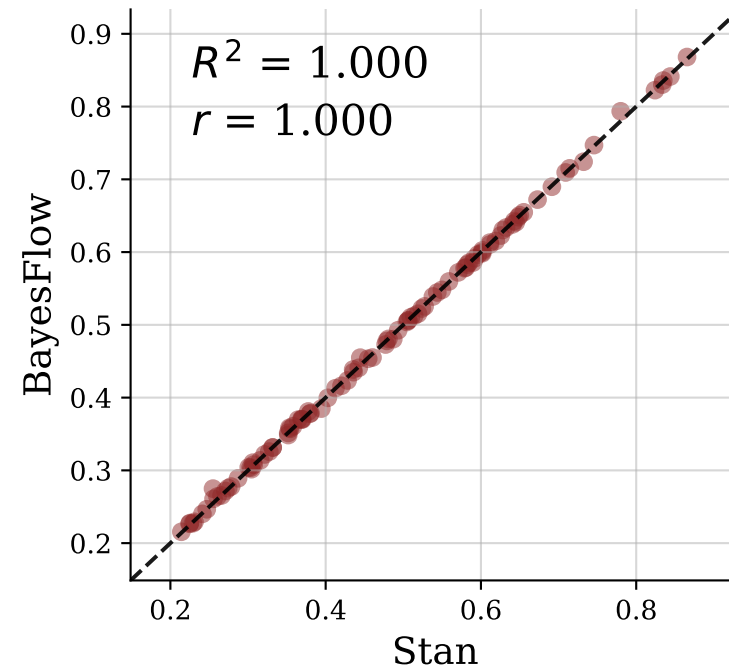

w

$R^2 = 0.977$   
 $r = 0.989$

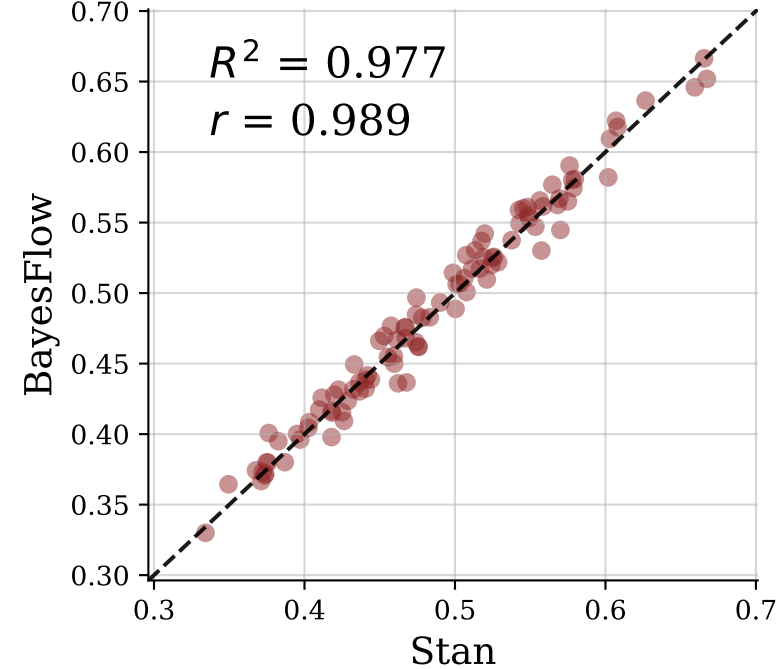

Supplement: supplementary_material [file attachment]

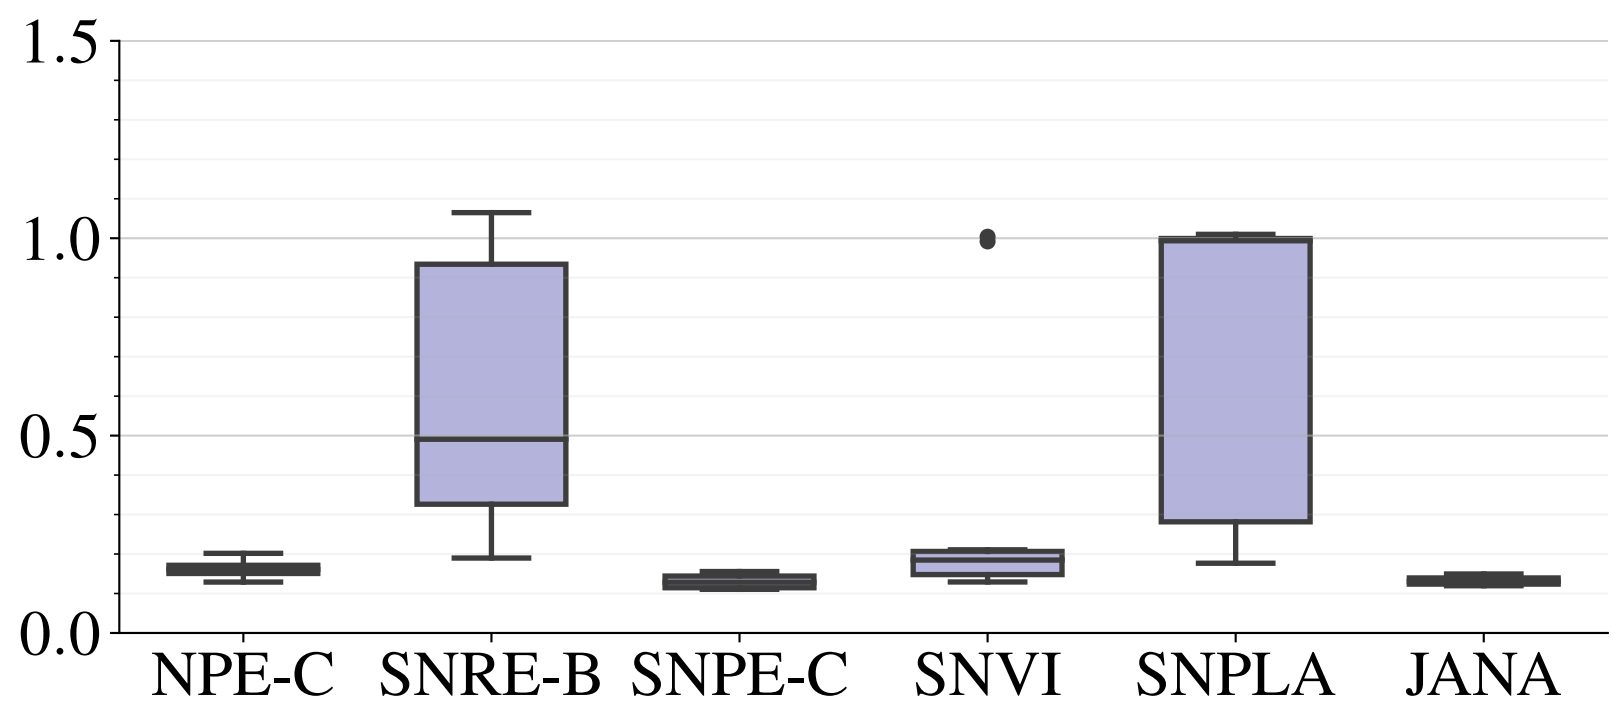

Supplement: supplementary_material [file attachment]

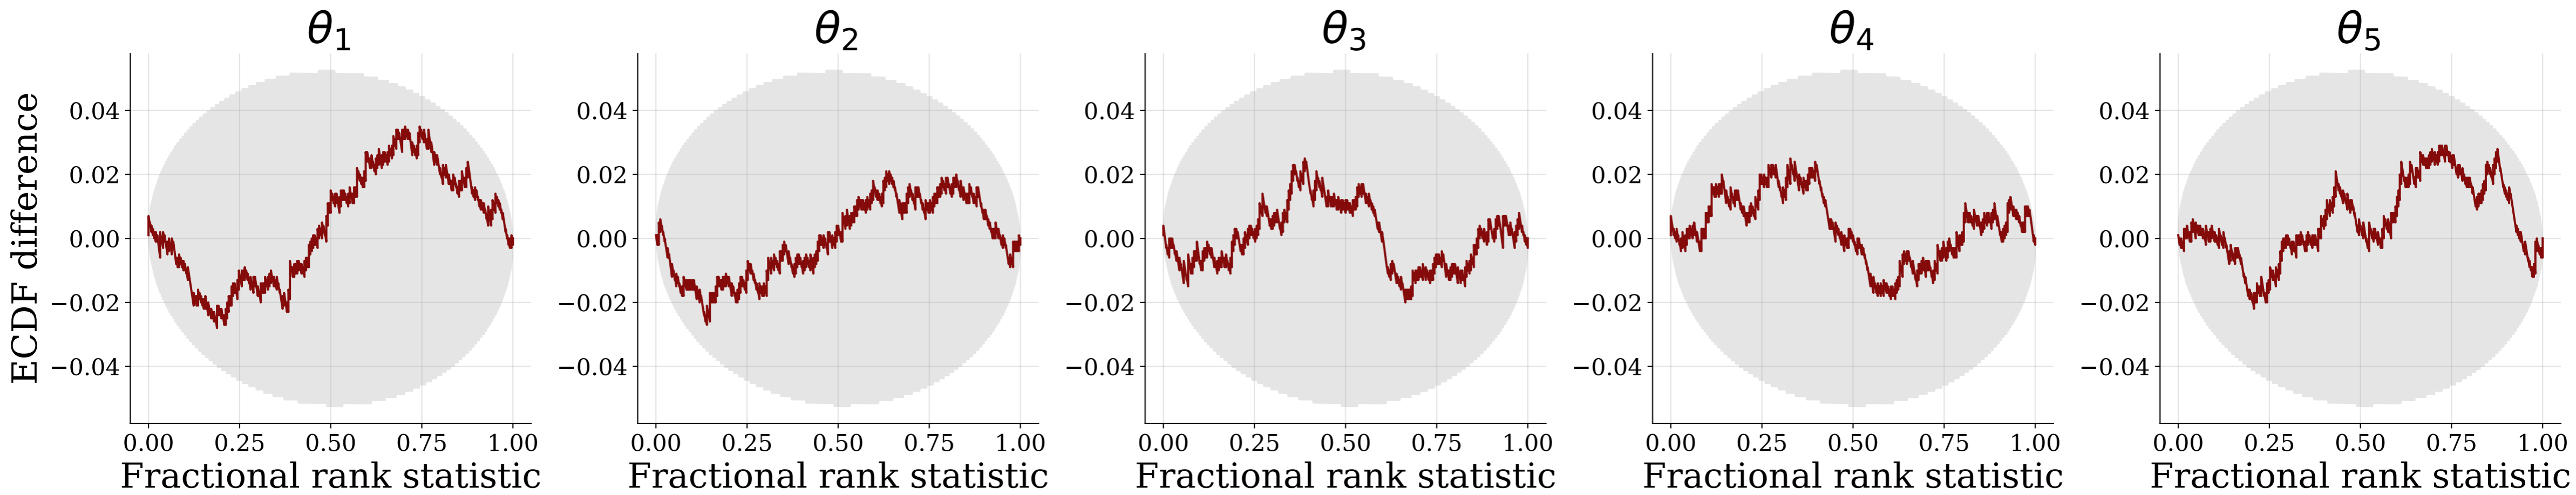

Supplement: supplementary_material [file attachment]

True

NPE-C

SNRE-B

SNPE-C

SNVI

SNPLA

JANA

 $N = 2000$ 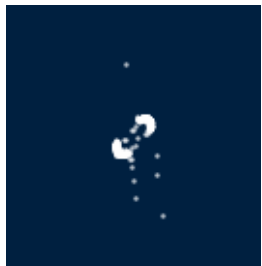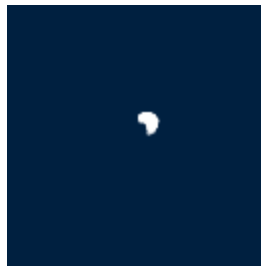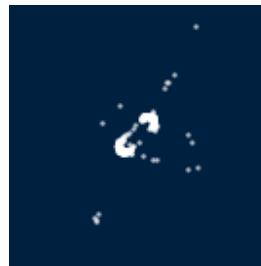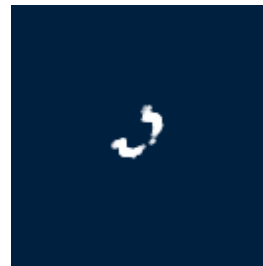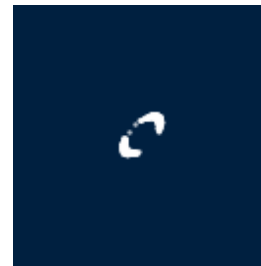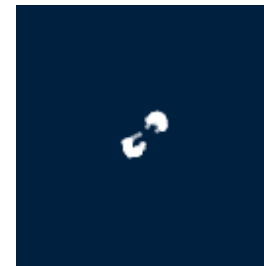 $N = 6000$ 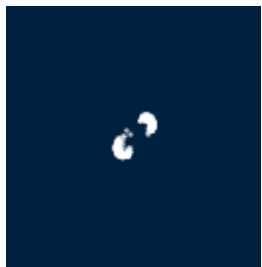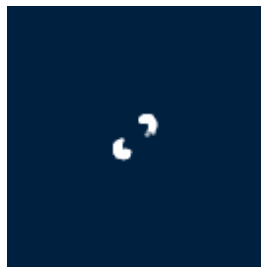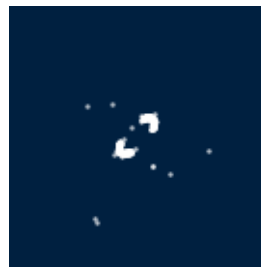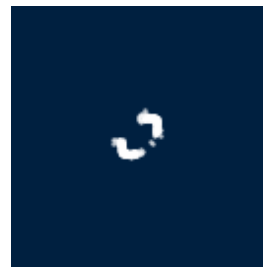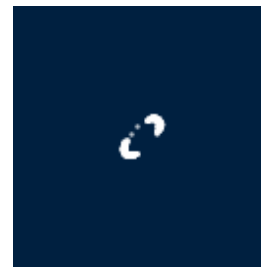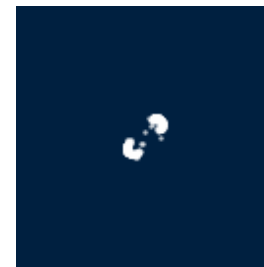 $N = 10000$

Supplement: supplementary_material [file attachment]

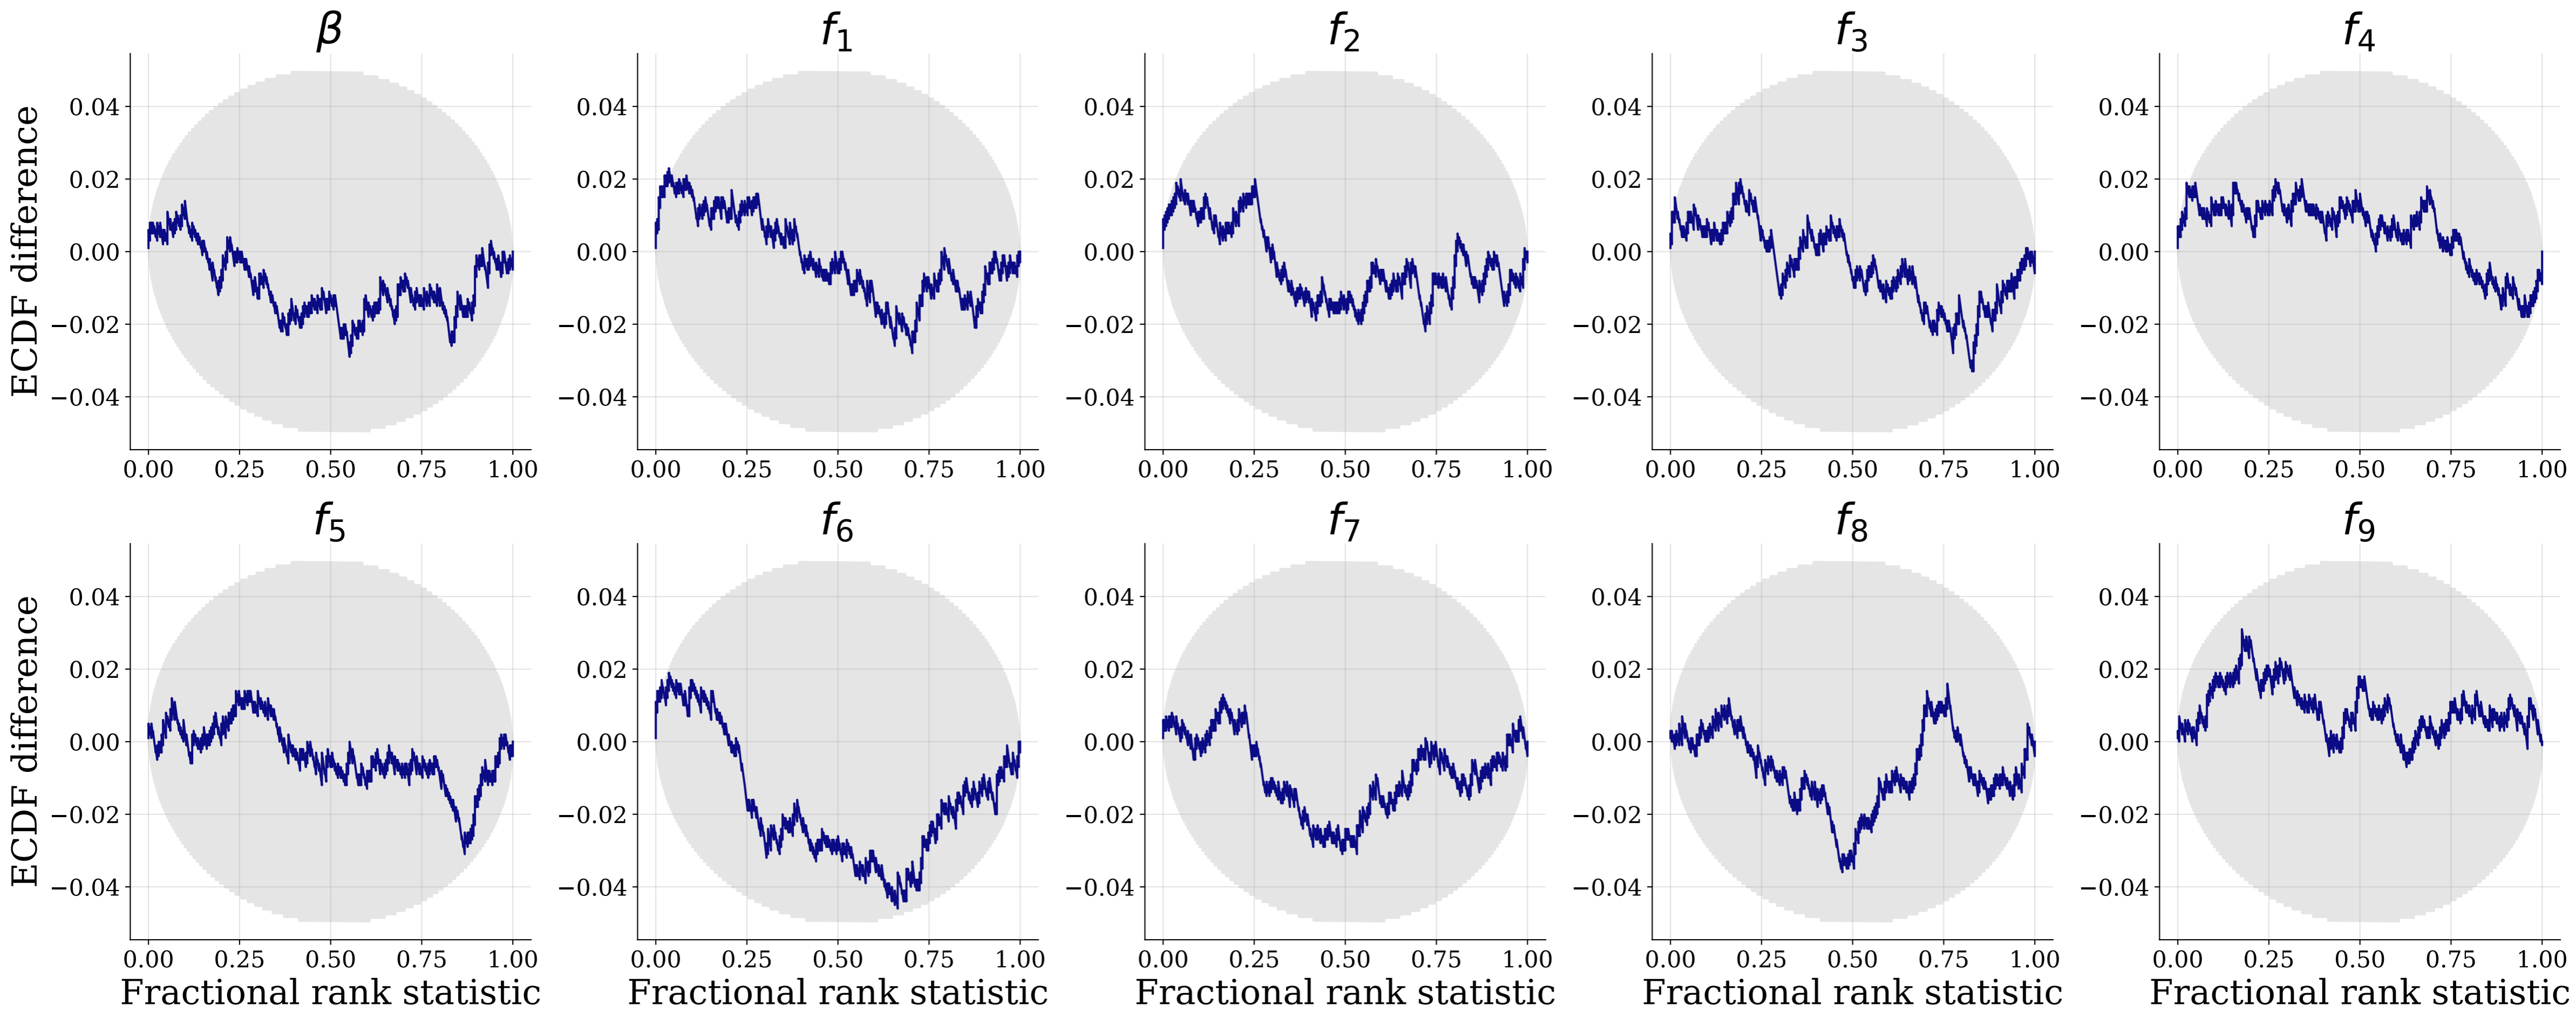

Supplement: supplementary_material [file attachment]

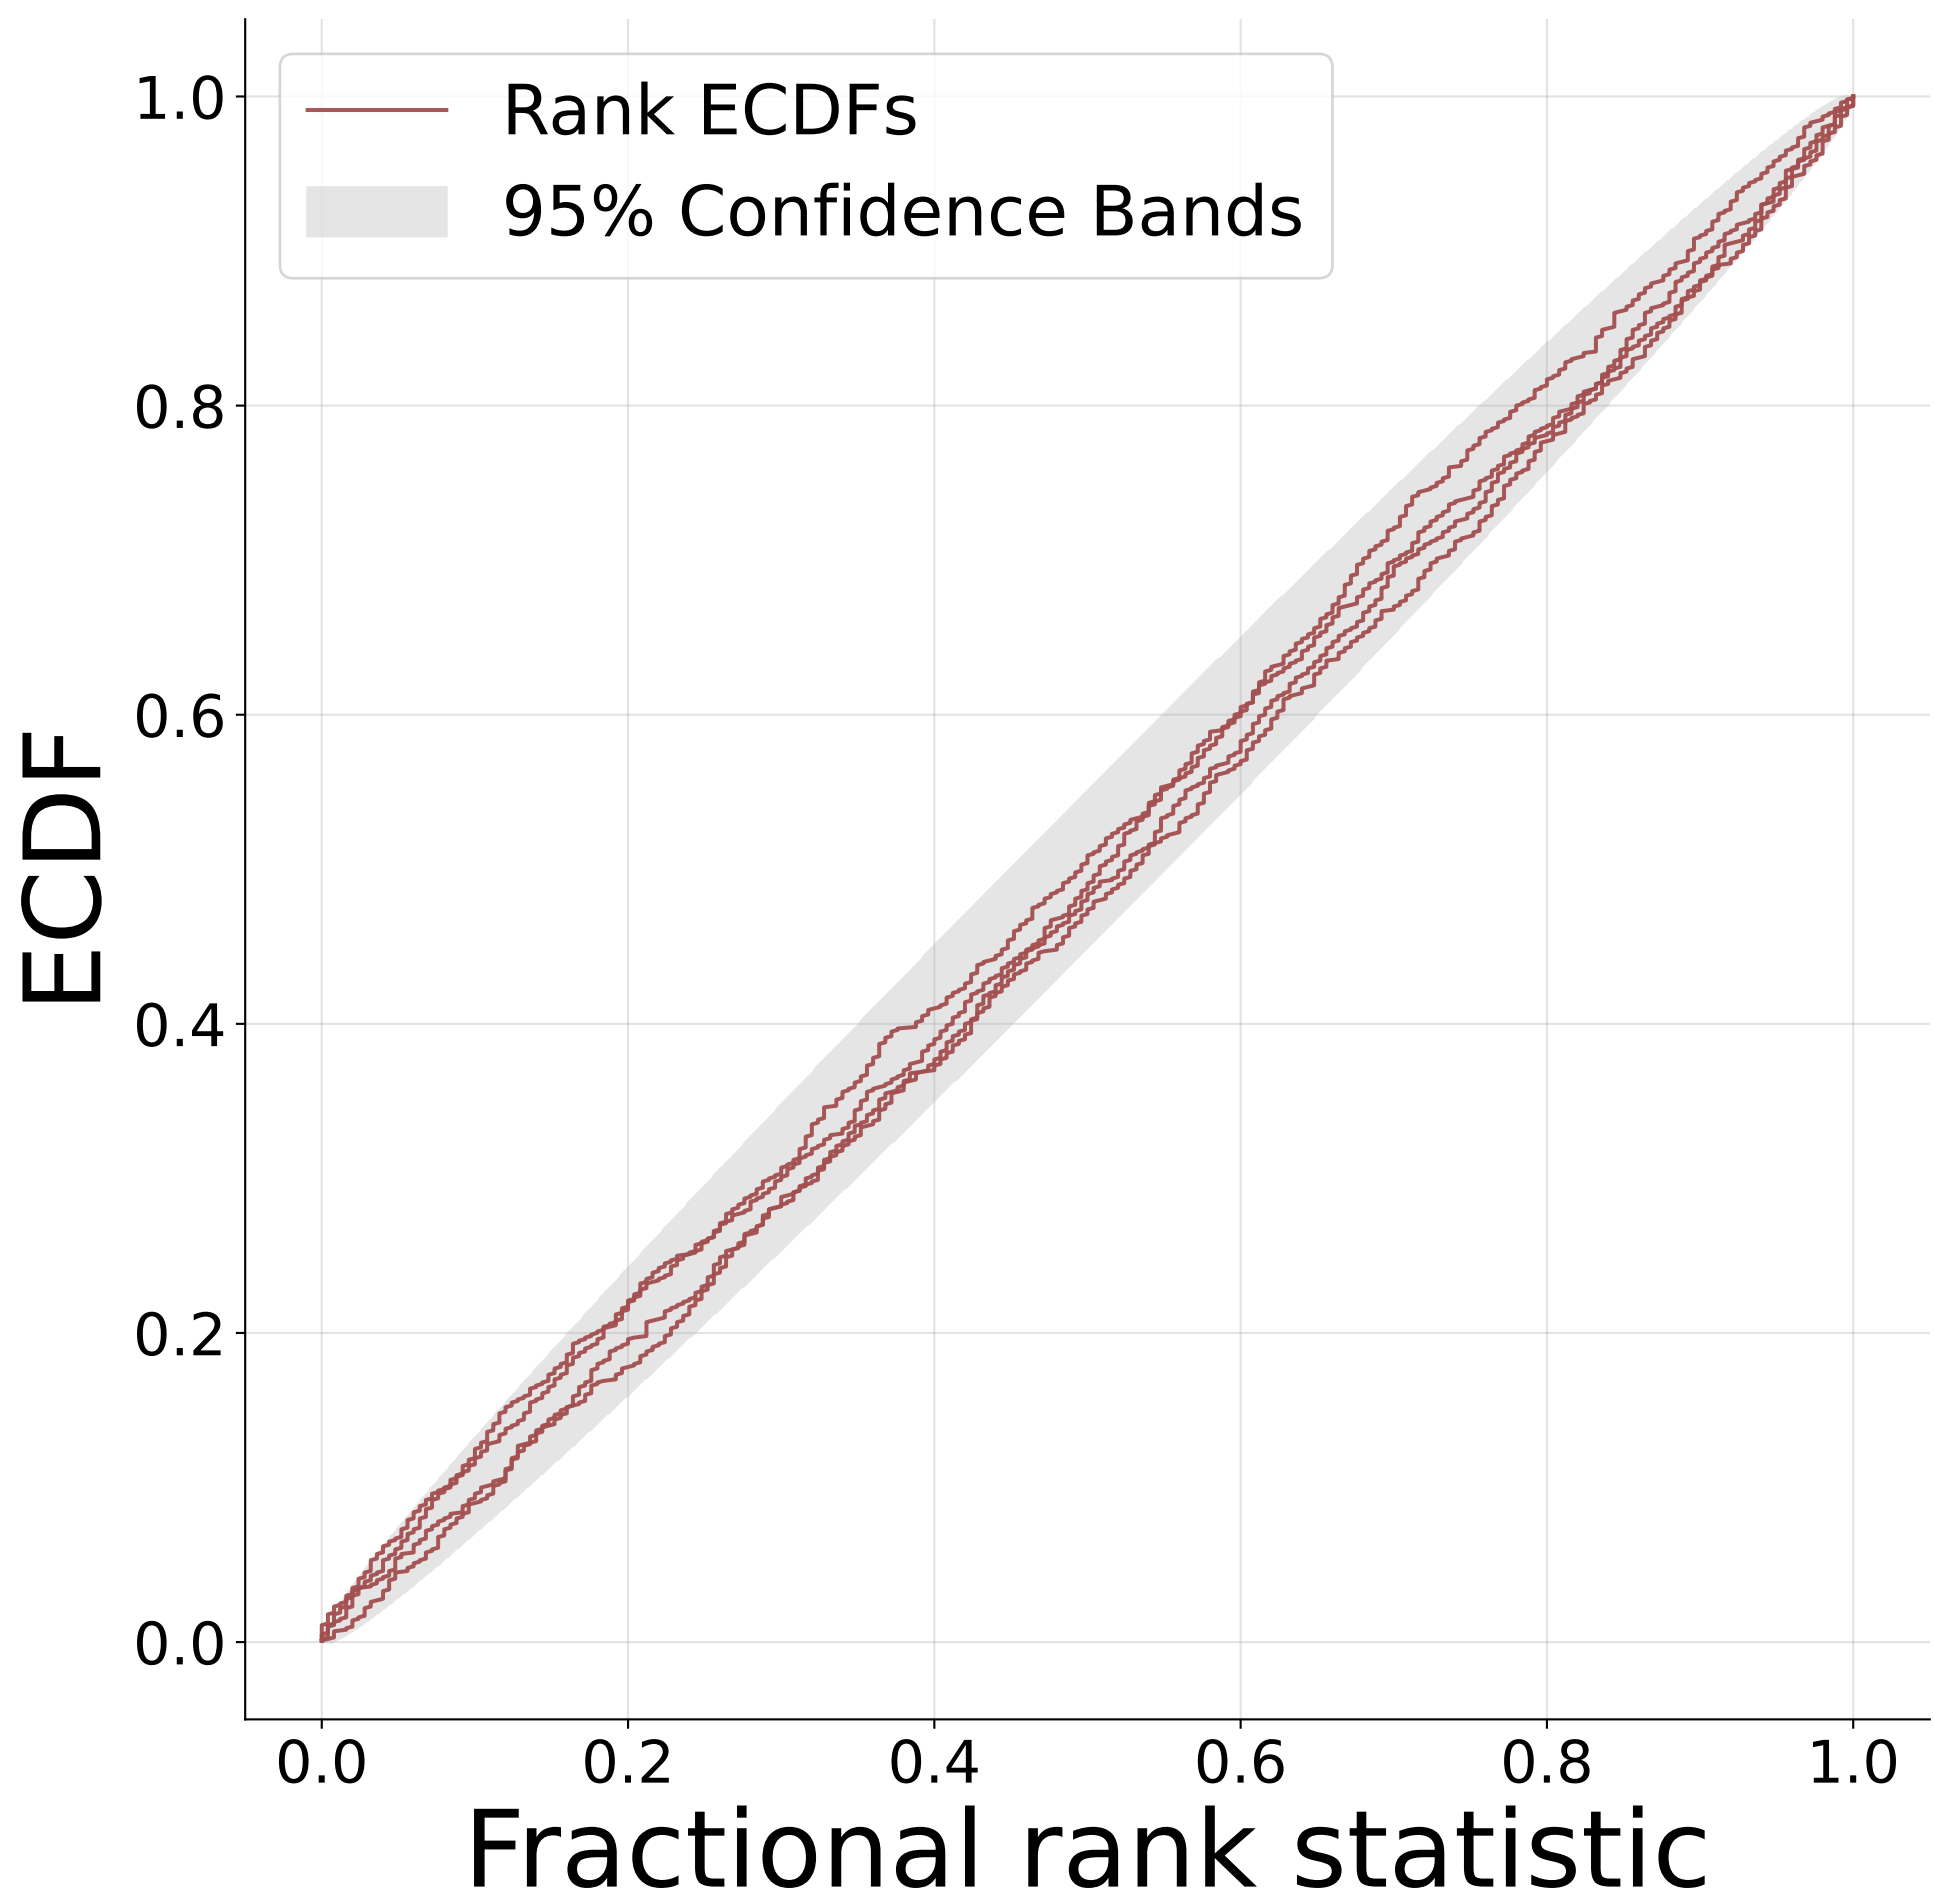

Supplement: supplementary_material [file attachment]

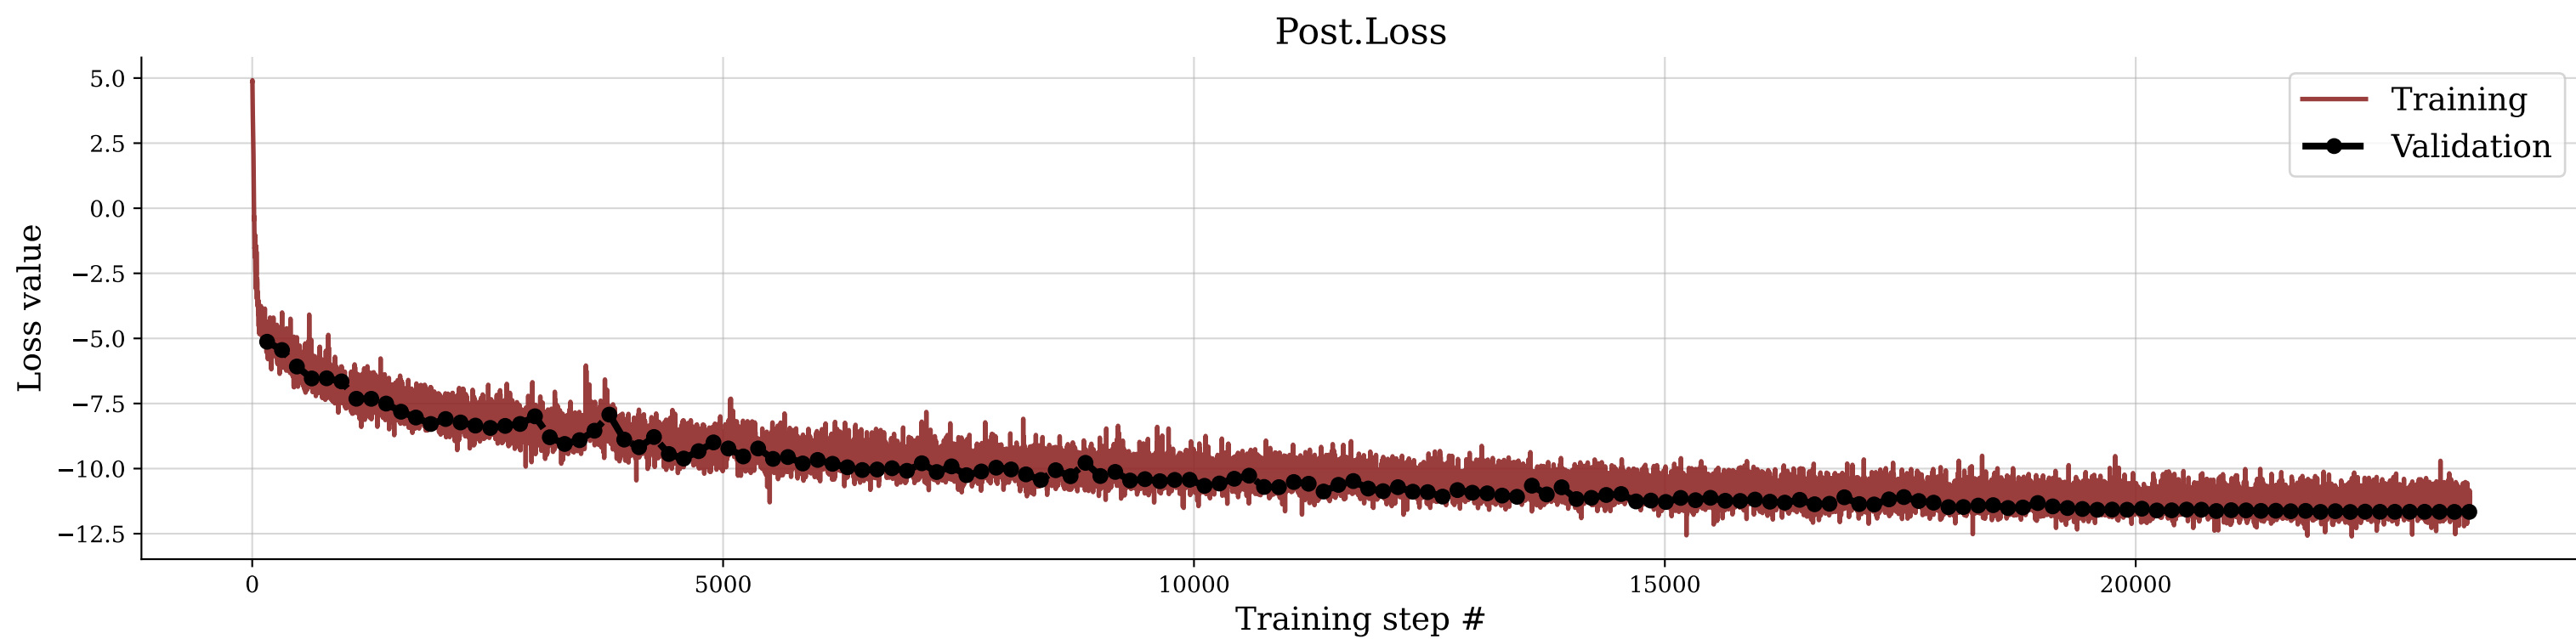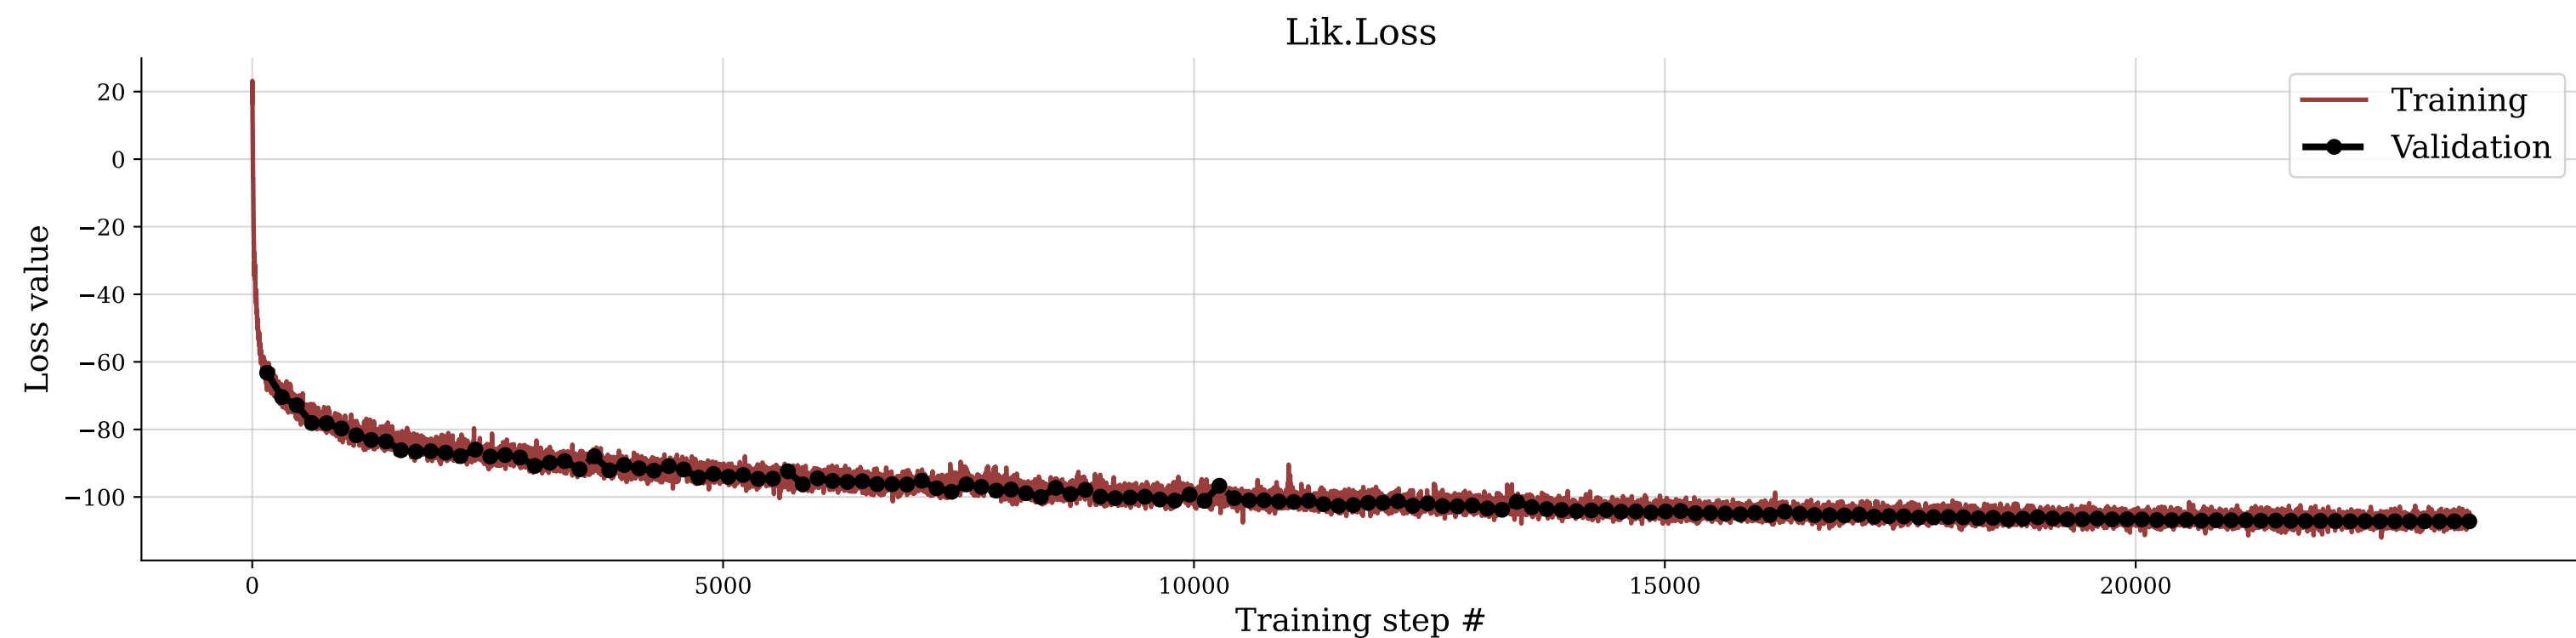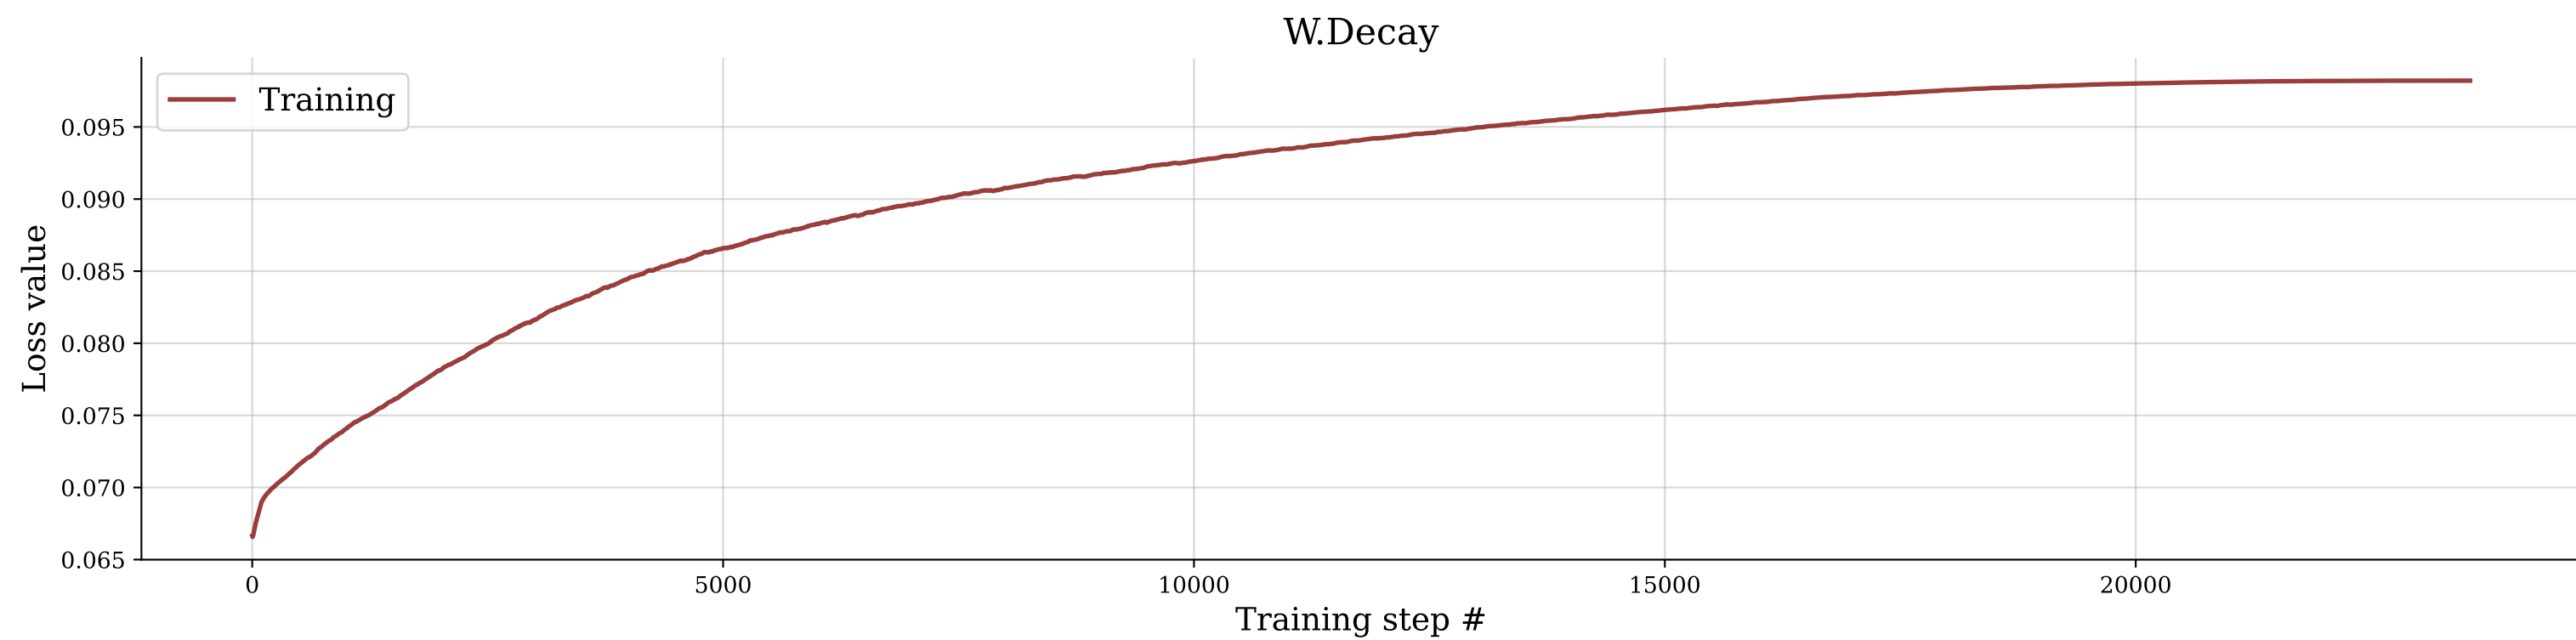

Supplement: supplementary_material [file attachment]

ECDF difference

$\mu_1$

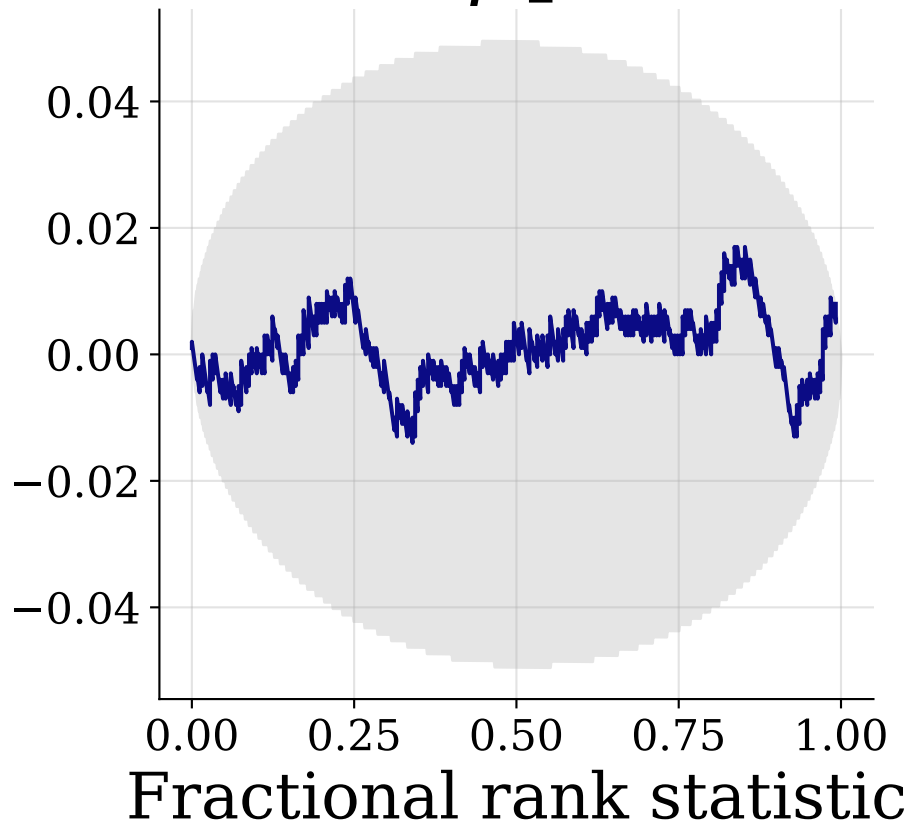

$\mu_2$

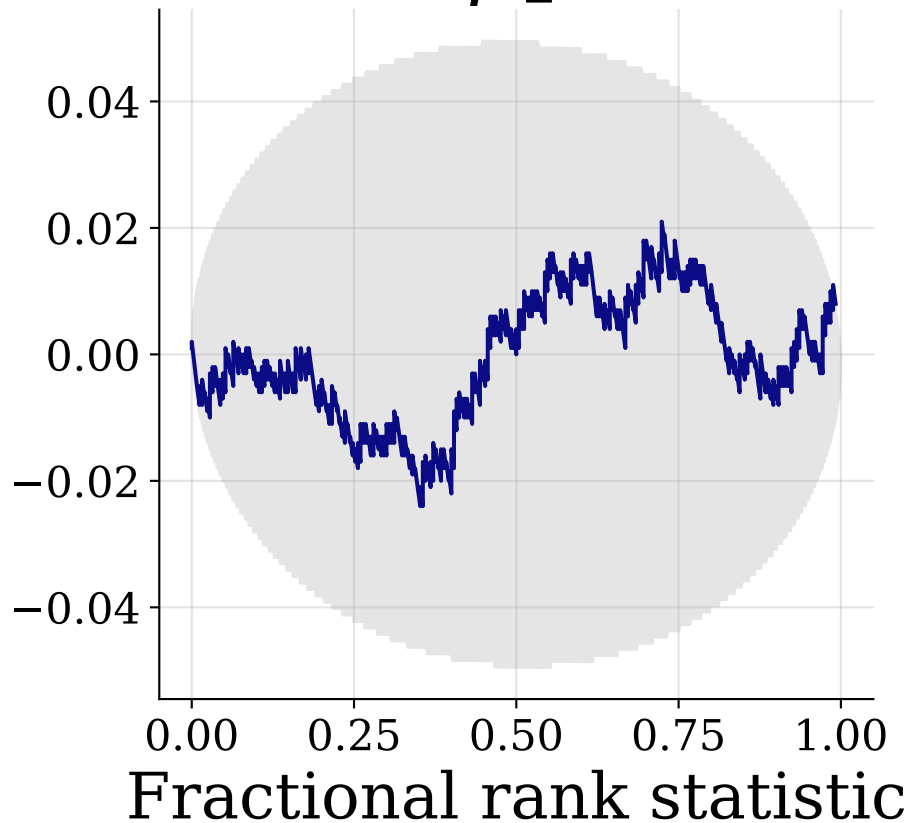

Supplement: supplementary_material [file attachment]

ECDF difference

$\mu_1$

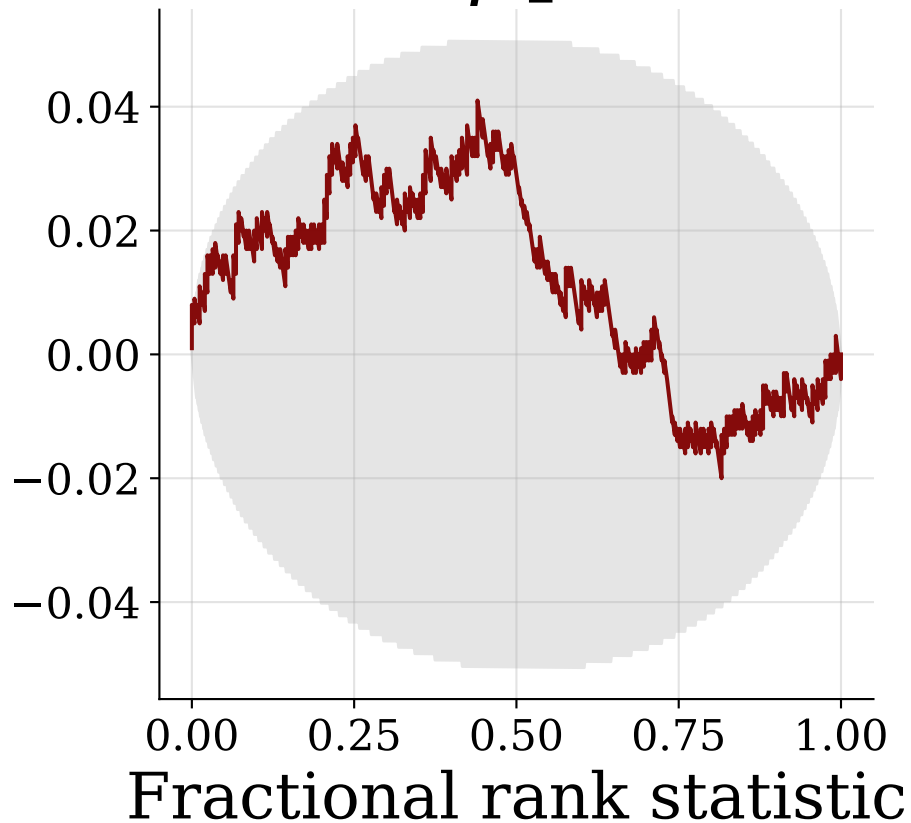

$\mu_2$

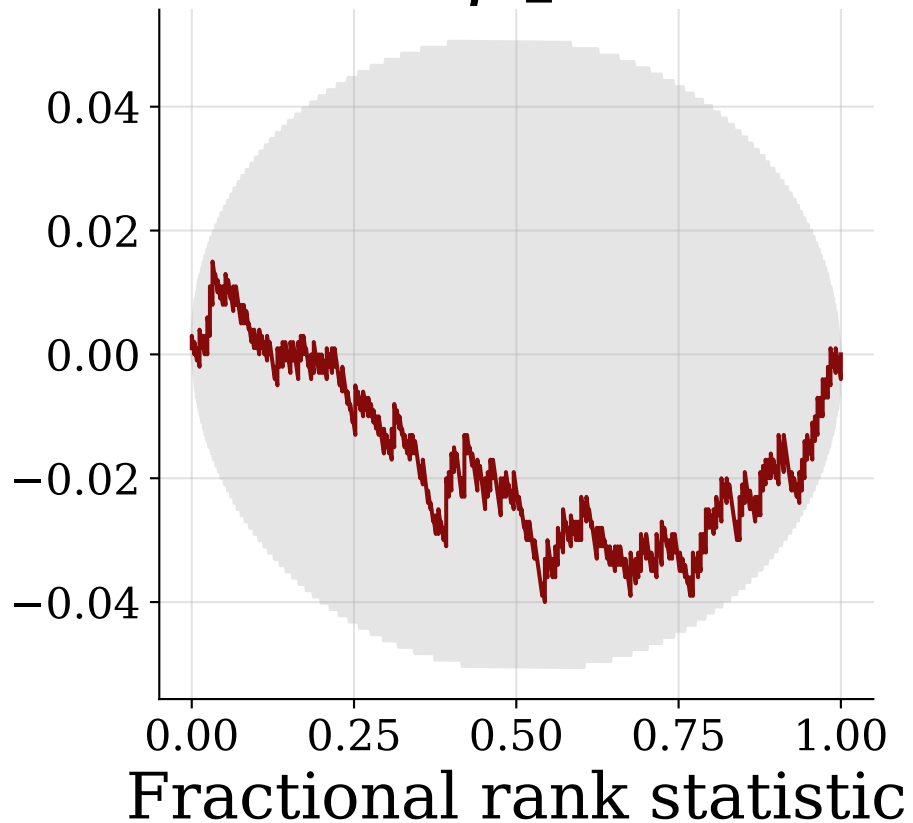

Supplement: supplementary_material [file attachment]

True

NPE-C

SNRE-B

SNPE-C

SNVI

SNPLA

JANA

 $N = 2000$  $N = 6000$  $N = 10000$ 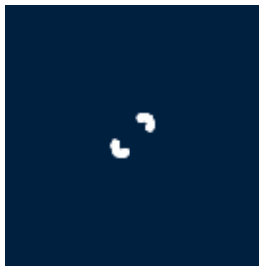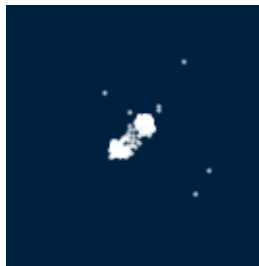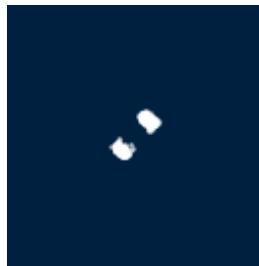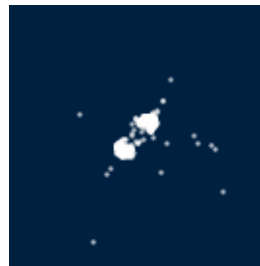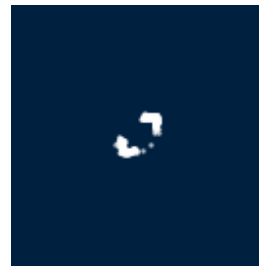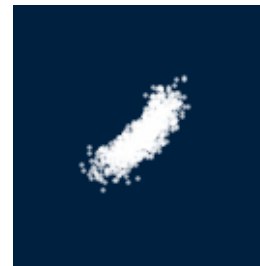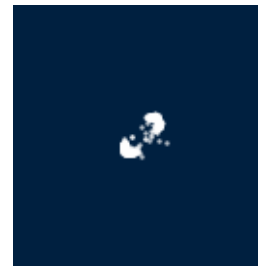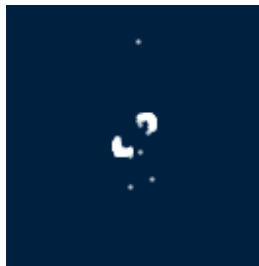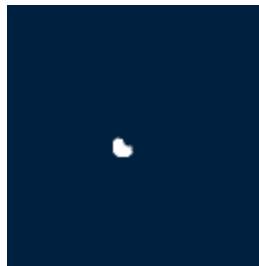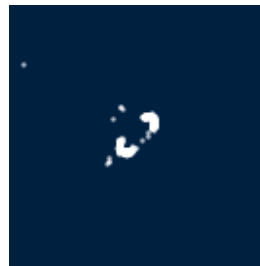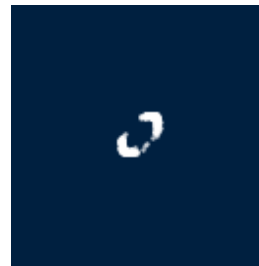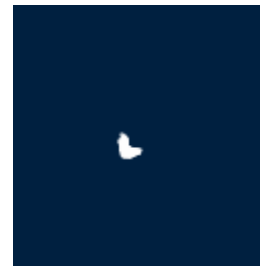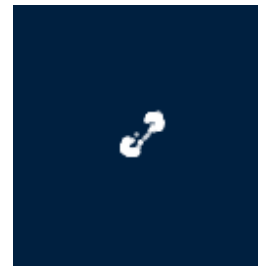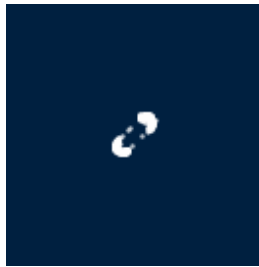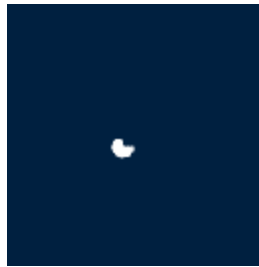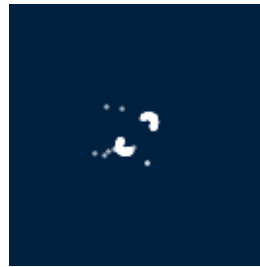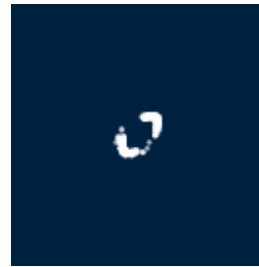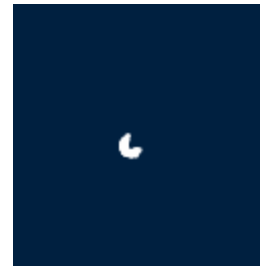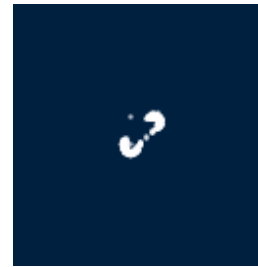

Supplement: supplementary_material [file attachment]

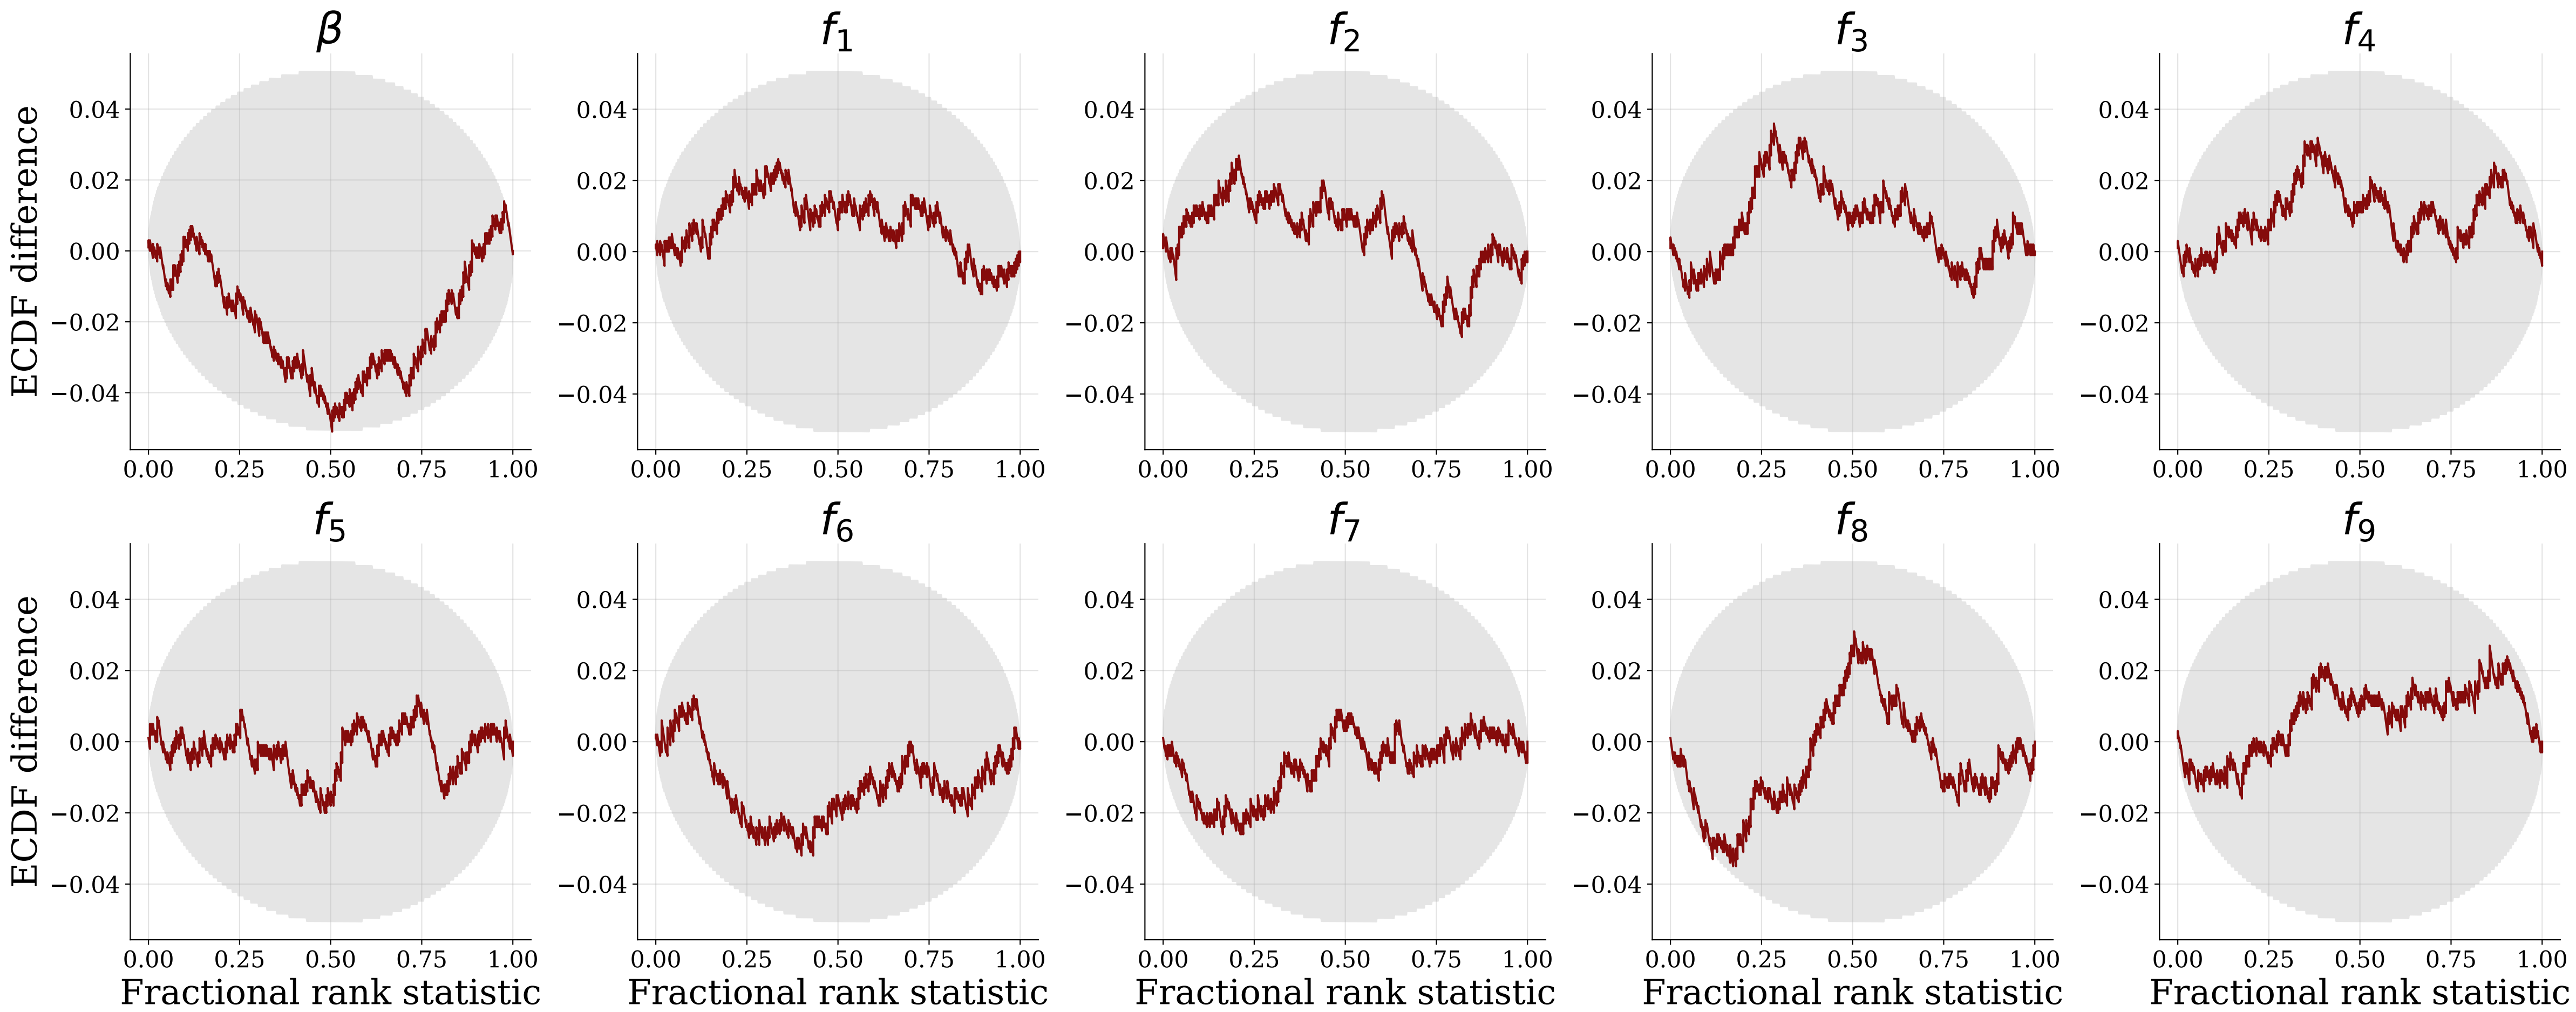

Supplement: supplementary_material [file attachment]

True

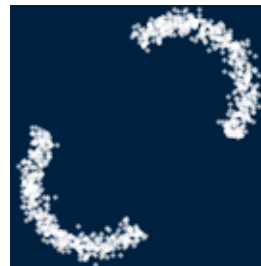

gSMC

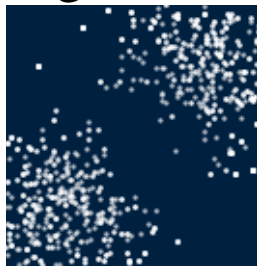

NPE-C

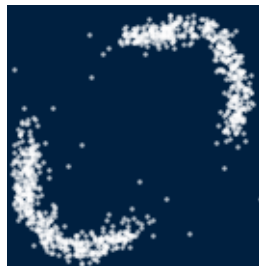

SNRE-B

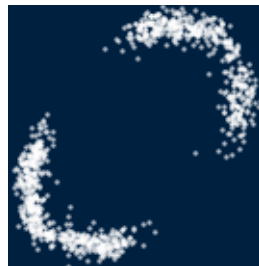

SNPE-C

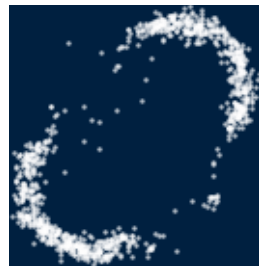

SNVI

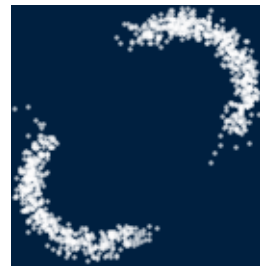

SNPLA

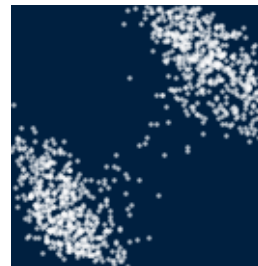

JANA

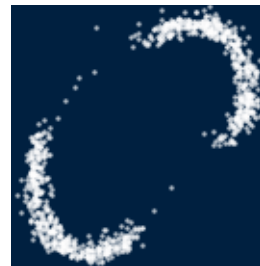 $N = 2000$ 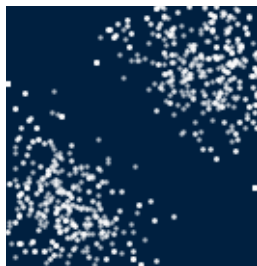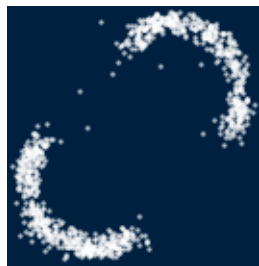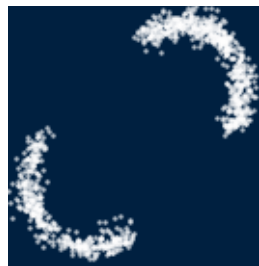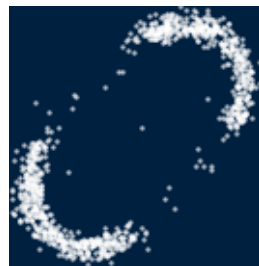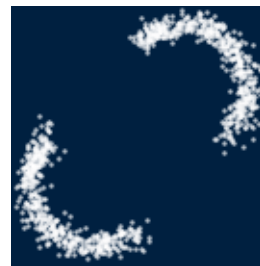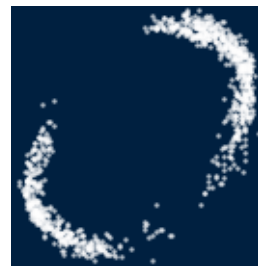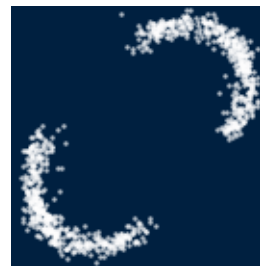 $N = 6000$ 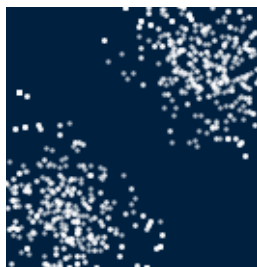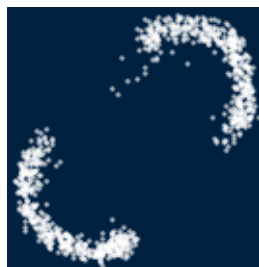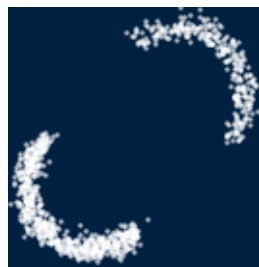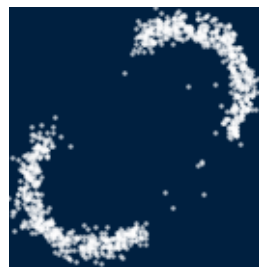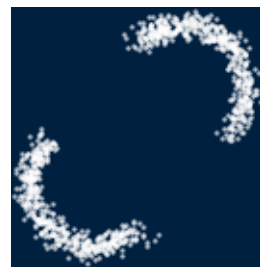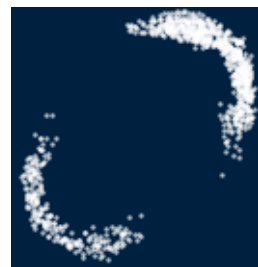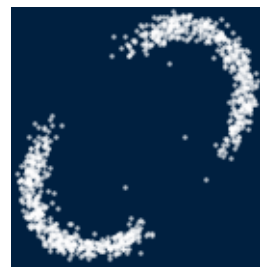 $N = 10000$

Supplement: supplementary_material [file attachment]

ECDF difference

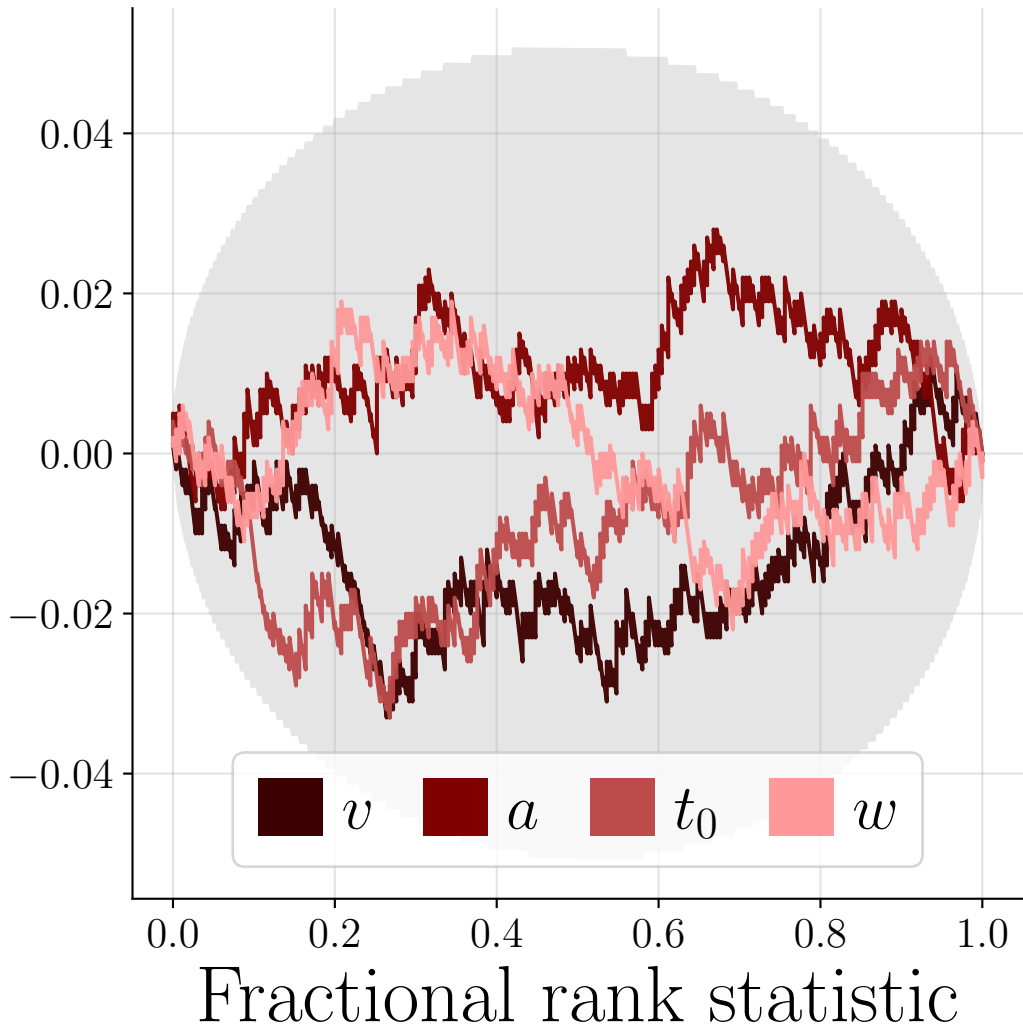

Supplement: supplementary_material [file attachment]

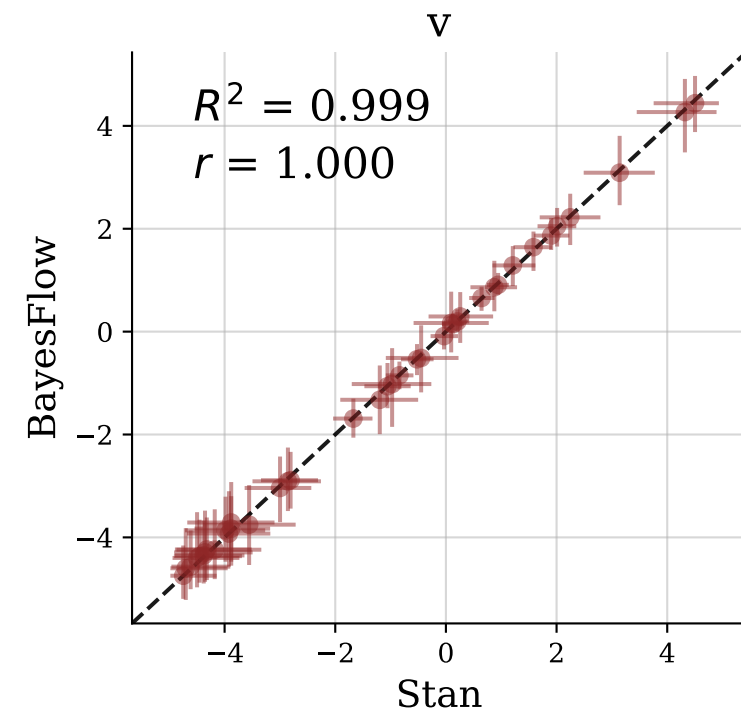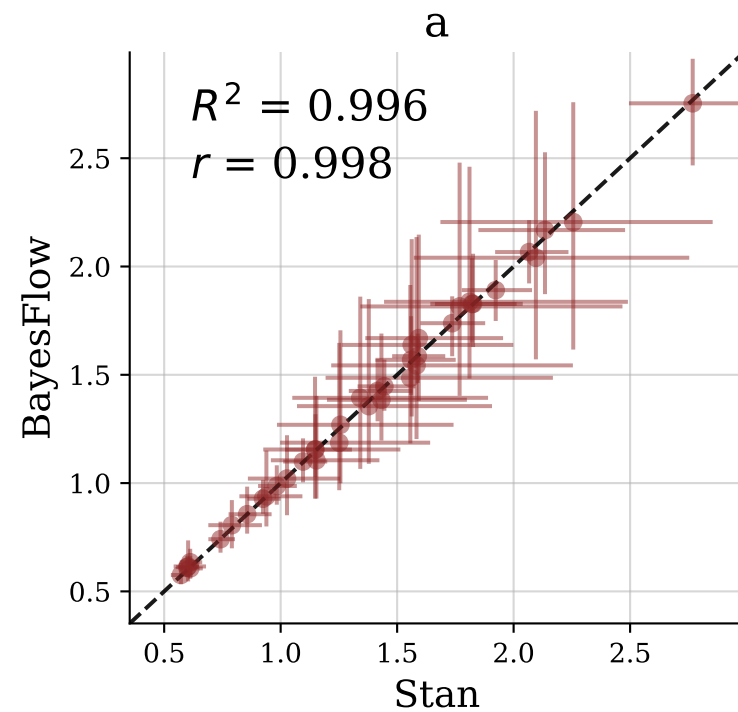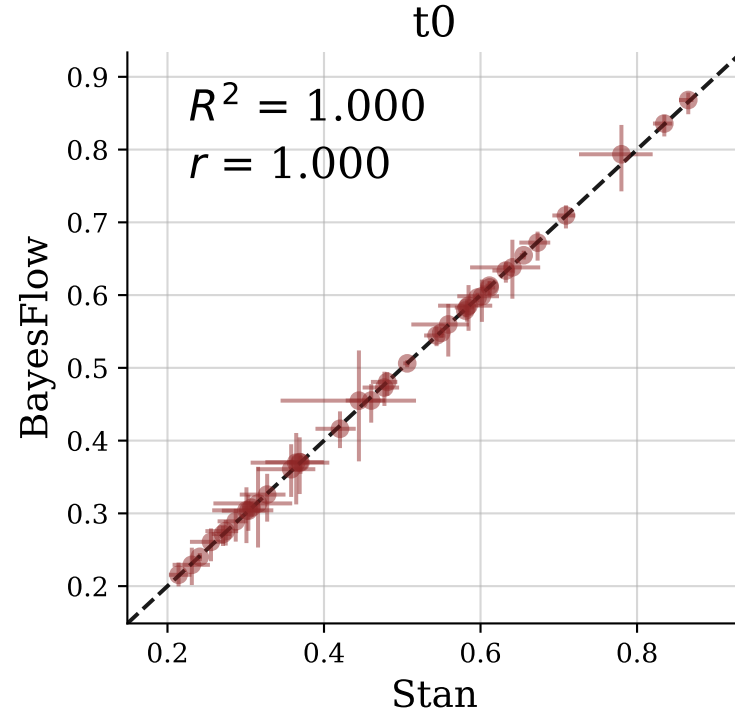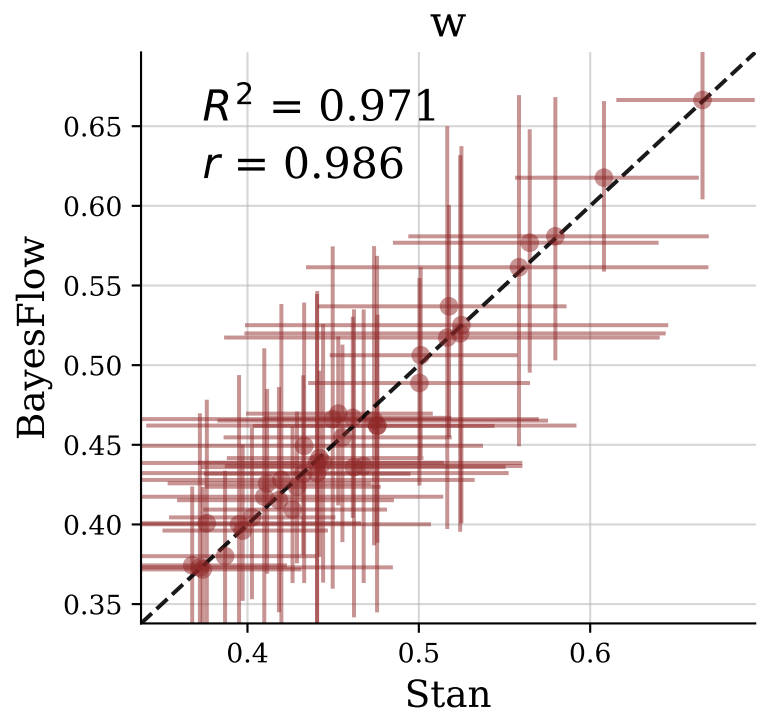

Supplement: supplementary_material [file attachment]

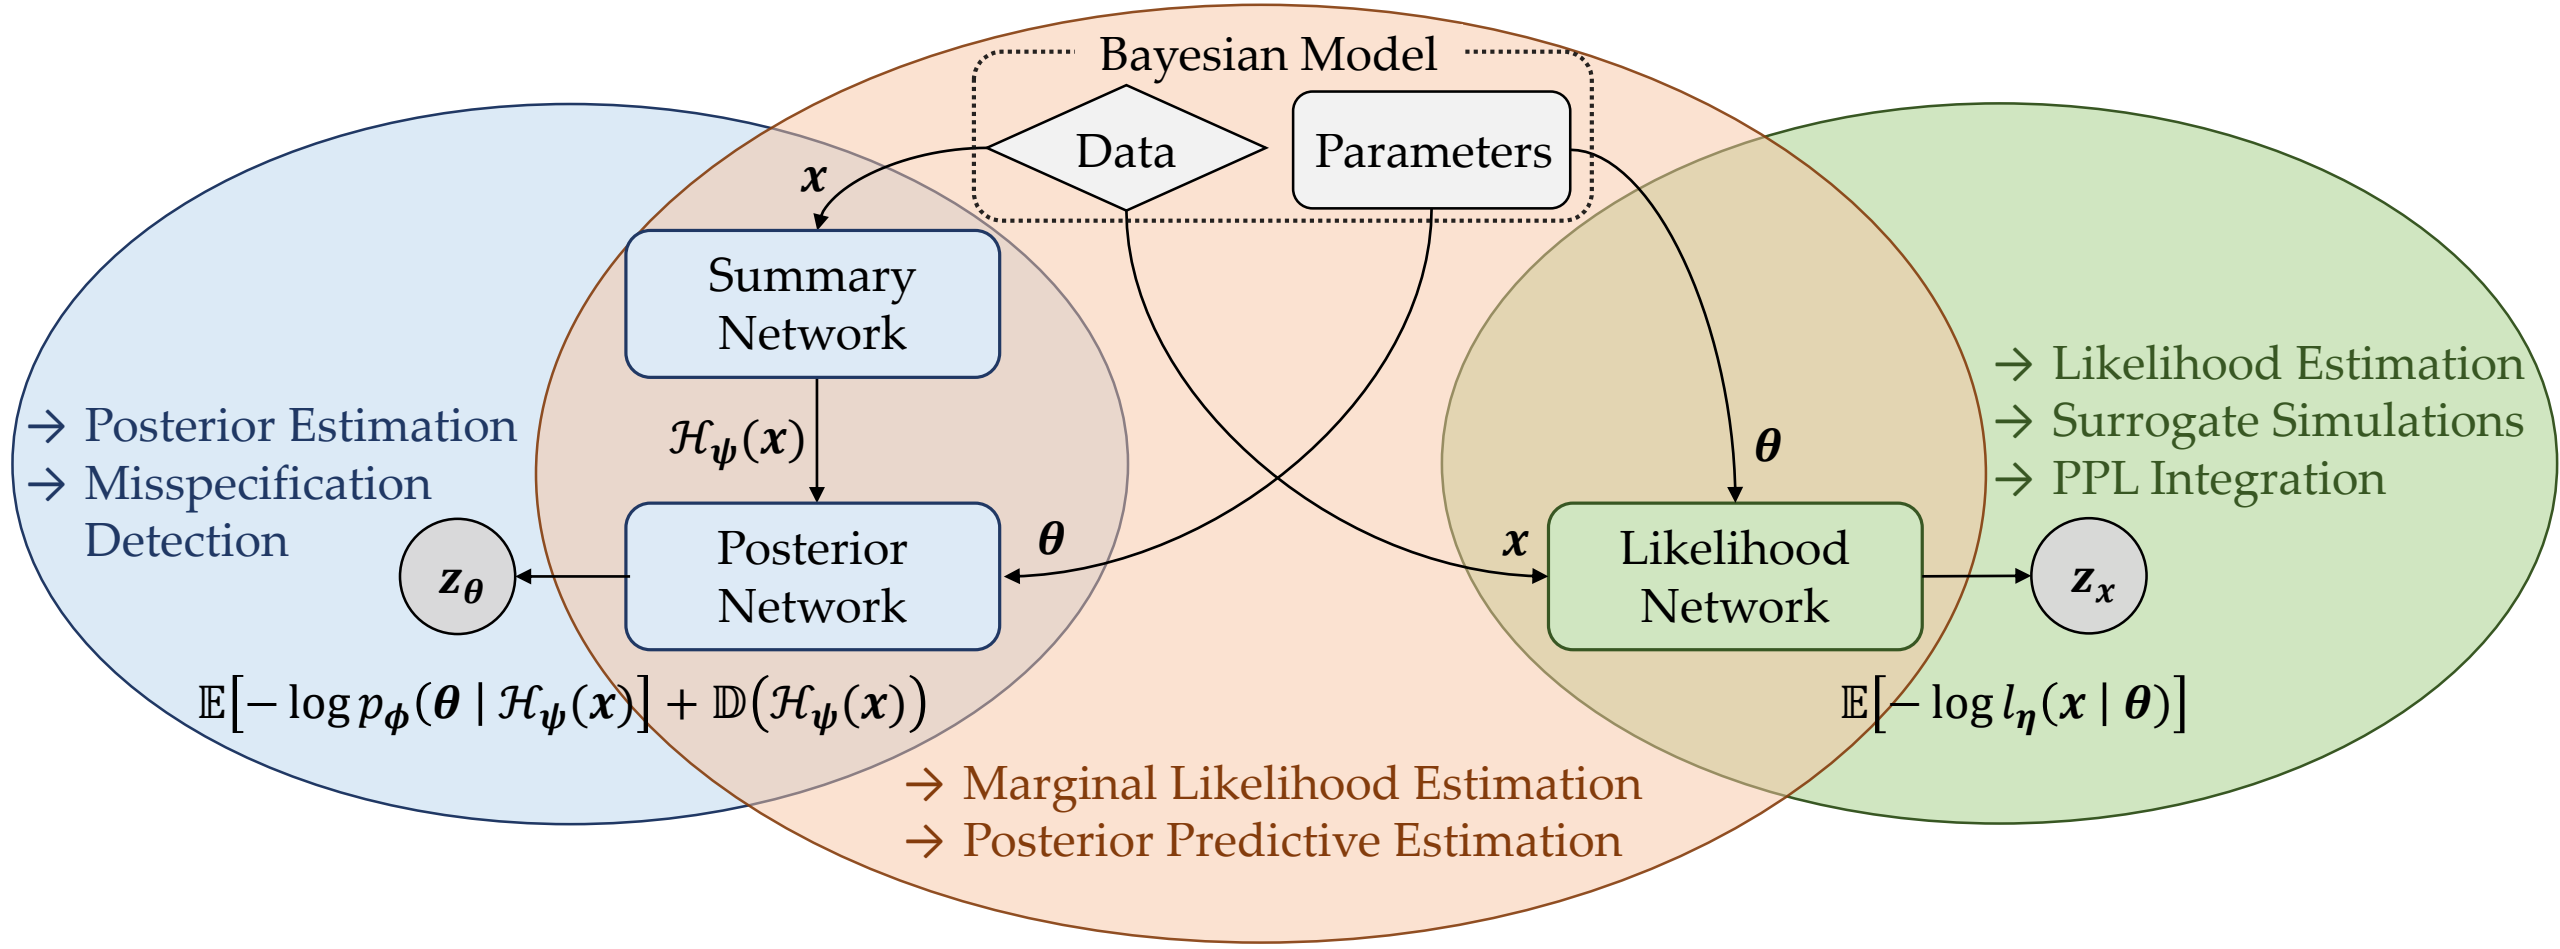

Supplement: supplementary_material [file attachment]

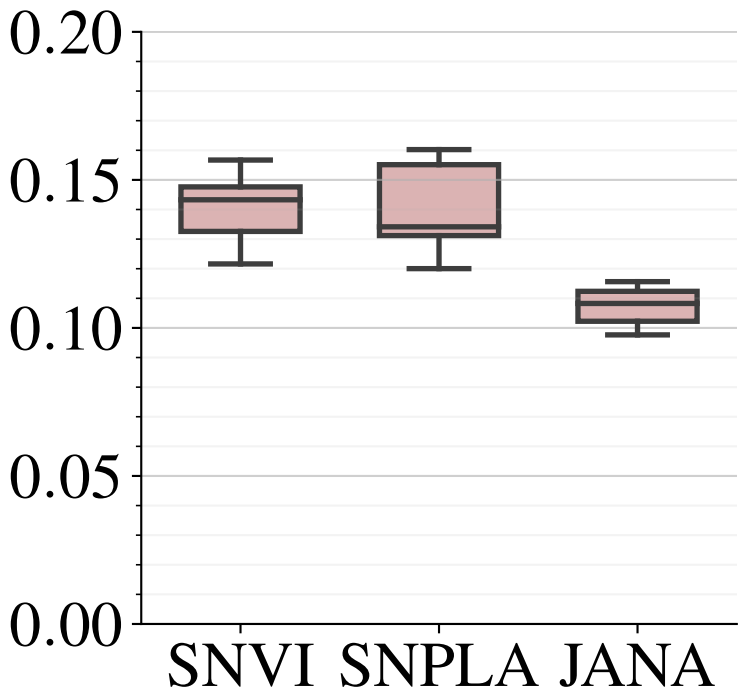

Supplement: supplementary_material [file attachment]

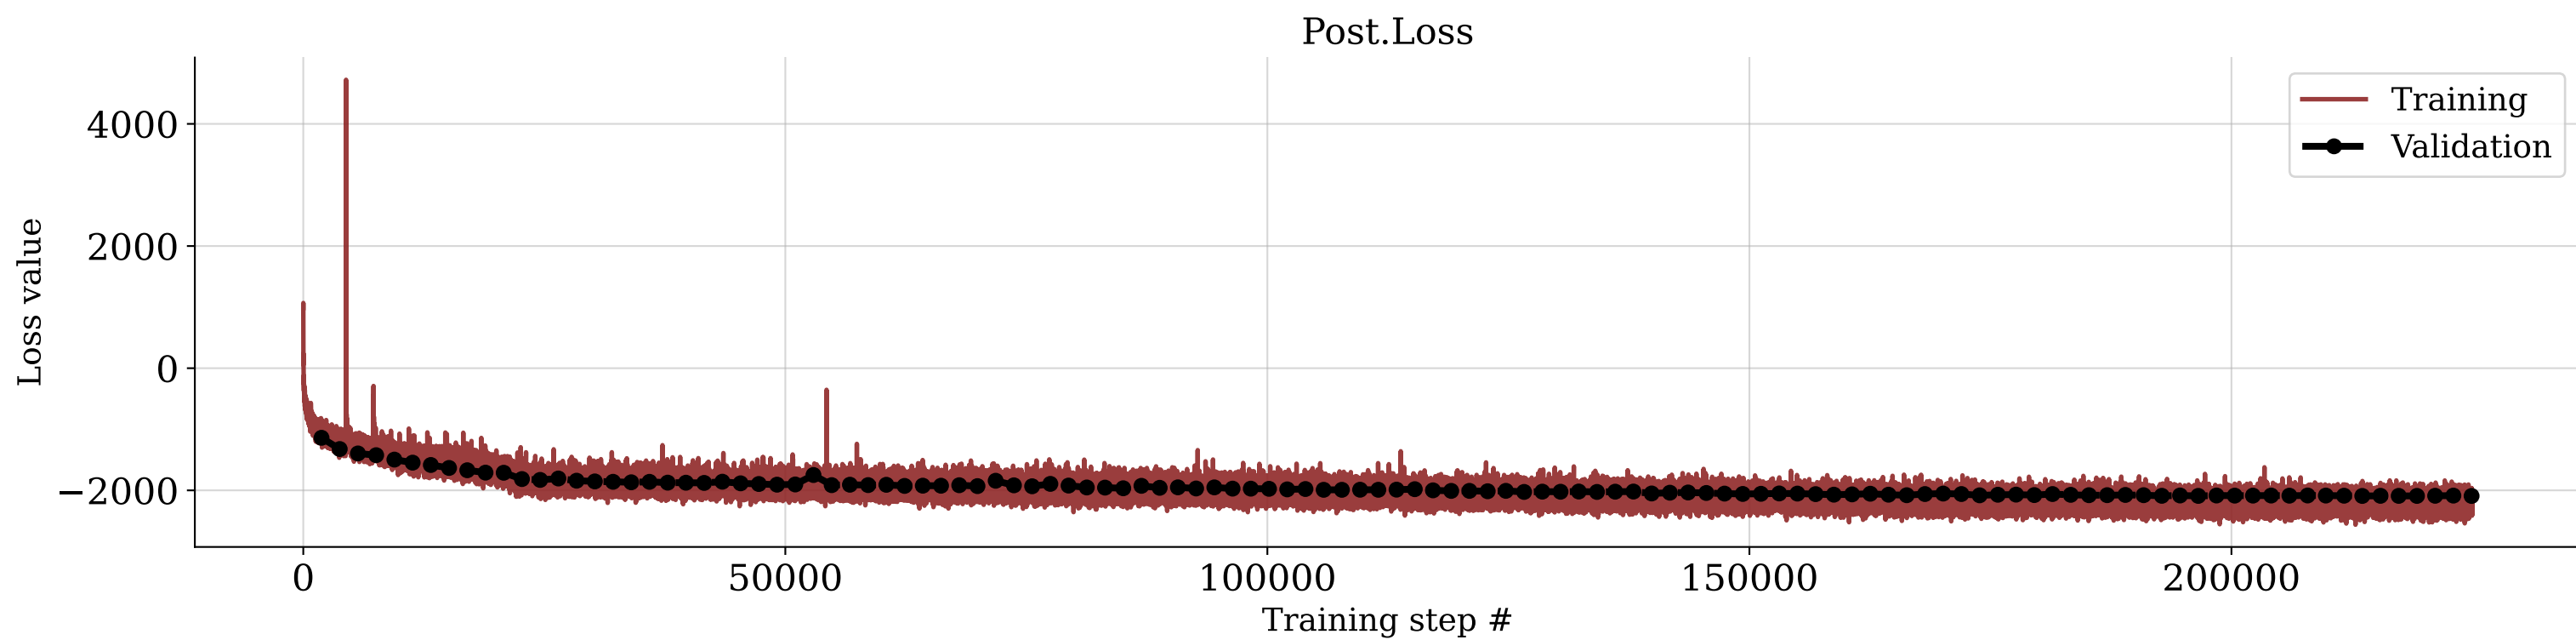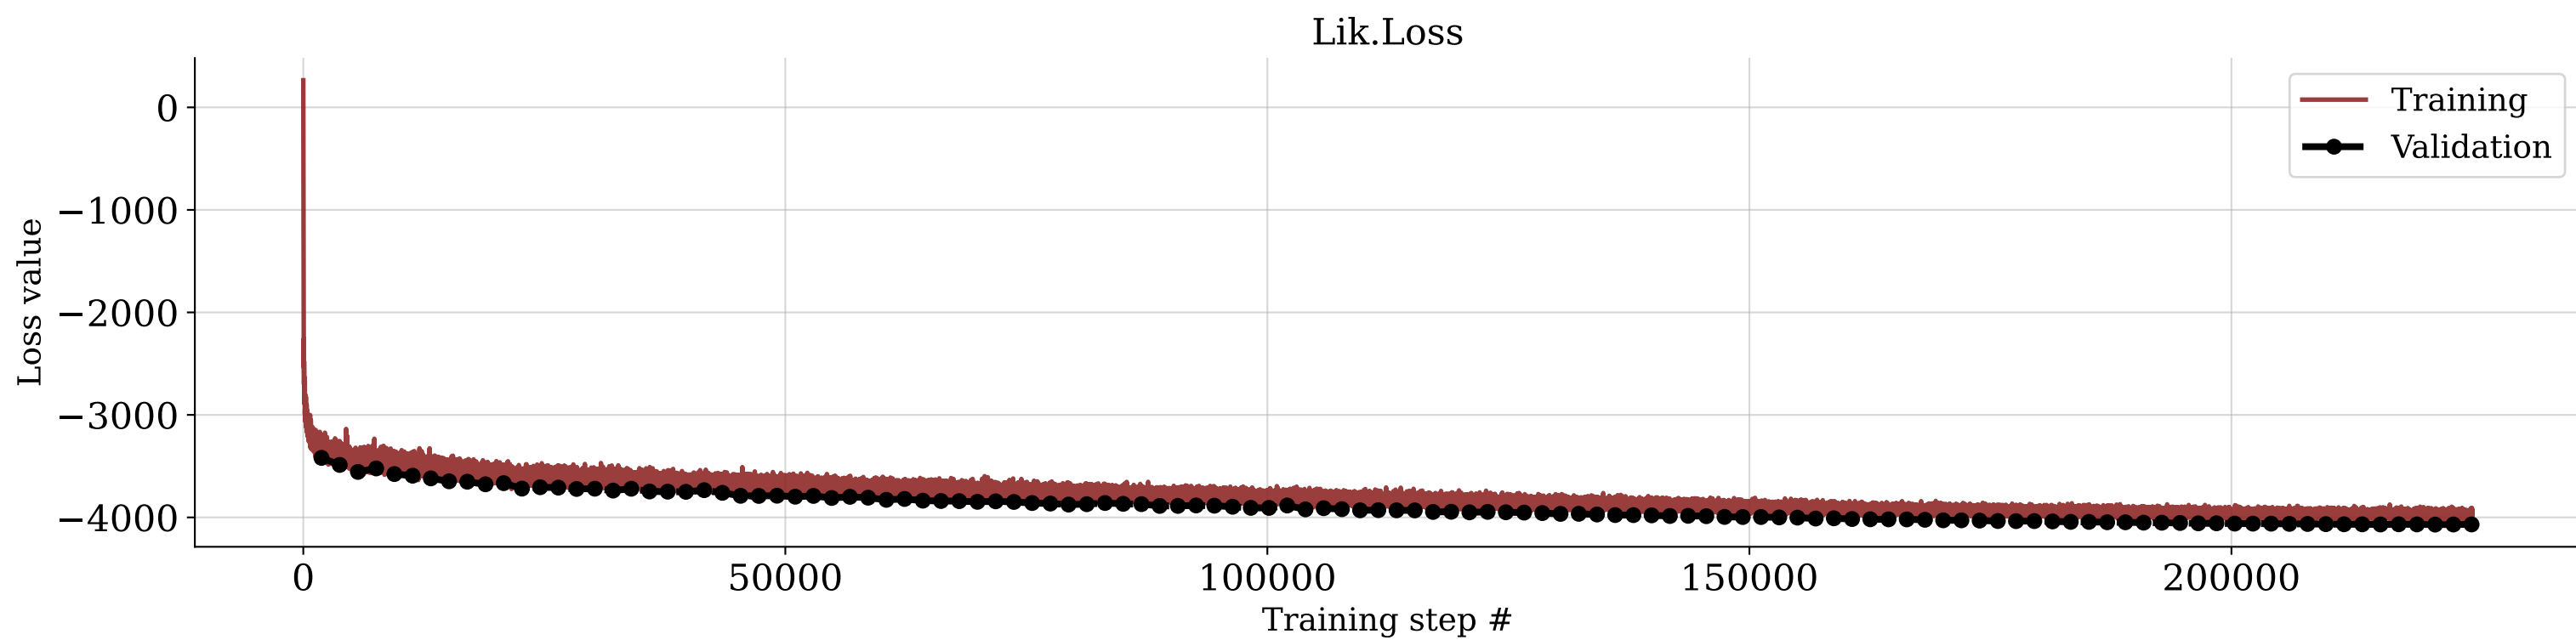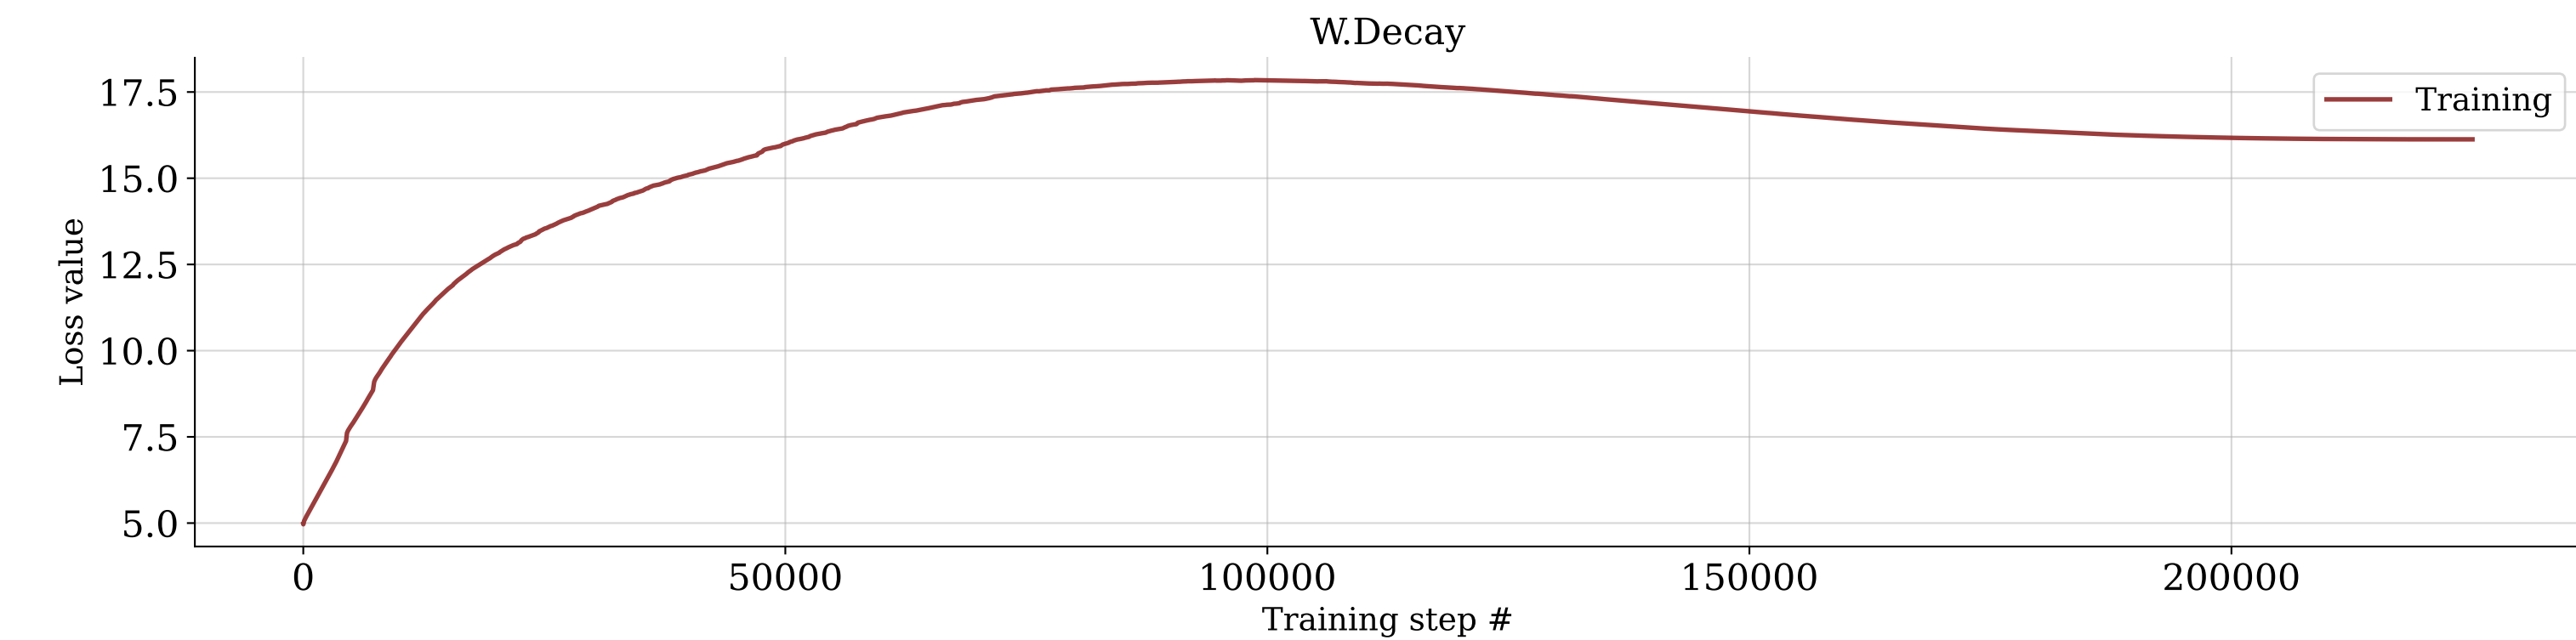

Supplement: supplementary_material [file attachment]

ECDF difference

$\theta_1$

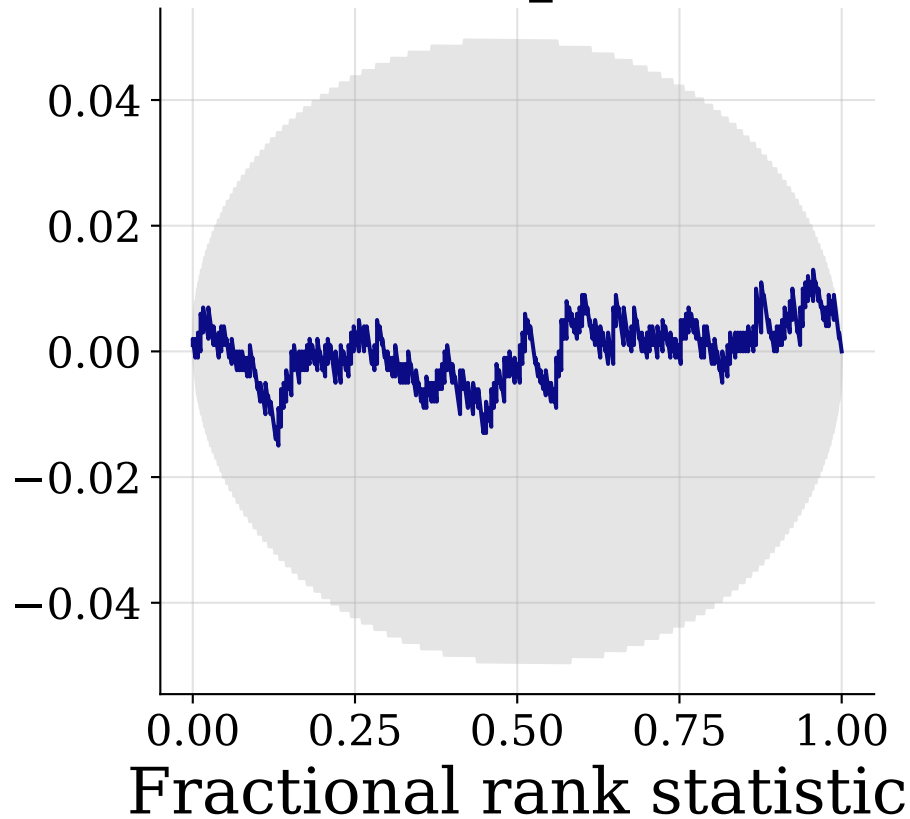

$\theta_2$

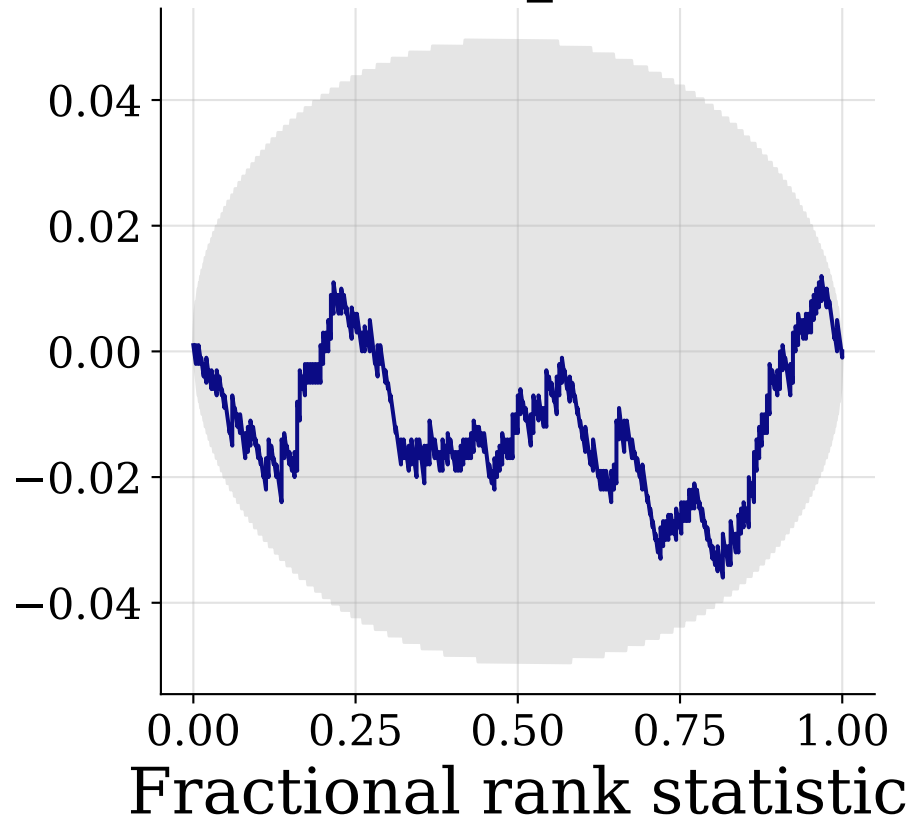

Supplement: supplementary_material [file attachment]

ECDF difference

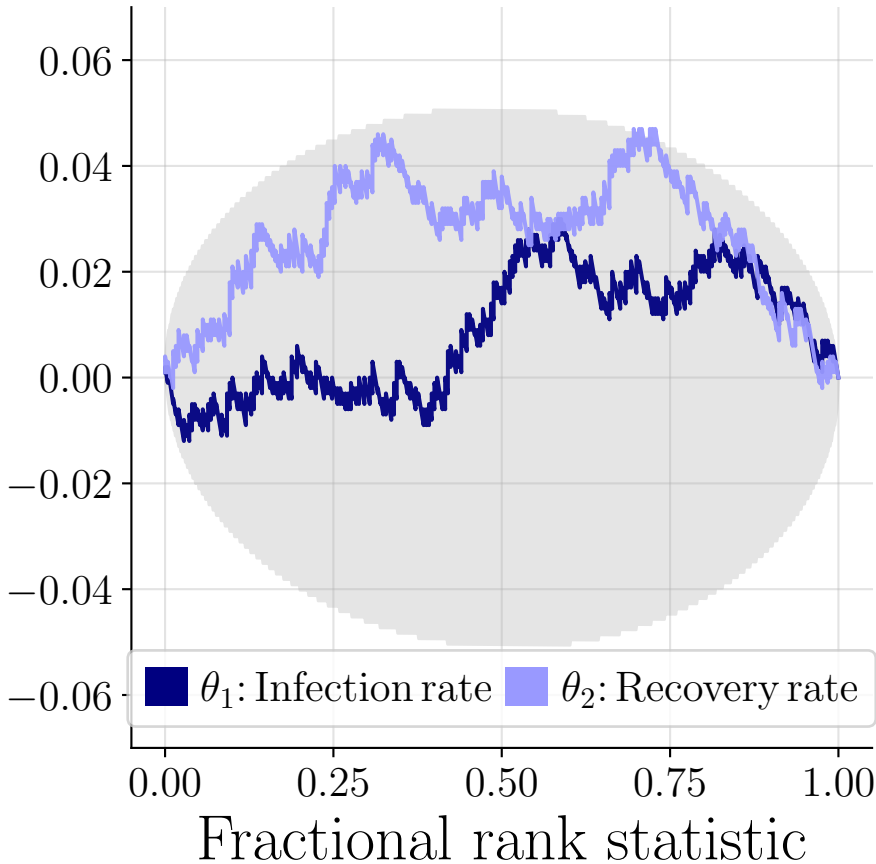

Supplement: supplementary_material [file attachment]

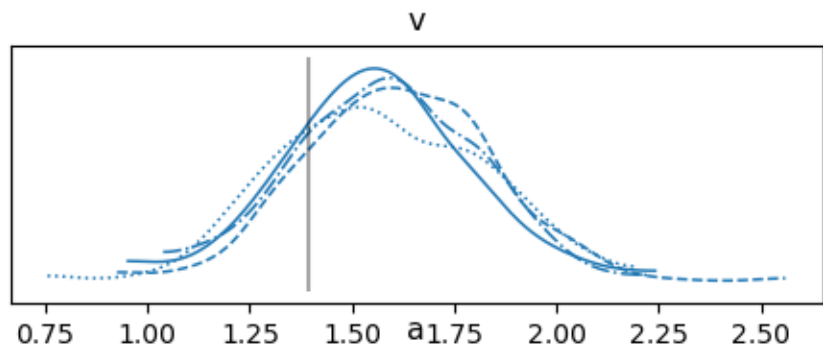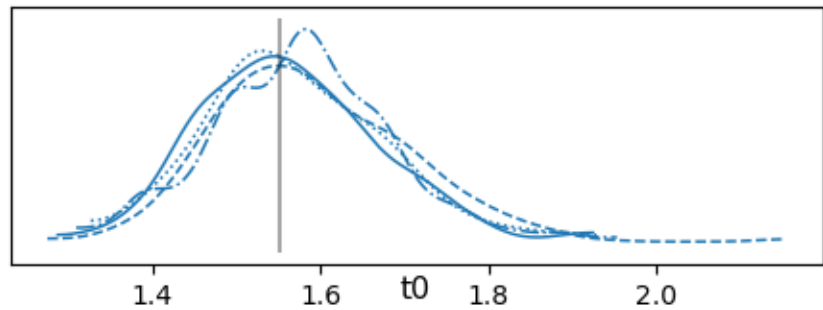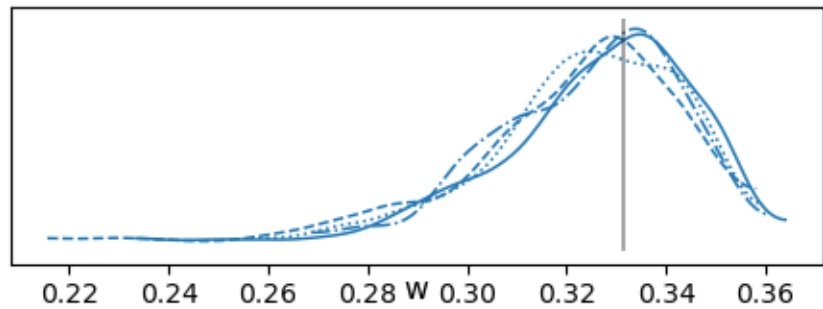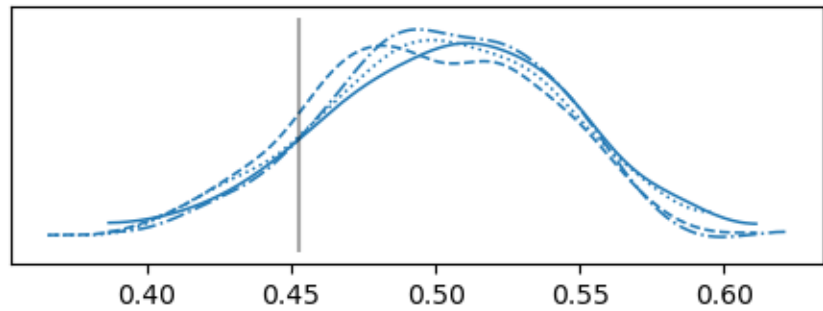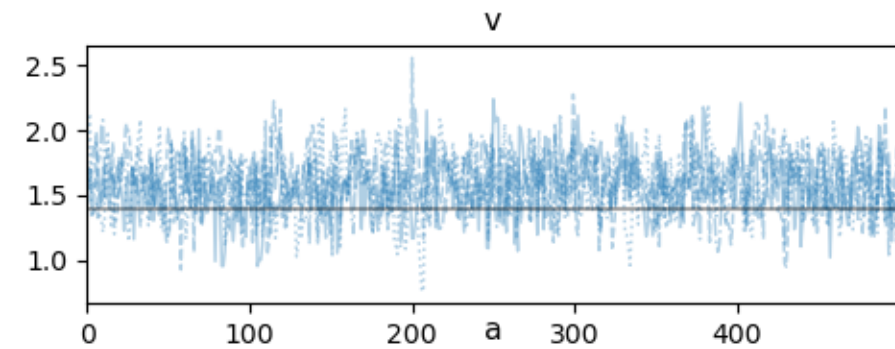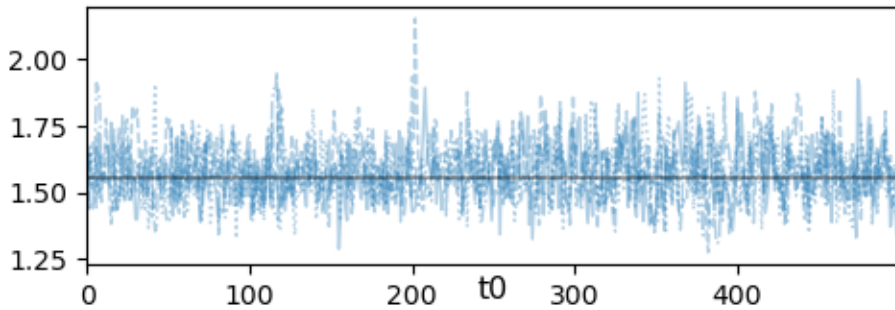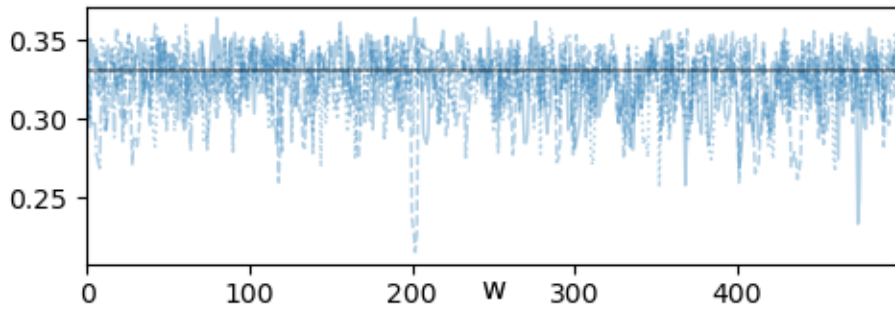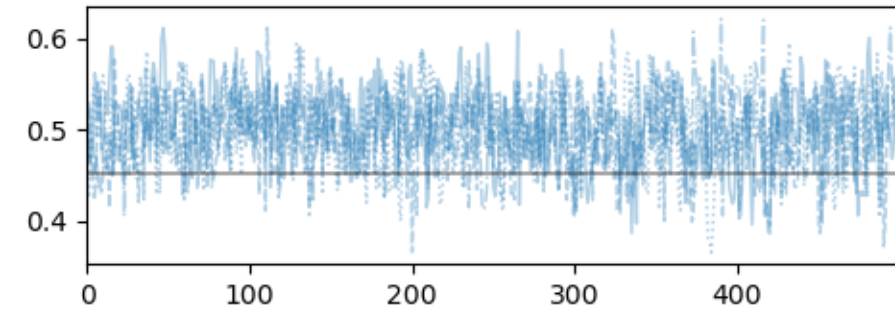

Supplement: supplementary_material [file attachment]

Likelihood density

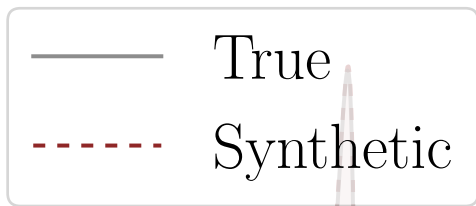

Response times (seconds)

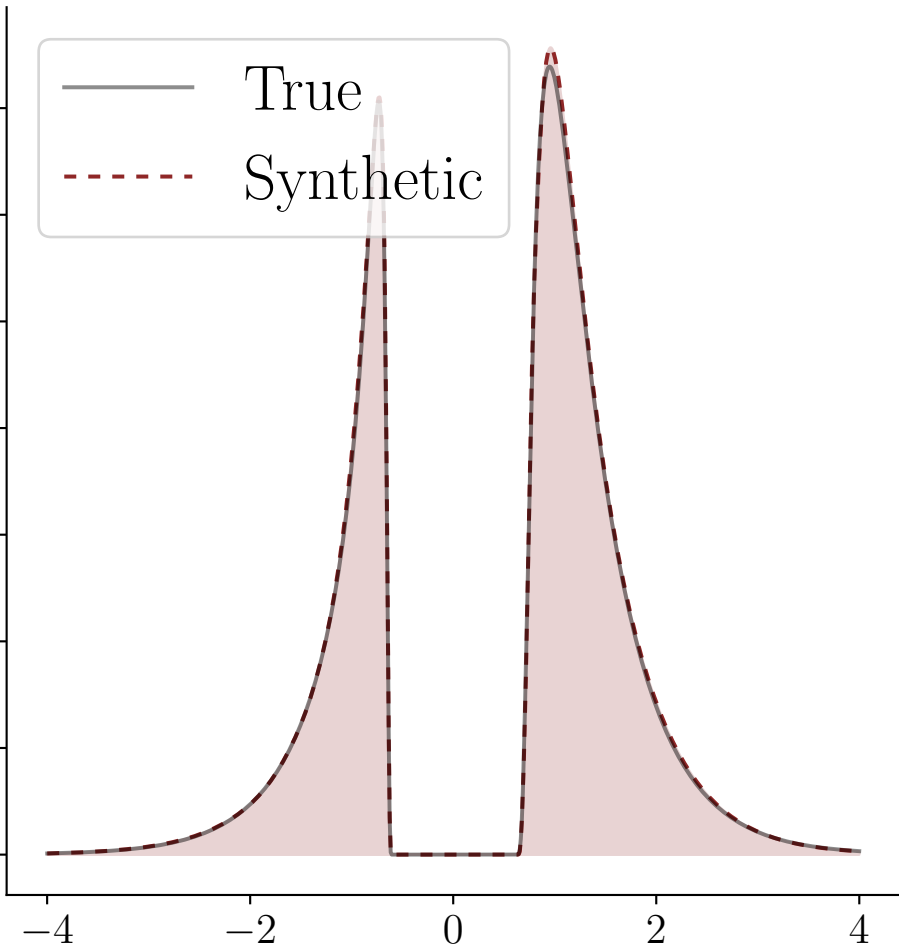

Supplement: supplementary_material [file attachment]

True

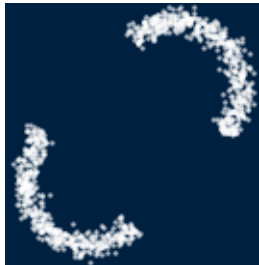

gSMC

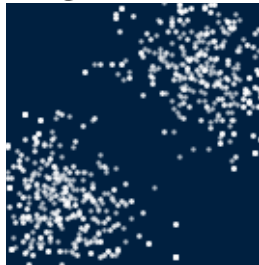

# NPE-C

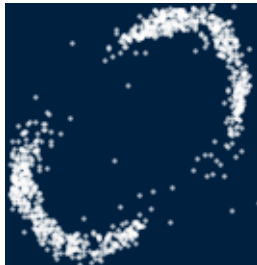

## SNRE-B

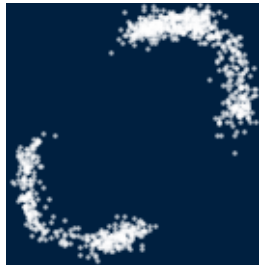

## SNPE-C

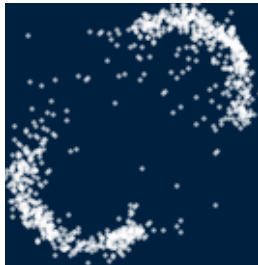

SNVI

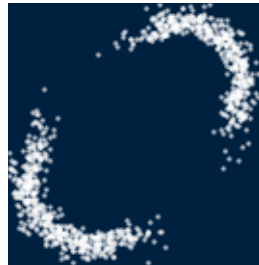

# SNPLA

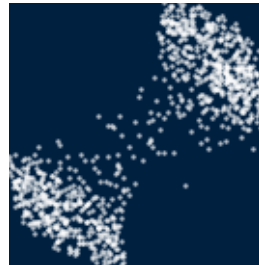

# JANA

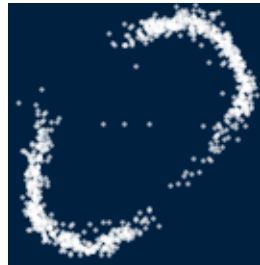
$$N = 2000$$
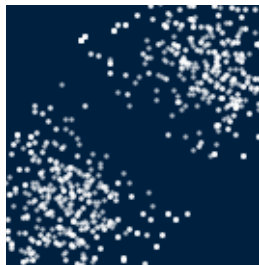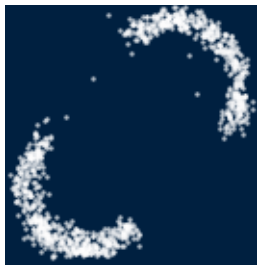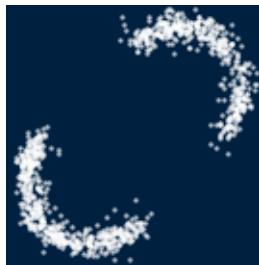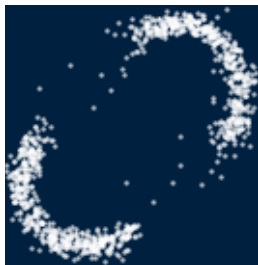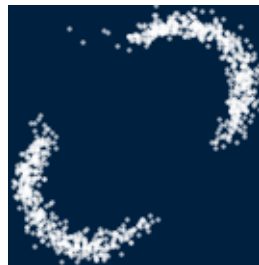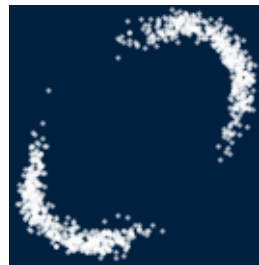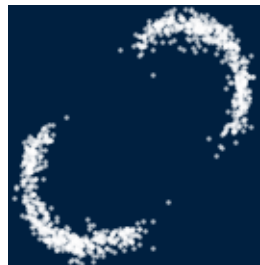
$$N = 6000$$
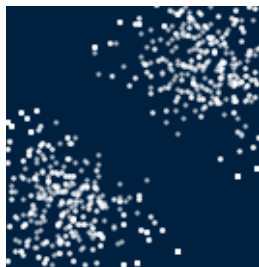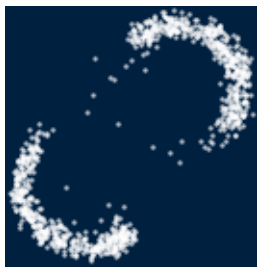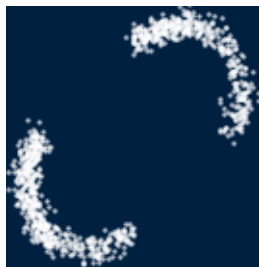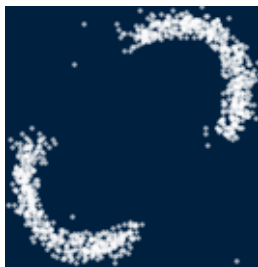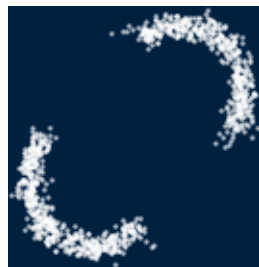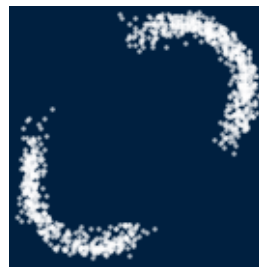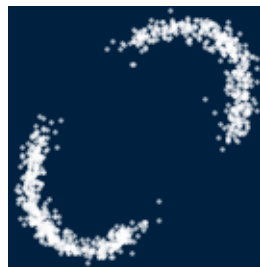
$$V = 10000$$

Supplement: supplementary_material [file attachment]

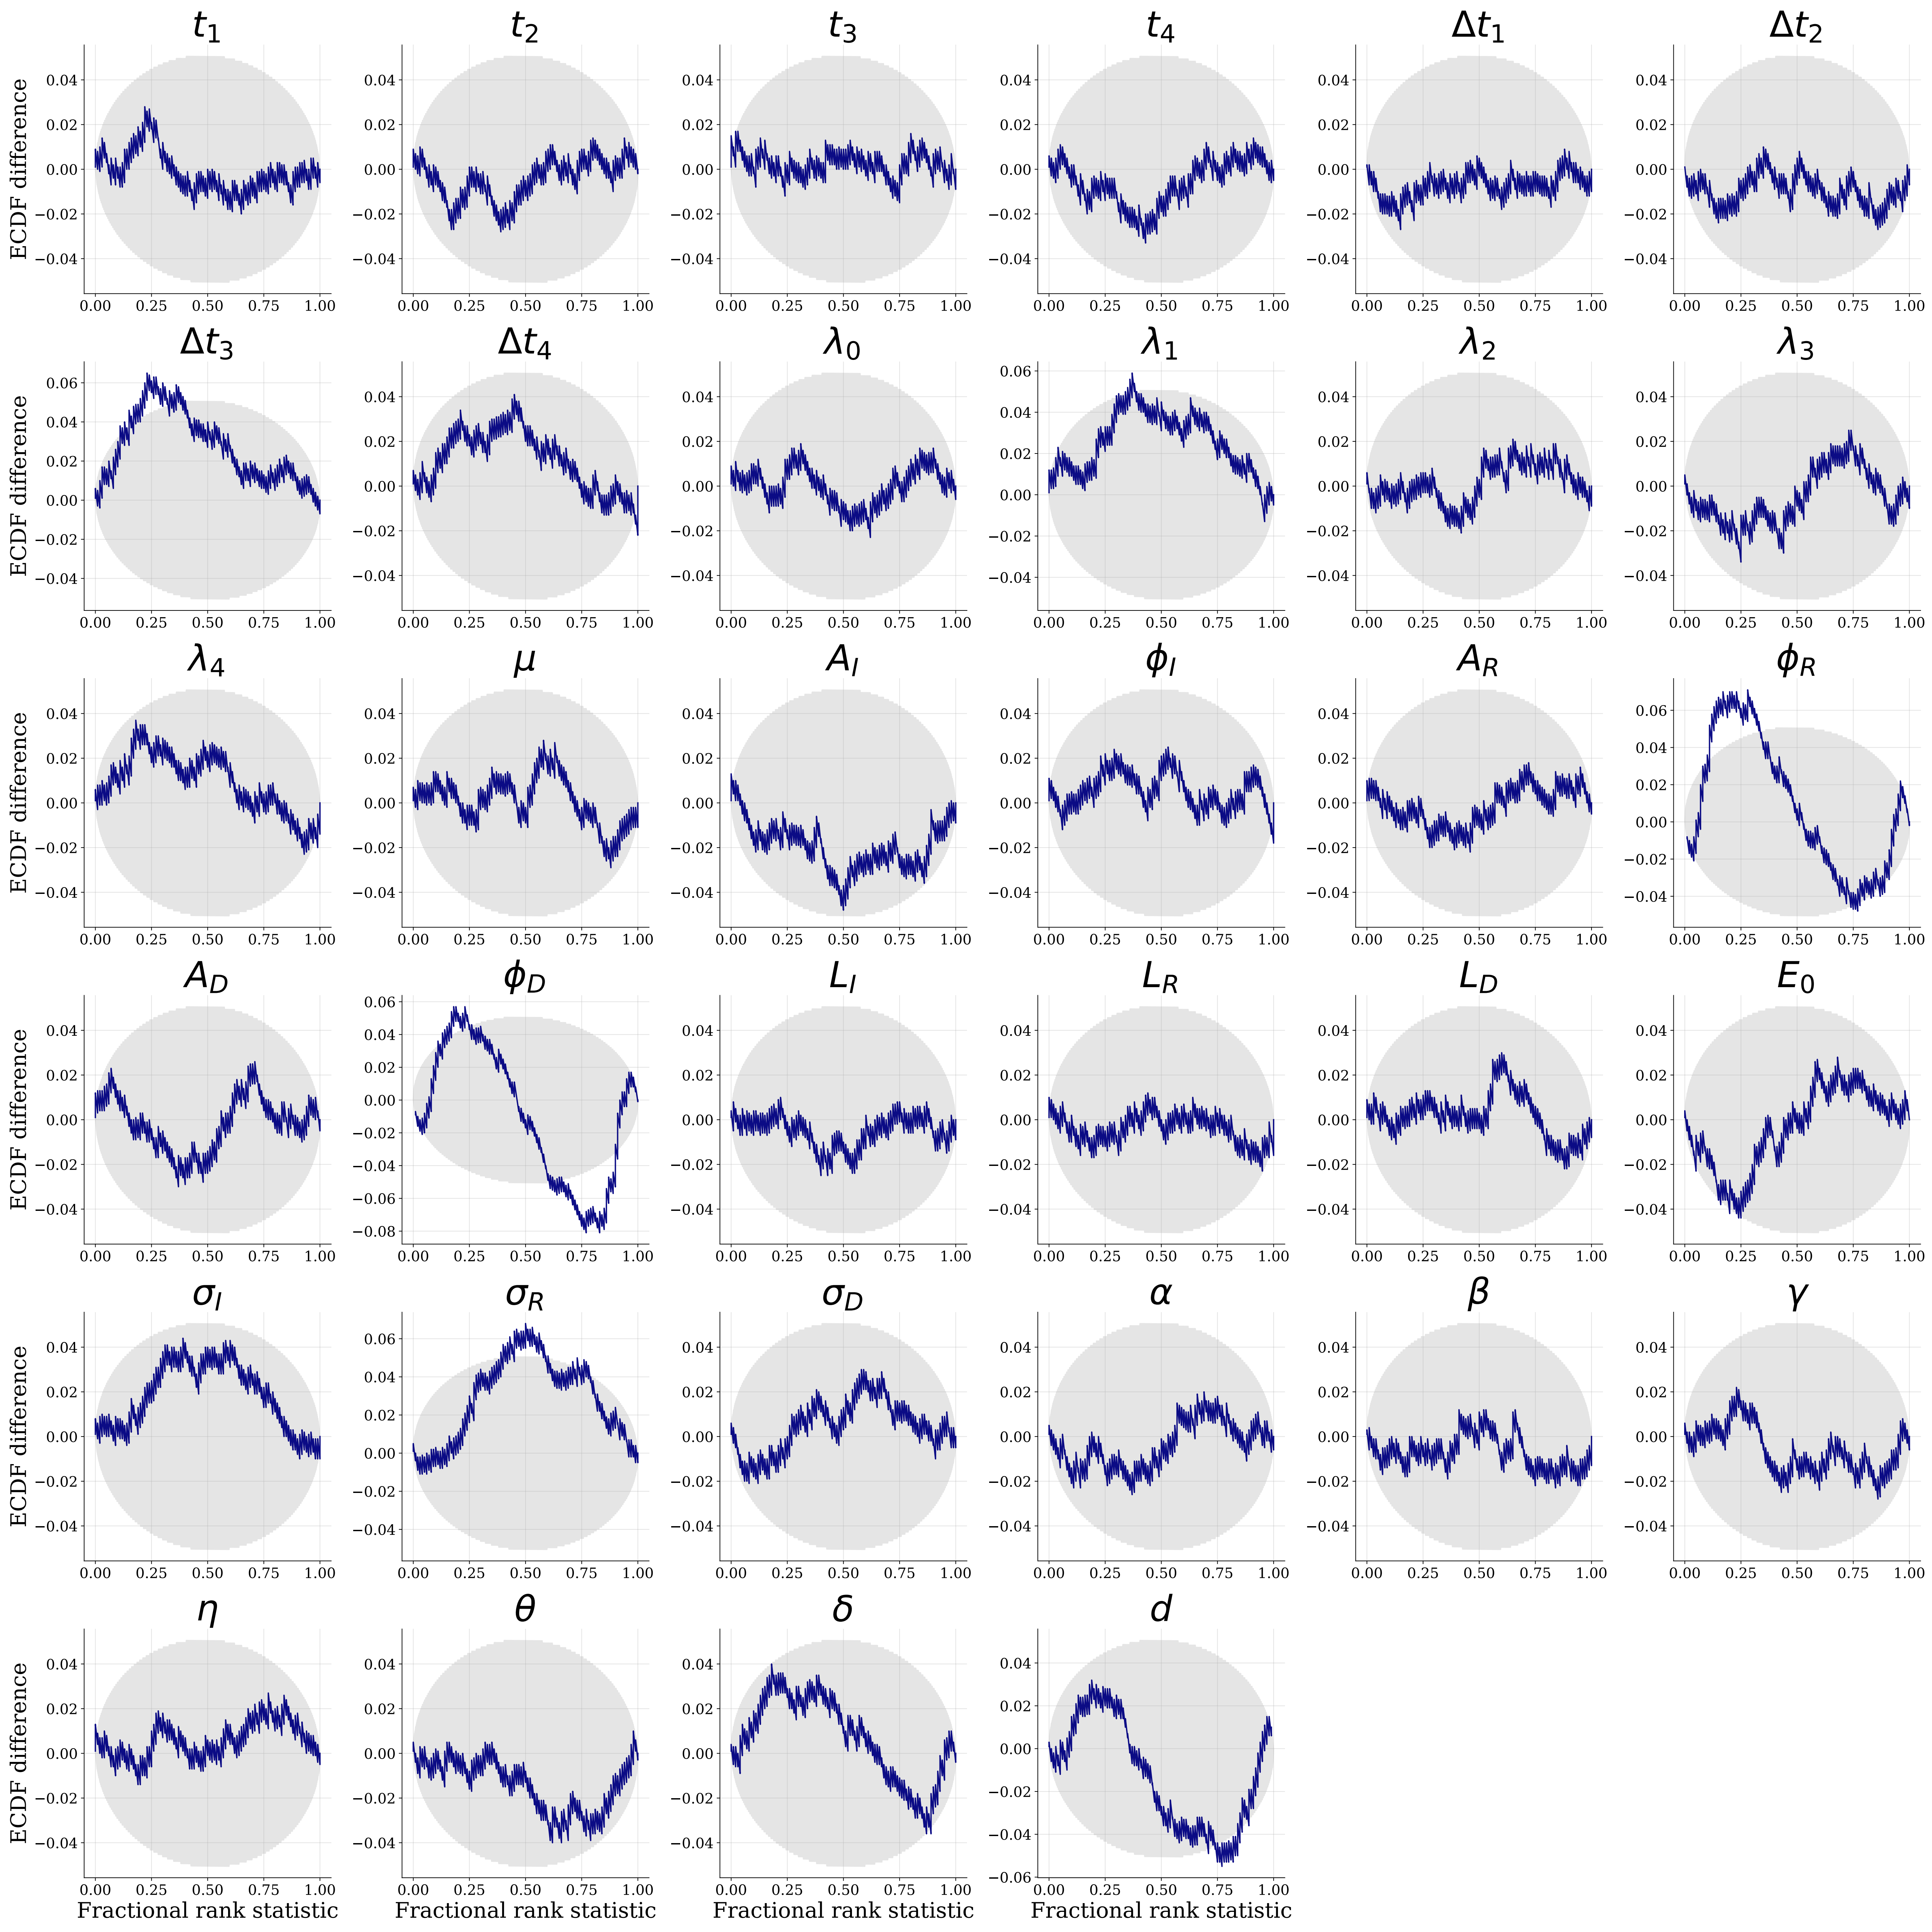

Supplement: supplementary_material [file attachment]

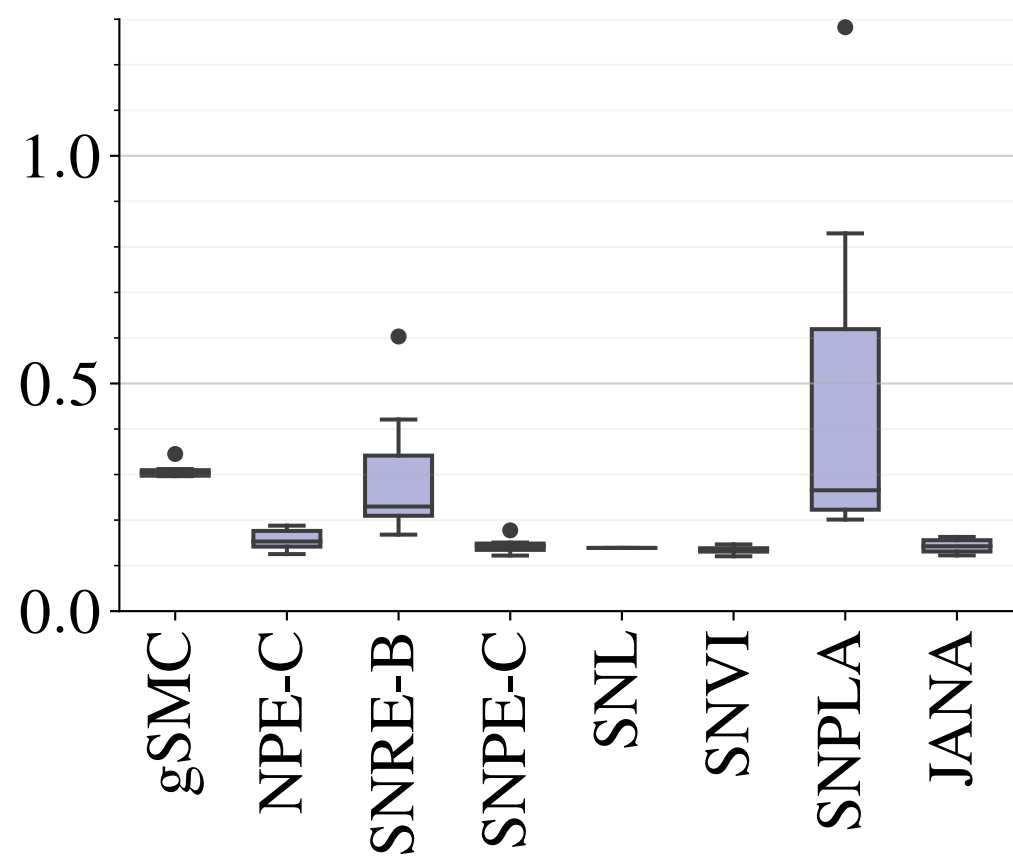

Supplement: supplementary_material [file attachment]

ECDF difference

$\alpha$

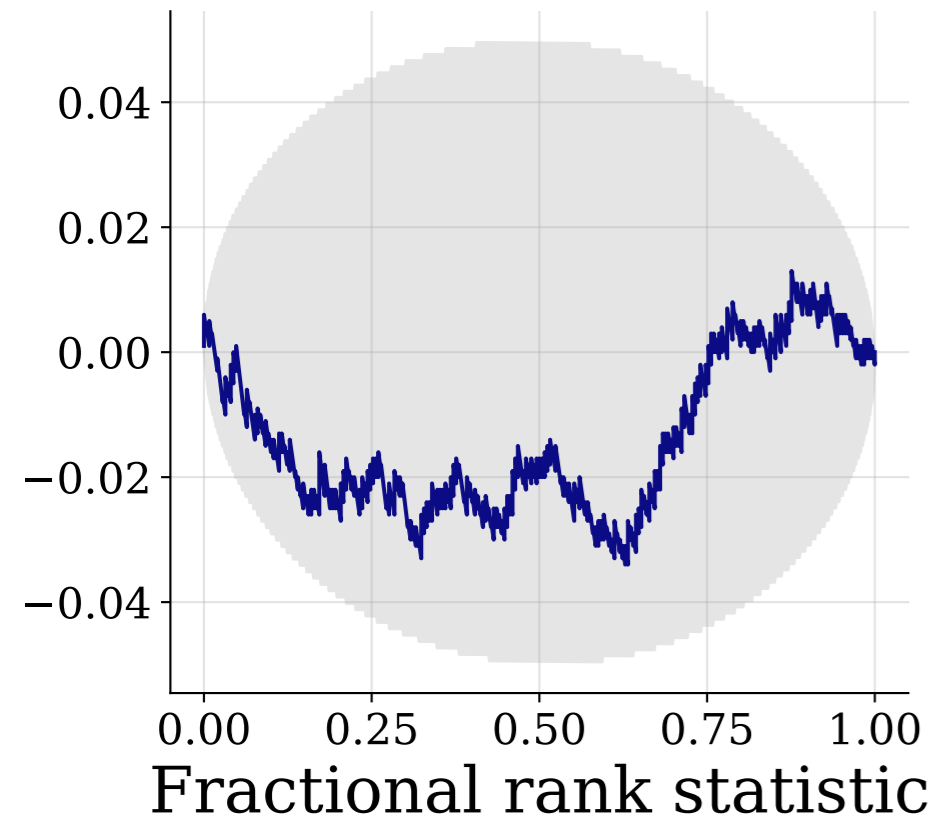

$\beta$

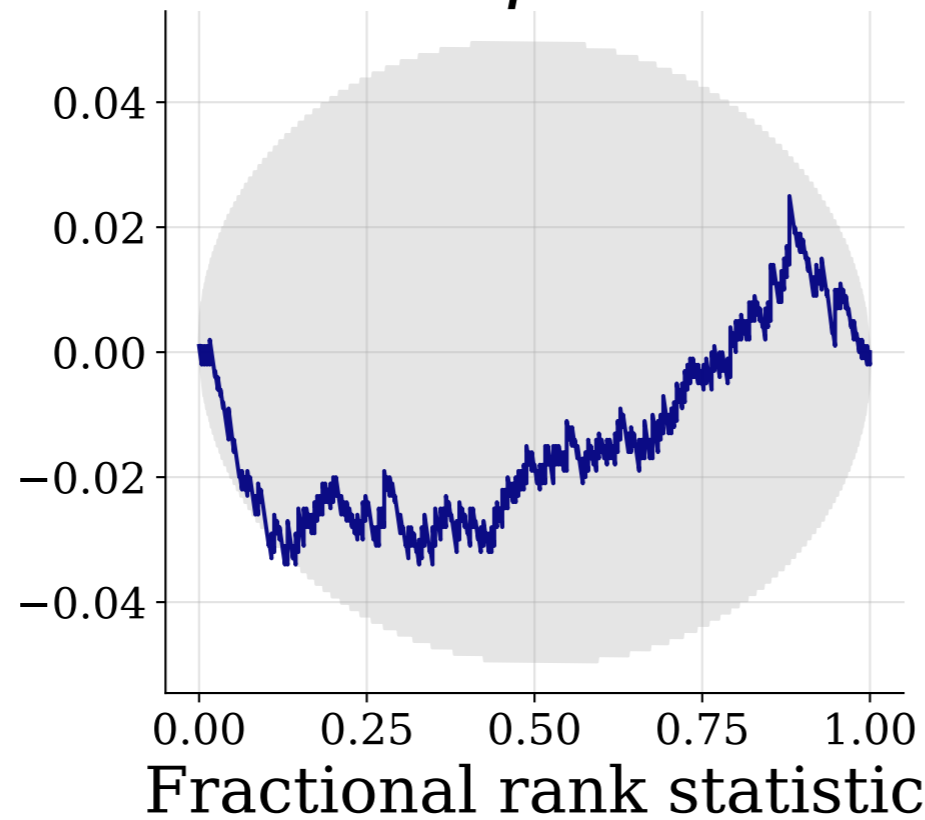

$\gamma$

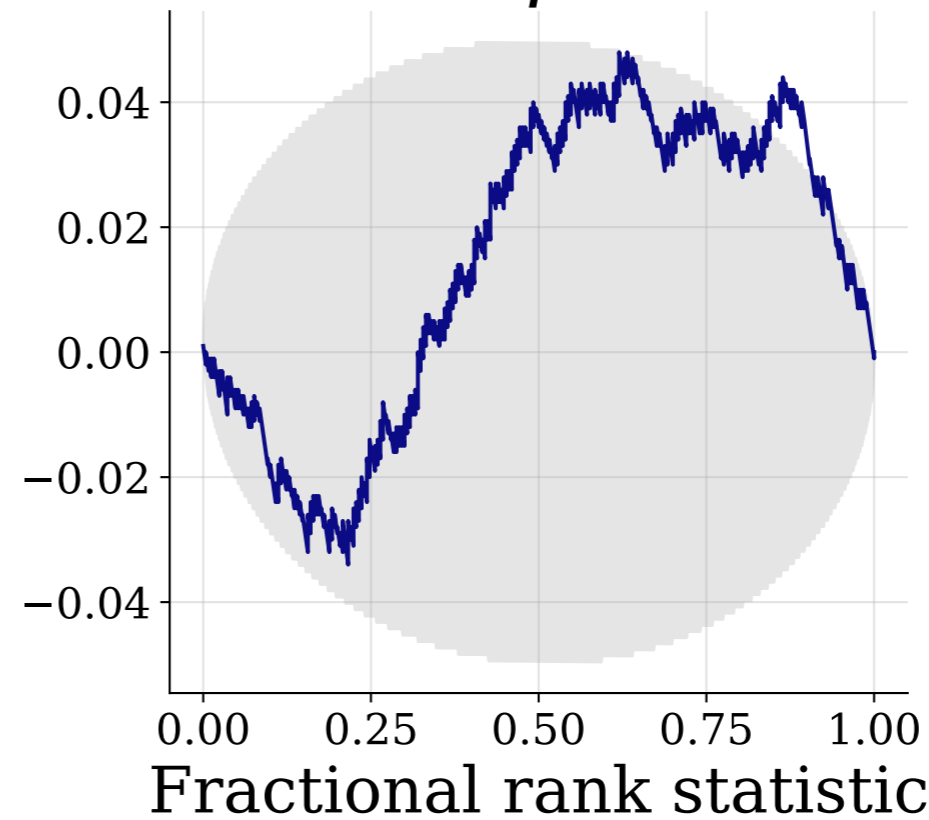

$\delta$

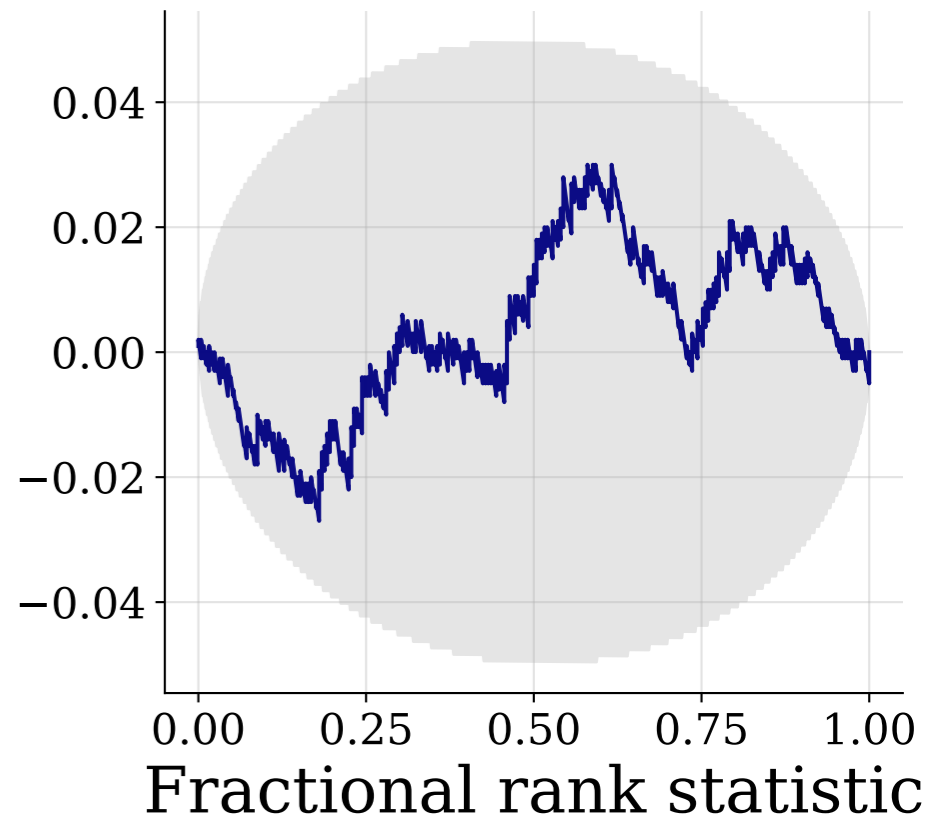

Supplement: supplementary_material [file attachment]

True

gSMC

NPE-C

SNRE-B

SNPE-C

SNVI

SNPLA

JANA

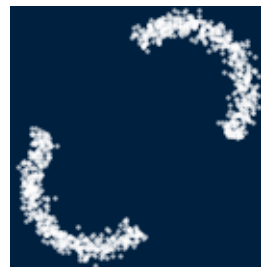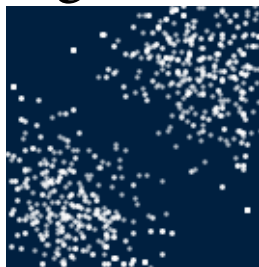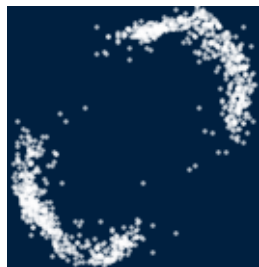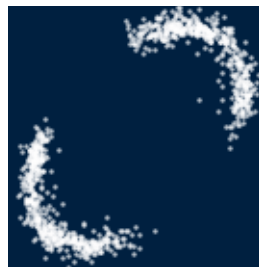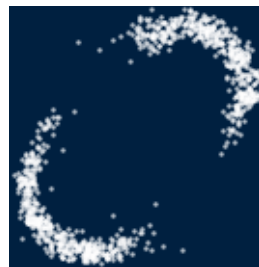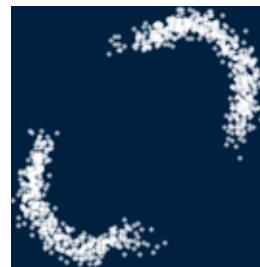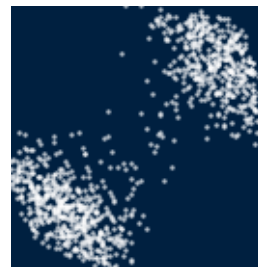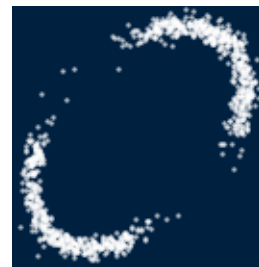 $N = 2000$ 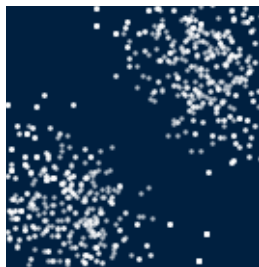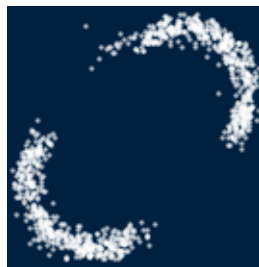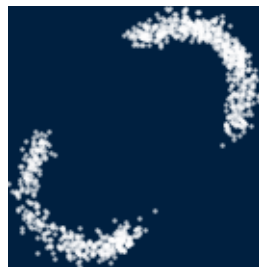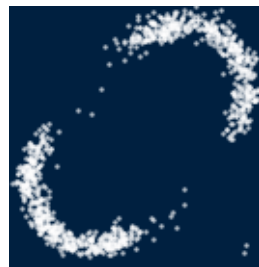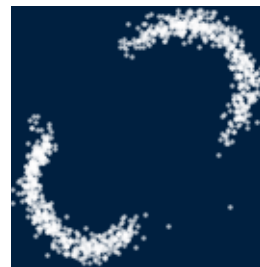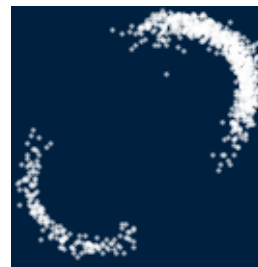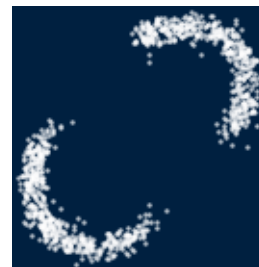 $N = 6000$ 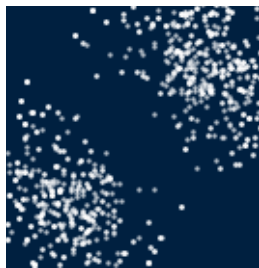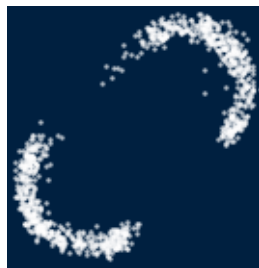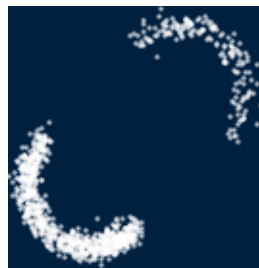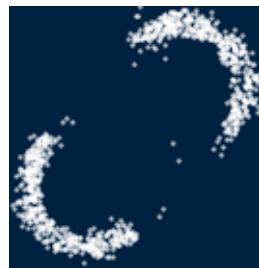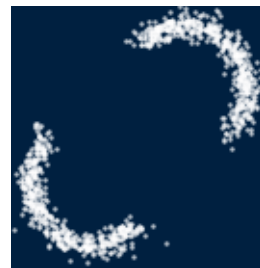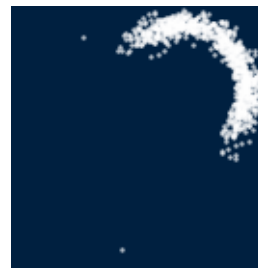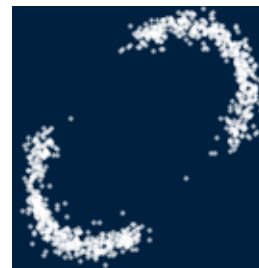 $N = 10000$

Supplement: supplementary_material [file attachment]

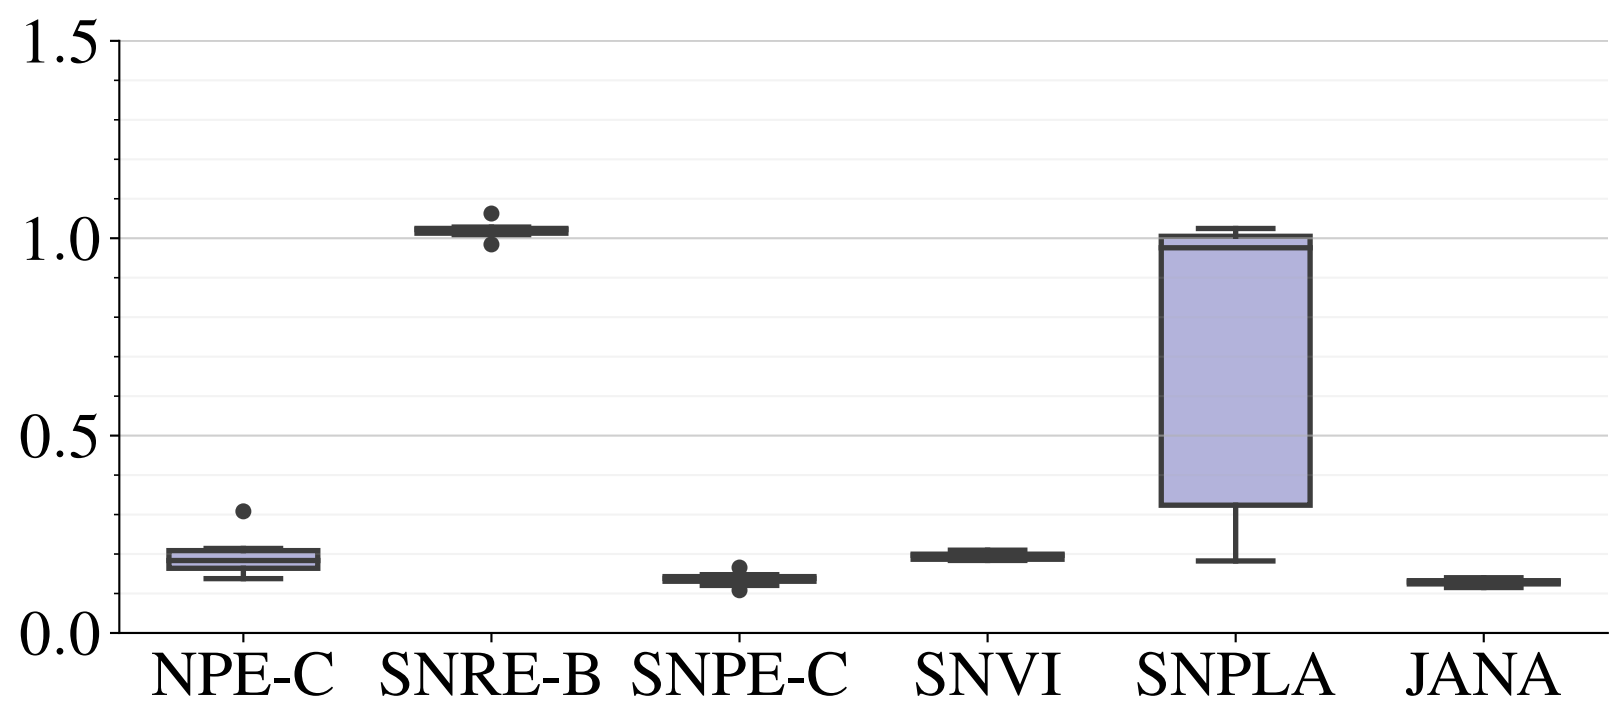

Supplement: supplementary_material [file attachment]

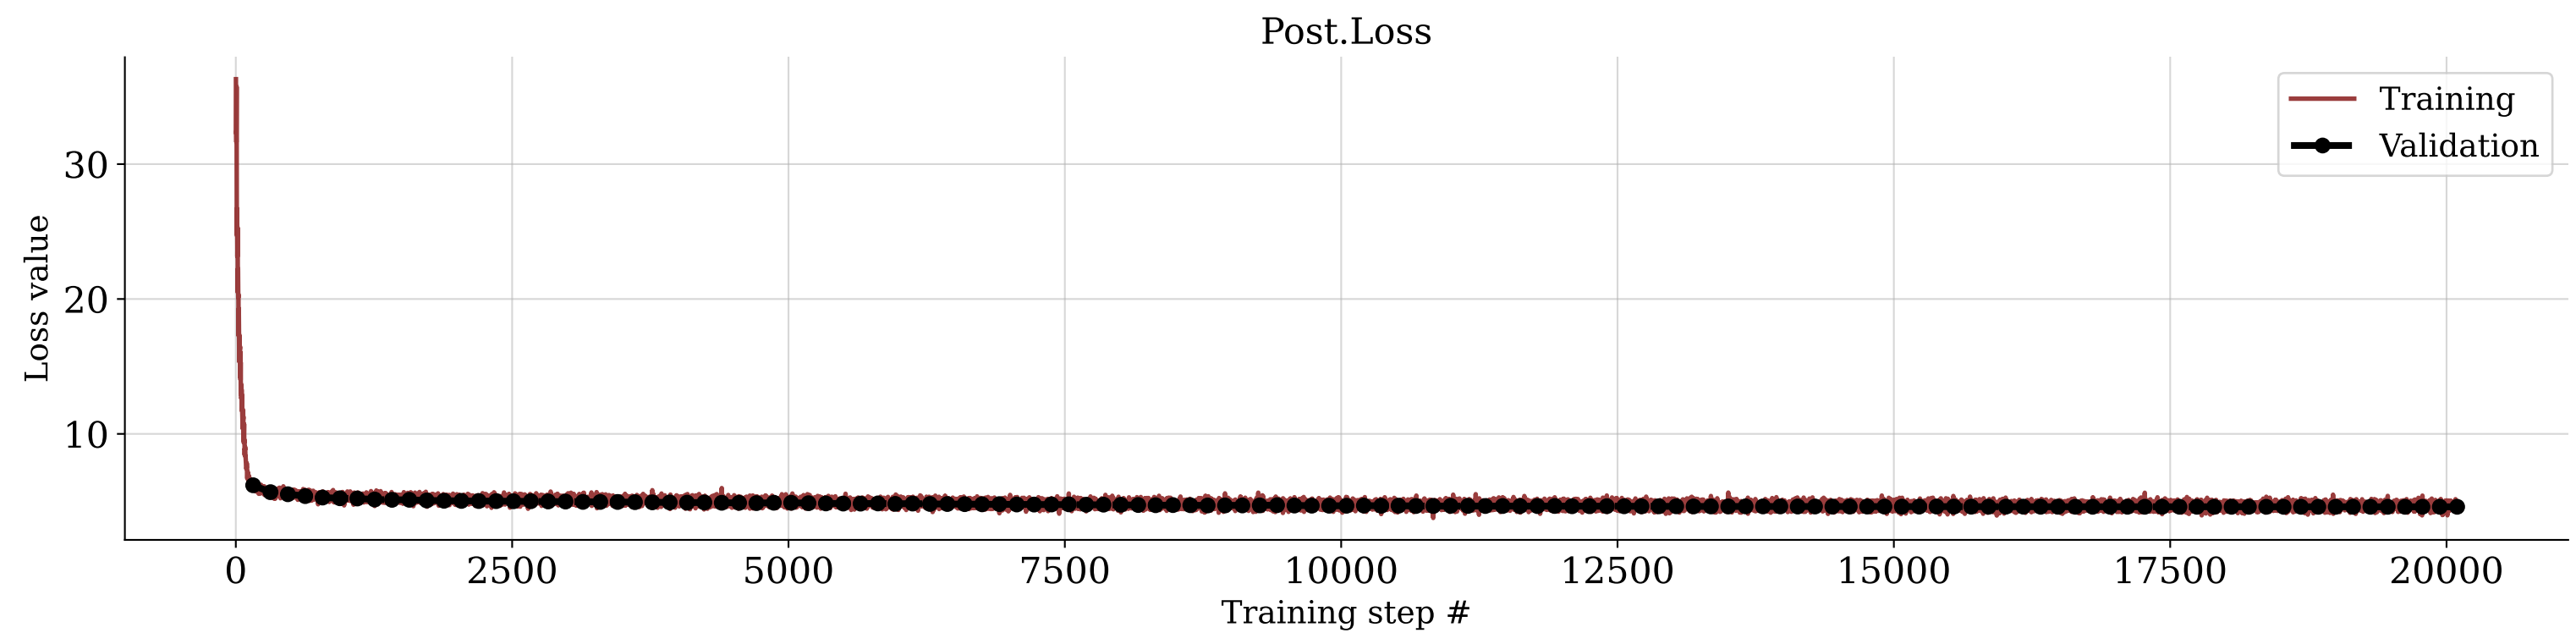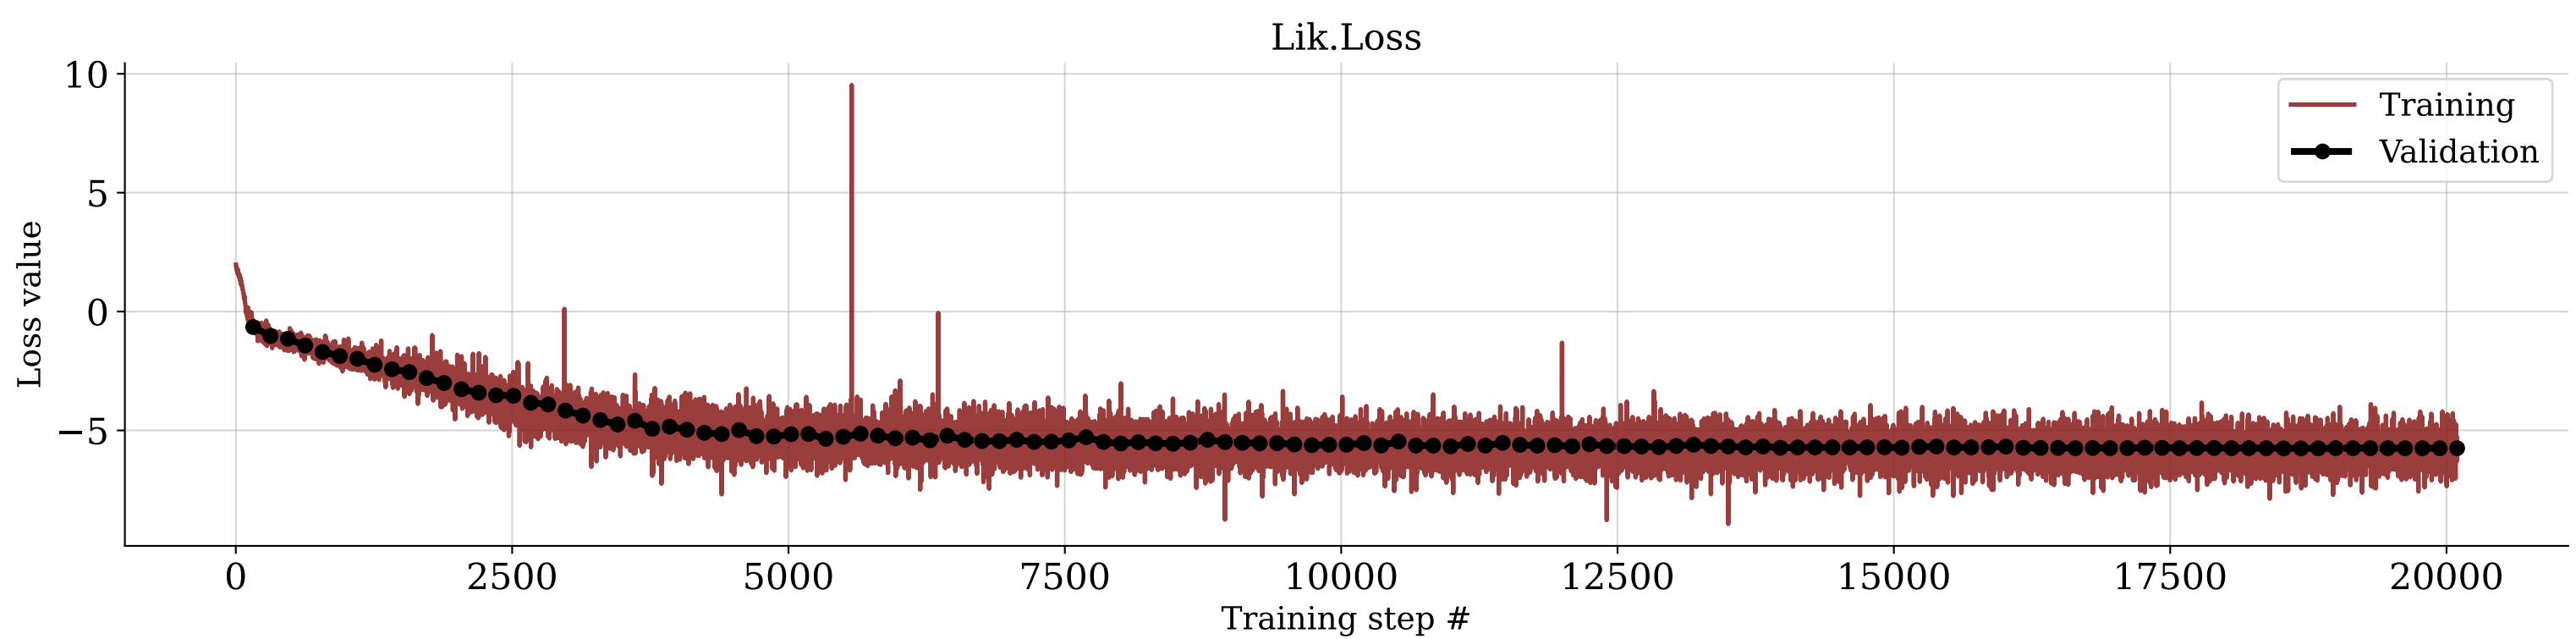

Supplement: supplementary_material [file attachment]

ECDF difference

$\beta$

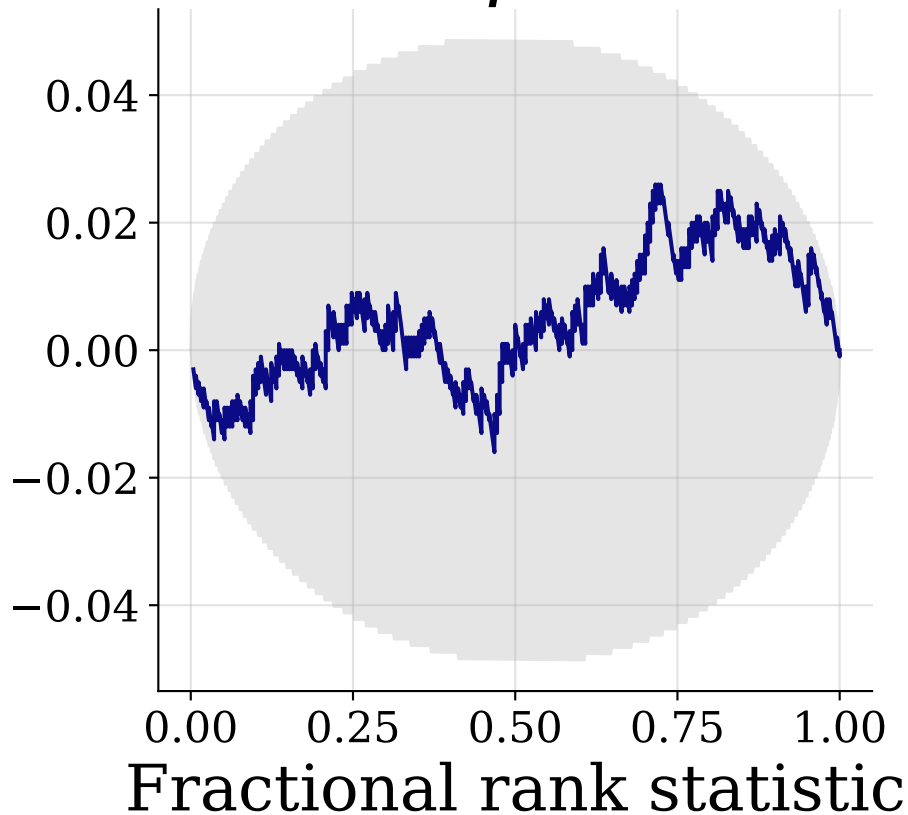

$\gamma$

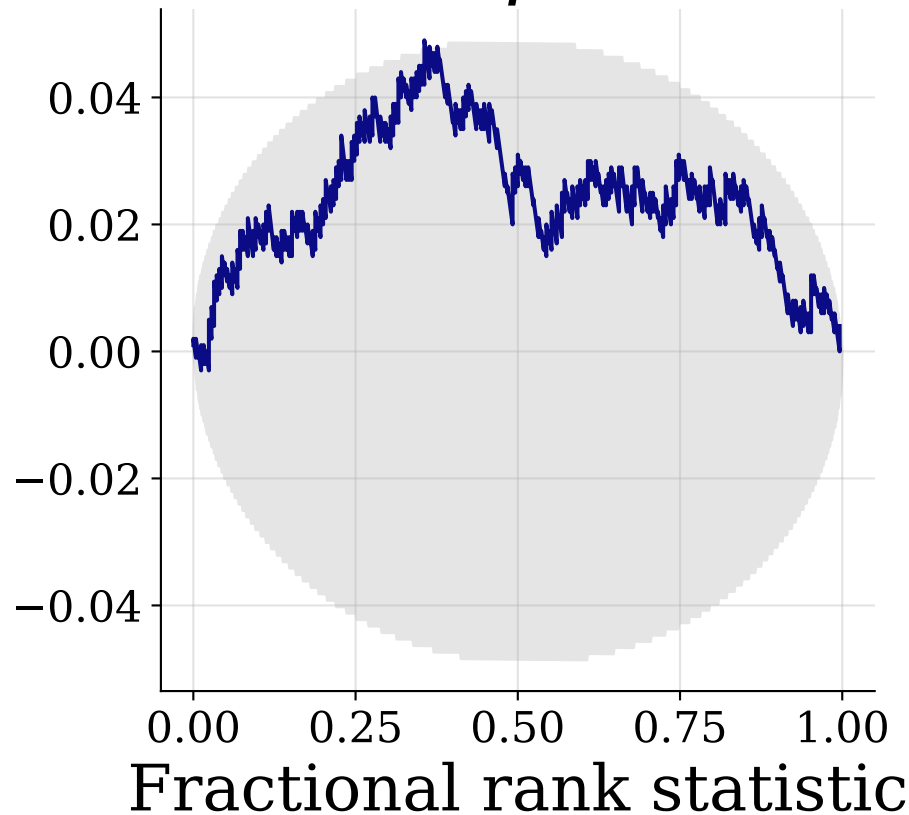

Supplement: supplementary_material [file attachment]

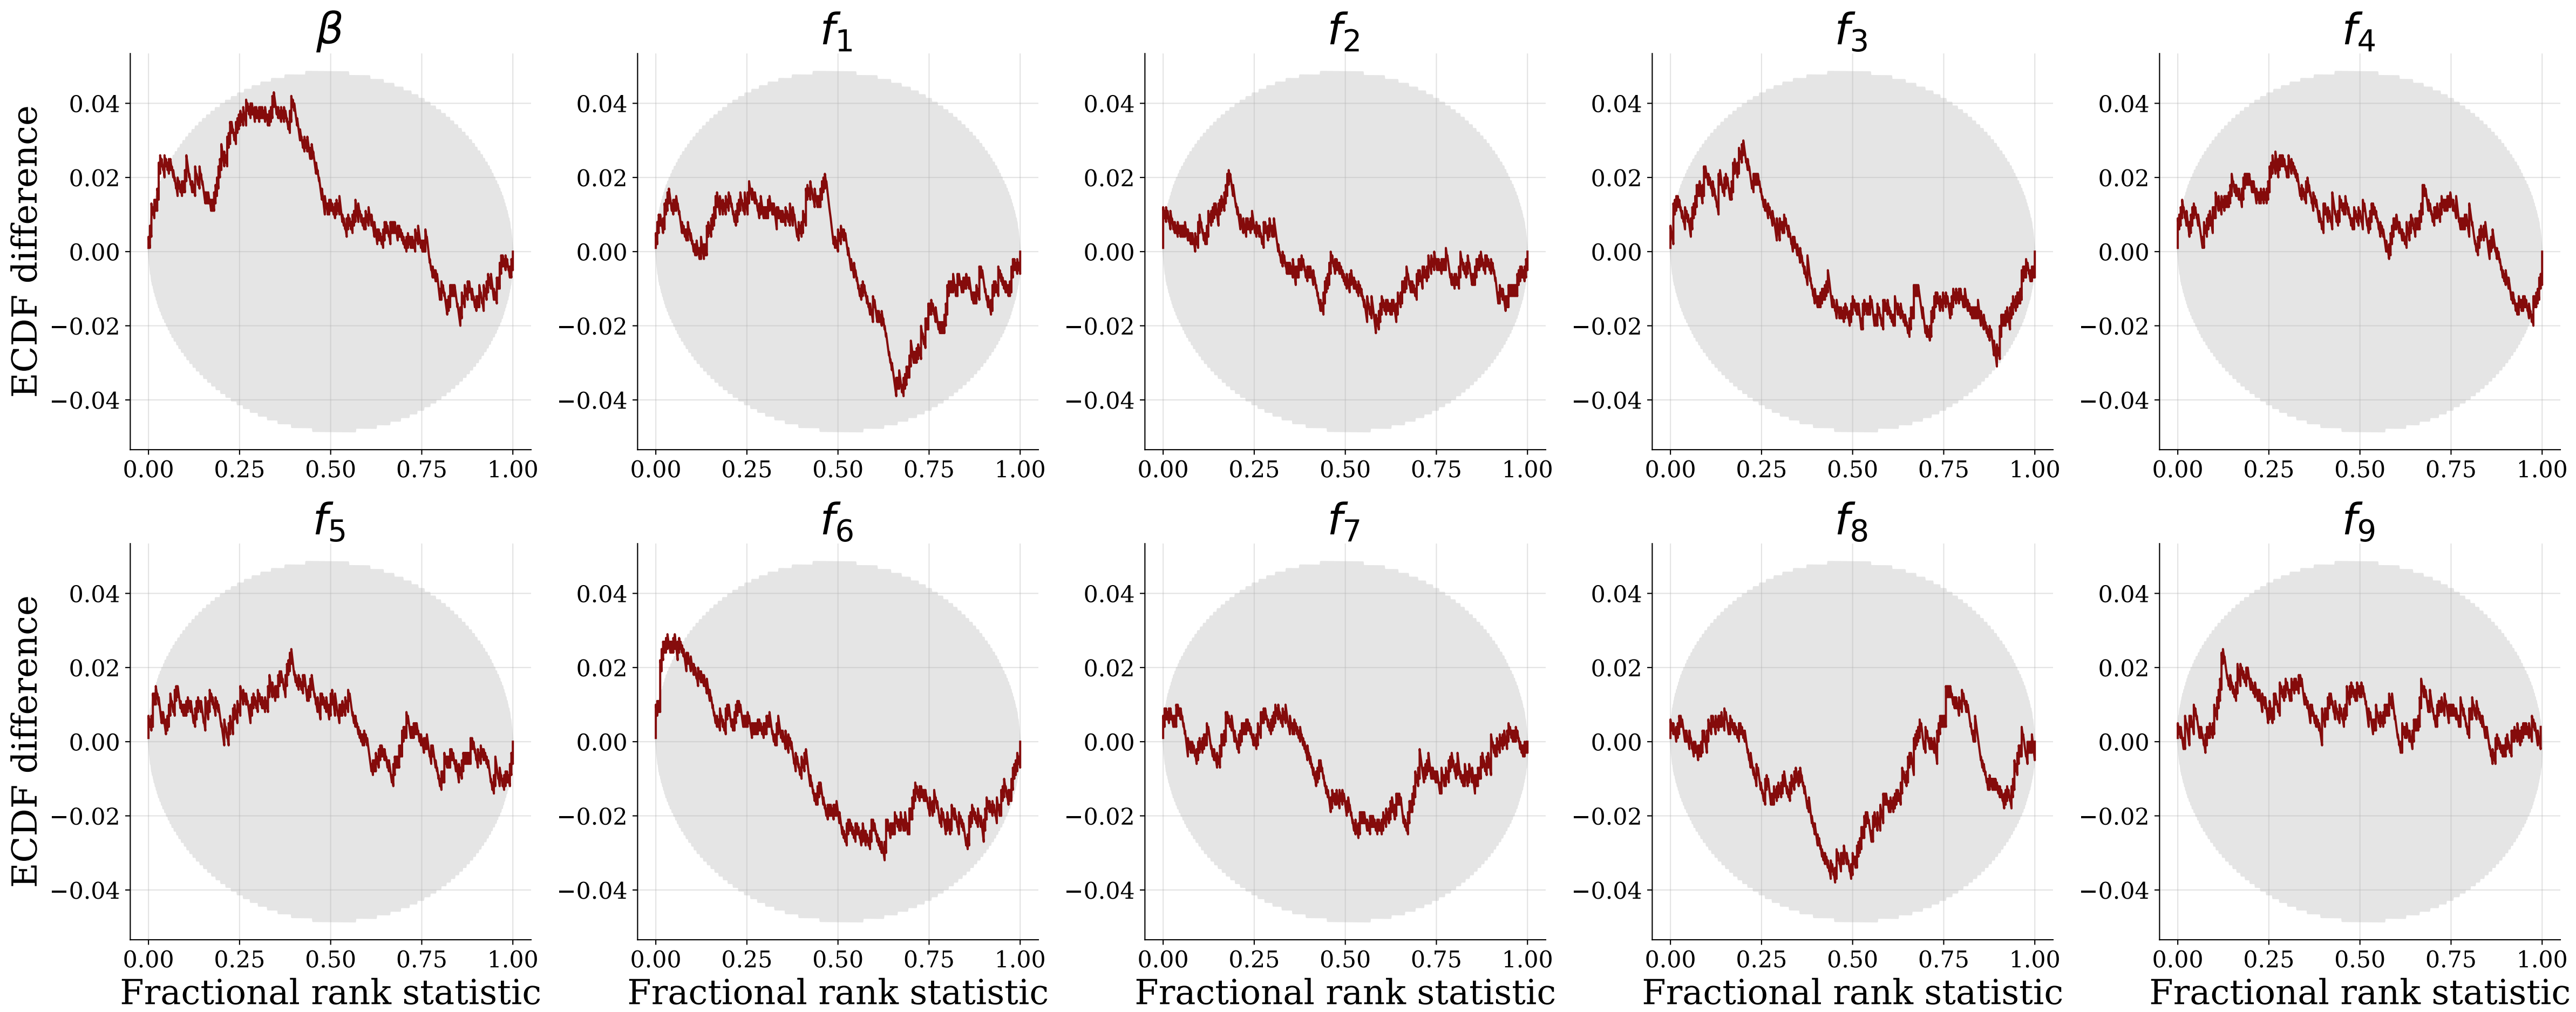

Supplement: supplementary_material [file attachment]

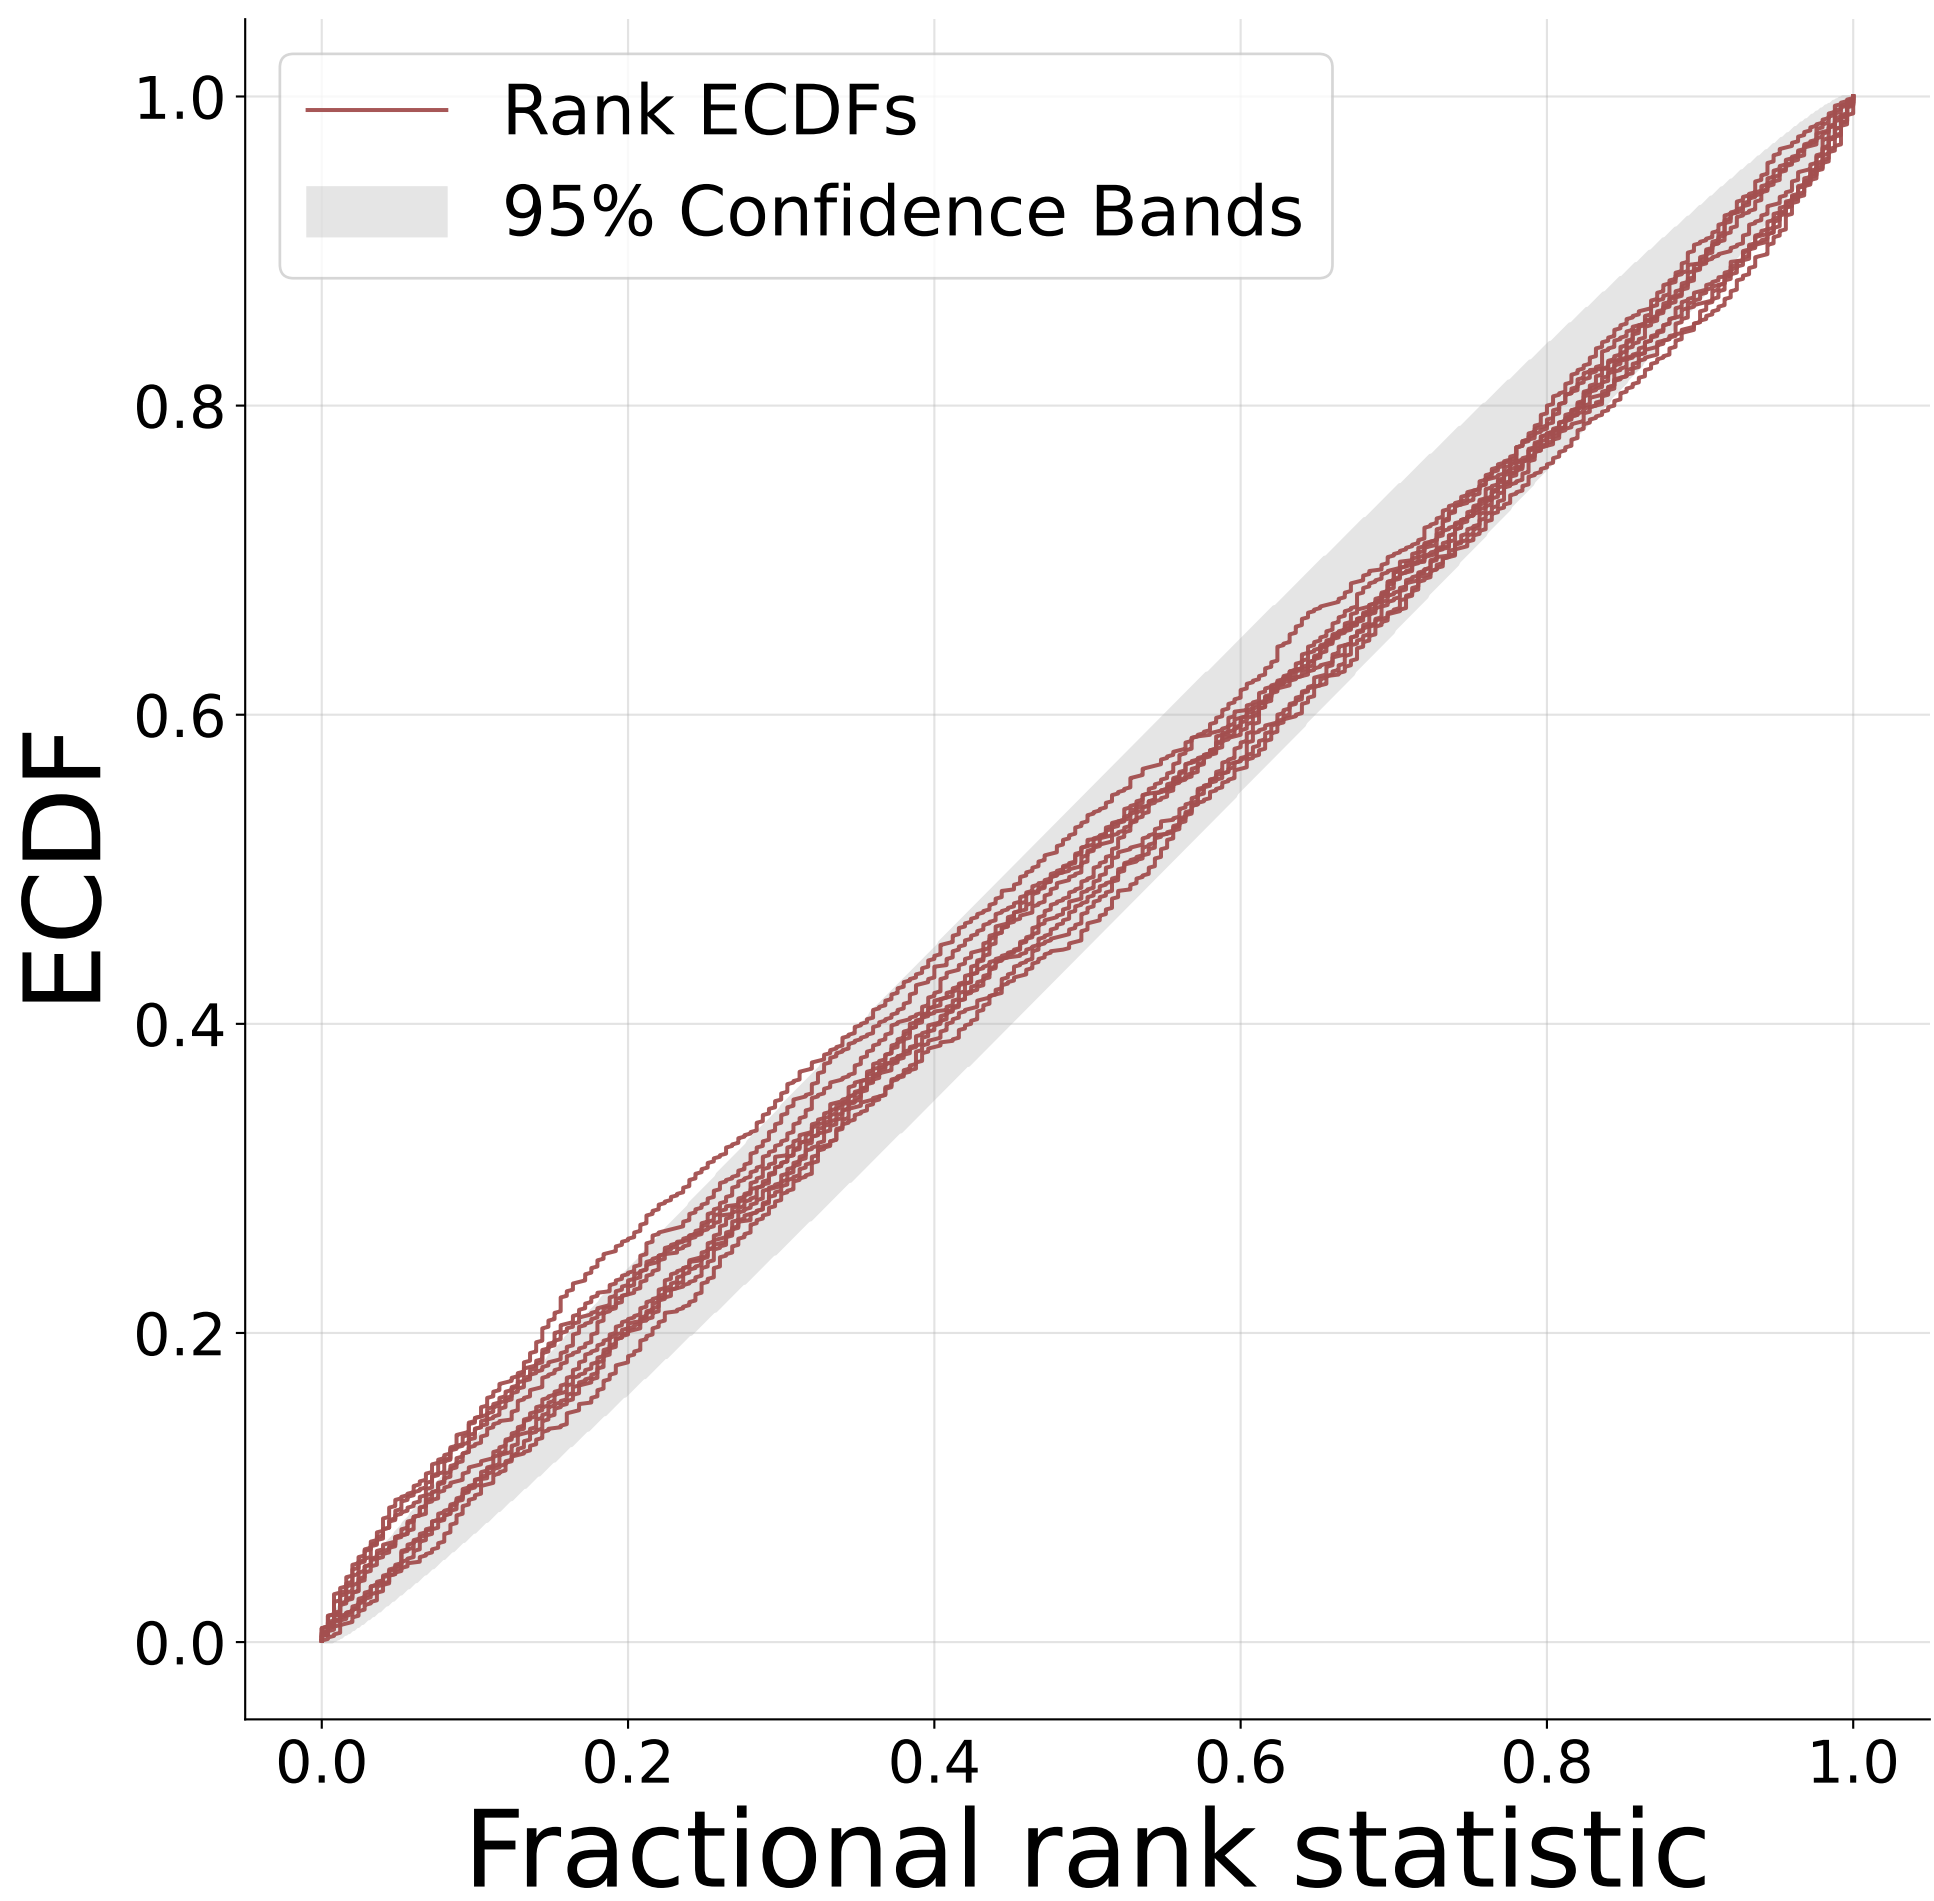

Supplement: supplementary_material [file attachment]

# Simulator

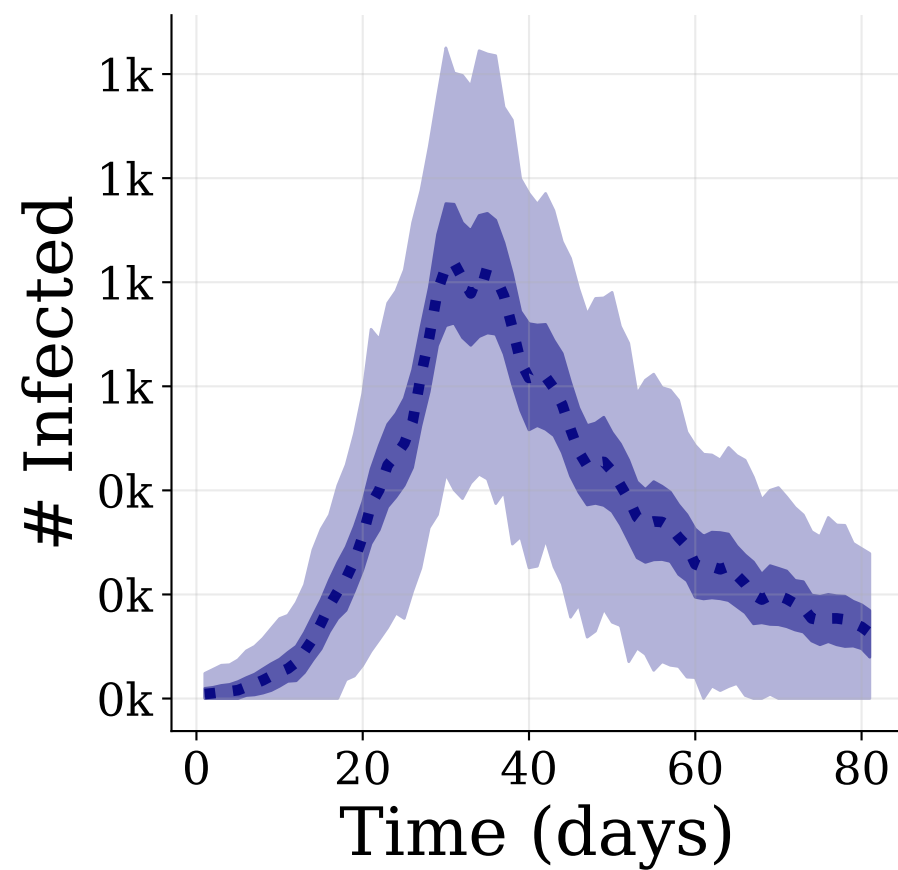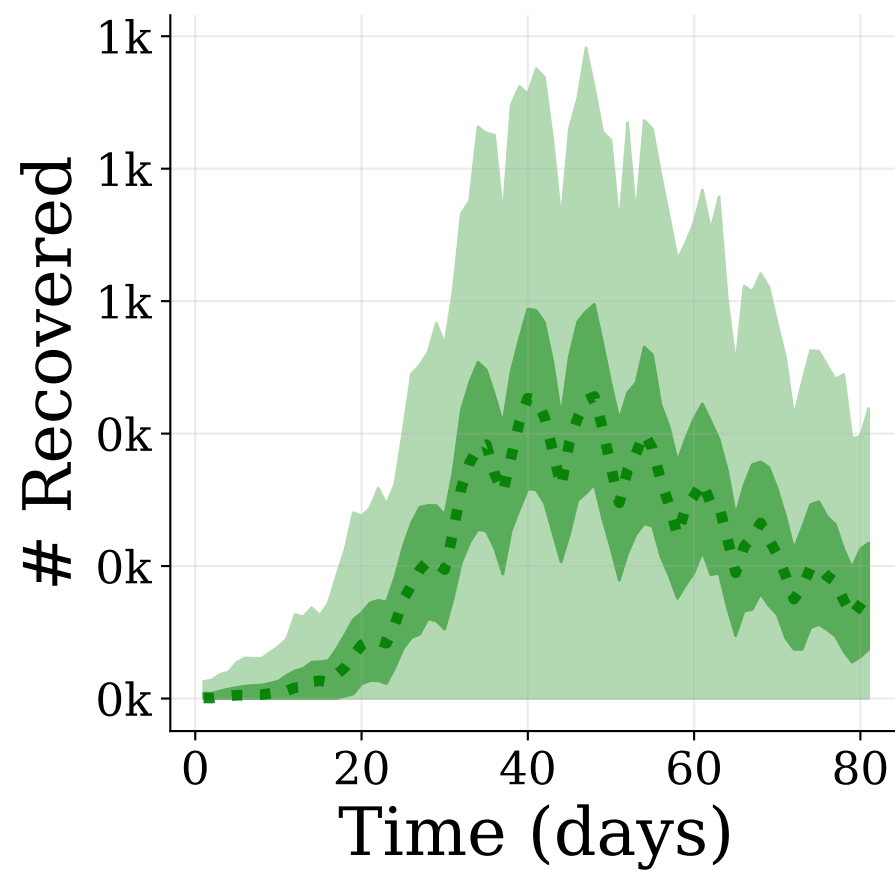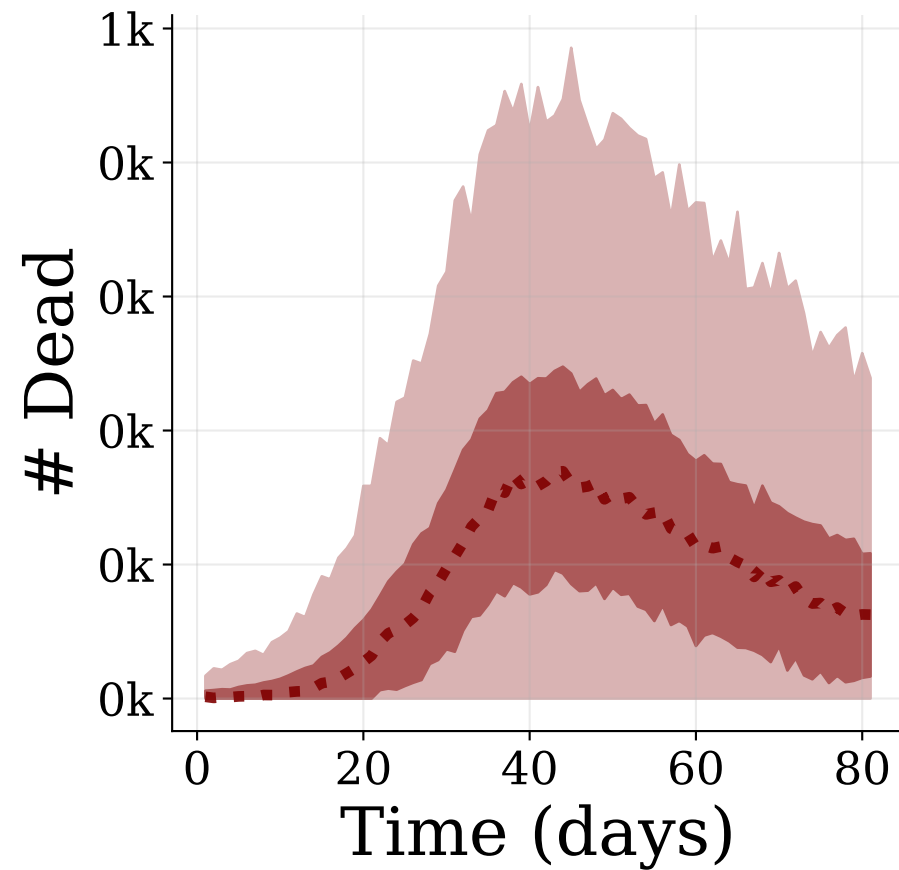

Supplement: supplementary_material [file attachment]

True

gSMC

NPE-C

SNRE-B

SNPE-C

SNVI

SNPLA

JANA

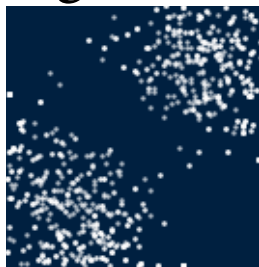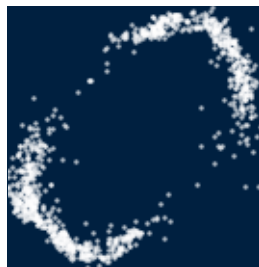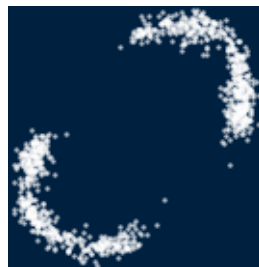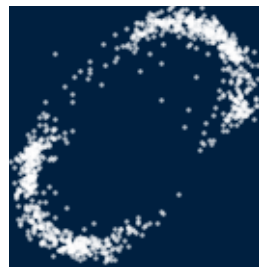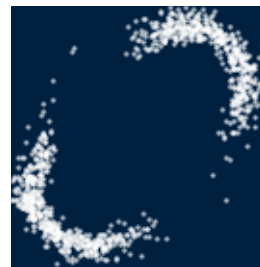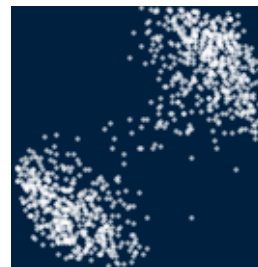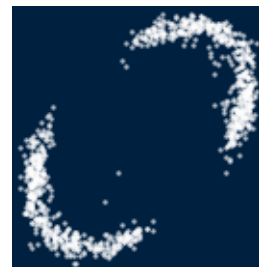 $N = 2000$ 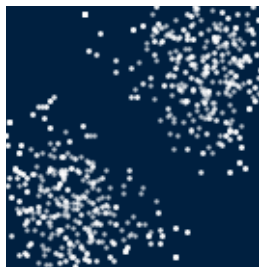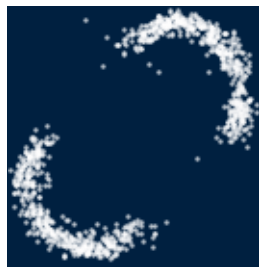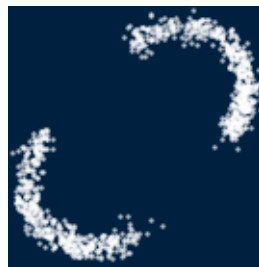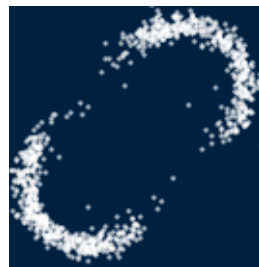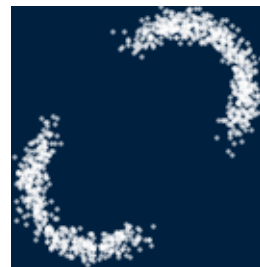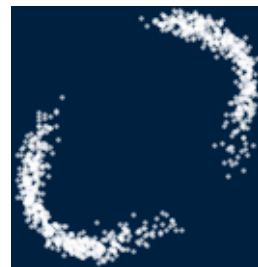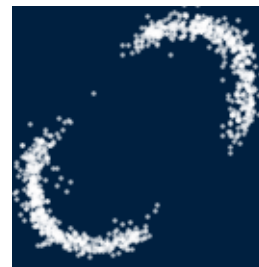 $N = 6000$ 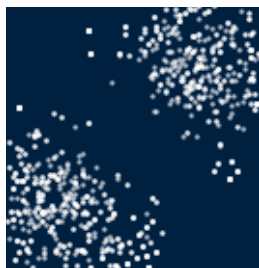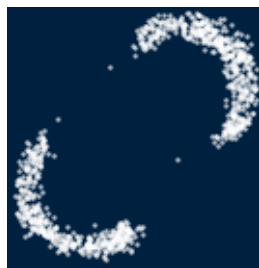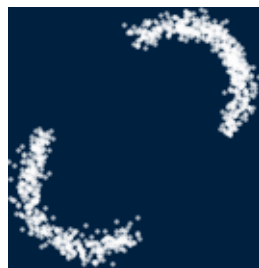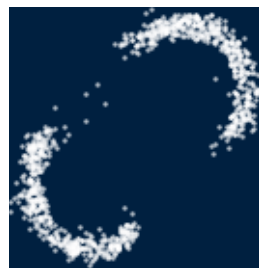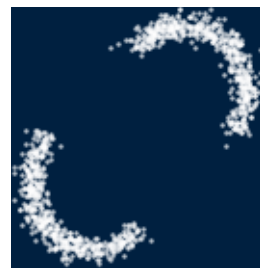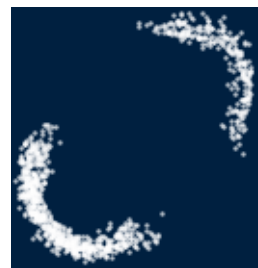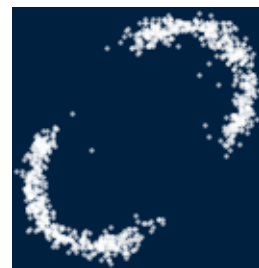 $N = 10000$

Supplement: supplementary_material [file attachment]

ECDF difference

$\mu_1$

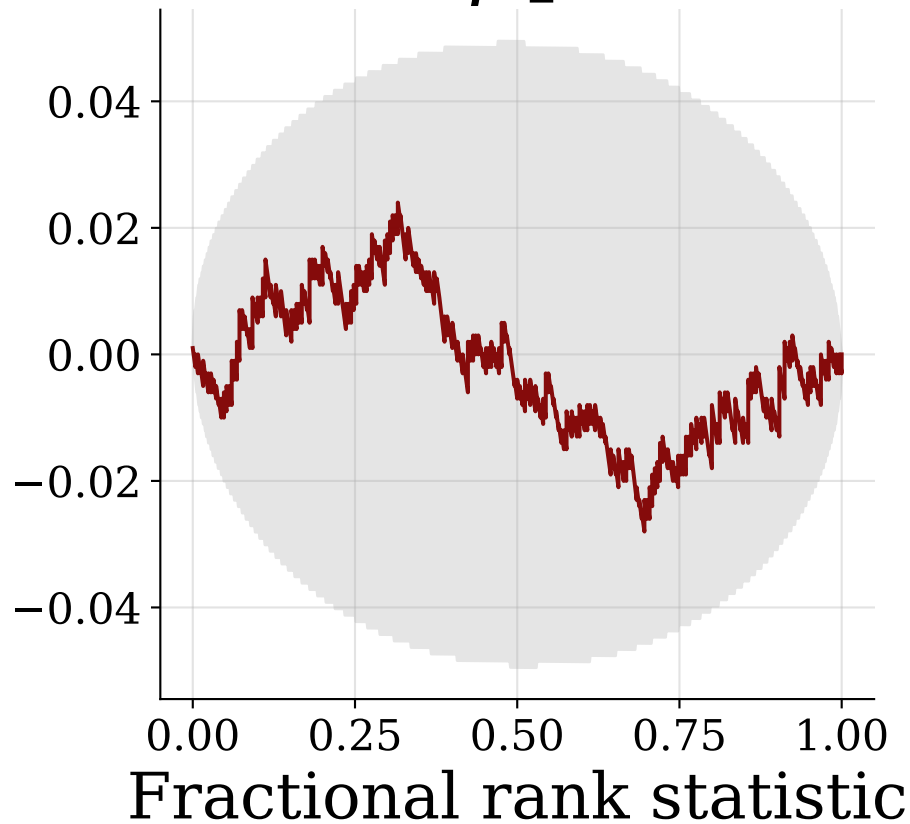

$\mu_2$

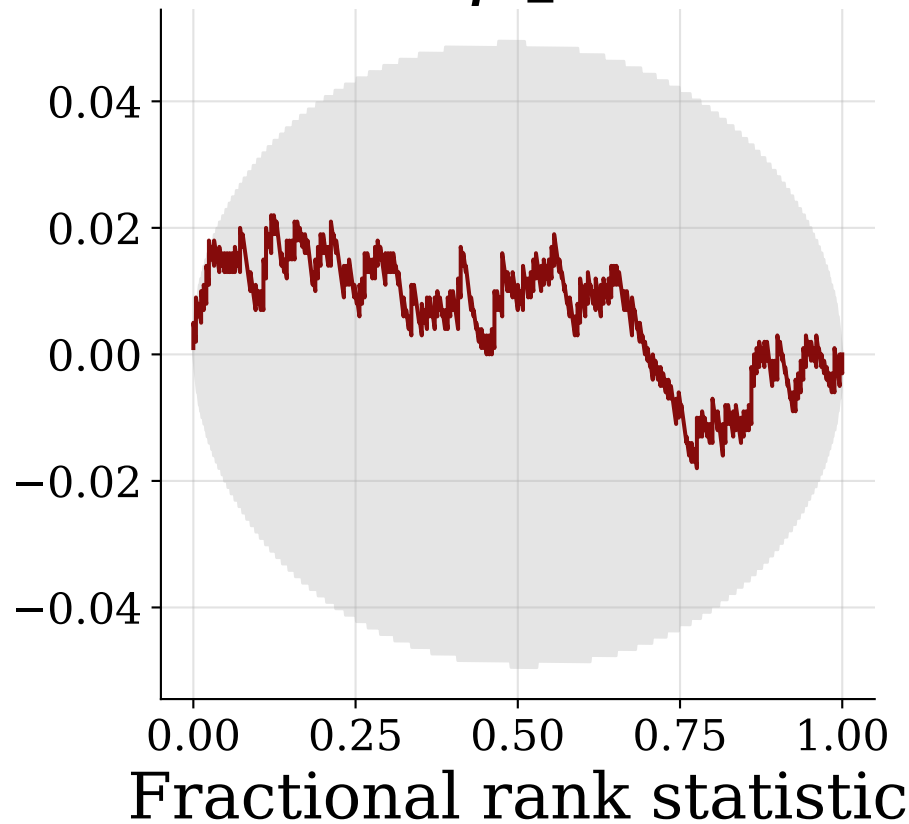

Supplement: supplementary_material [file attachment]

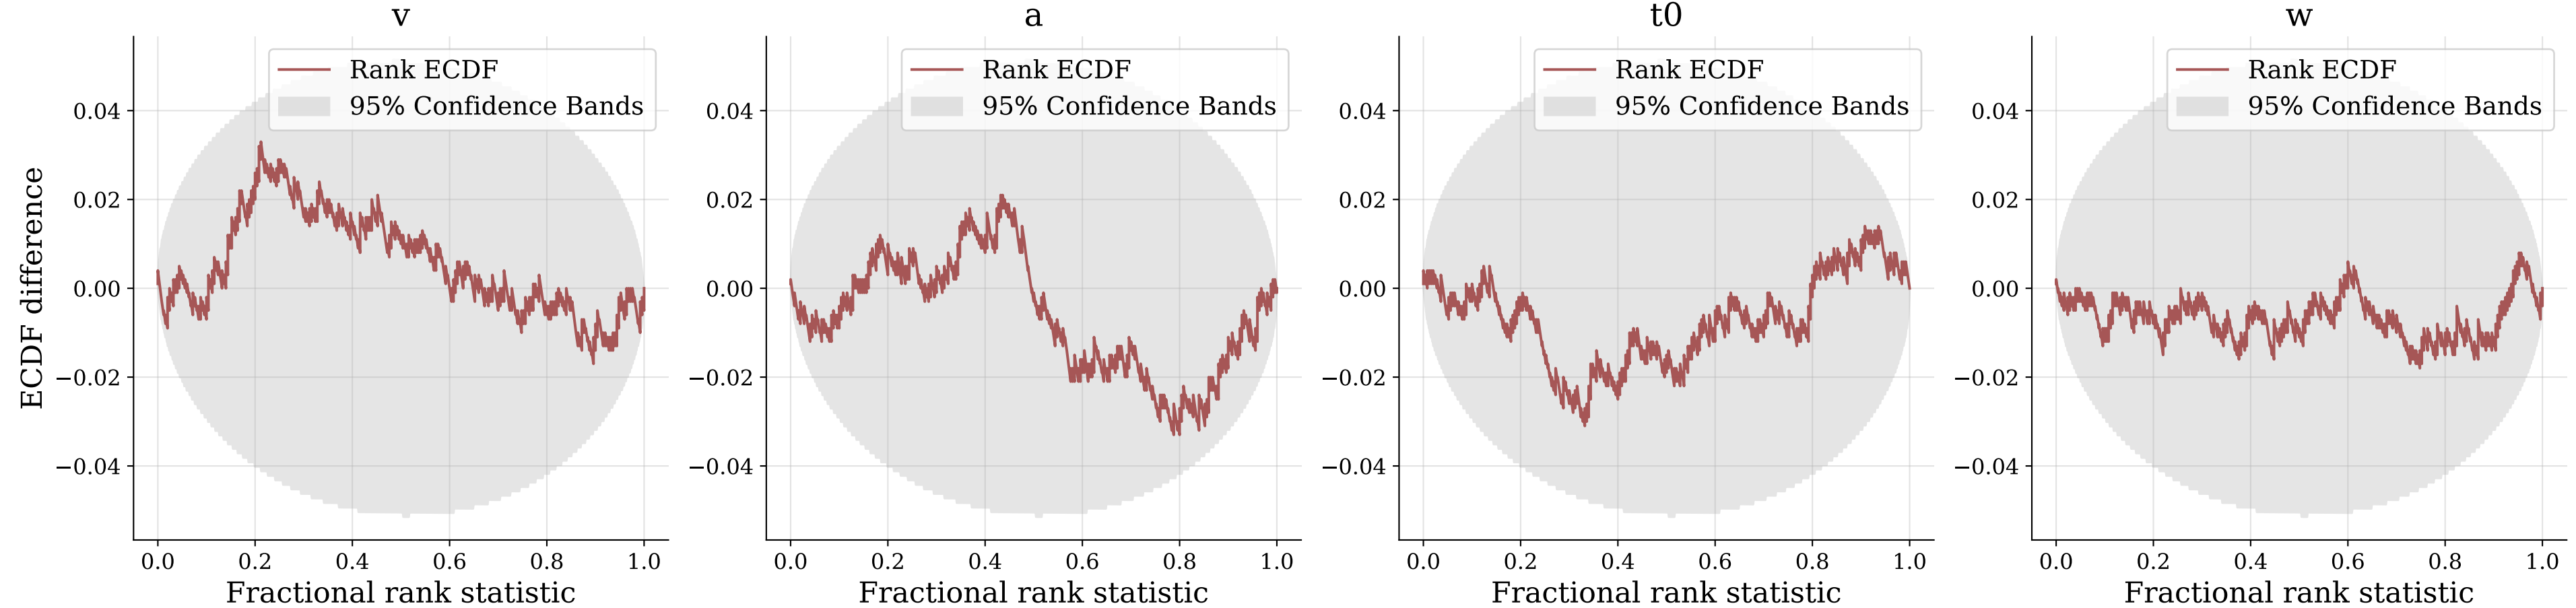

Supplement: supplementary_material [file attachment]

True



gSMC

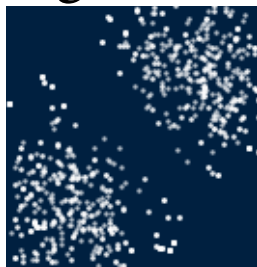

NPE-C

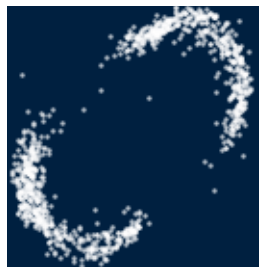

SNRE-B

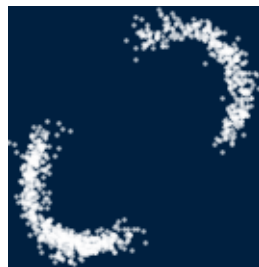

SNPE-C

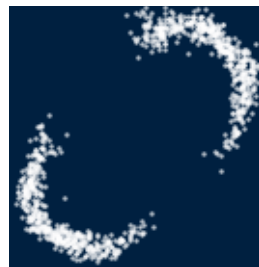

SNVI

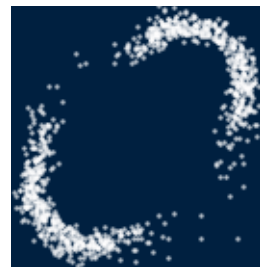

SNPLA

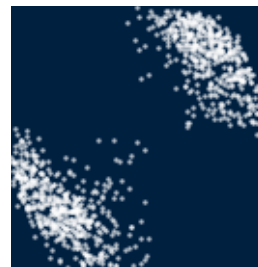

JANA

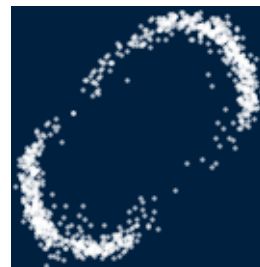 $N = 2000$ 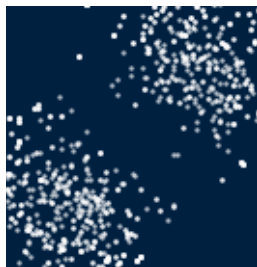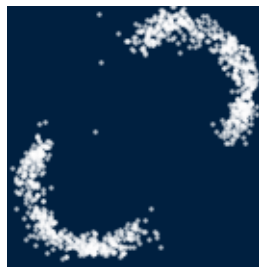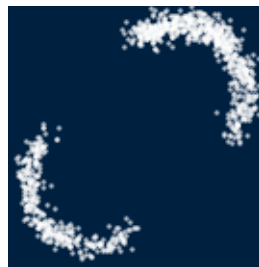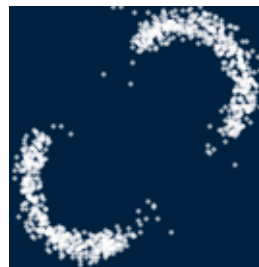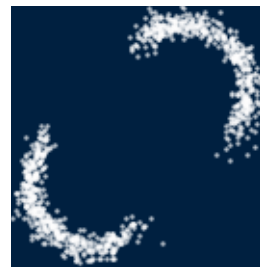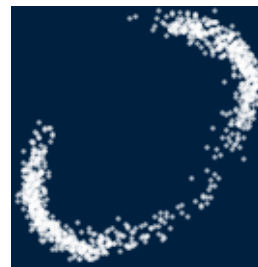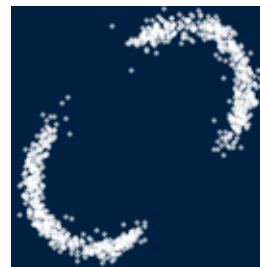 $N = 6000$ 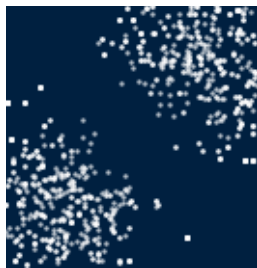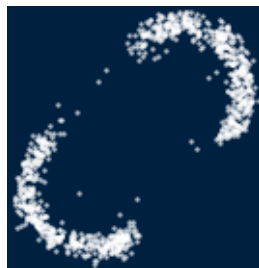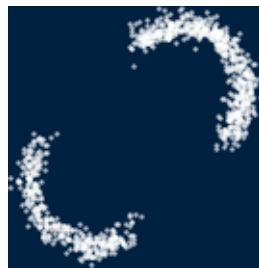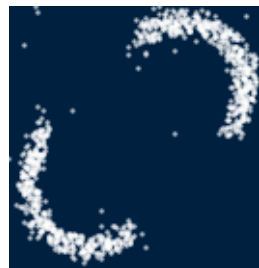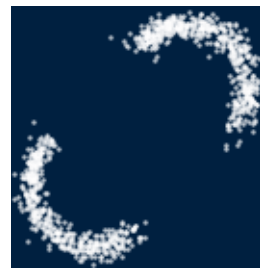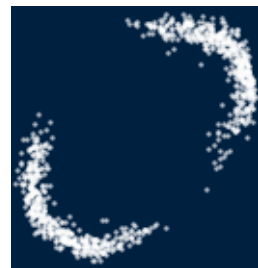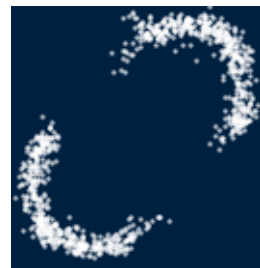 $N = 10000$

Supplement: supplementary_material [file attachment]

Post.Loss

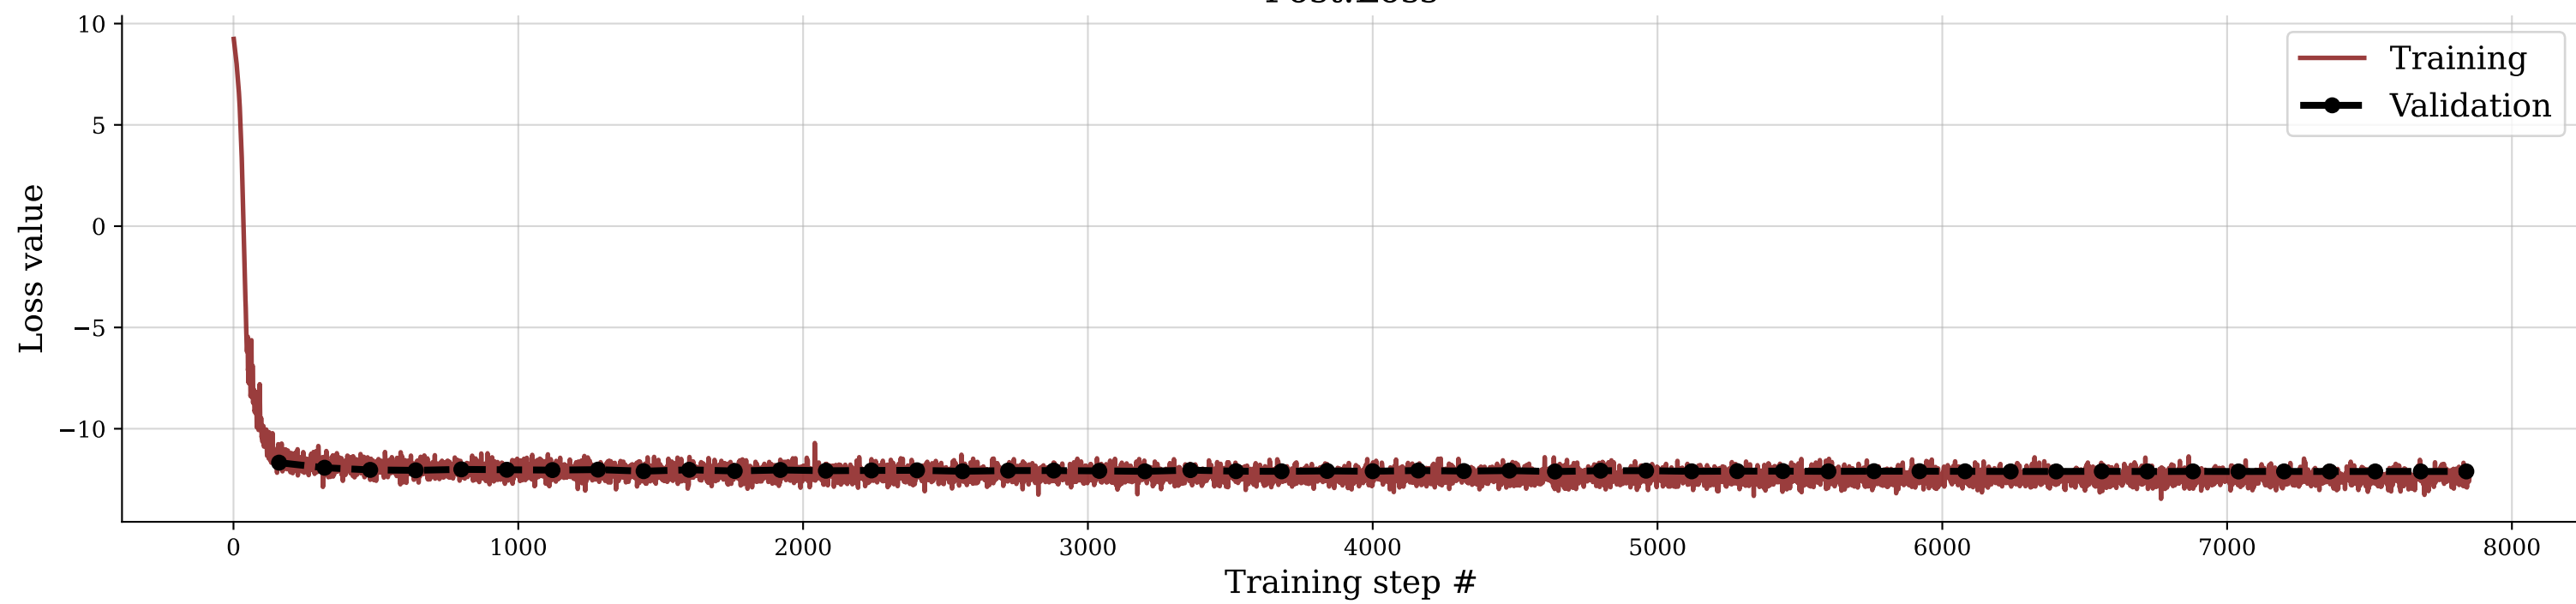

Lik.Loss

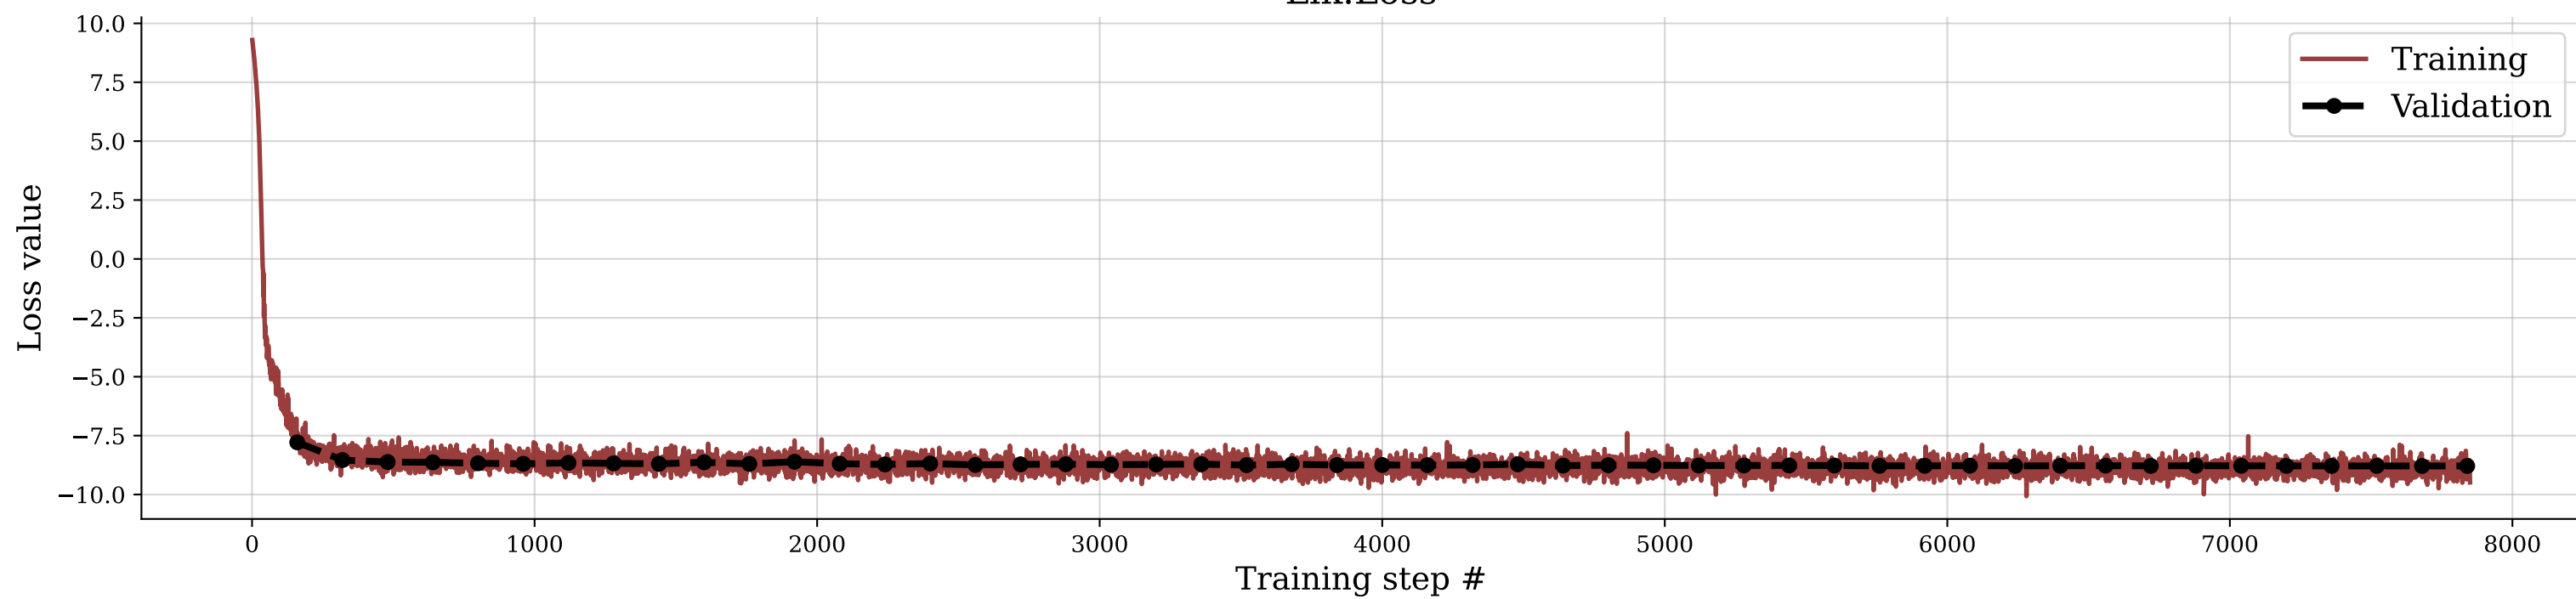

W.Decay

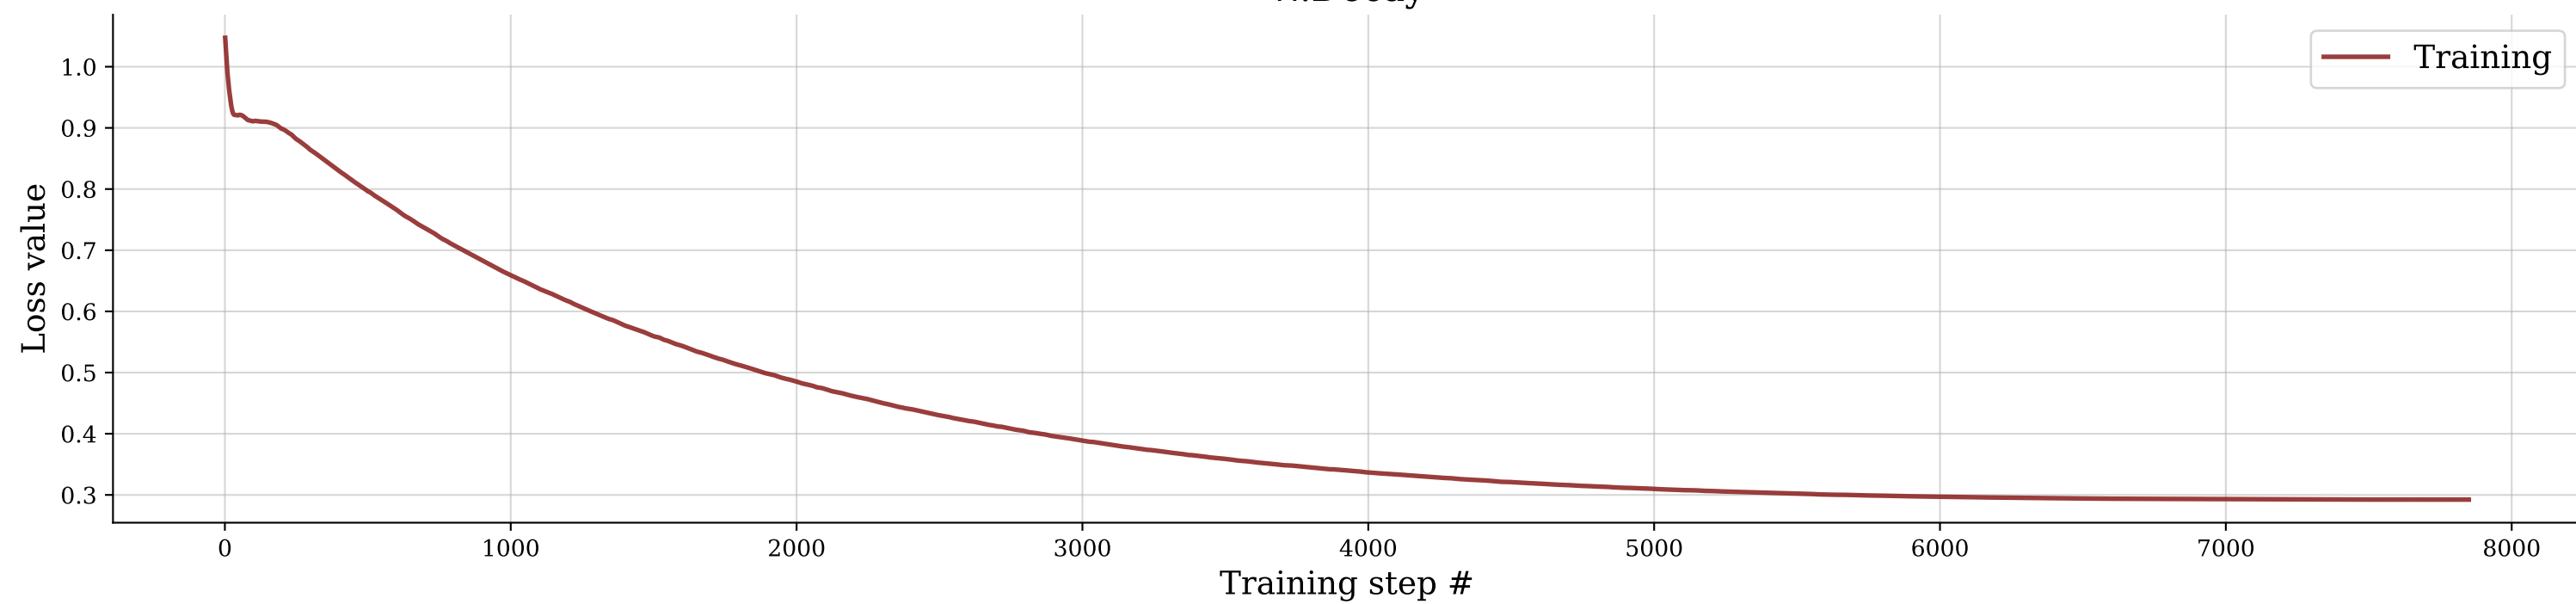

Supplement: supplementary_material [file attachment]

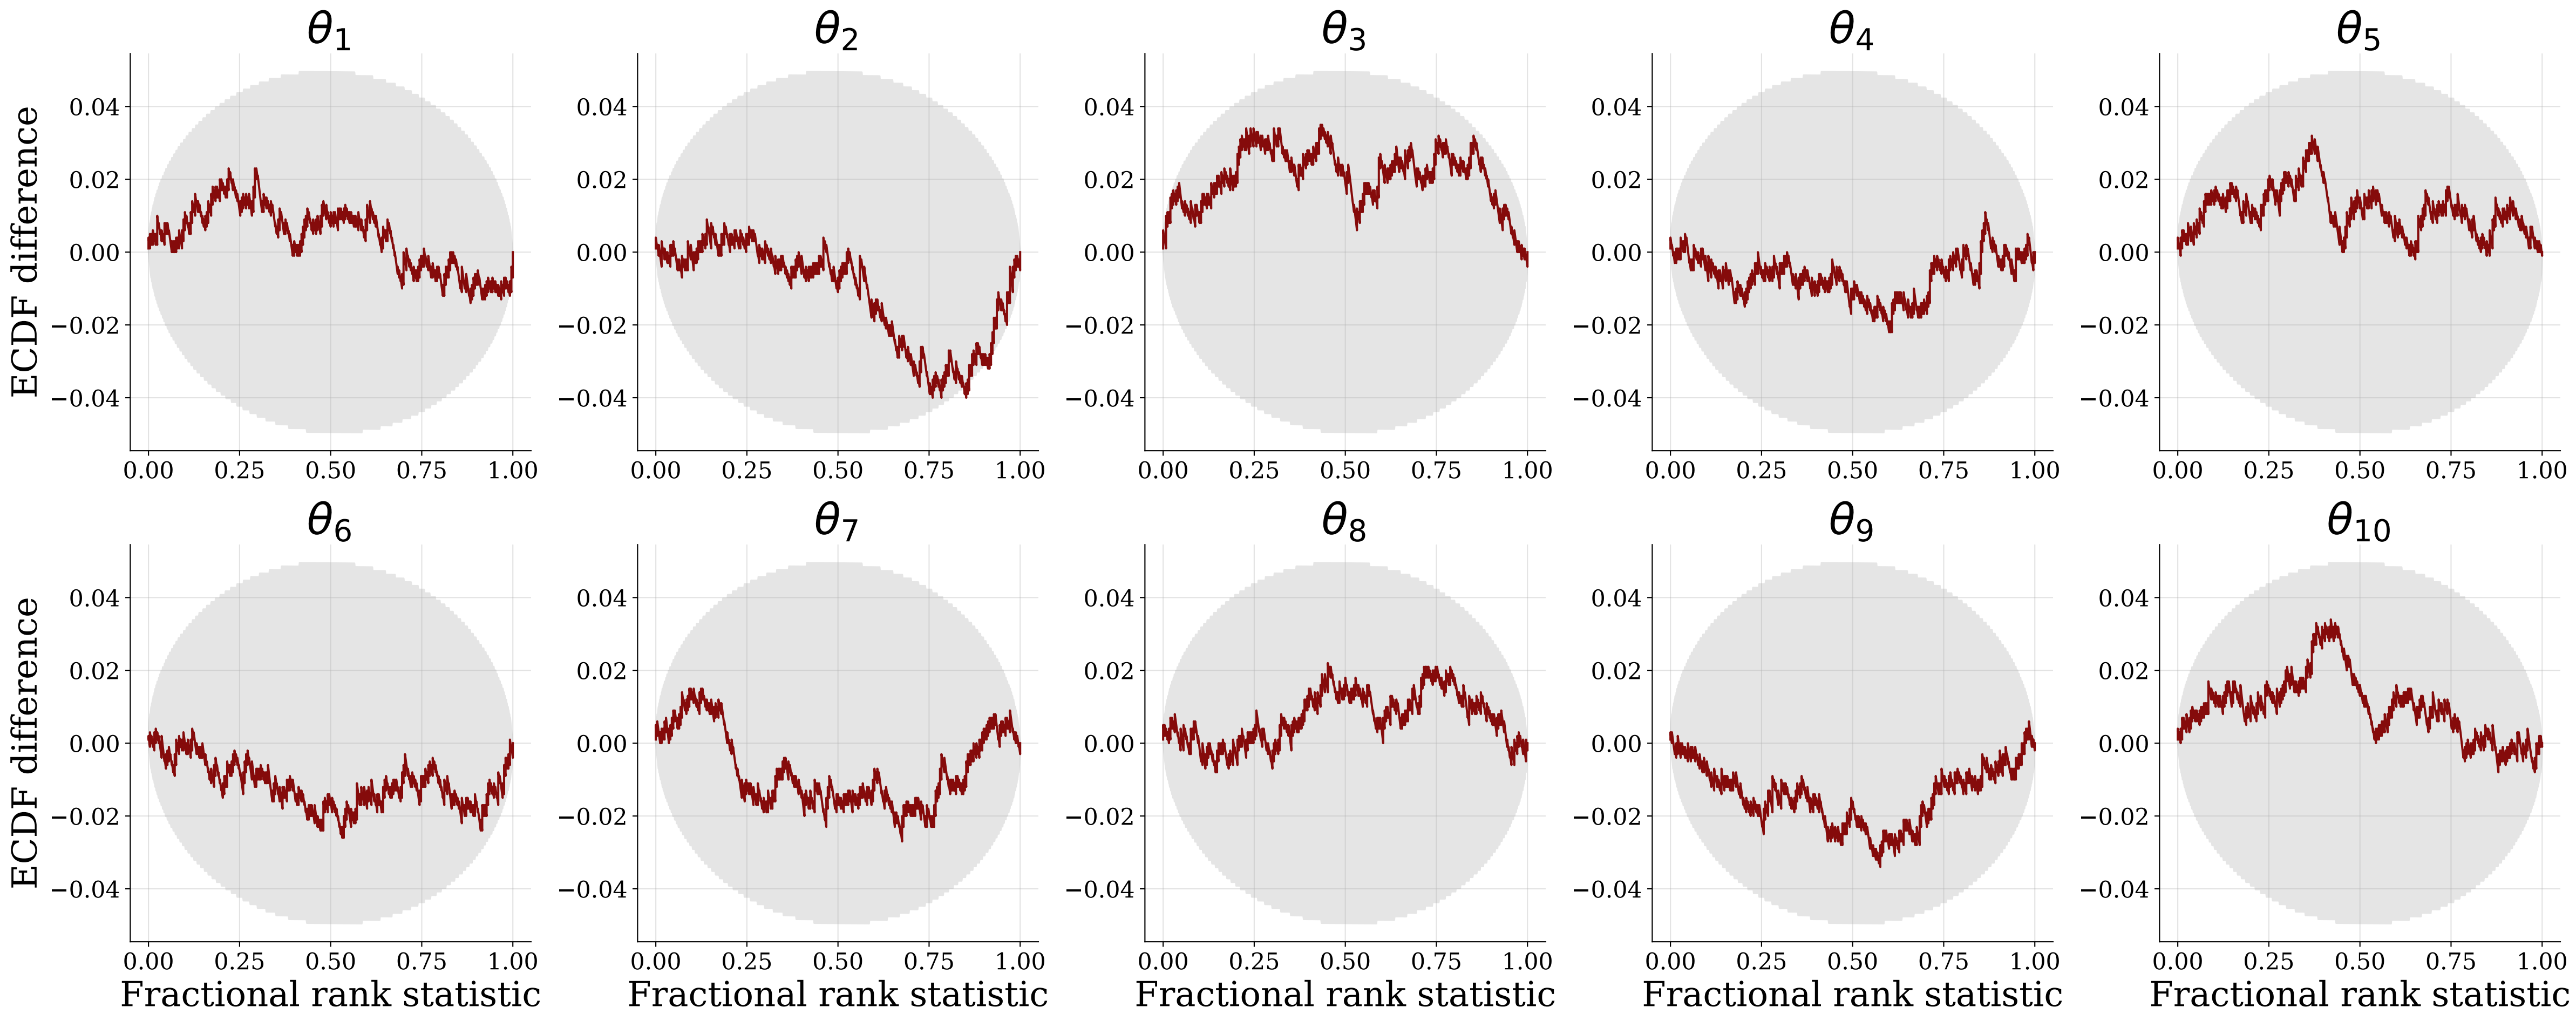

Supplement: supplementary_material [file attachment]

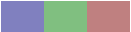

50% CI

Supplement: supplementary_material [file attachment]

Surrogate

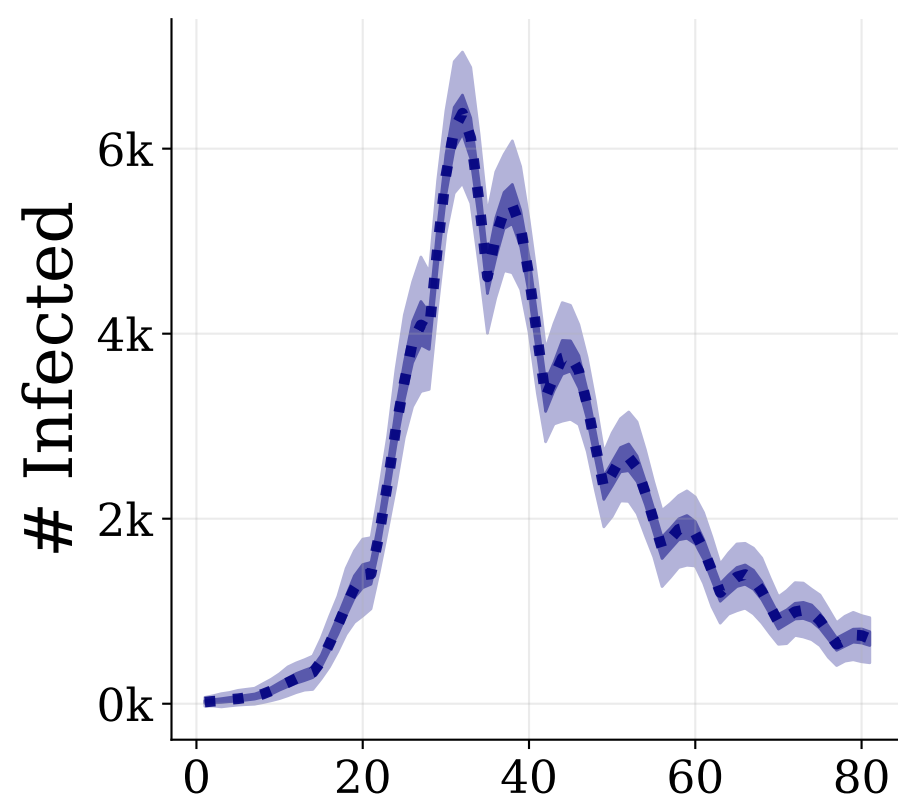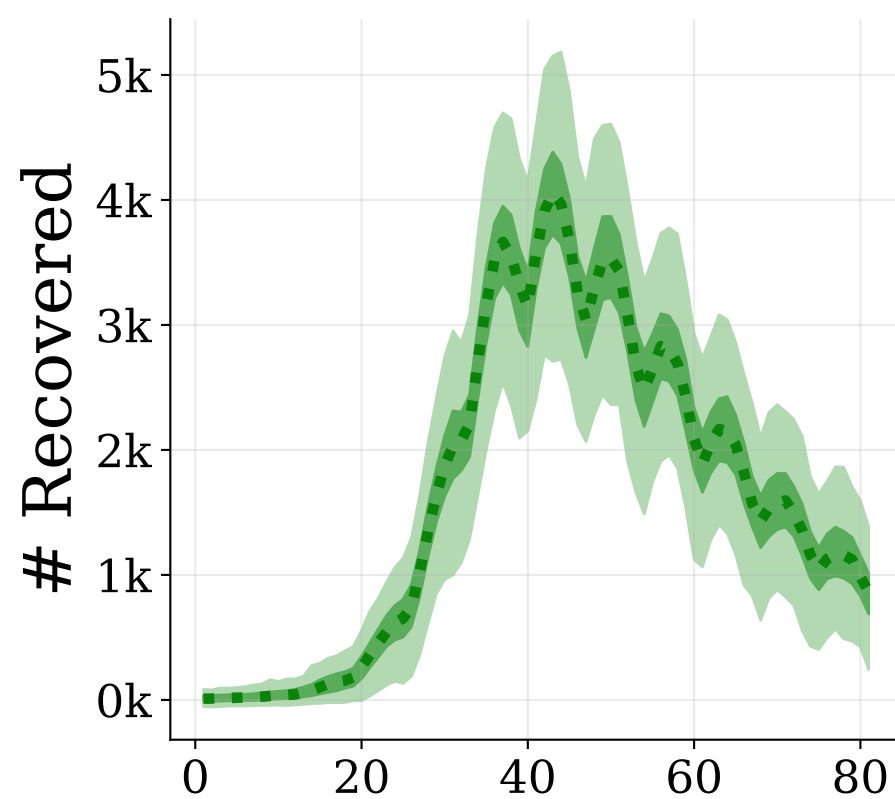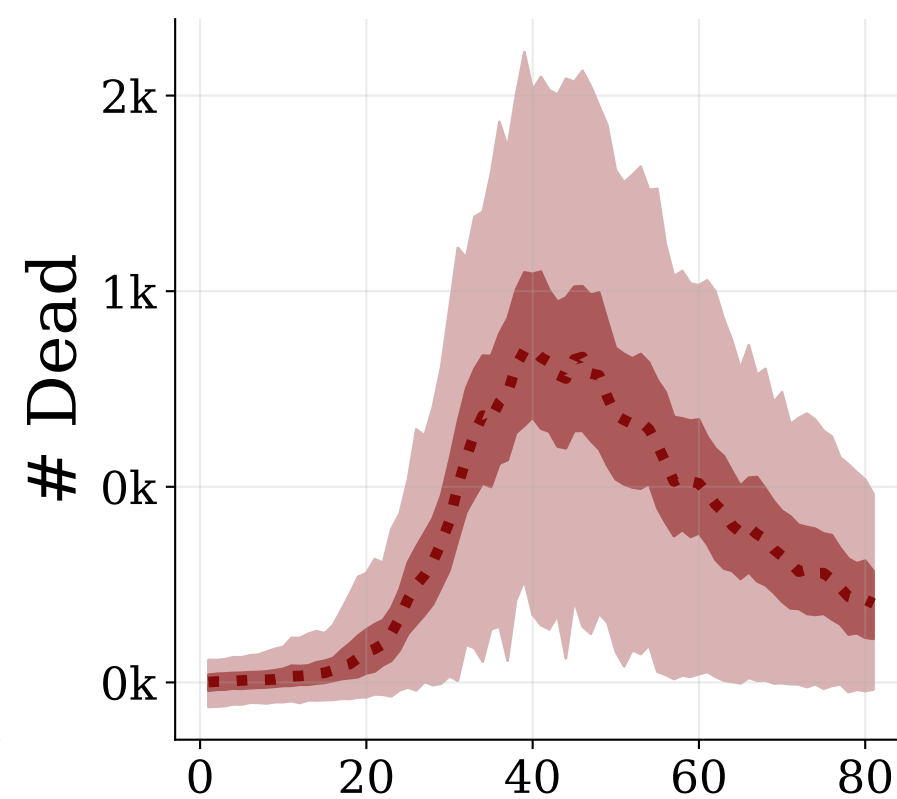

Simulator

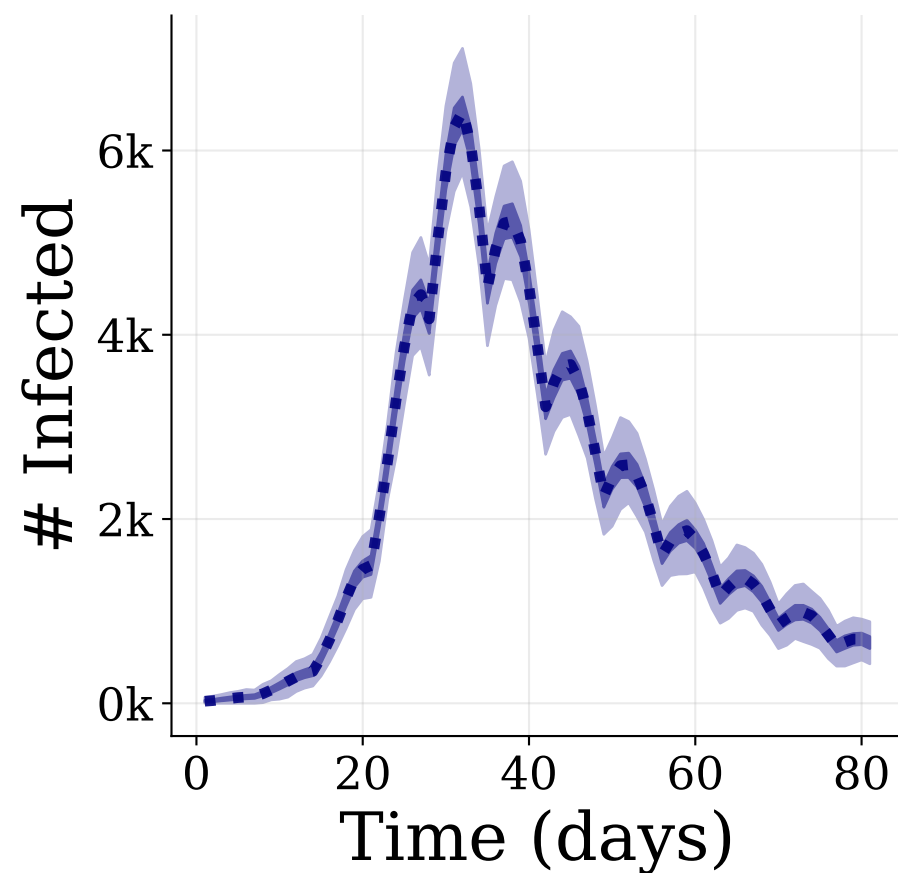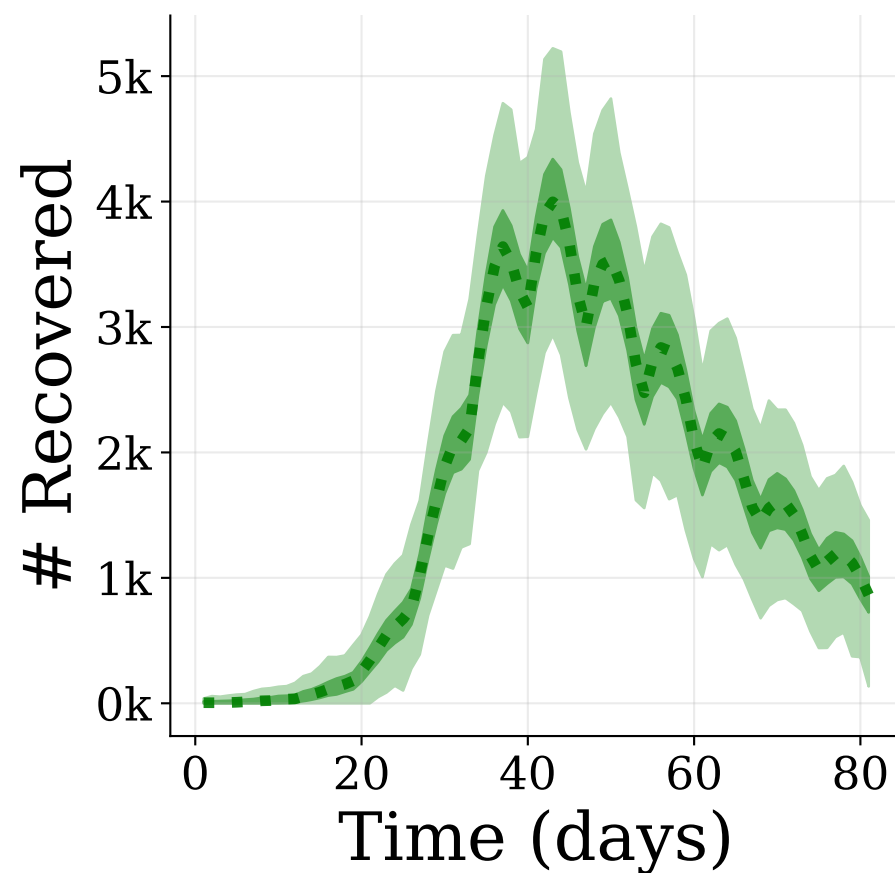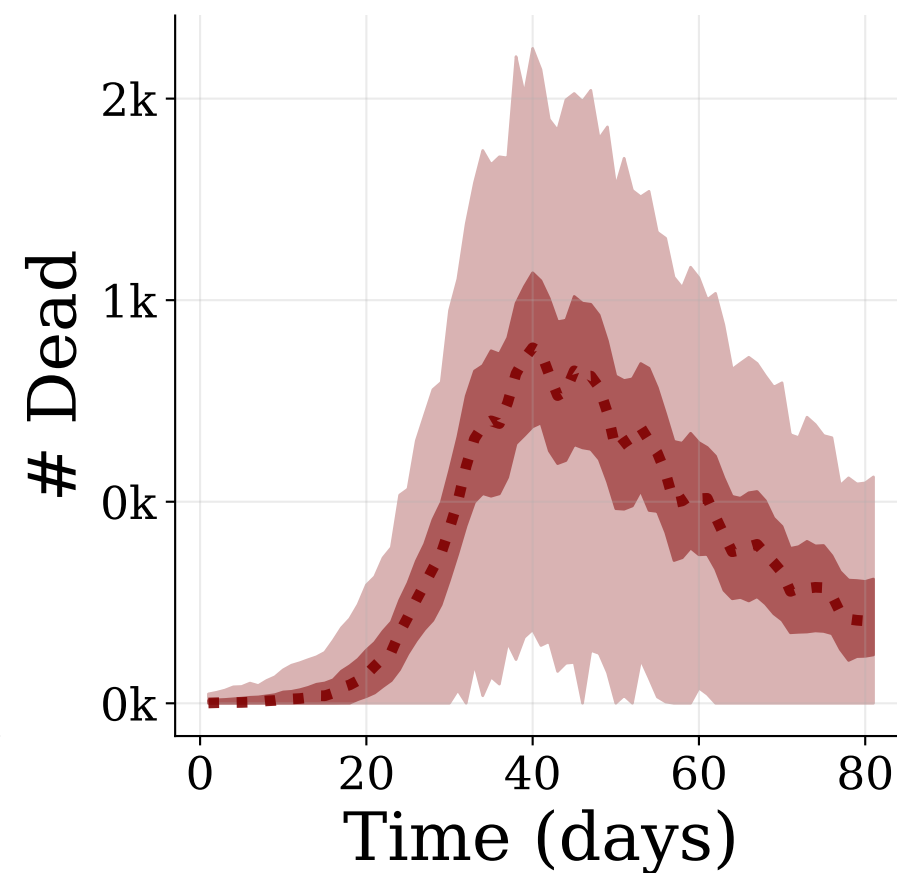

Supplement: supplementary_material [file attachment]

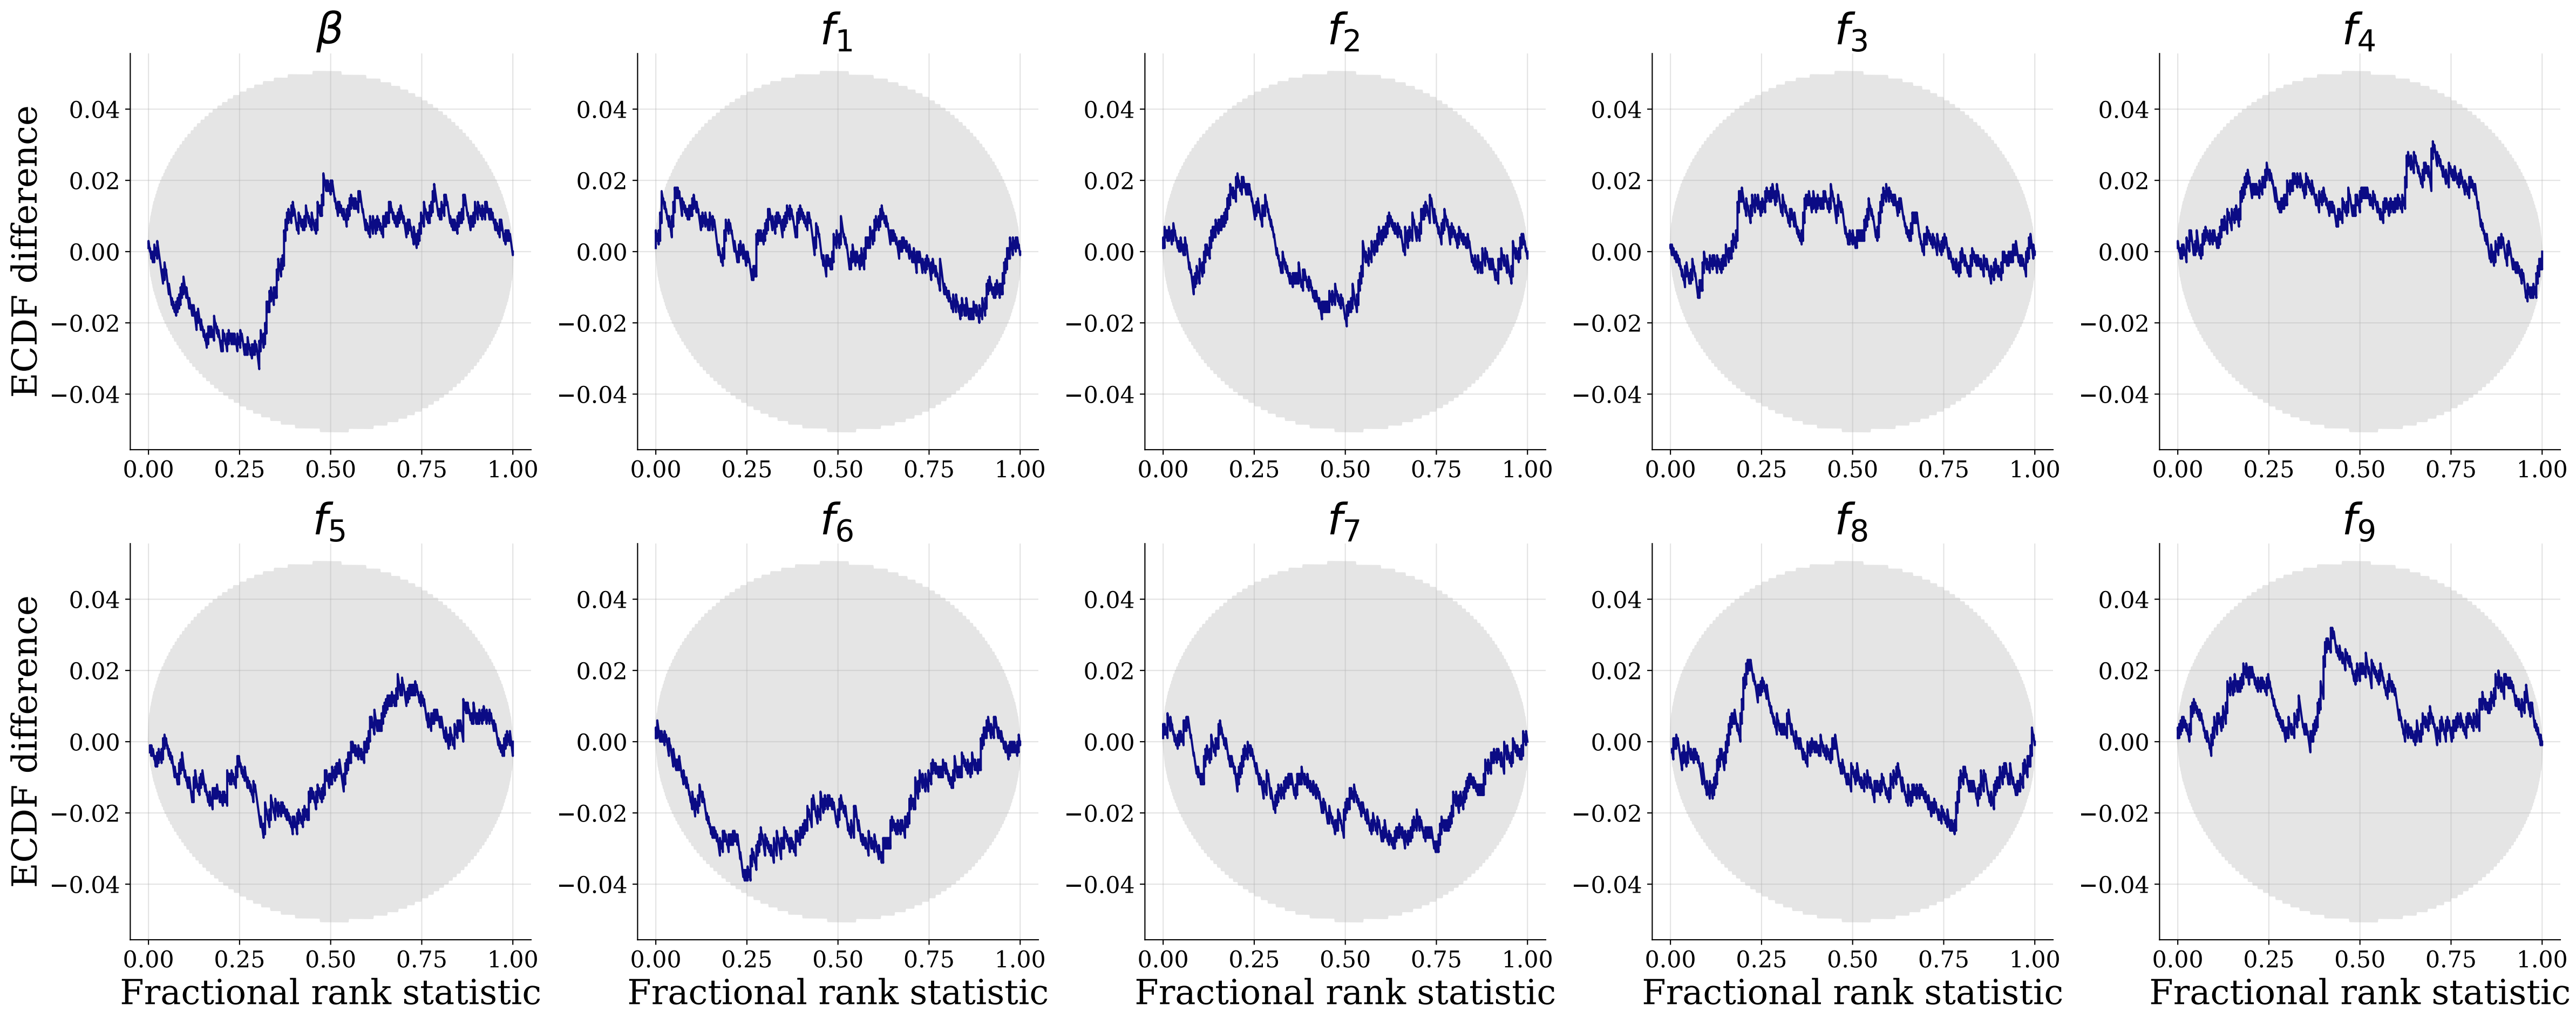

Supplement: supplementary_material [file attachment]

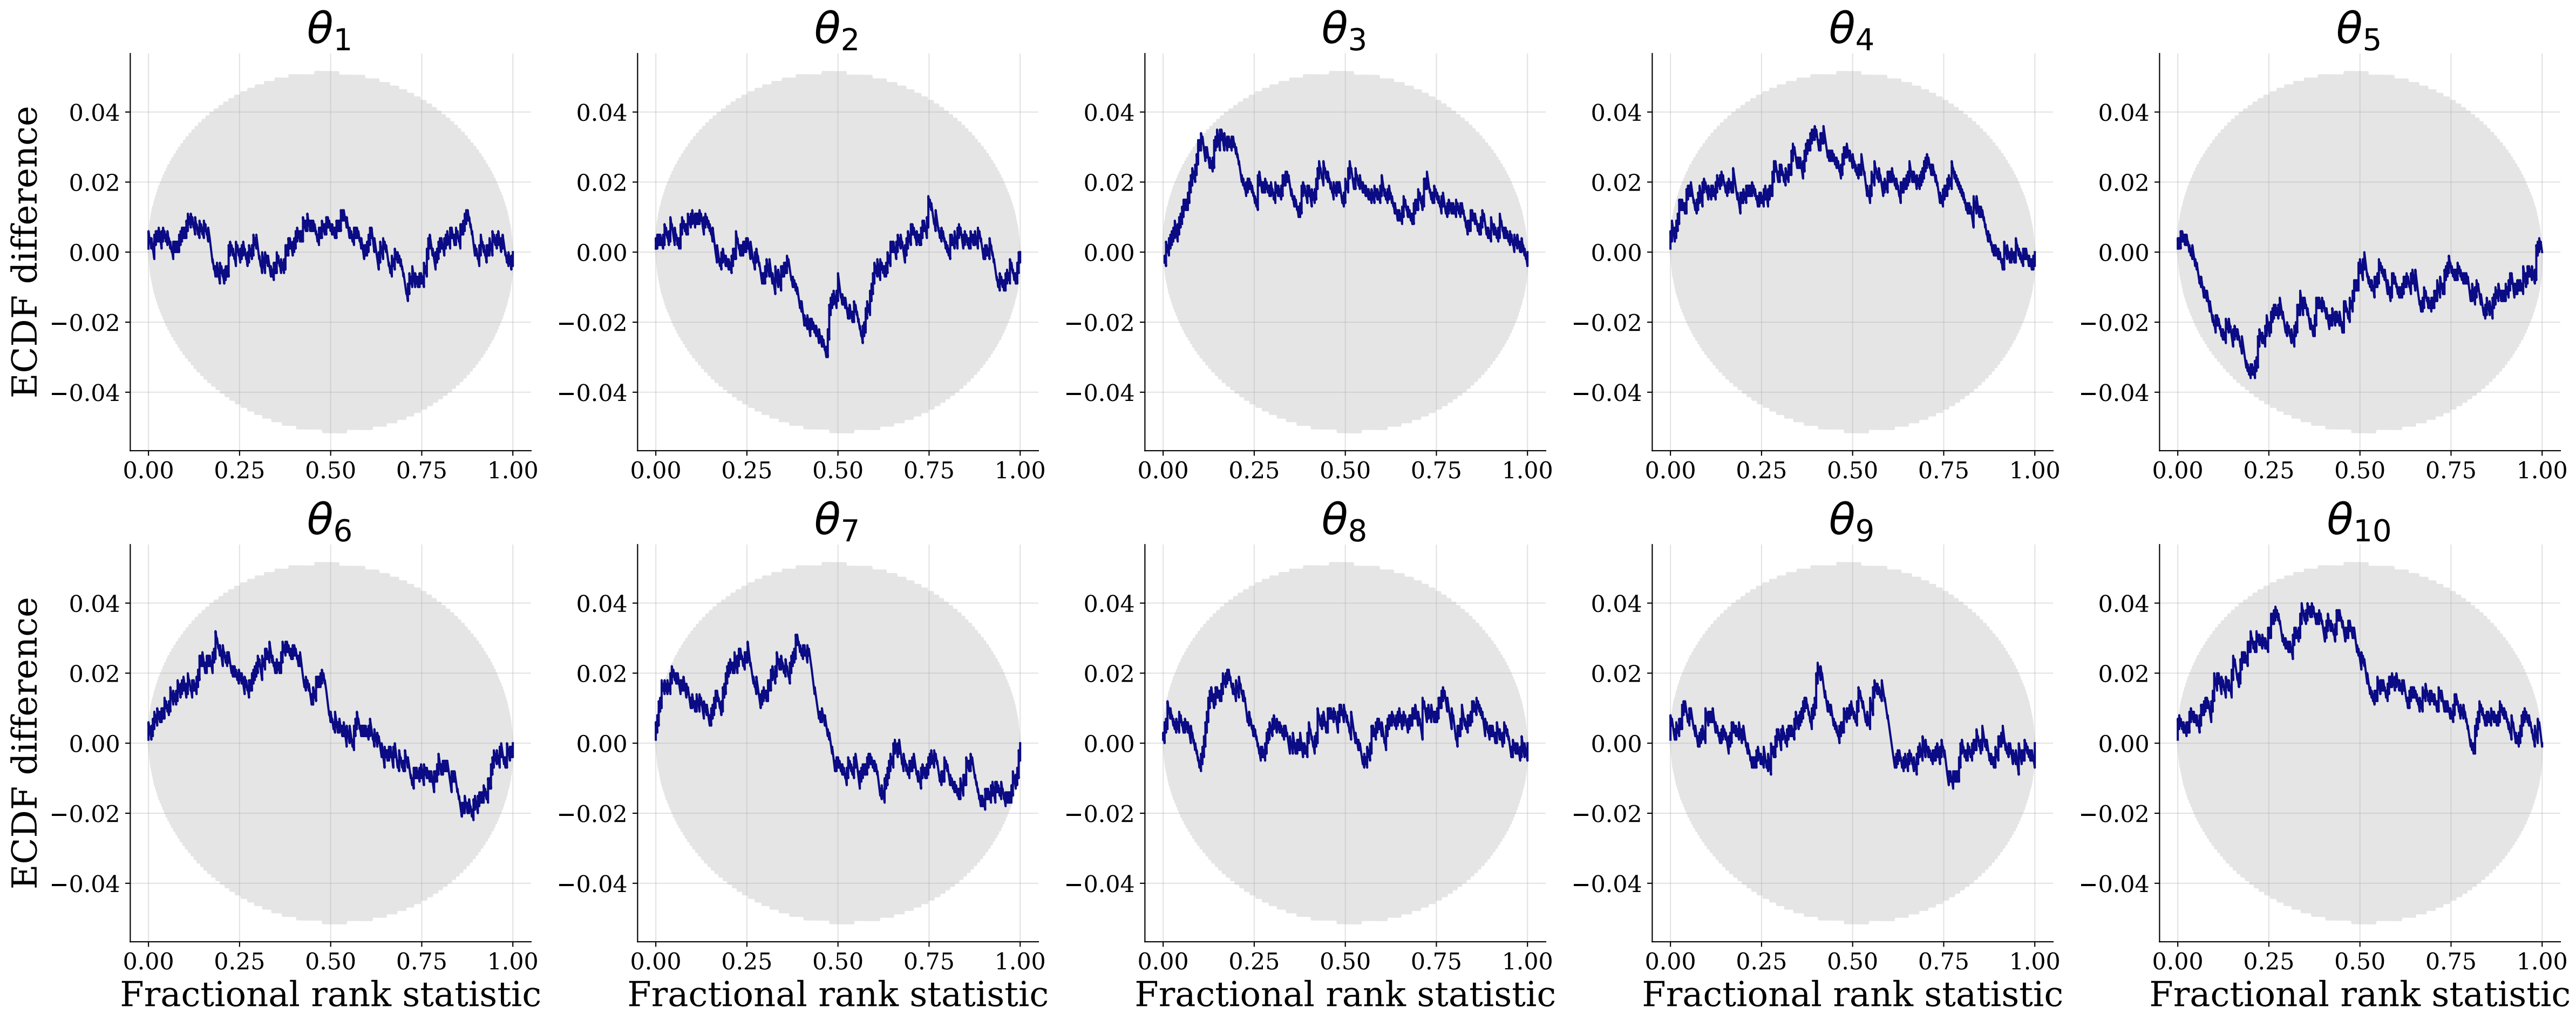

Supplement: supplementary_material [file attachment]

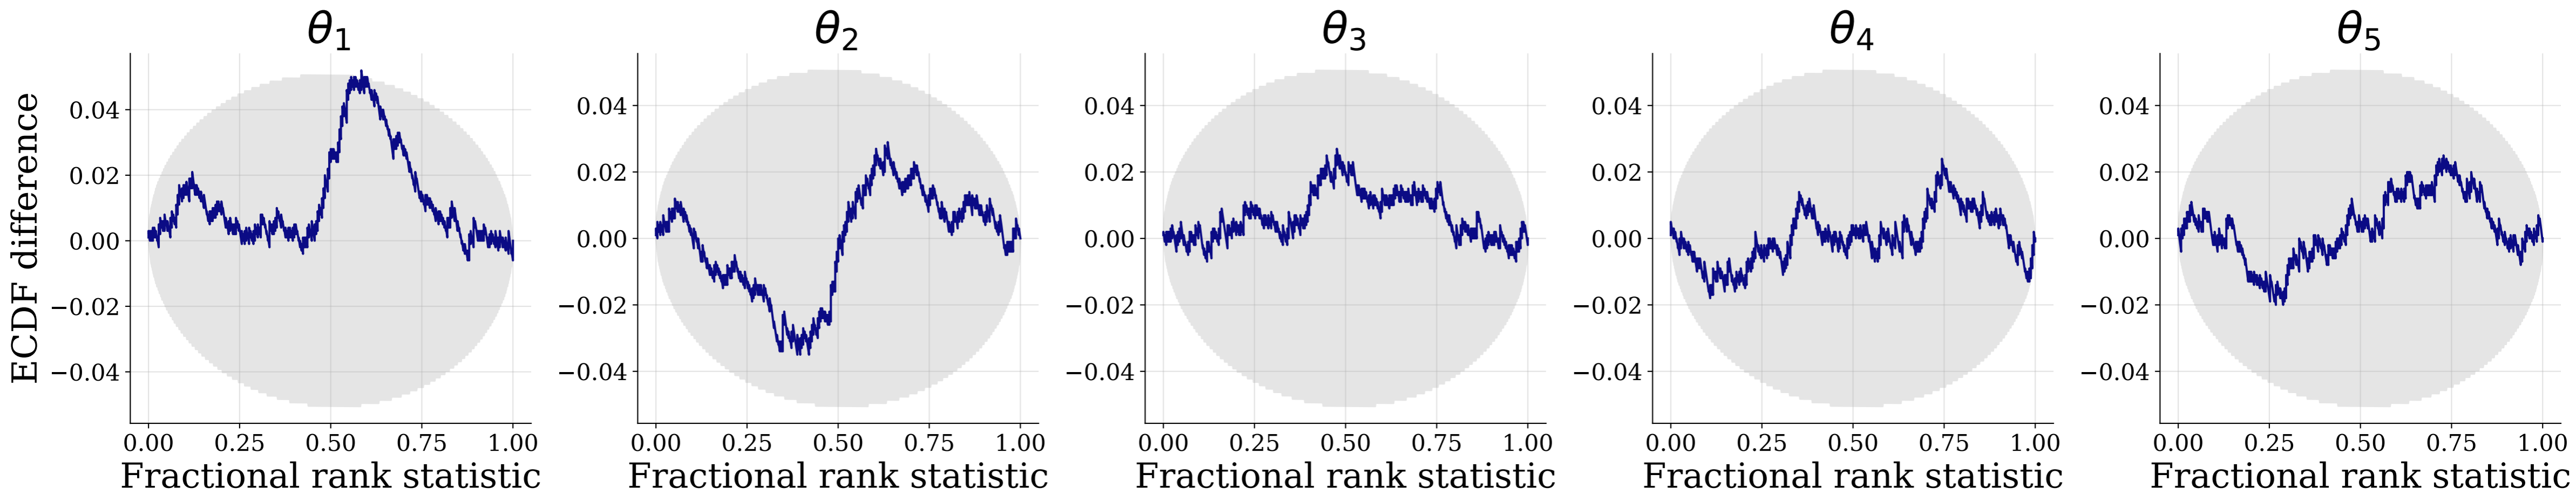

Supplement: supplementary_material [file attachment]

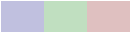

95% CI

Supplement: supplementary_material [file attachment]

True



NPE-C

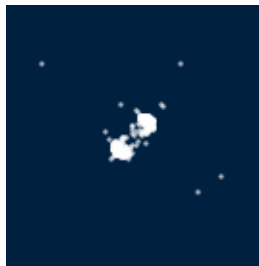

SNRE-B

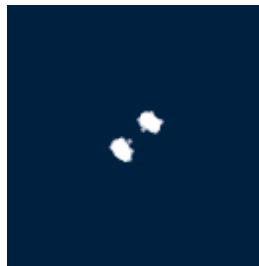

SNPE-C

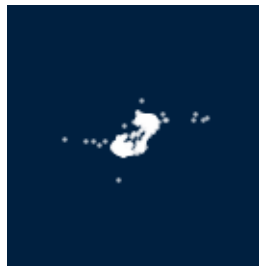

SNVI

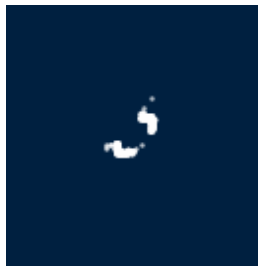

# SNPLA

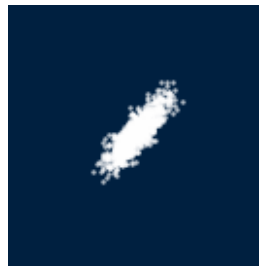

JANA

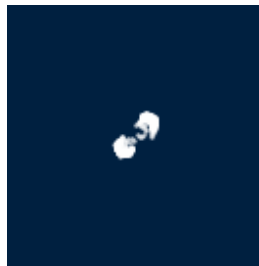
$$N = 2000$$
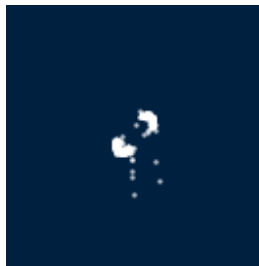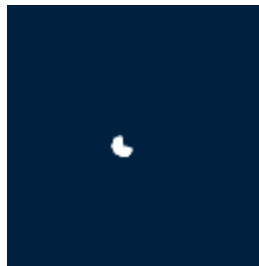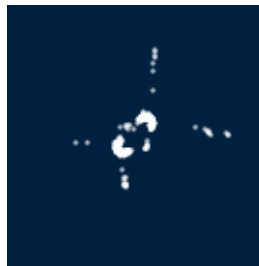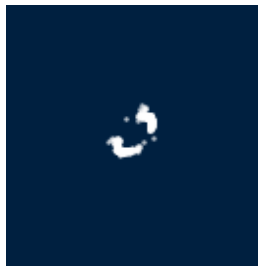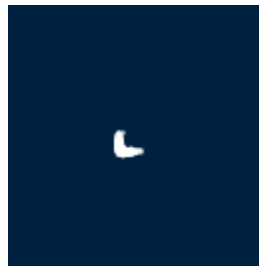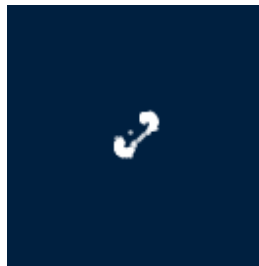
$$N = 6000$$
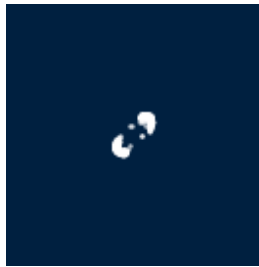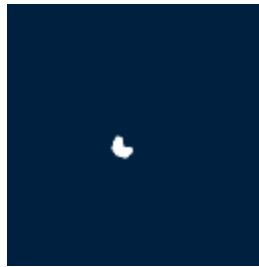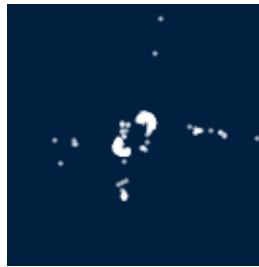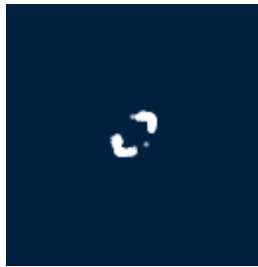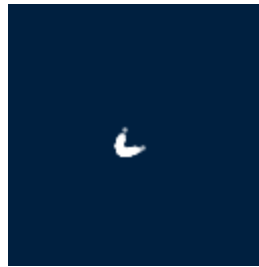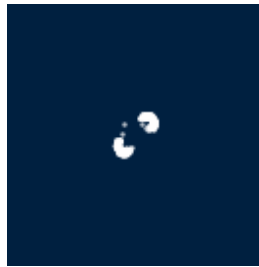
$$\underline{N = 10000}$$

Supplement: supplementary_material [file attachment]

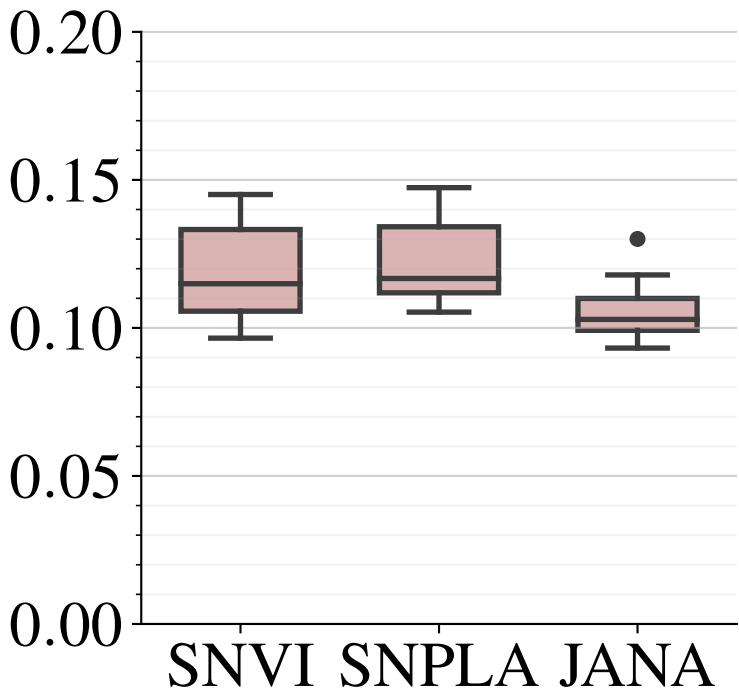

Supplement: supplementary_material [file attachment]

Post.Loss

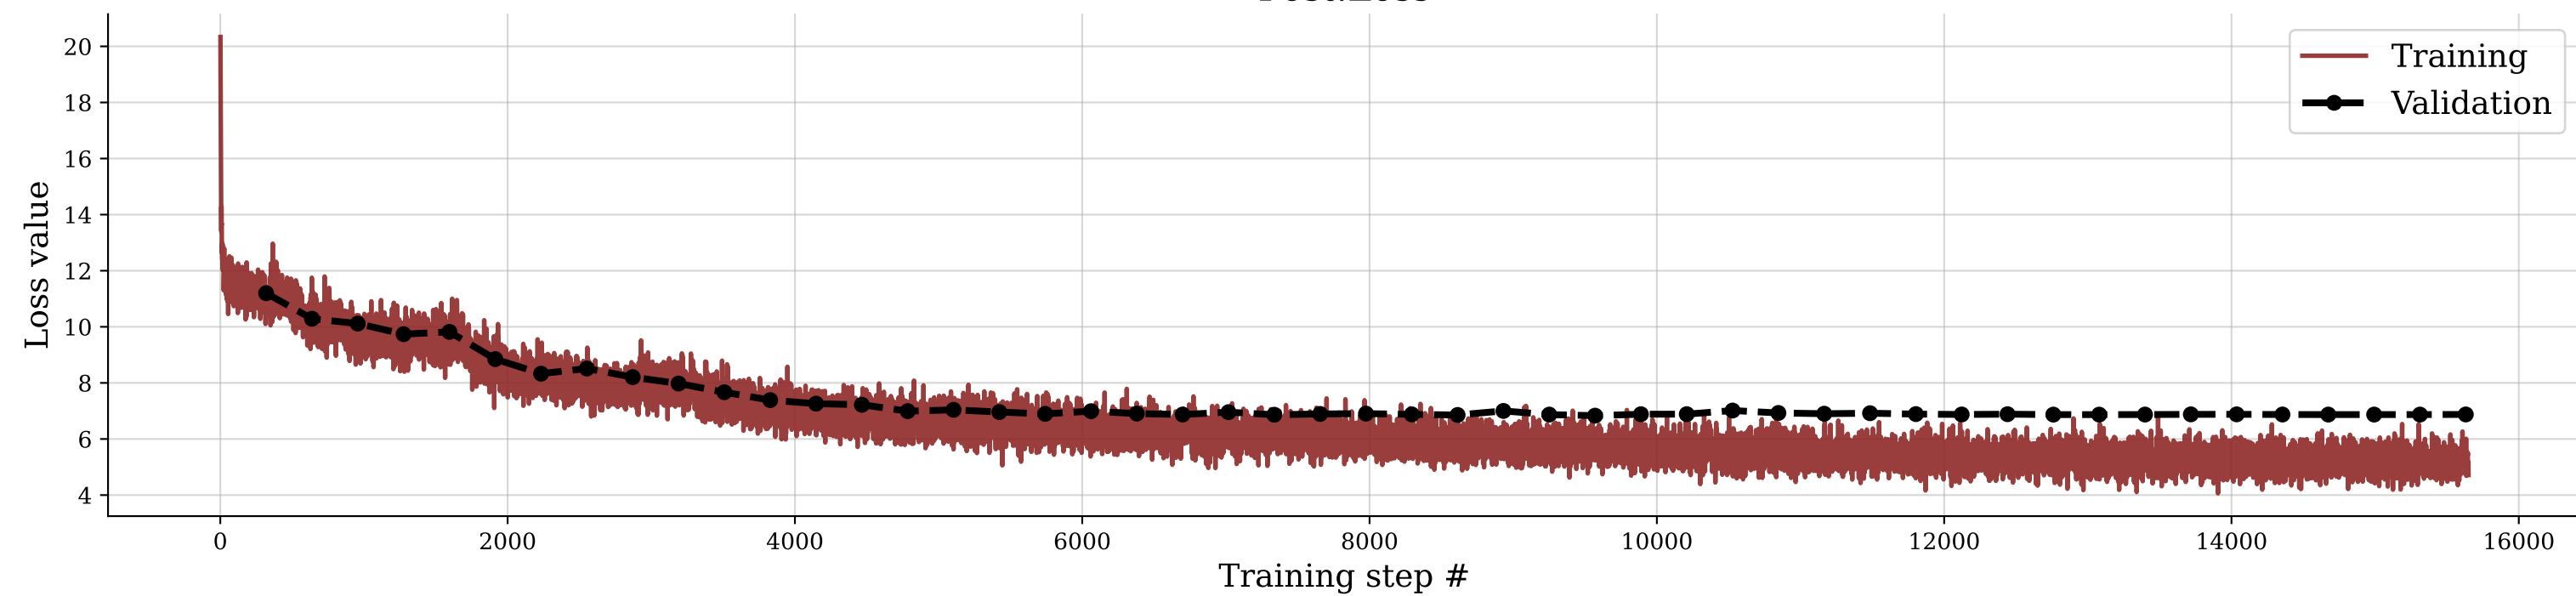

Lik.Loss

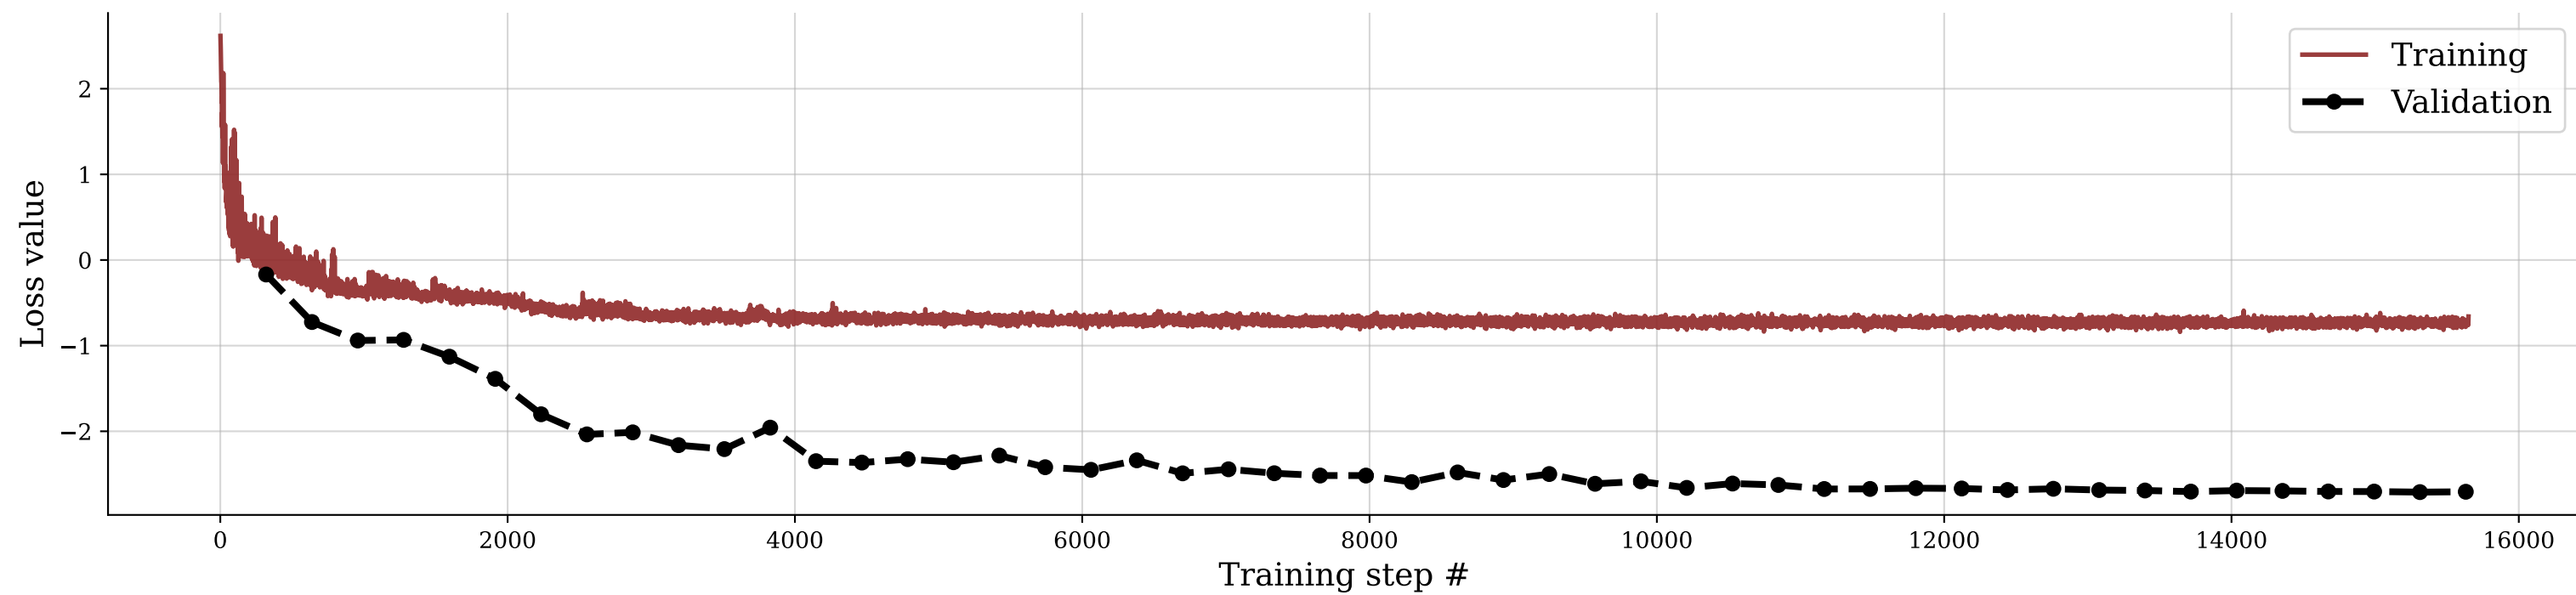

W.Decay

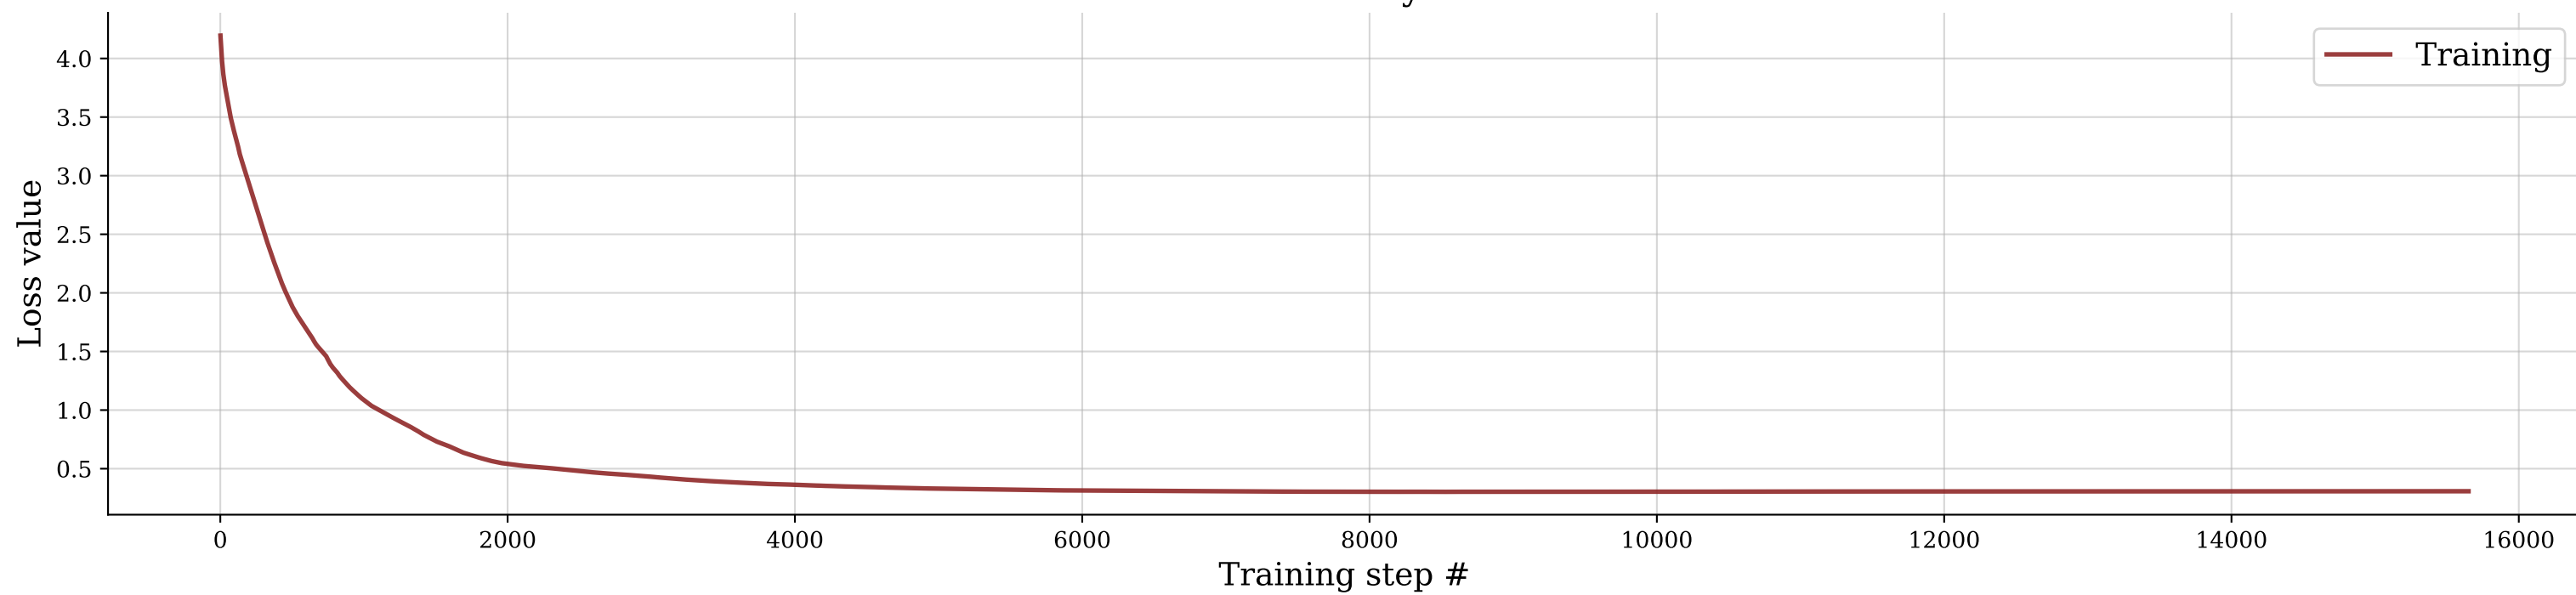

Supplement: supplementary_material [file attachment]

ECDF difference

$\theta_1$

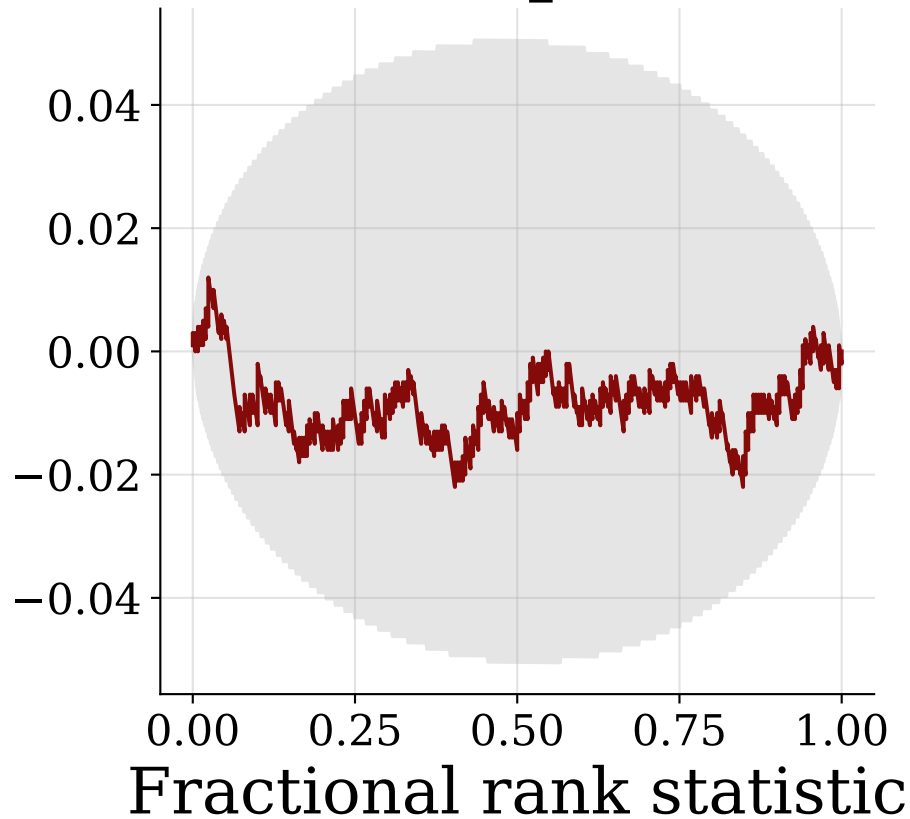

$\theta_2$

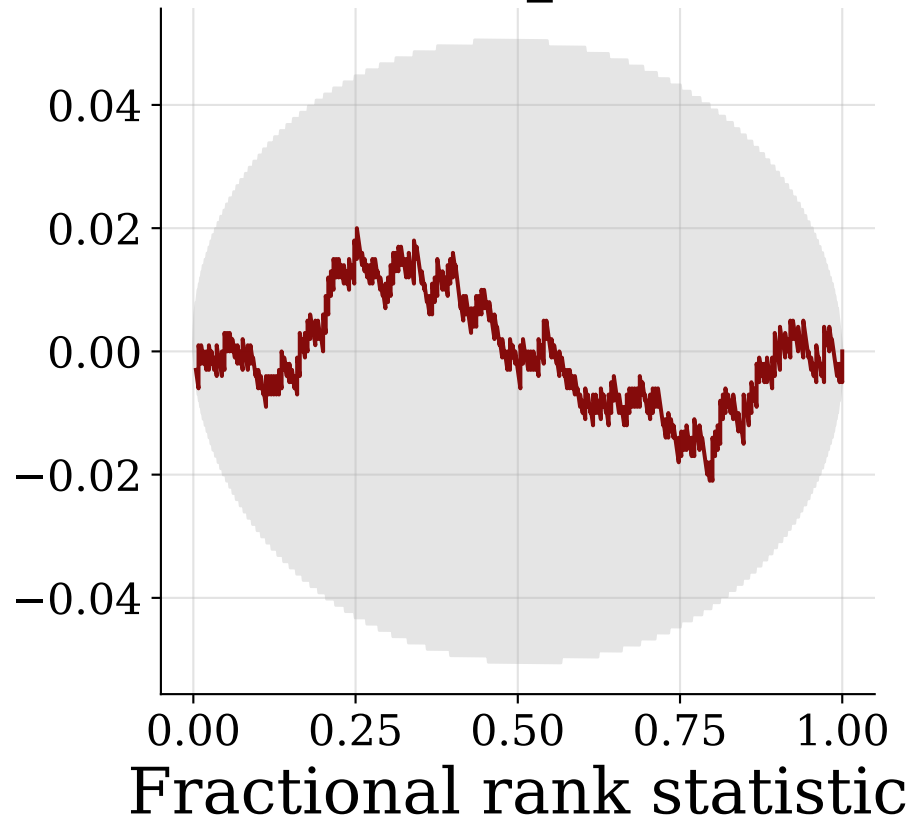

Supplement: supplementary_material [file attachment]

Post.Loss

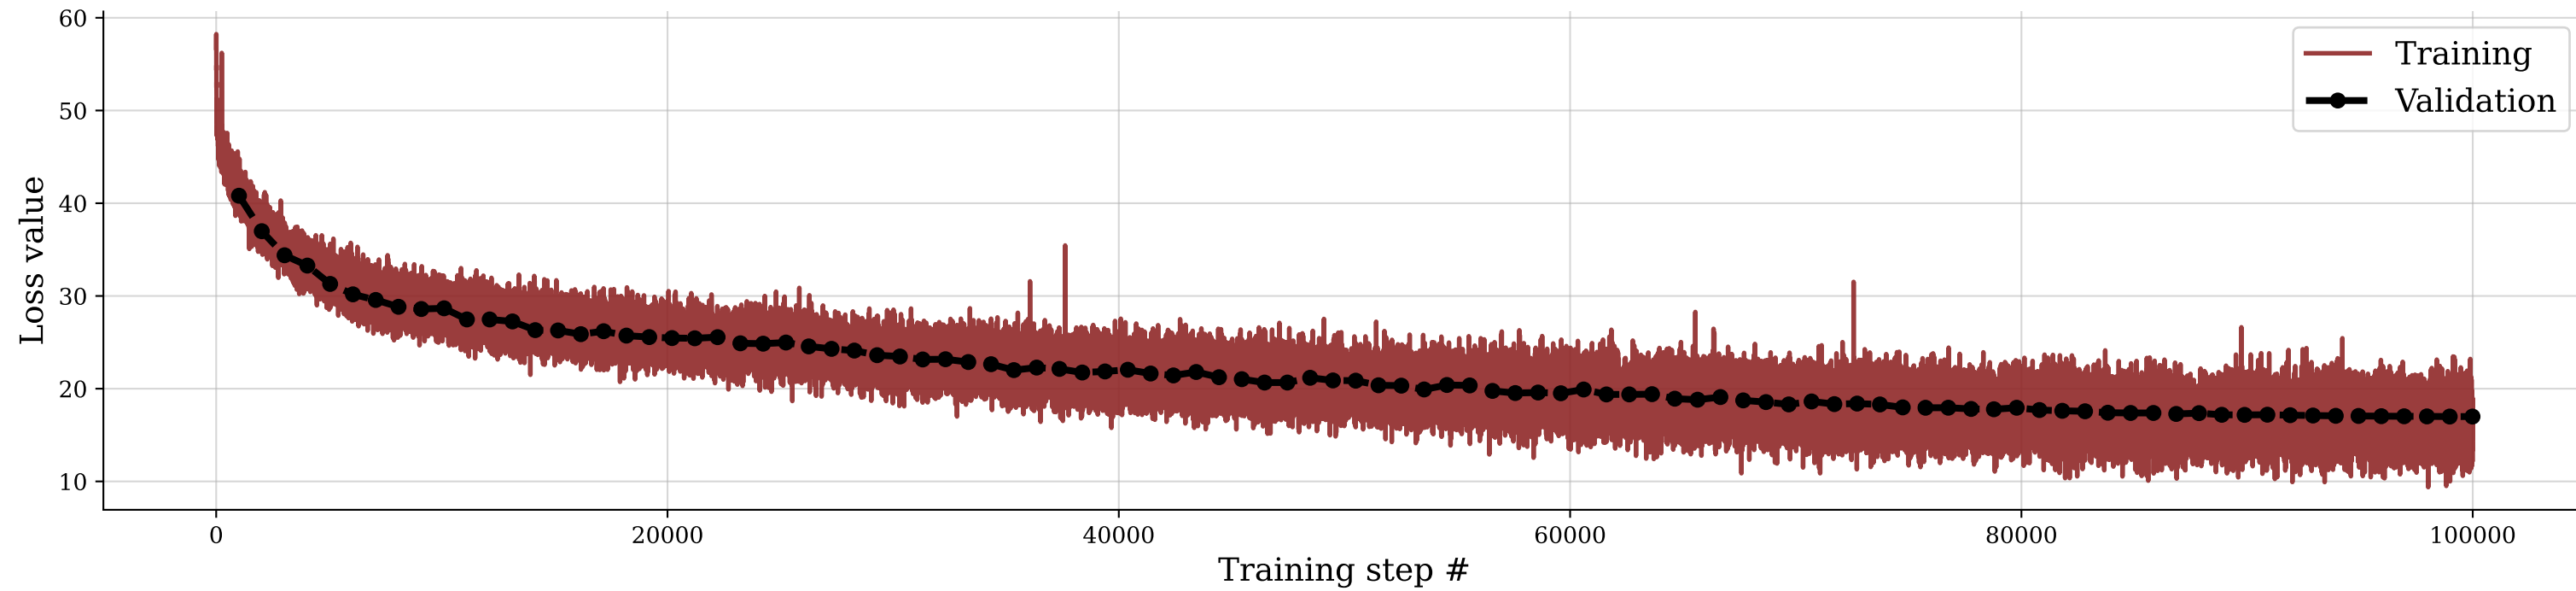

Lik.Loss

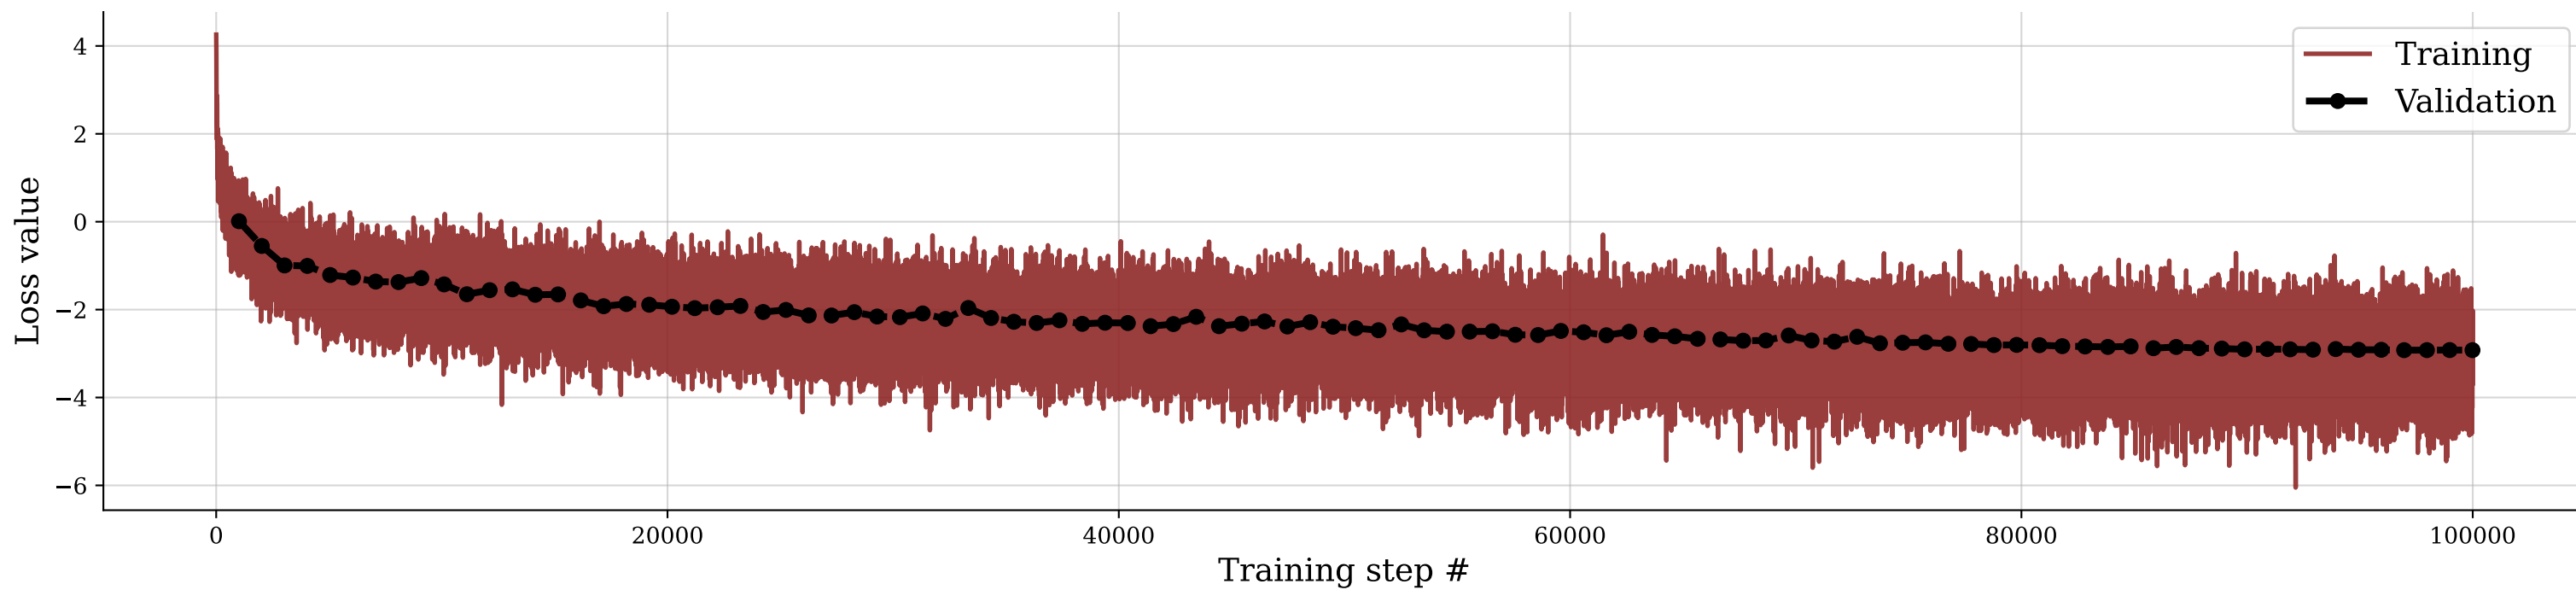

Supplement: supplementary_material [file attachment]

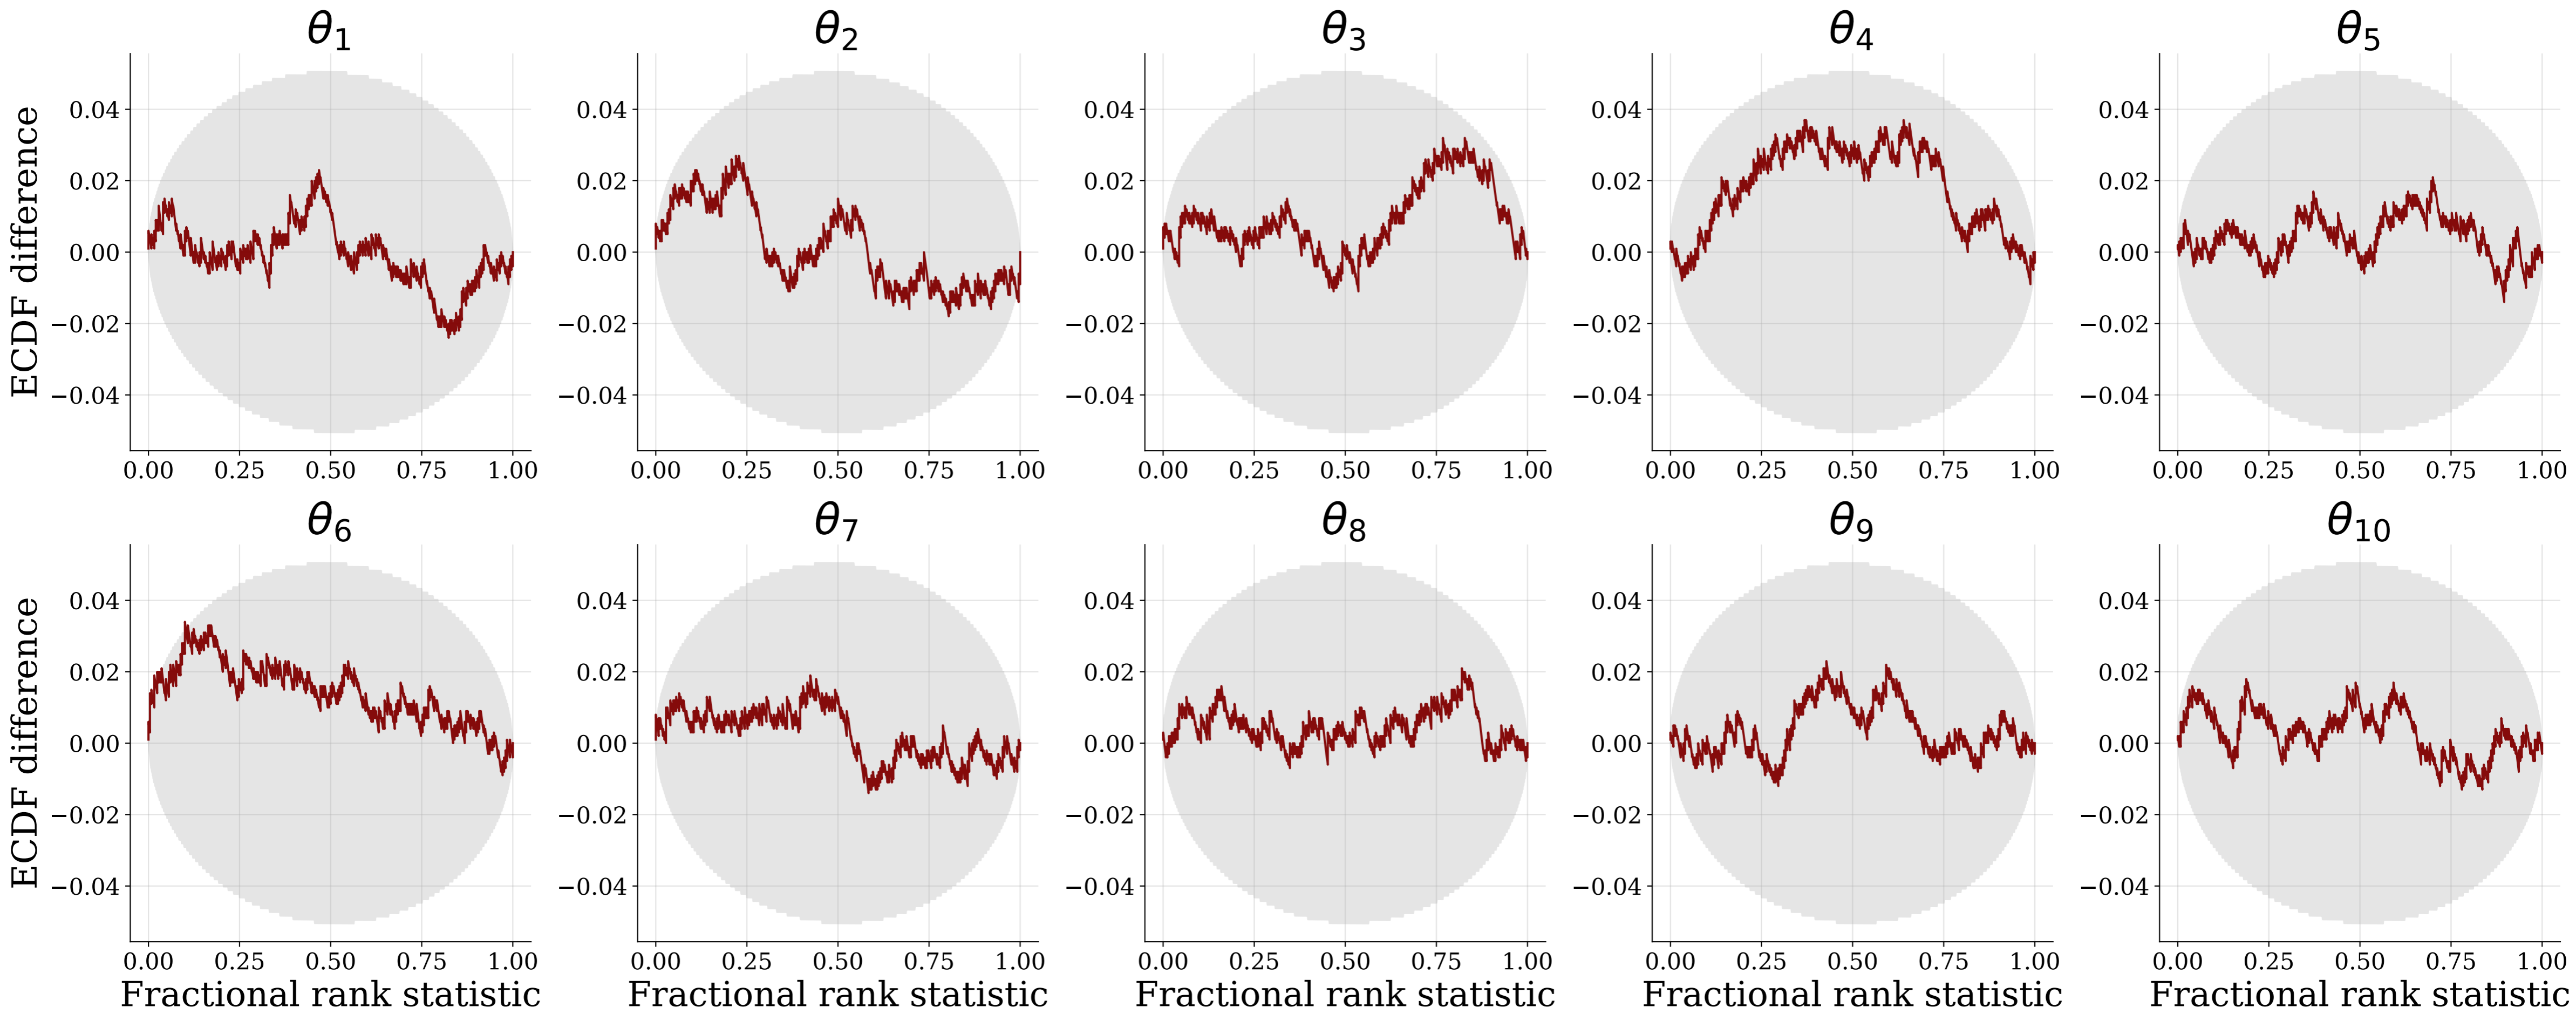

Supplement: supplementary_material [file attachment]

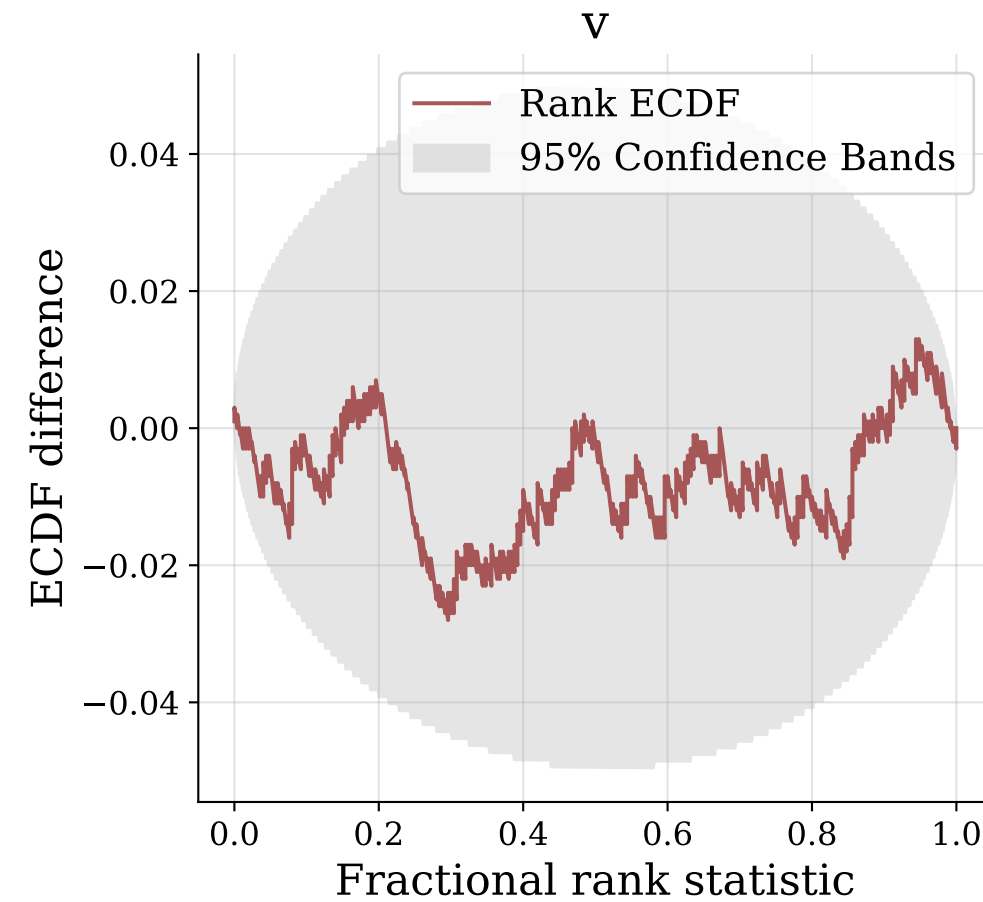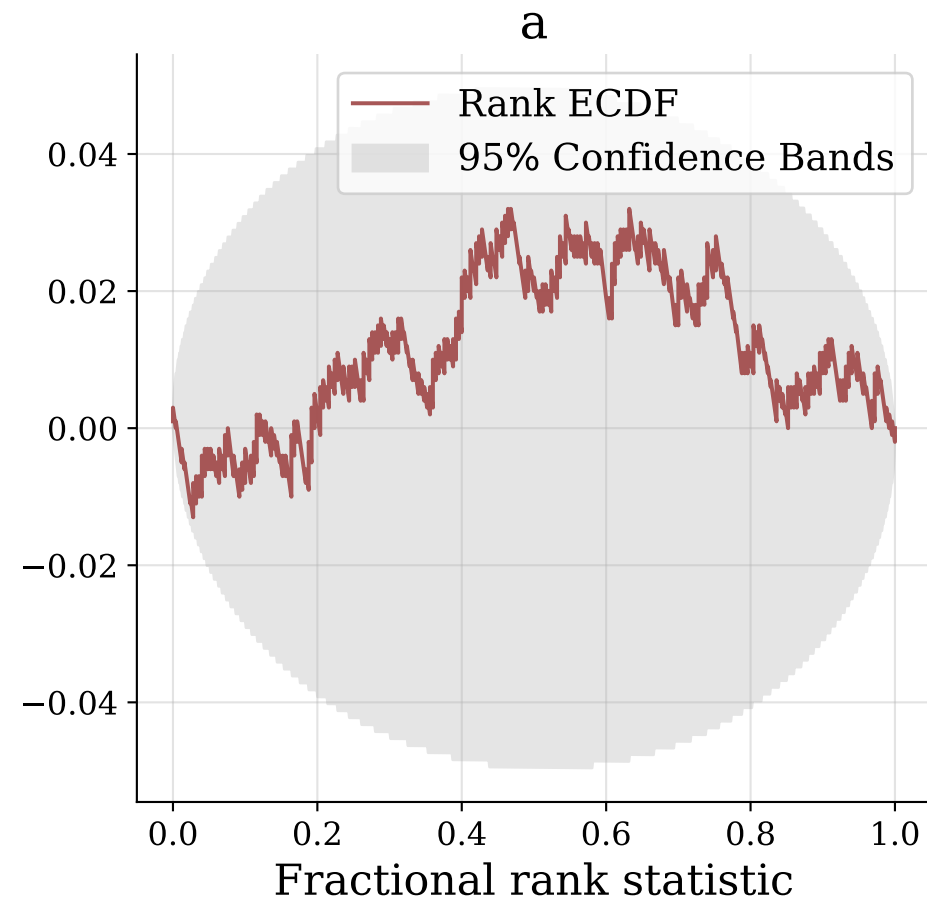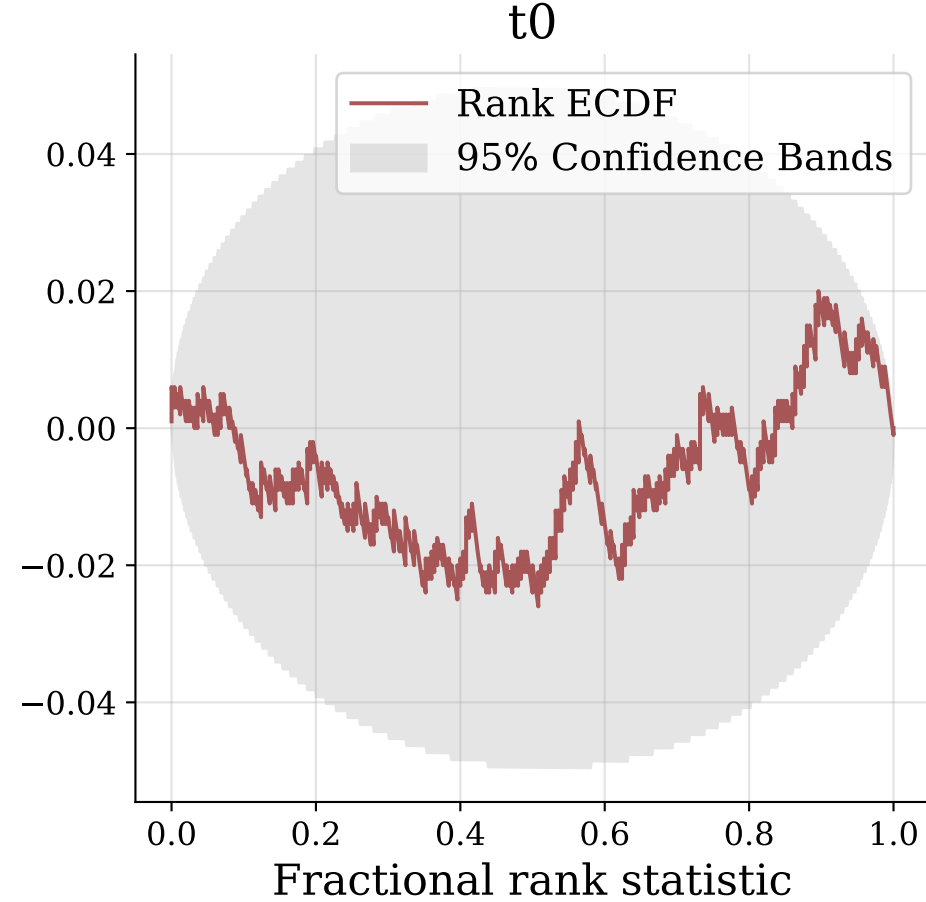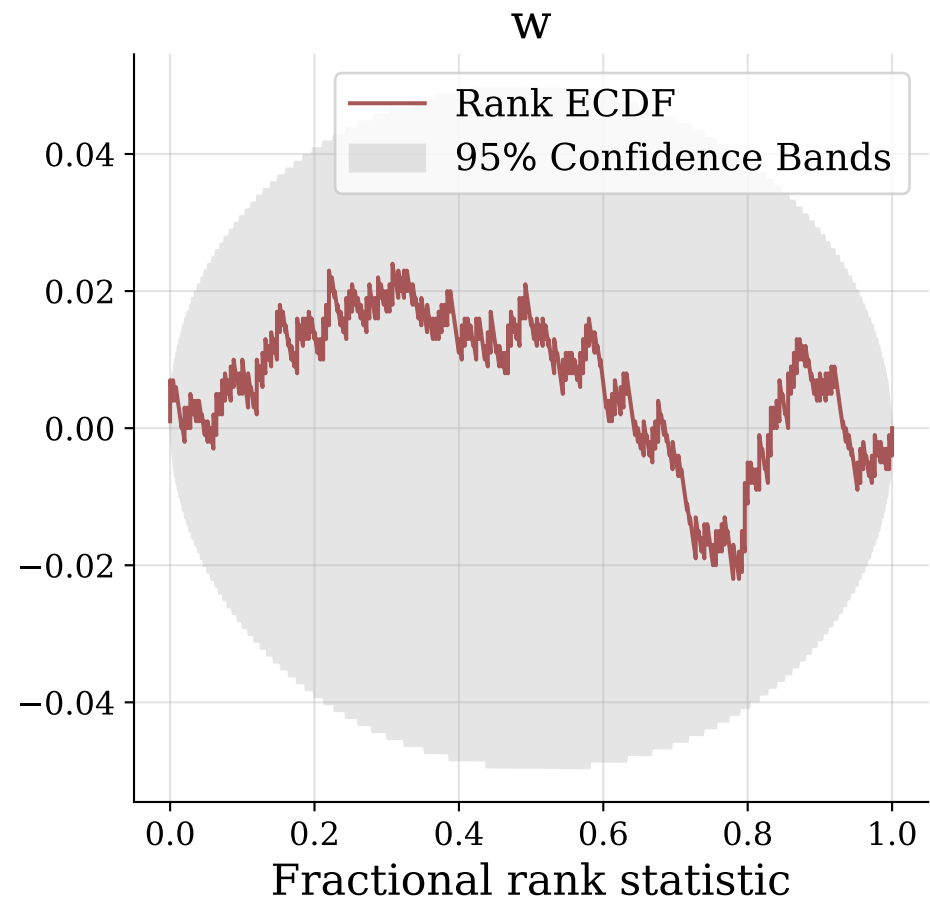

Supplement: supplementary_material [file attachment]

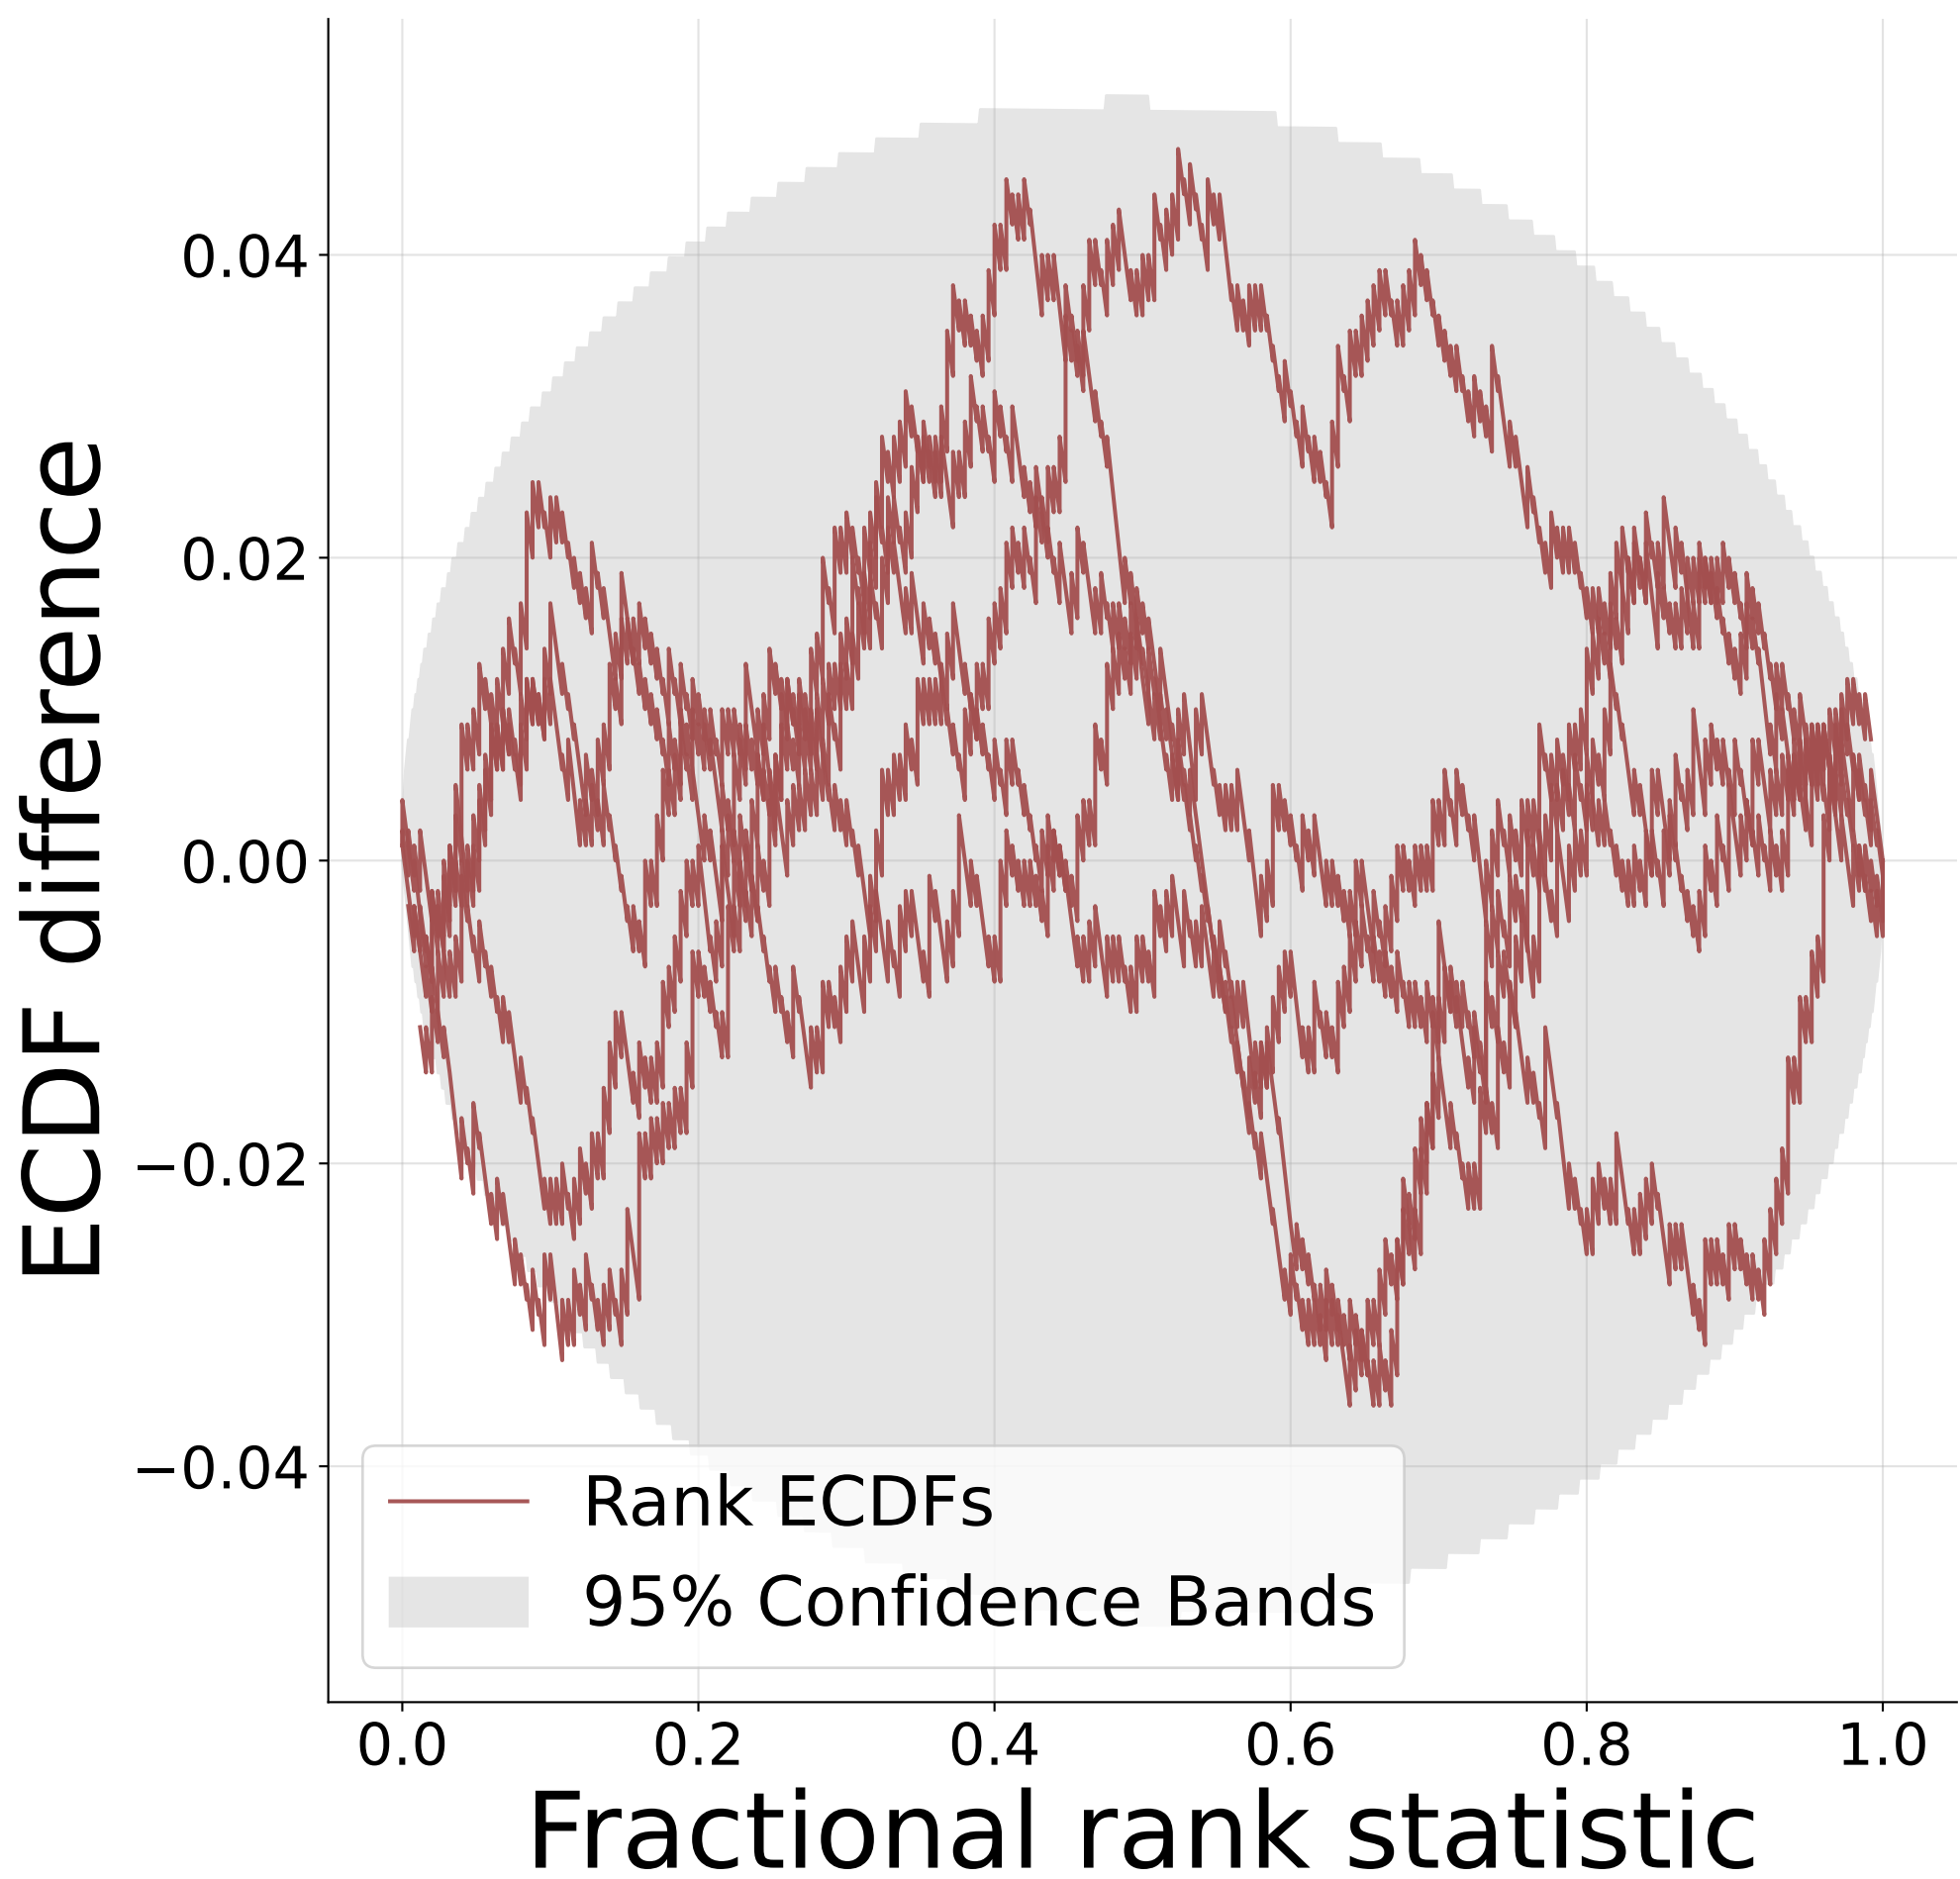

Supplement: supplementary_material [file attachment]

True

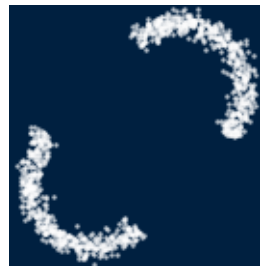

gSMC

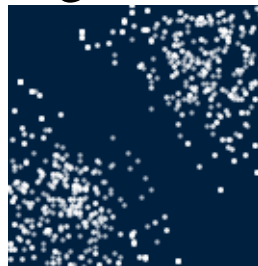

NPE-C

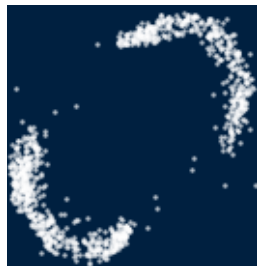

SNL

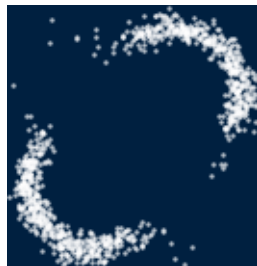

SNRE-B

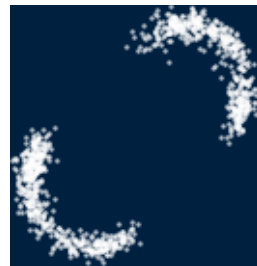

SNPE-C

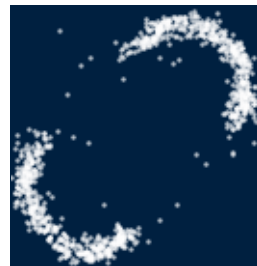

SNVI

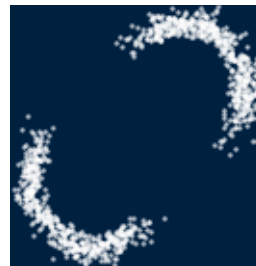

SNPLA

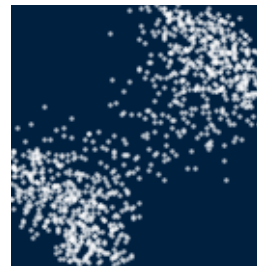

JANA

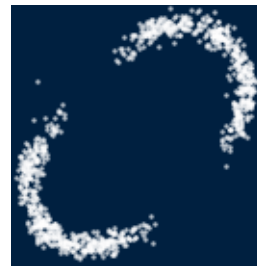 $N = 2000$ 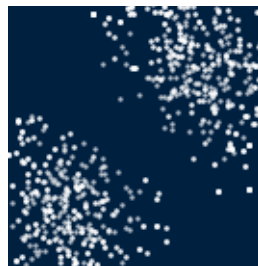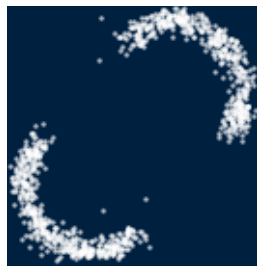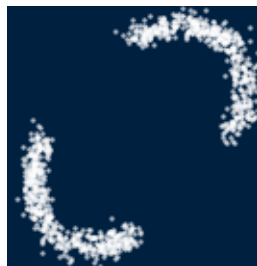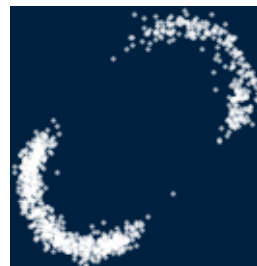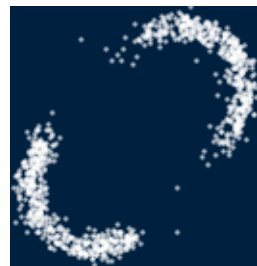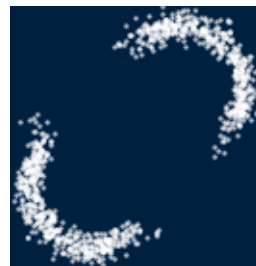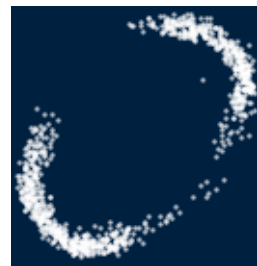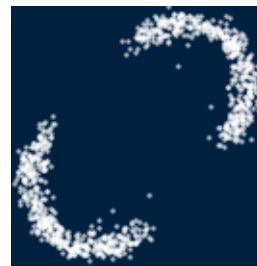 $N = 6000$ 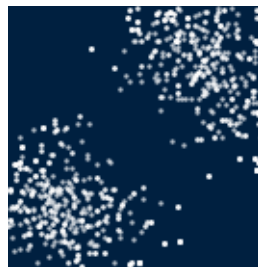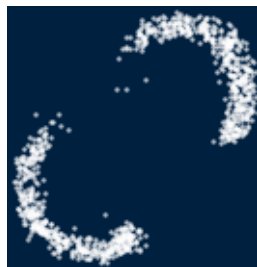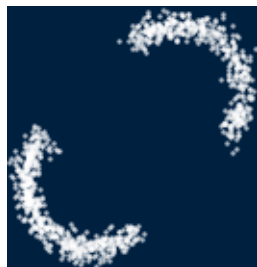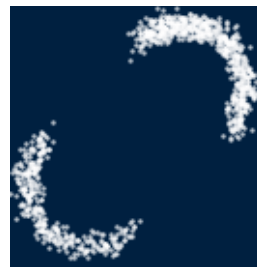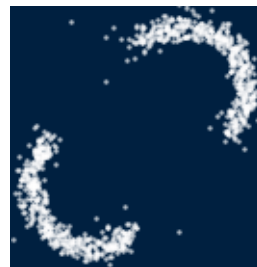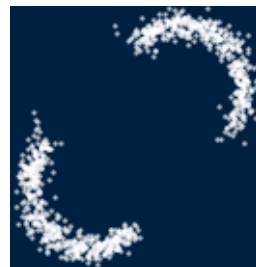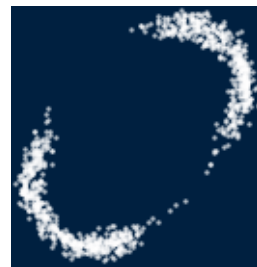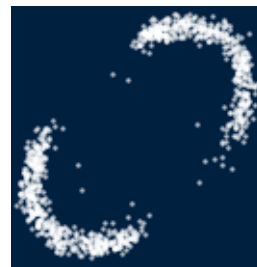 $N = 10000$

Supplement: supplementary_material [file attachment]

Surrogate

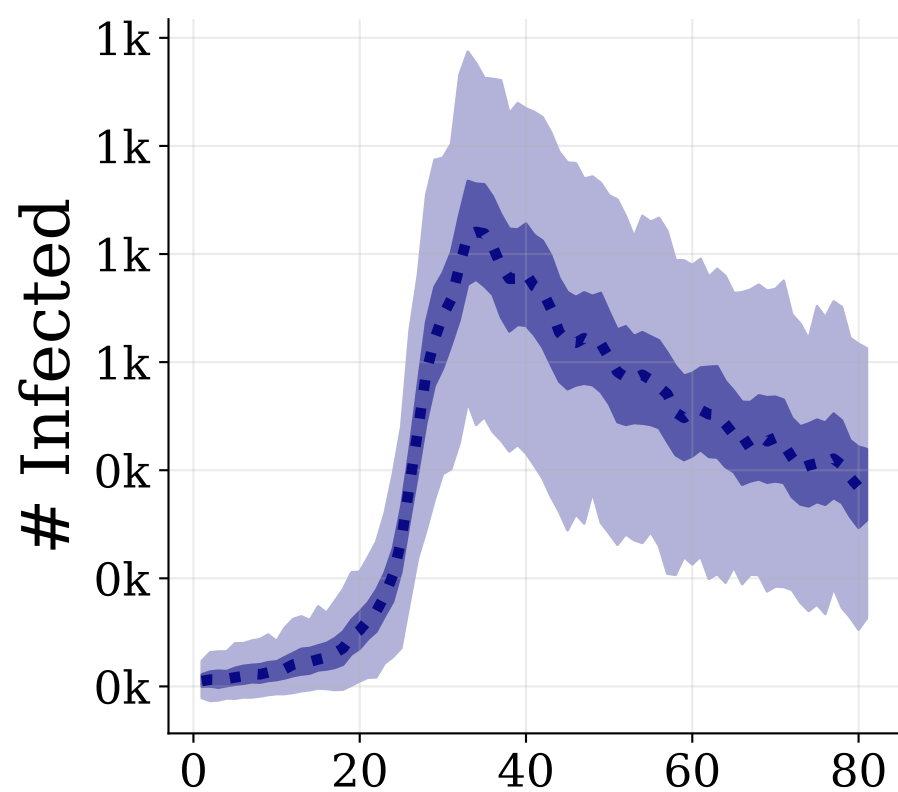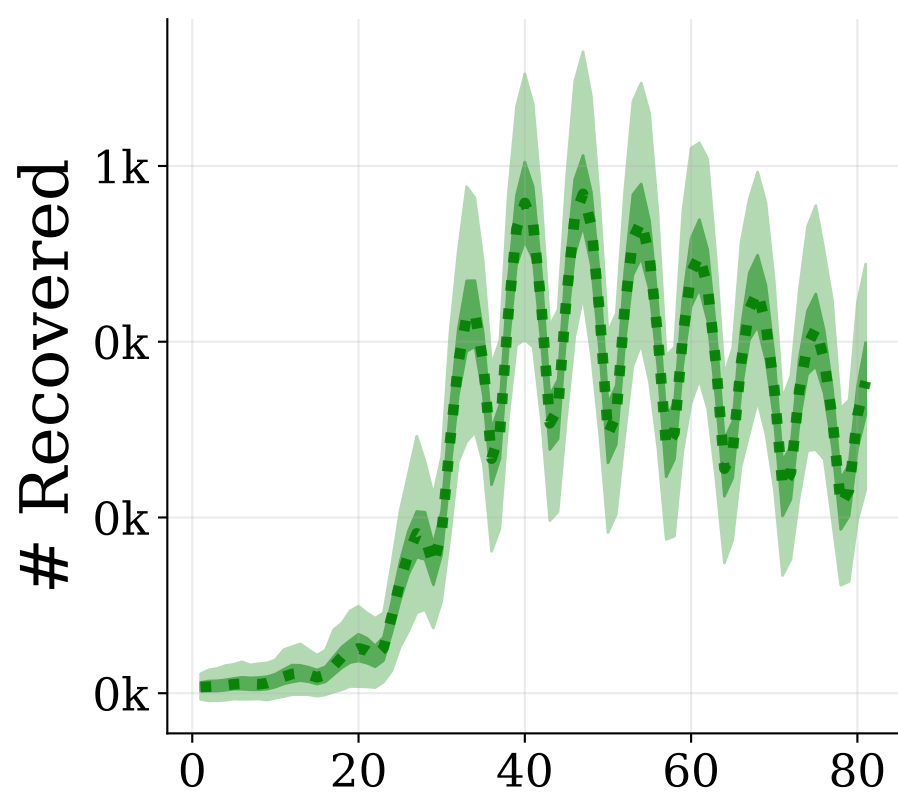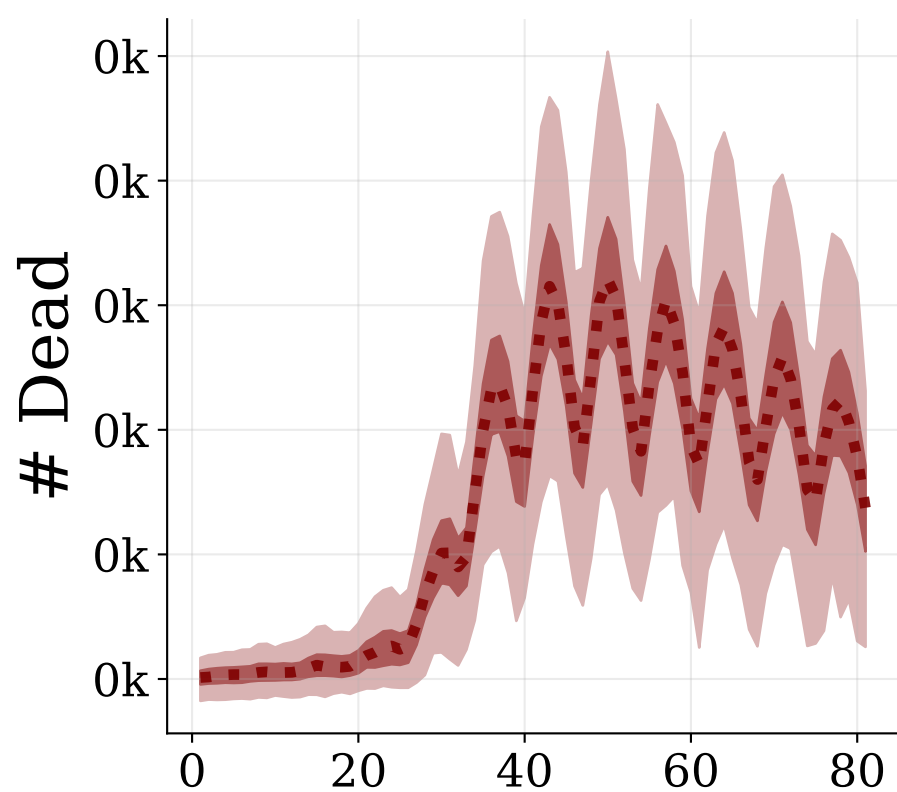

Simulator

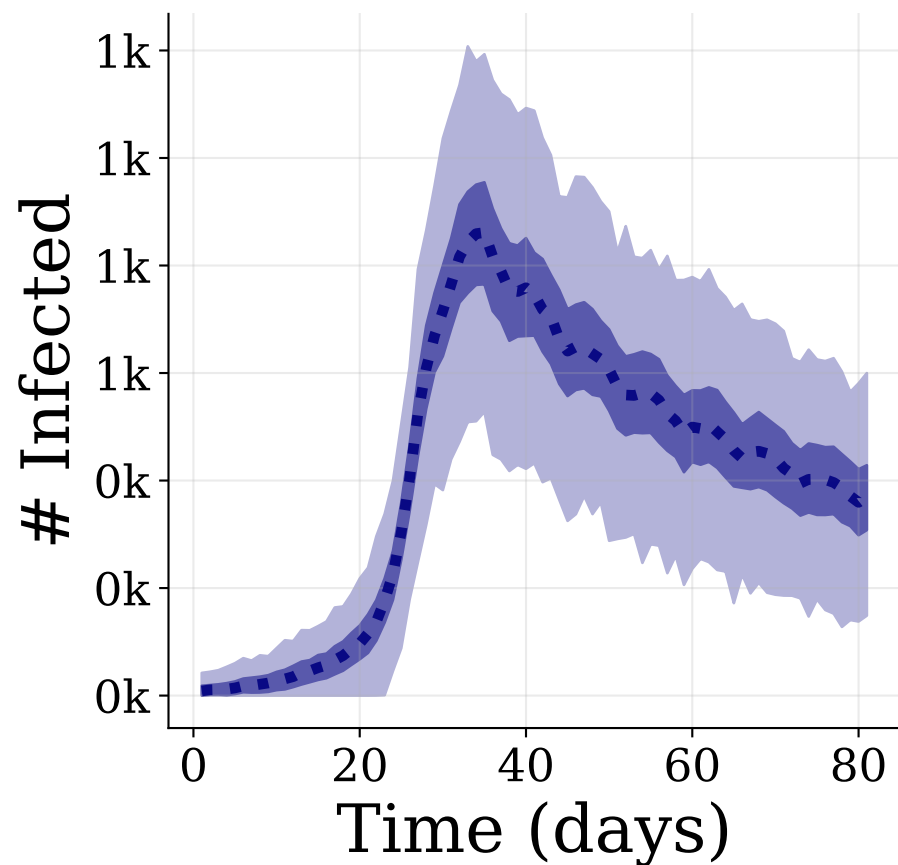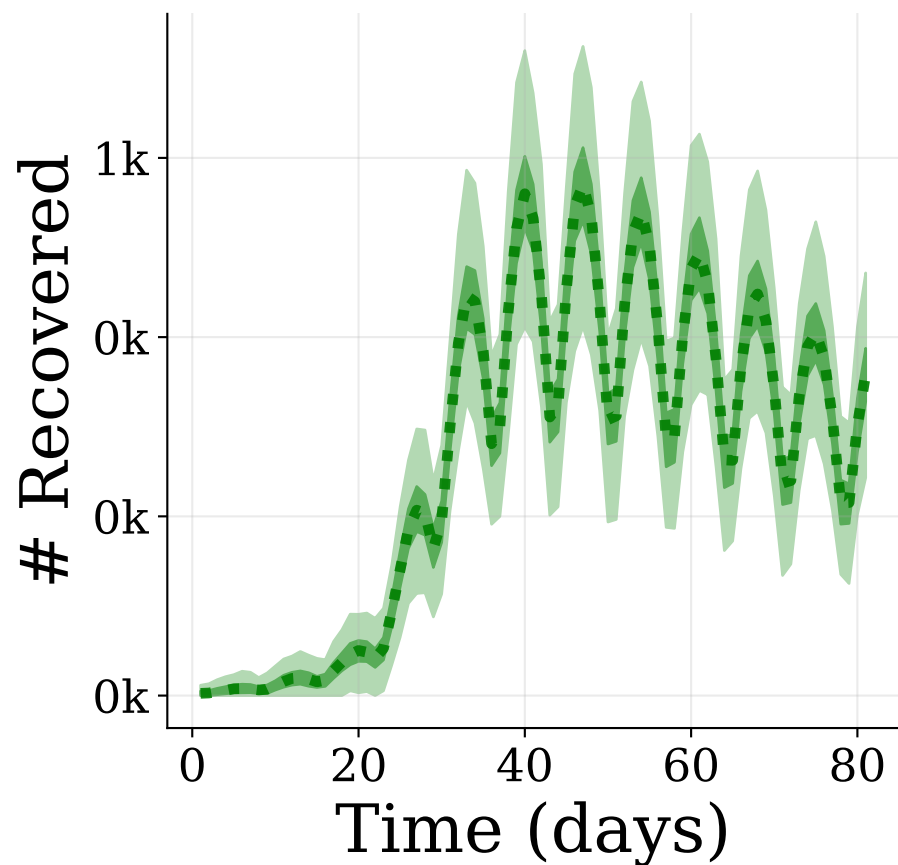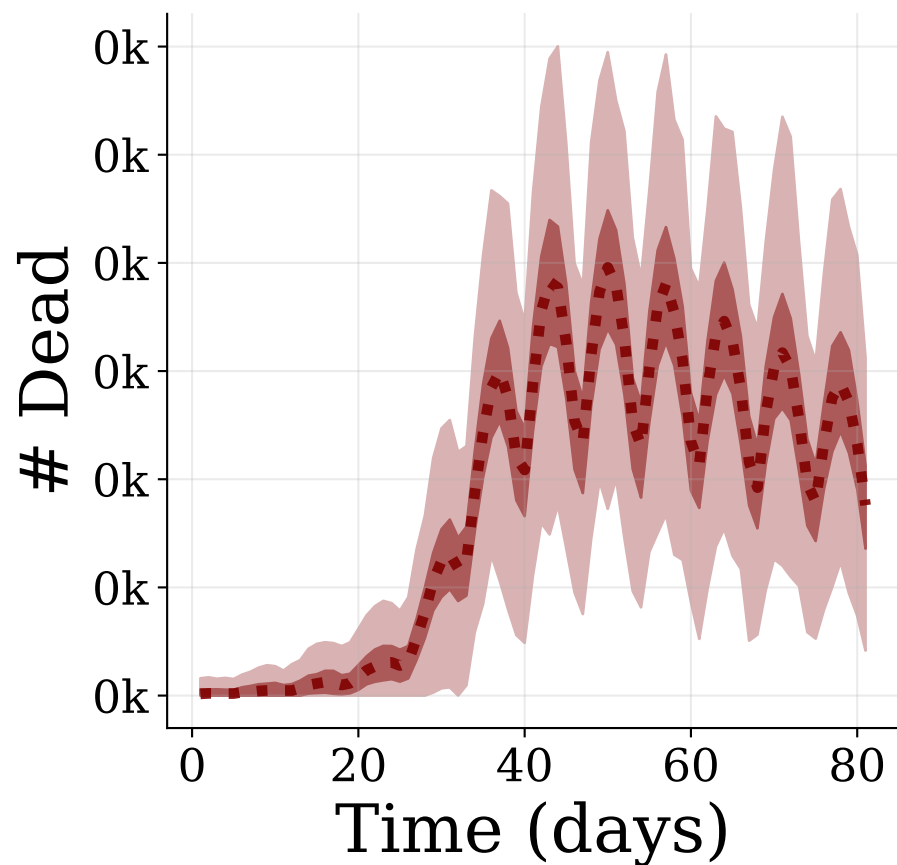

Supplement: supplementary_material [file attachment]

True



NPE-C

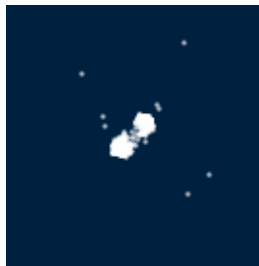

## SNRE-B

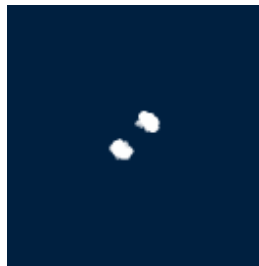

SNPE-C

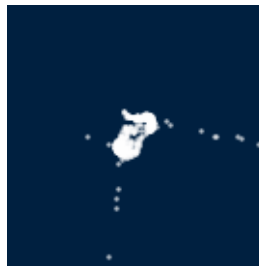

SNVI

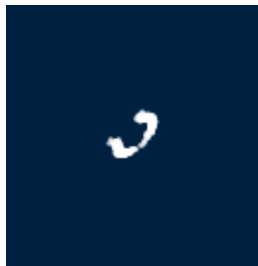

SNPLA

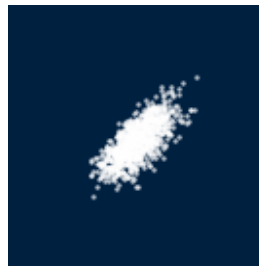

# JANA

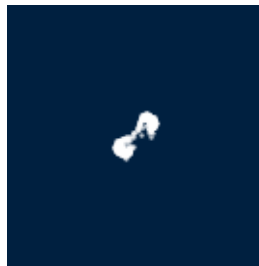
$$N = 2000$$
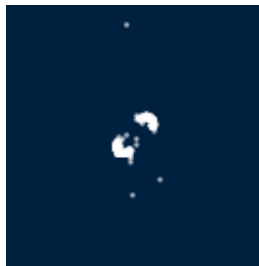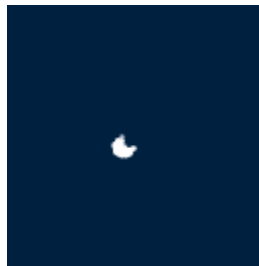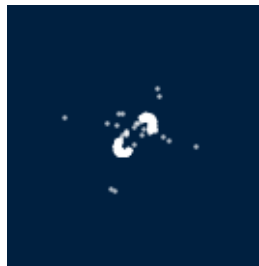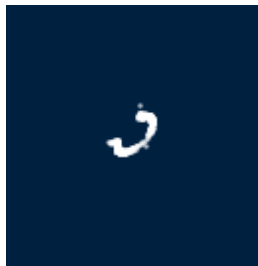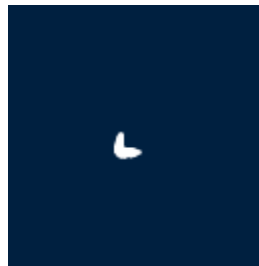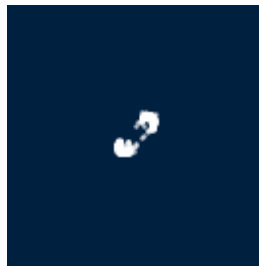
$$N = 6000$$
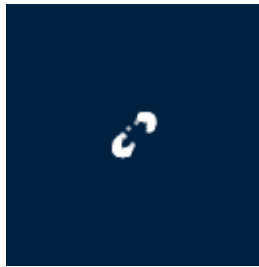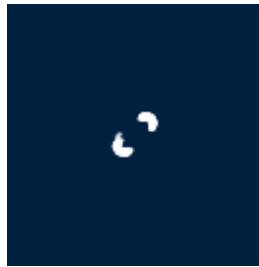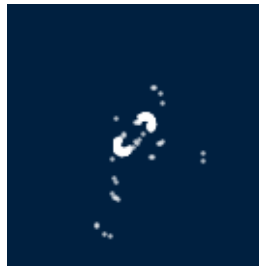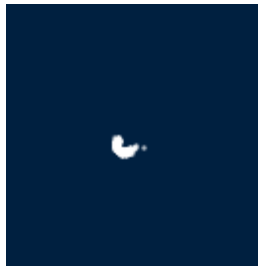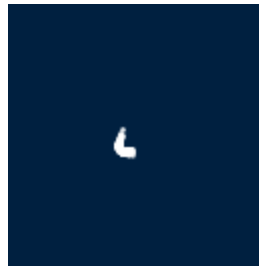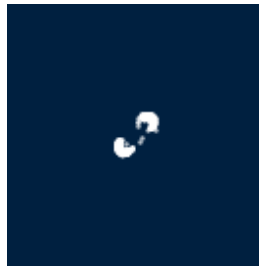
$$\underline{N = 10000}$$

Supplement: supplementary_material [file attachment]

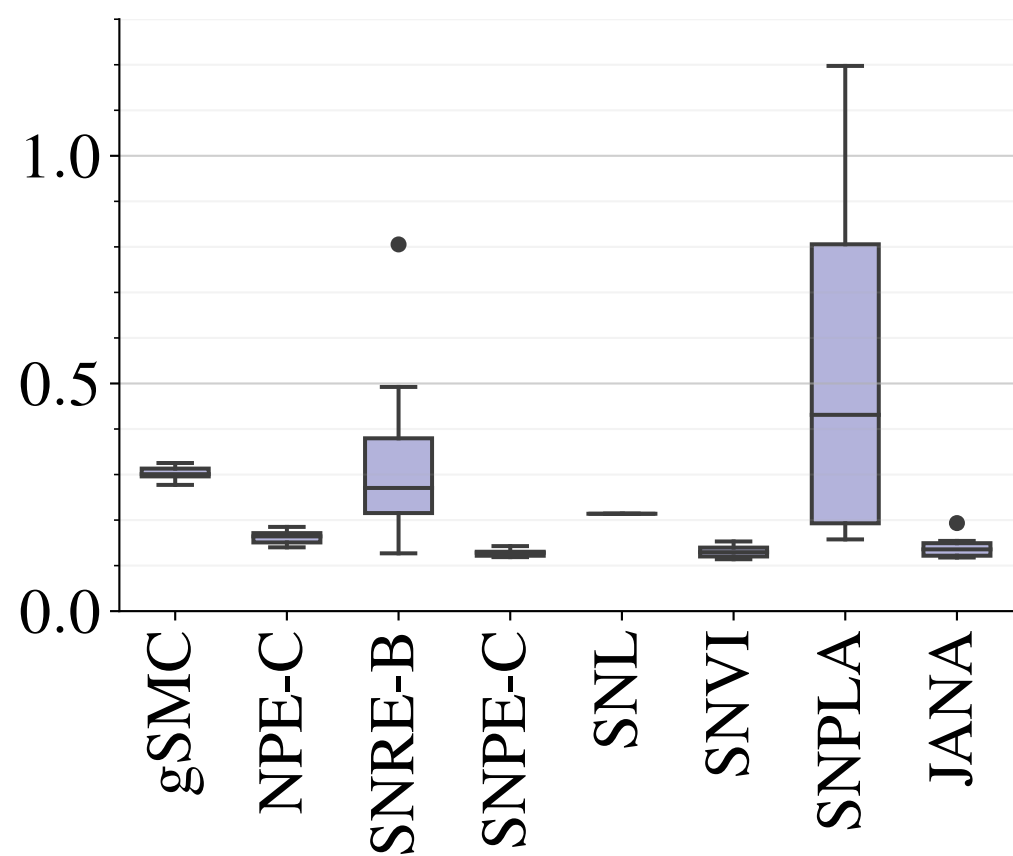

Supplement: supplementary_material [file attachment]

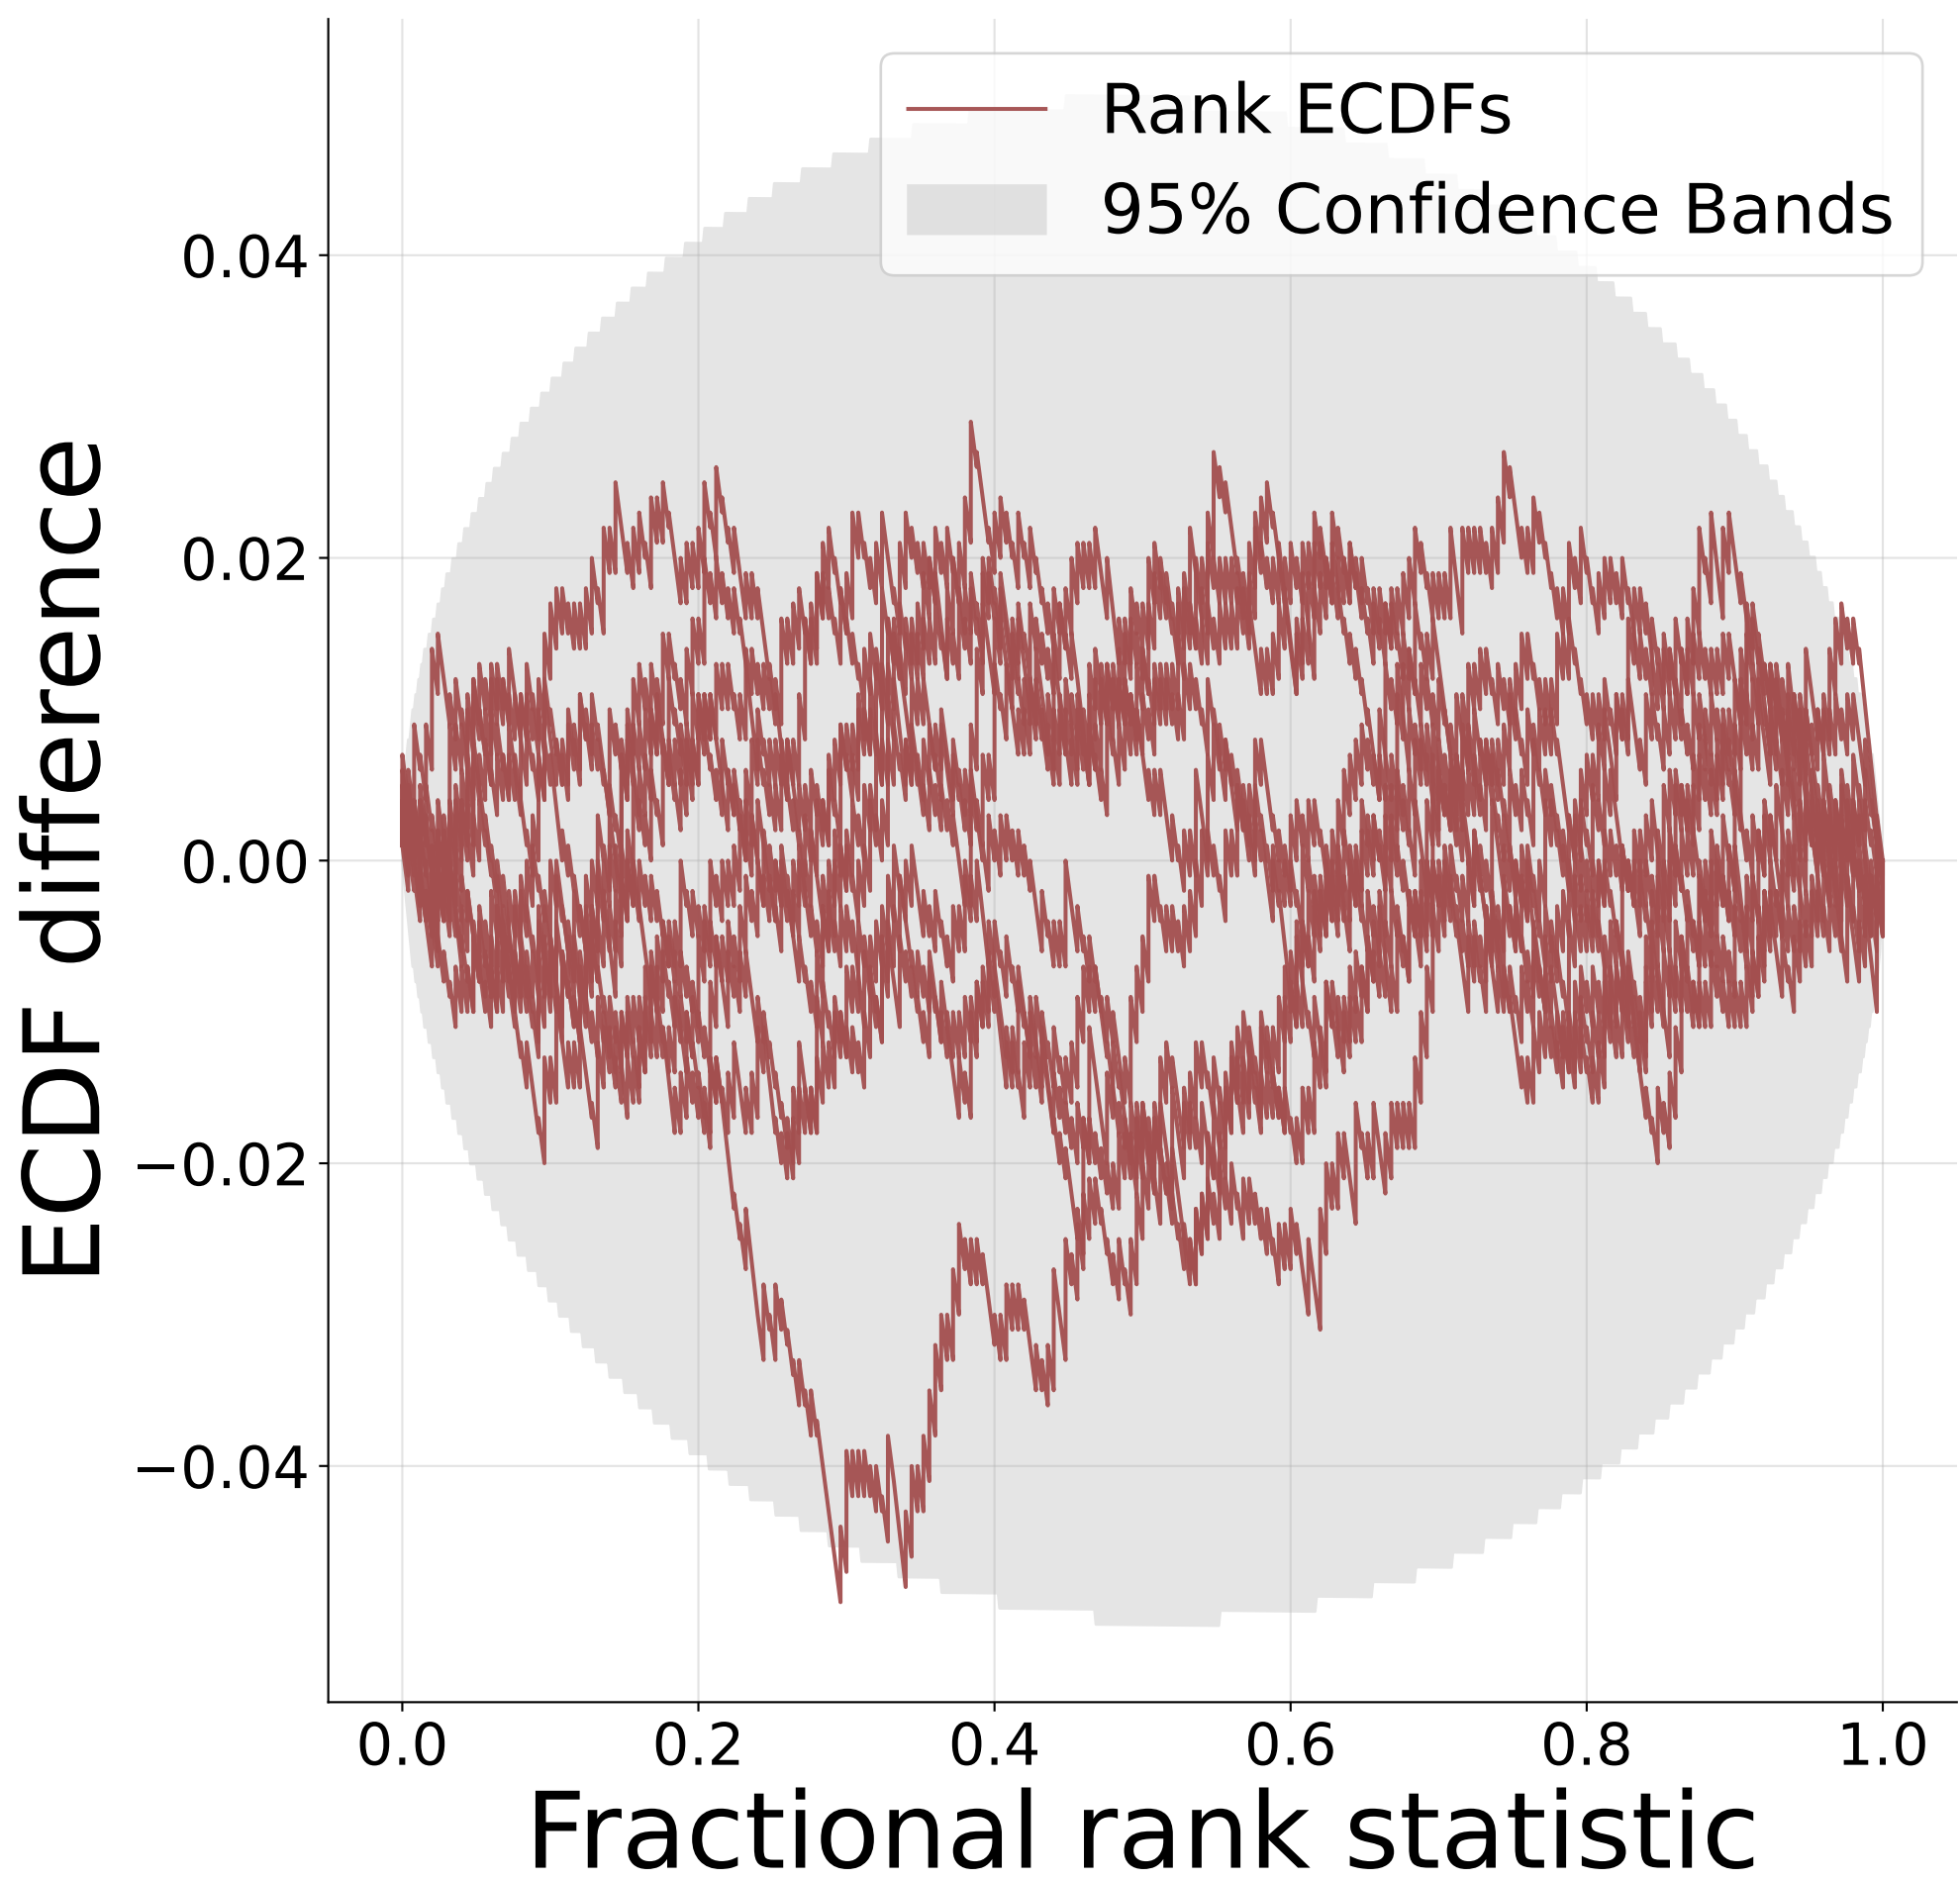

Supplement: supplementary_material [file attachment]

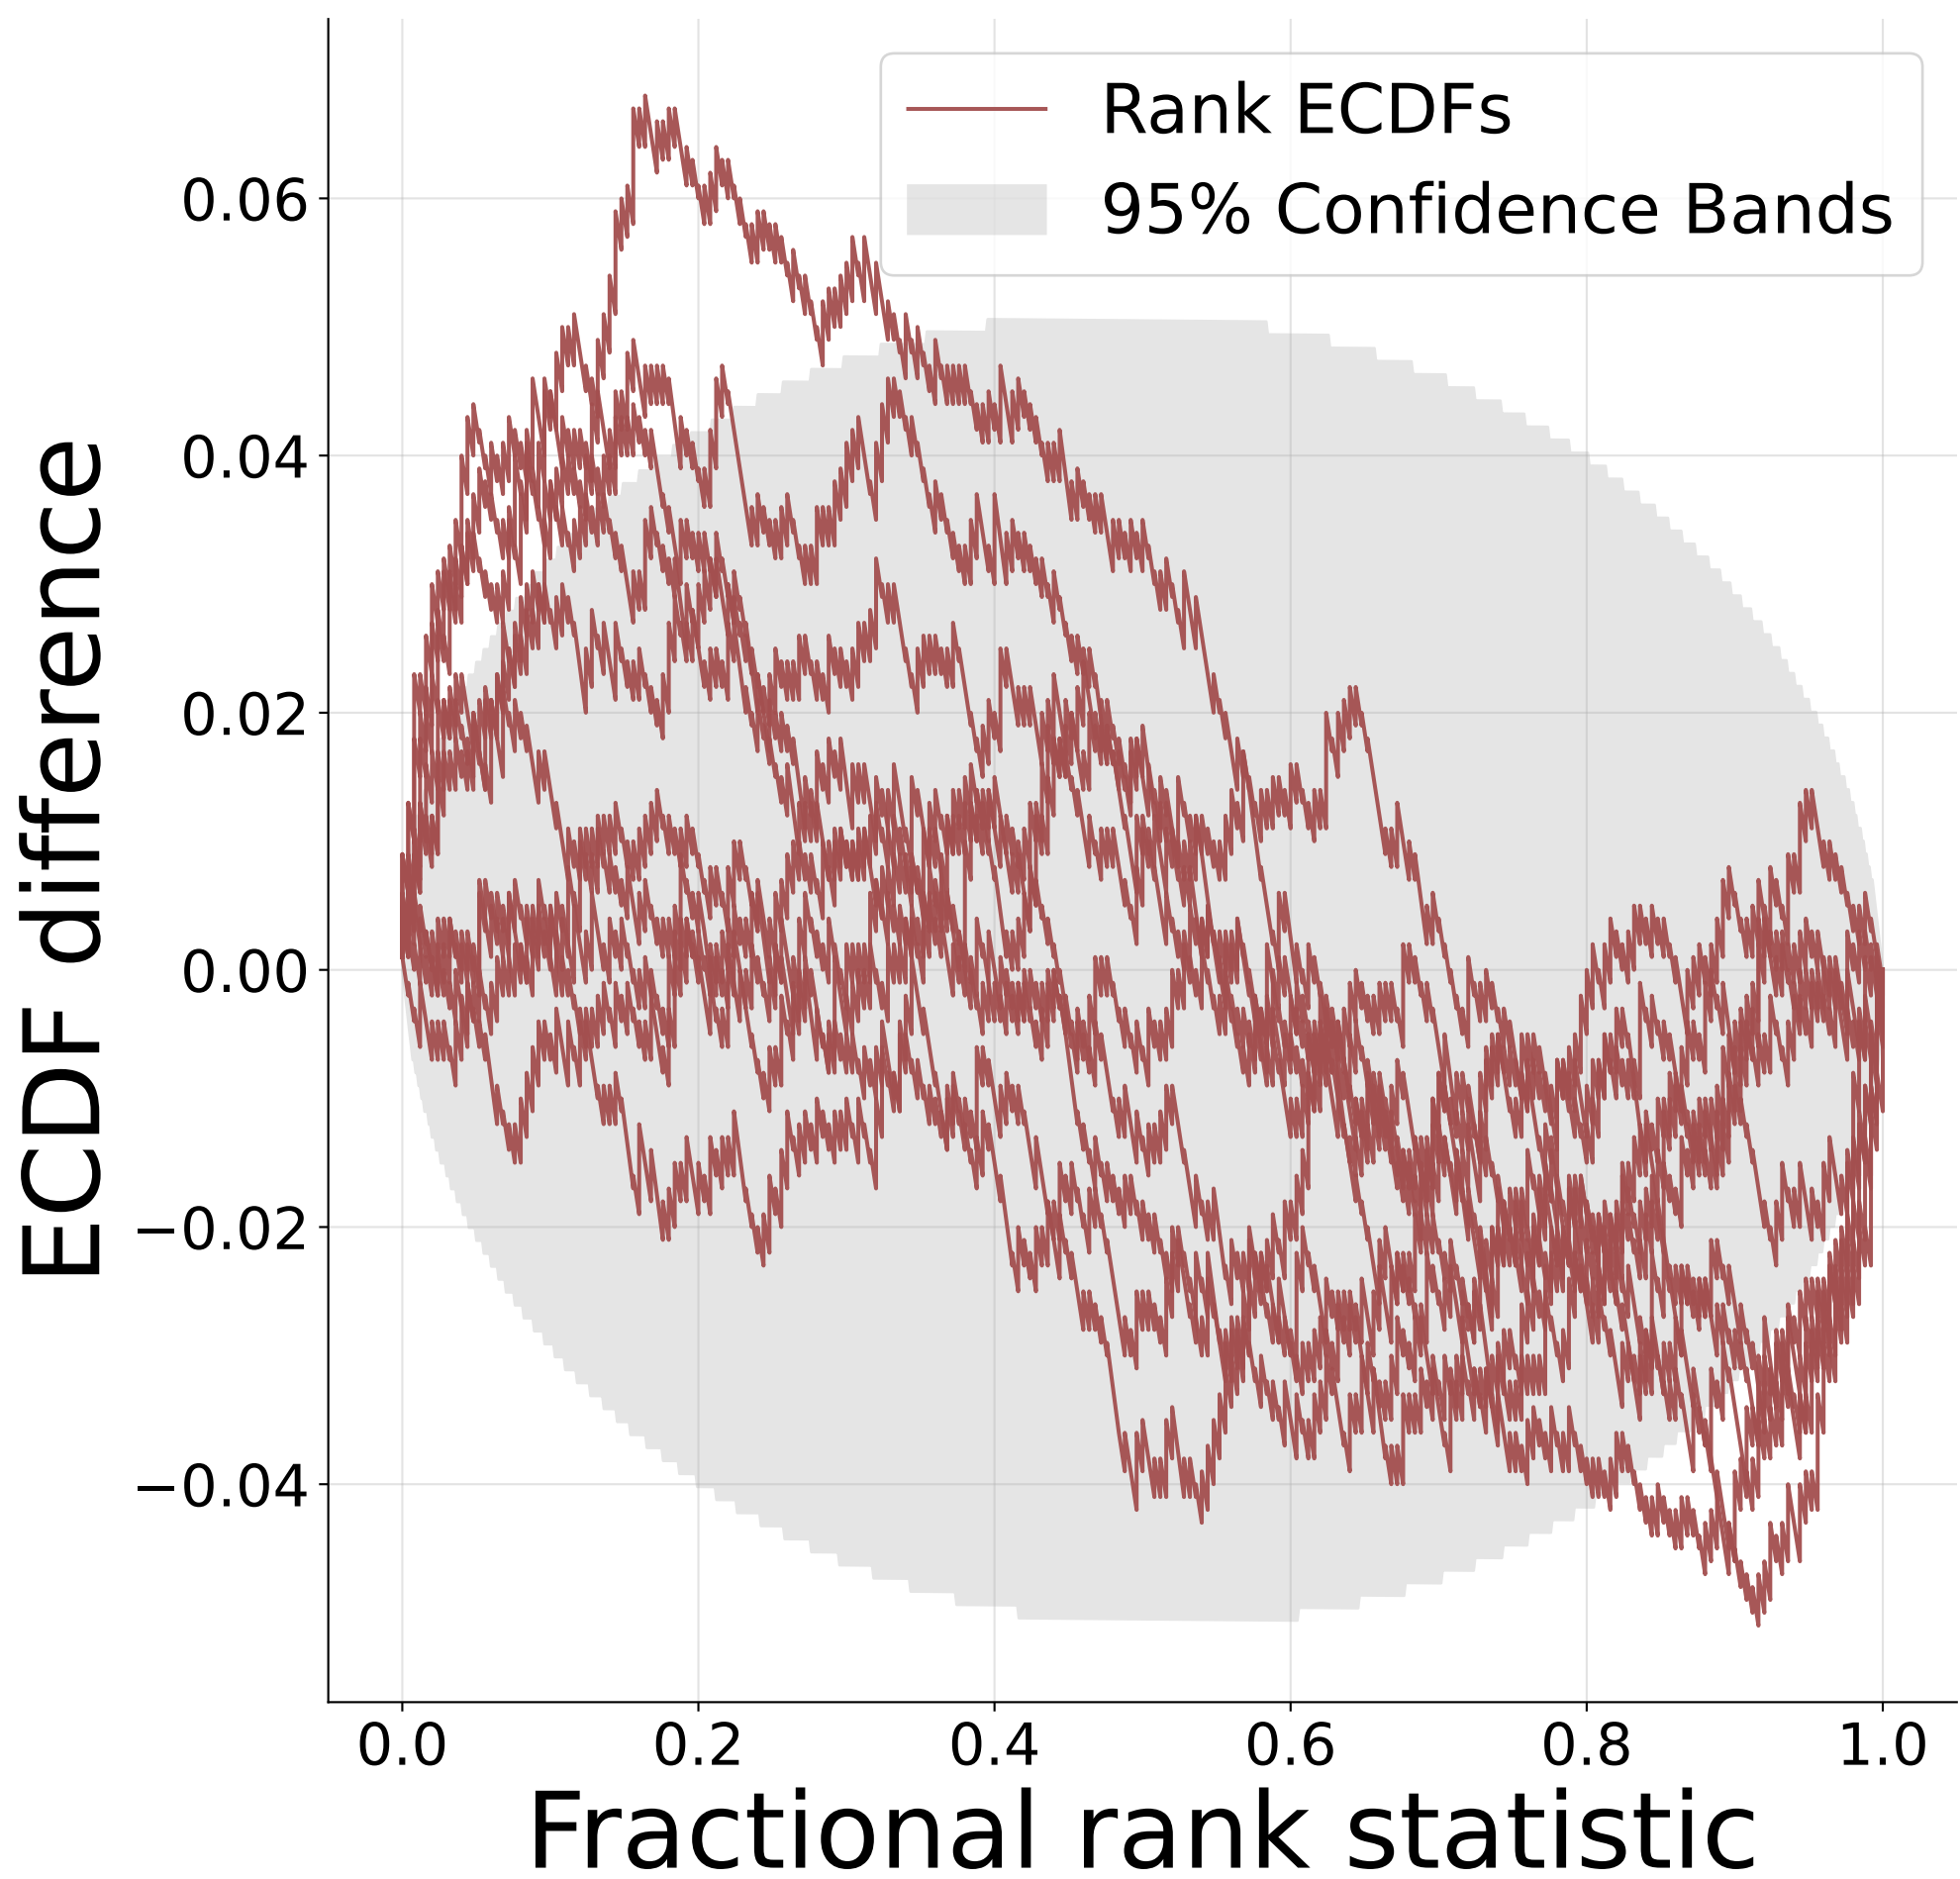

Supplement: supplementary_material [file attachment]

Surrogate

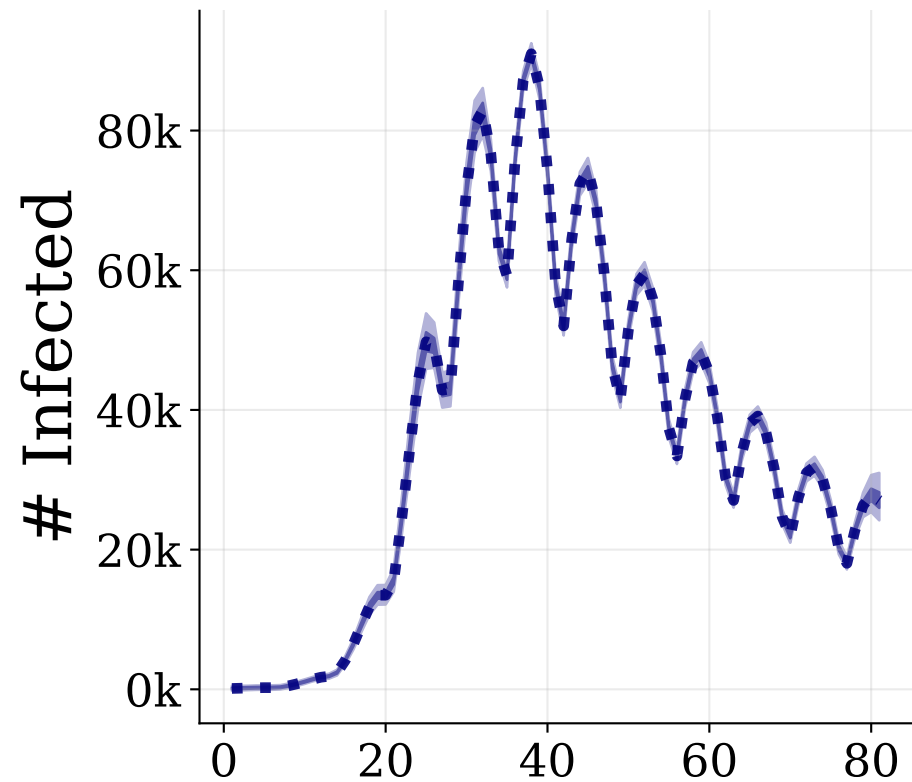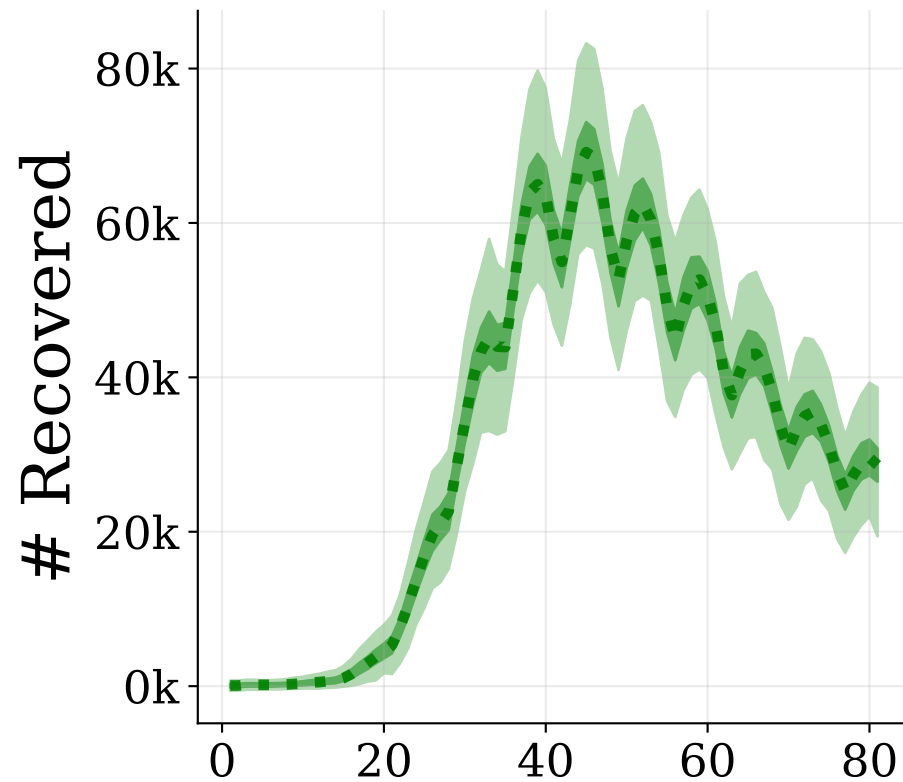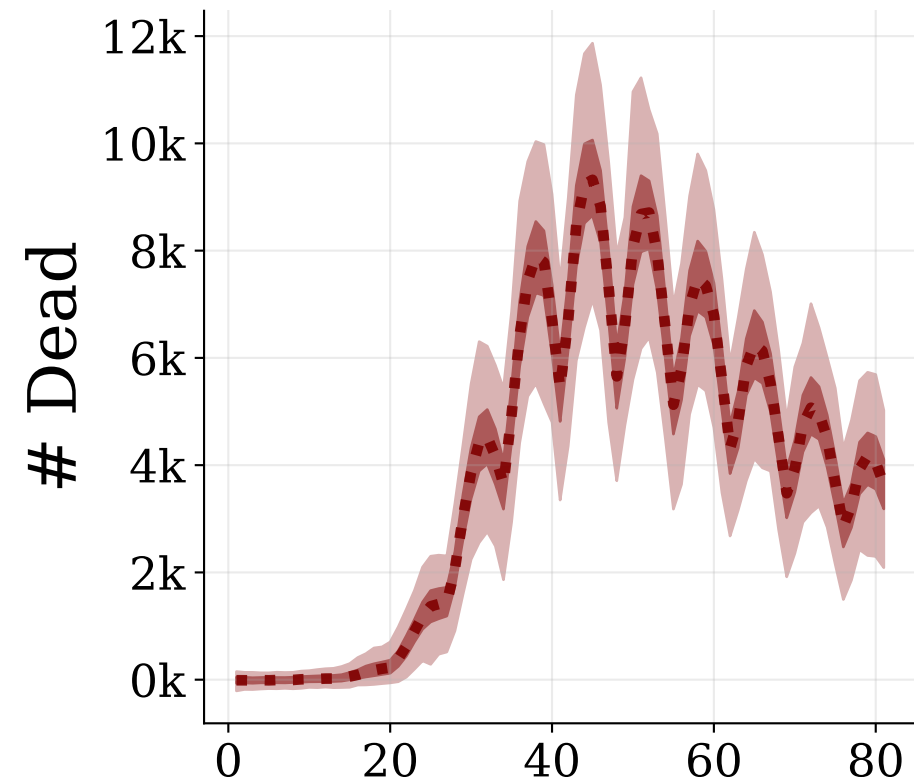

Simulator

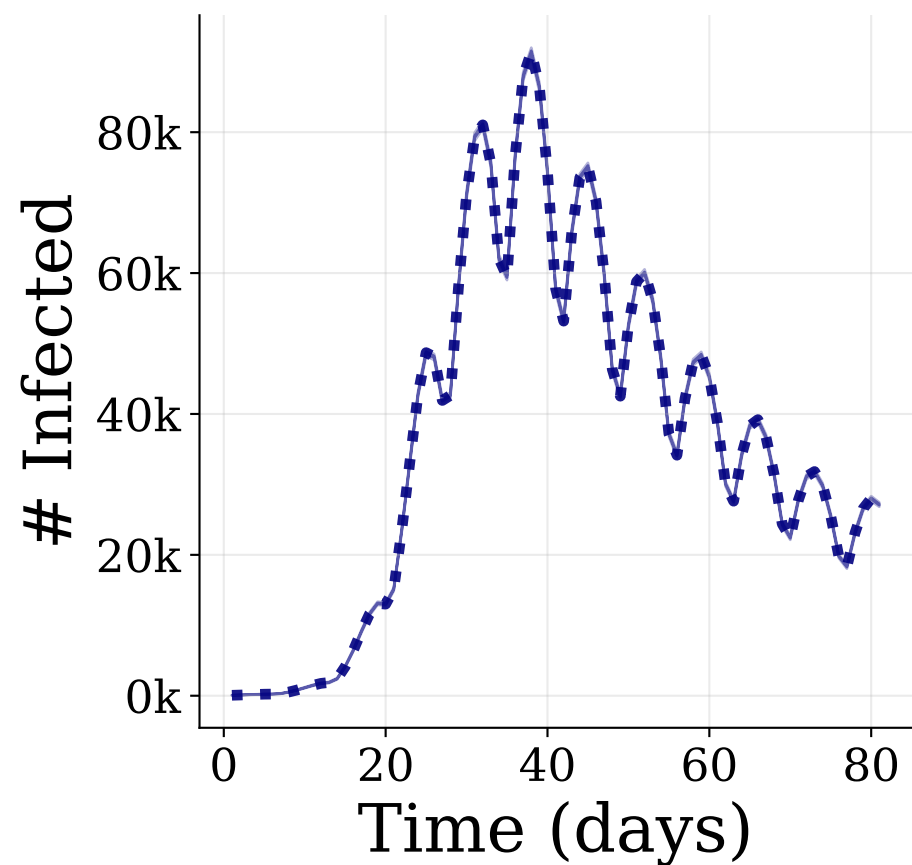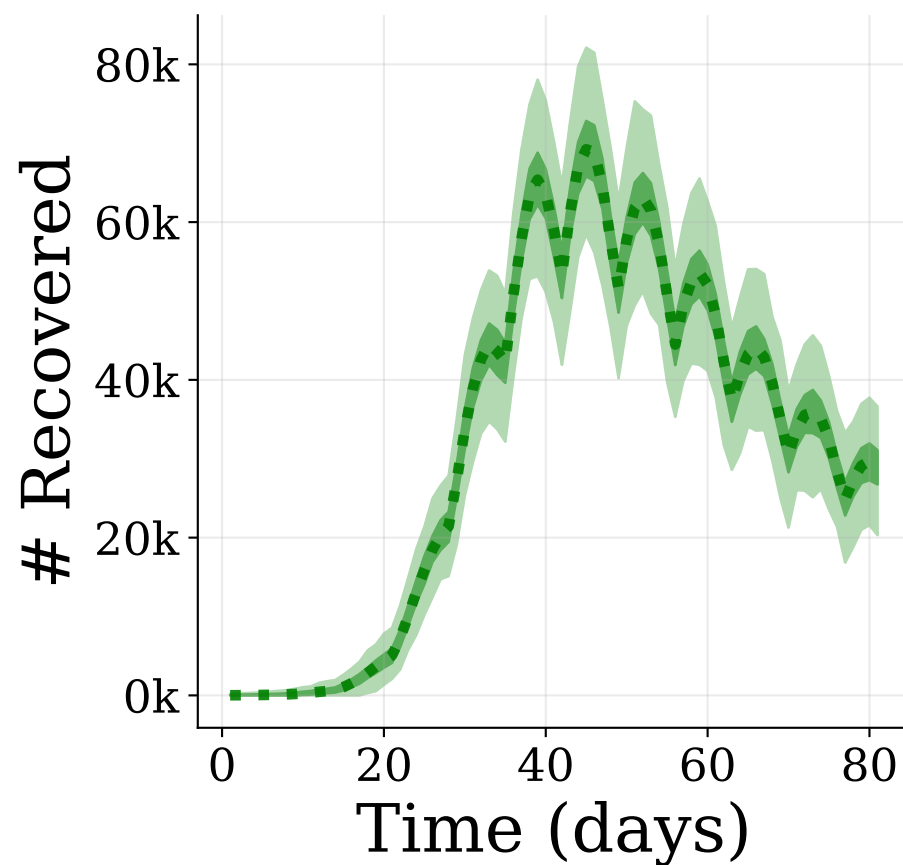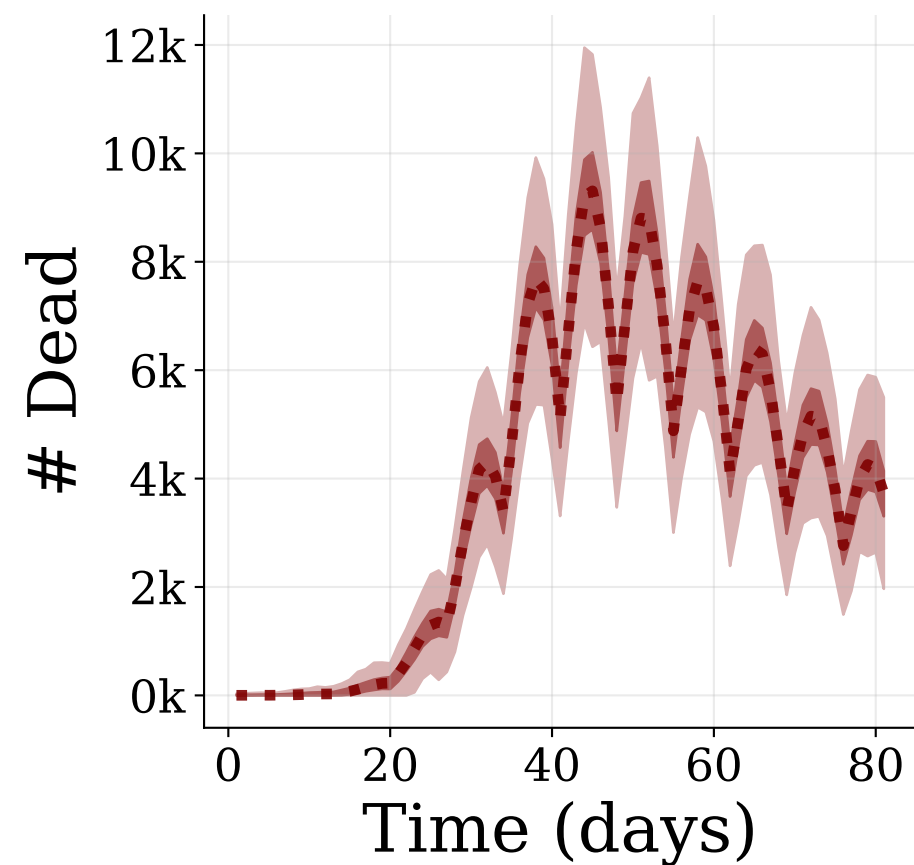

Supplement: supplementary_material [file attachment]

Post.Loss

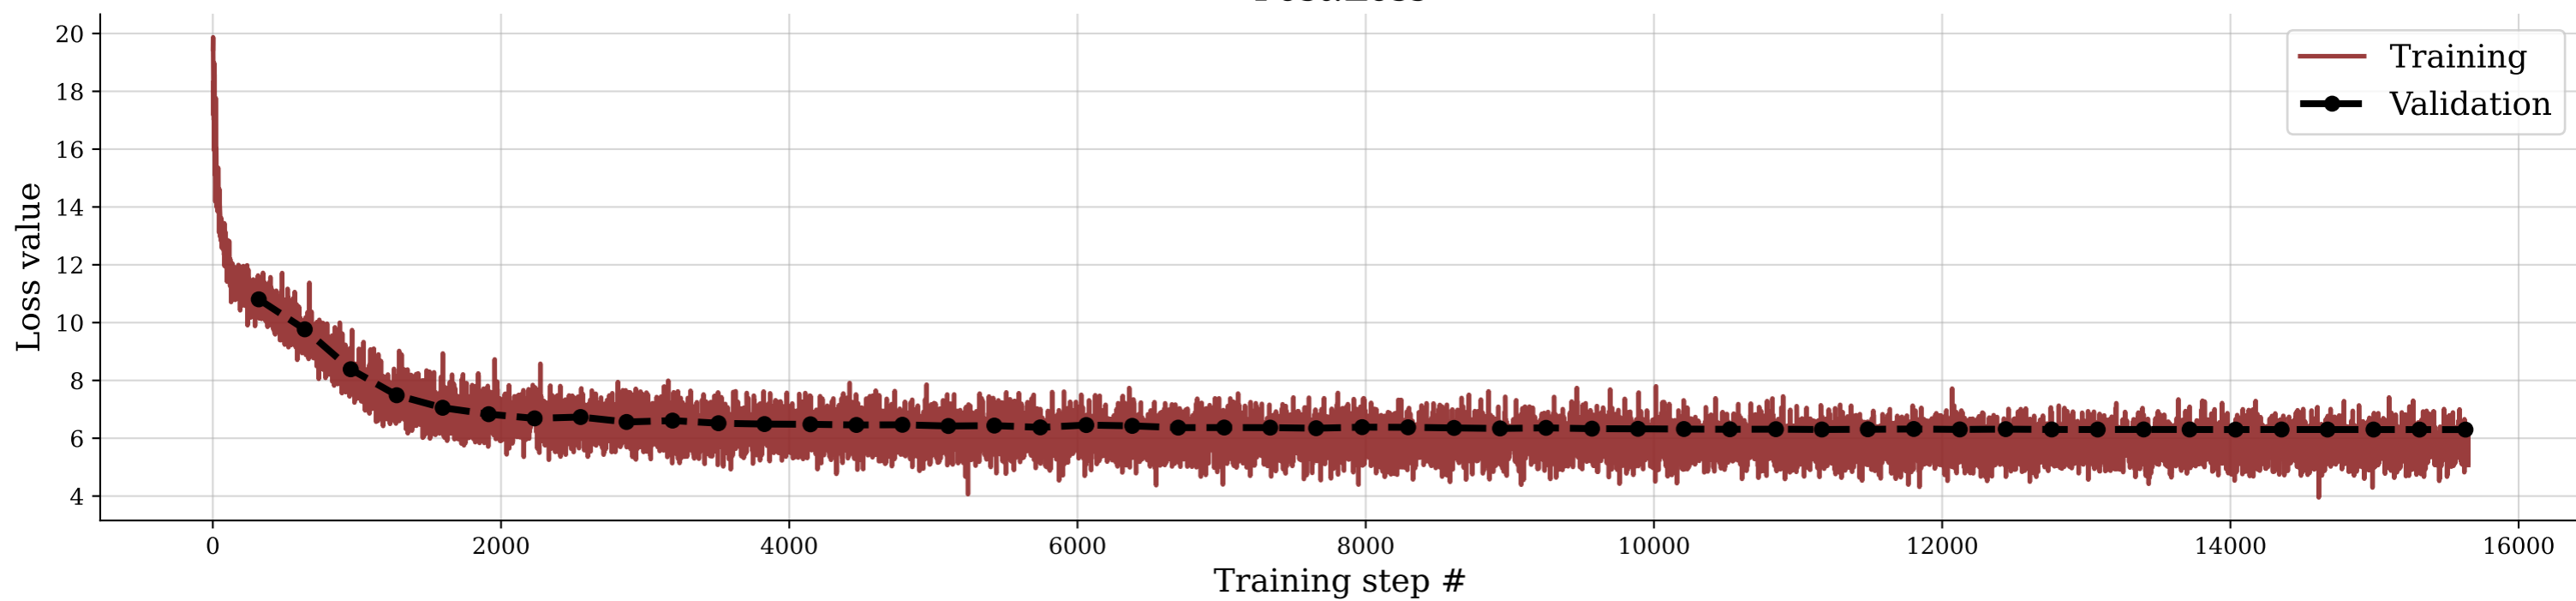

Lik.Loss

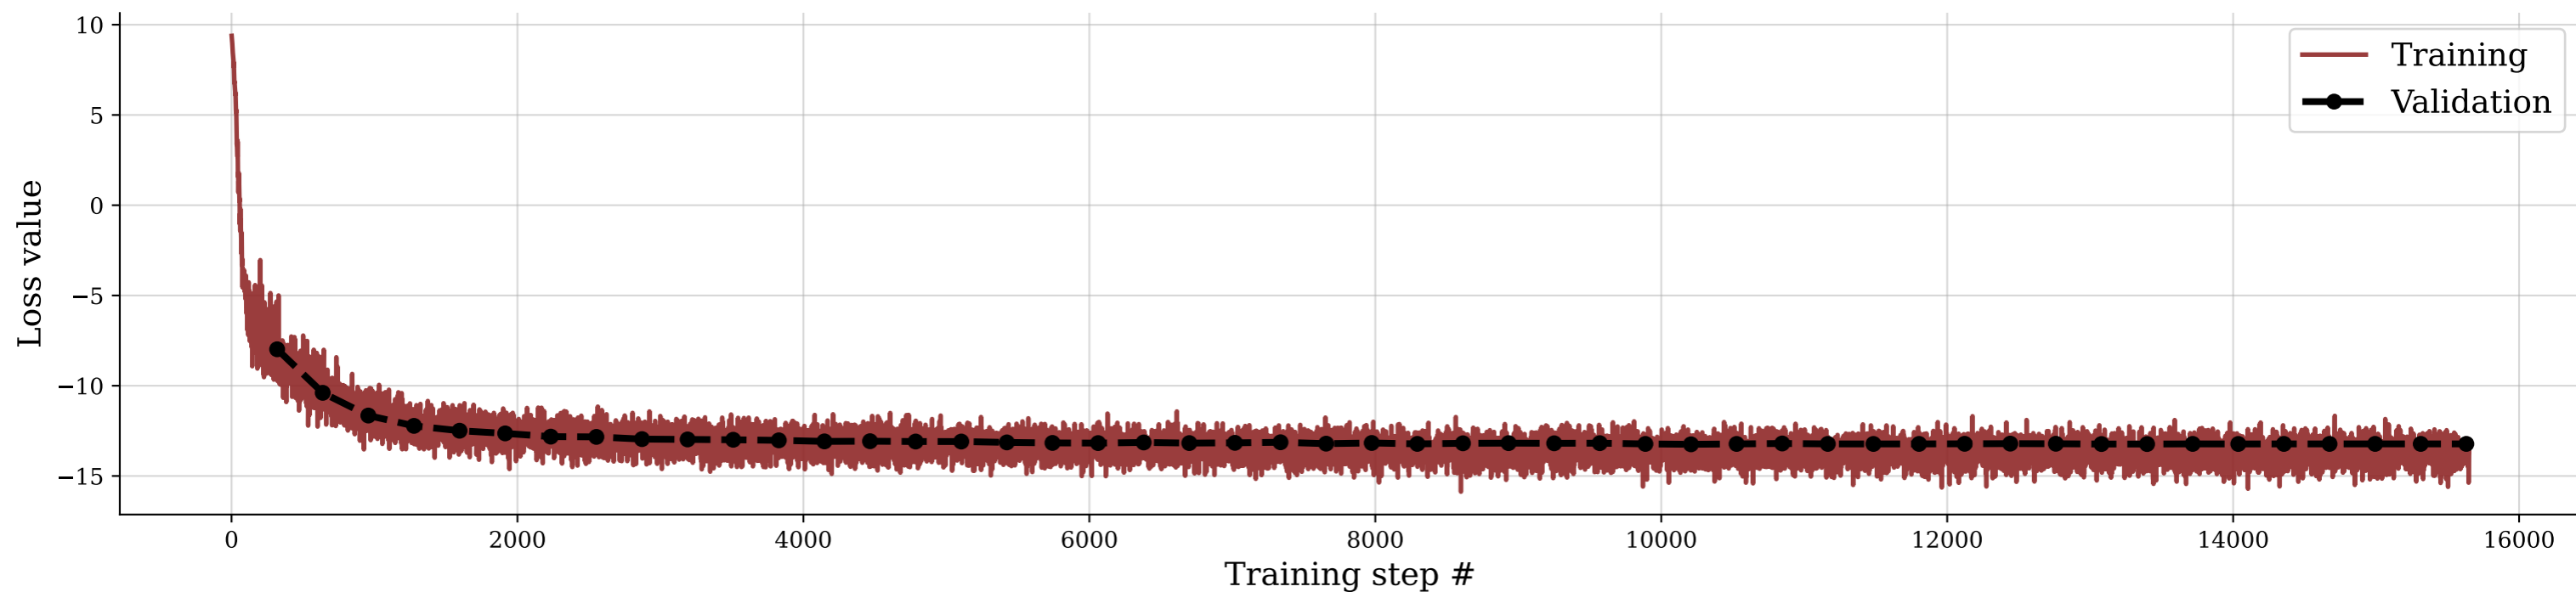

W.Decay

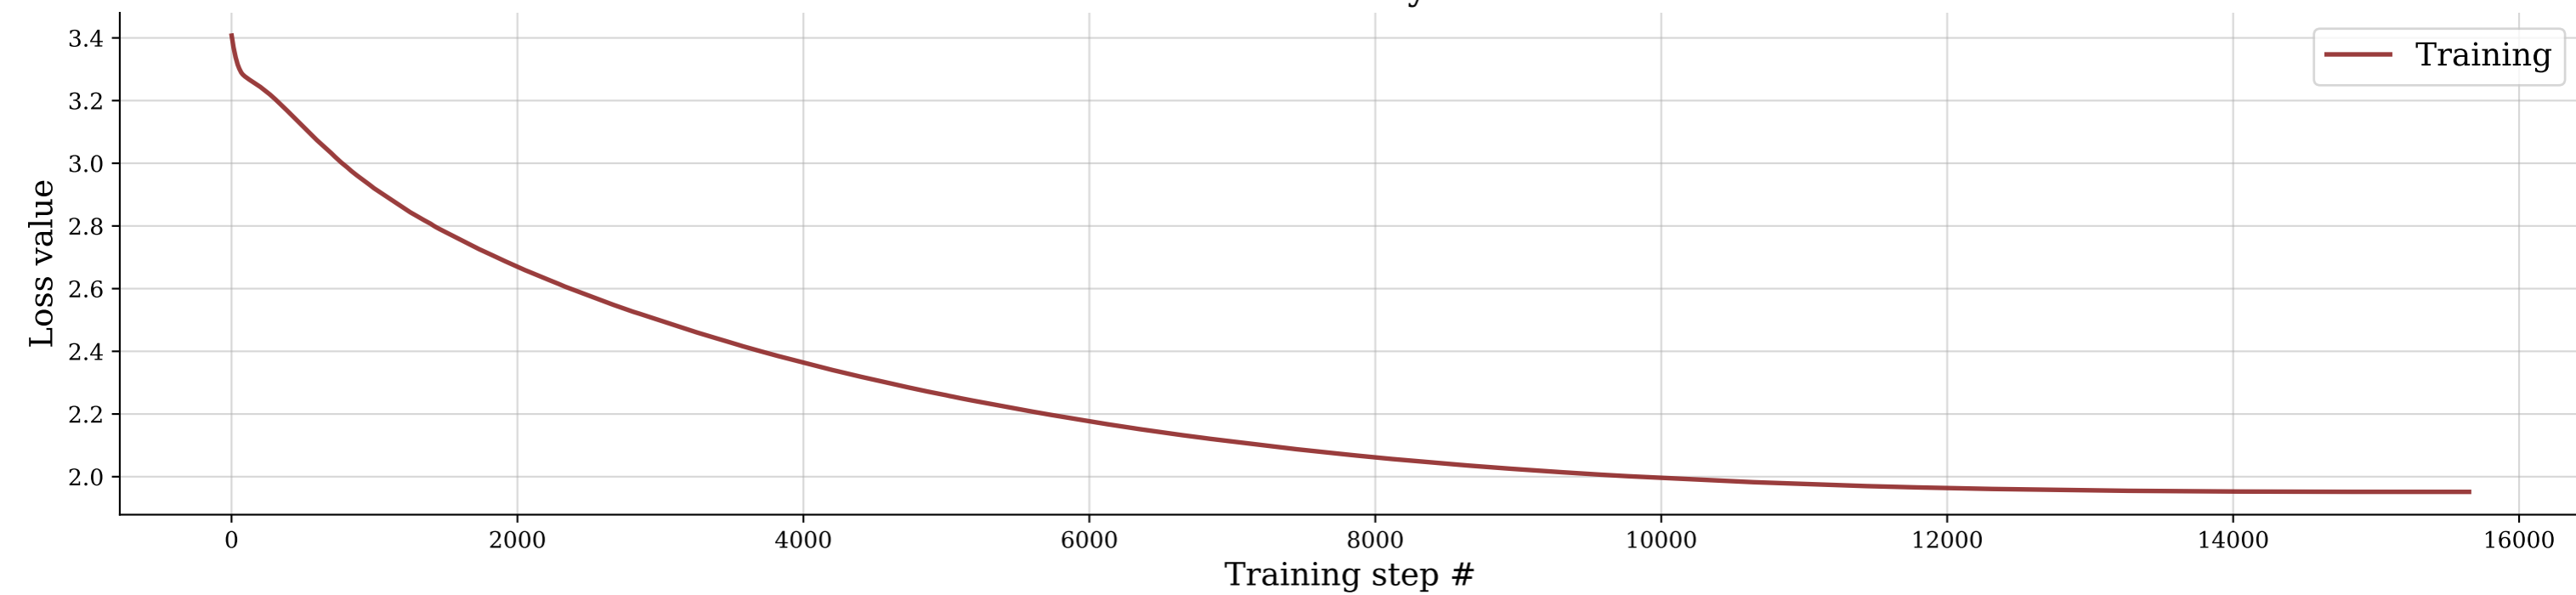

Supplement: supplementary_material [file attachment]

Likelihood density

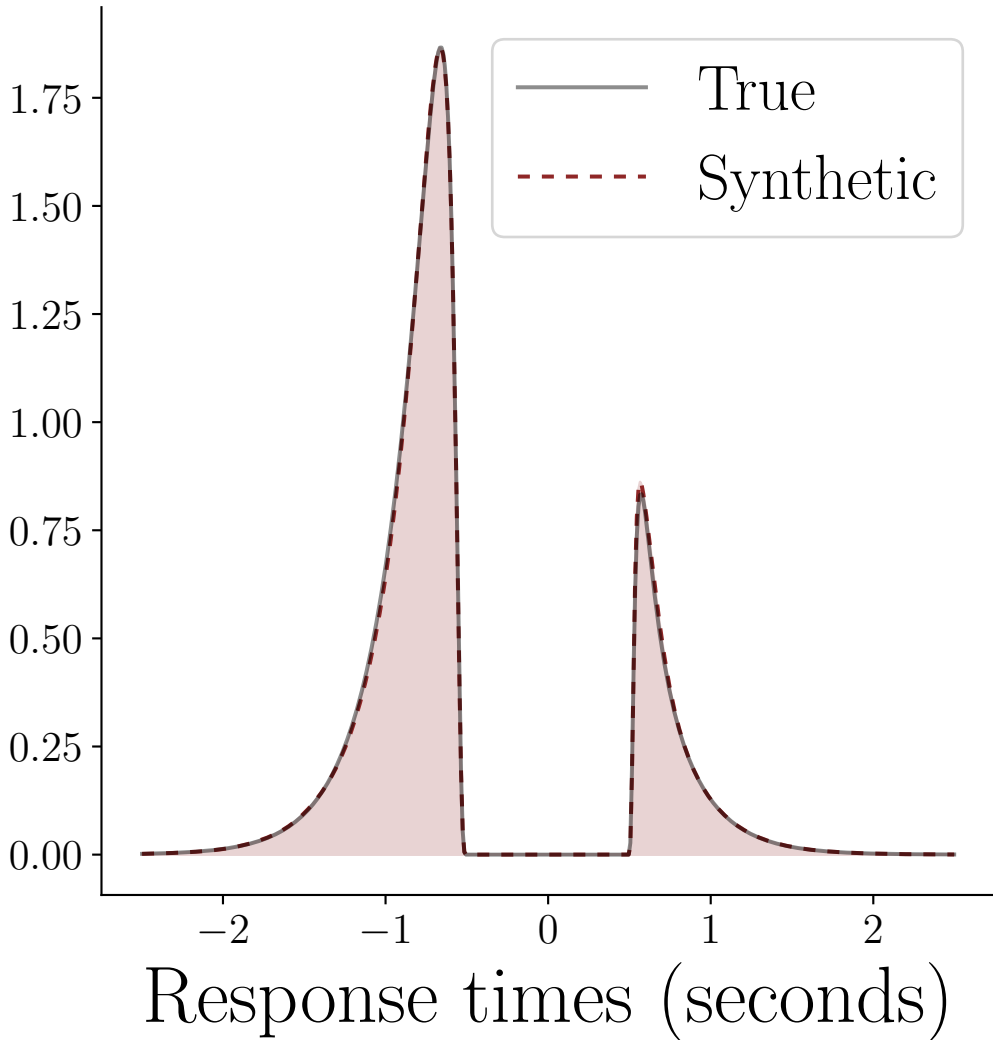

True

Synthetic

Supplement: supplementary_material [file attachment]

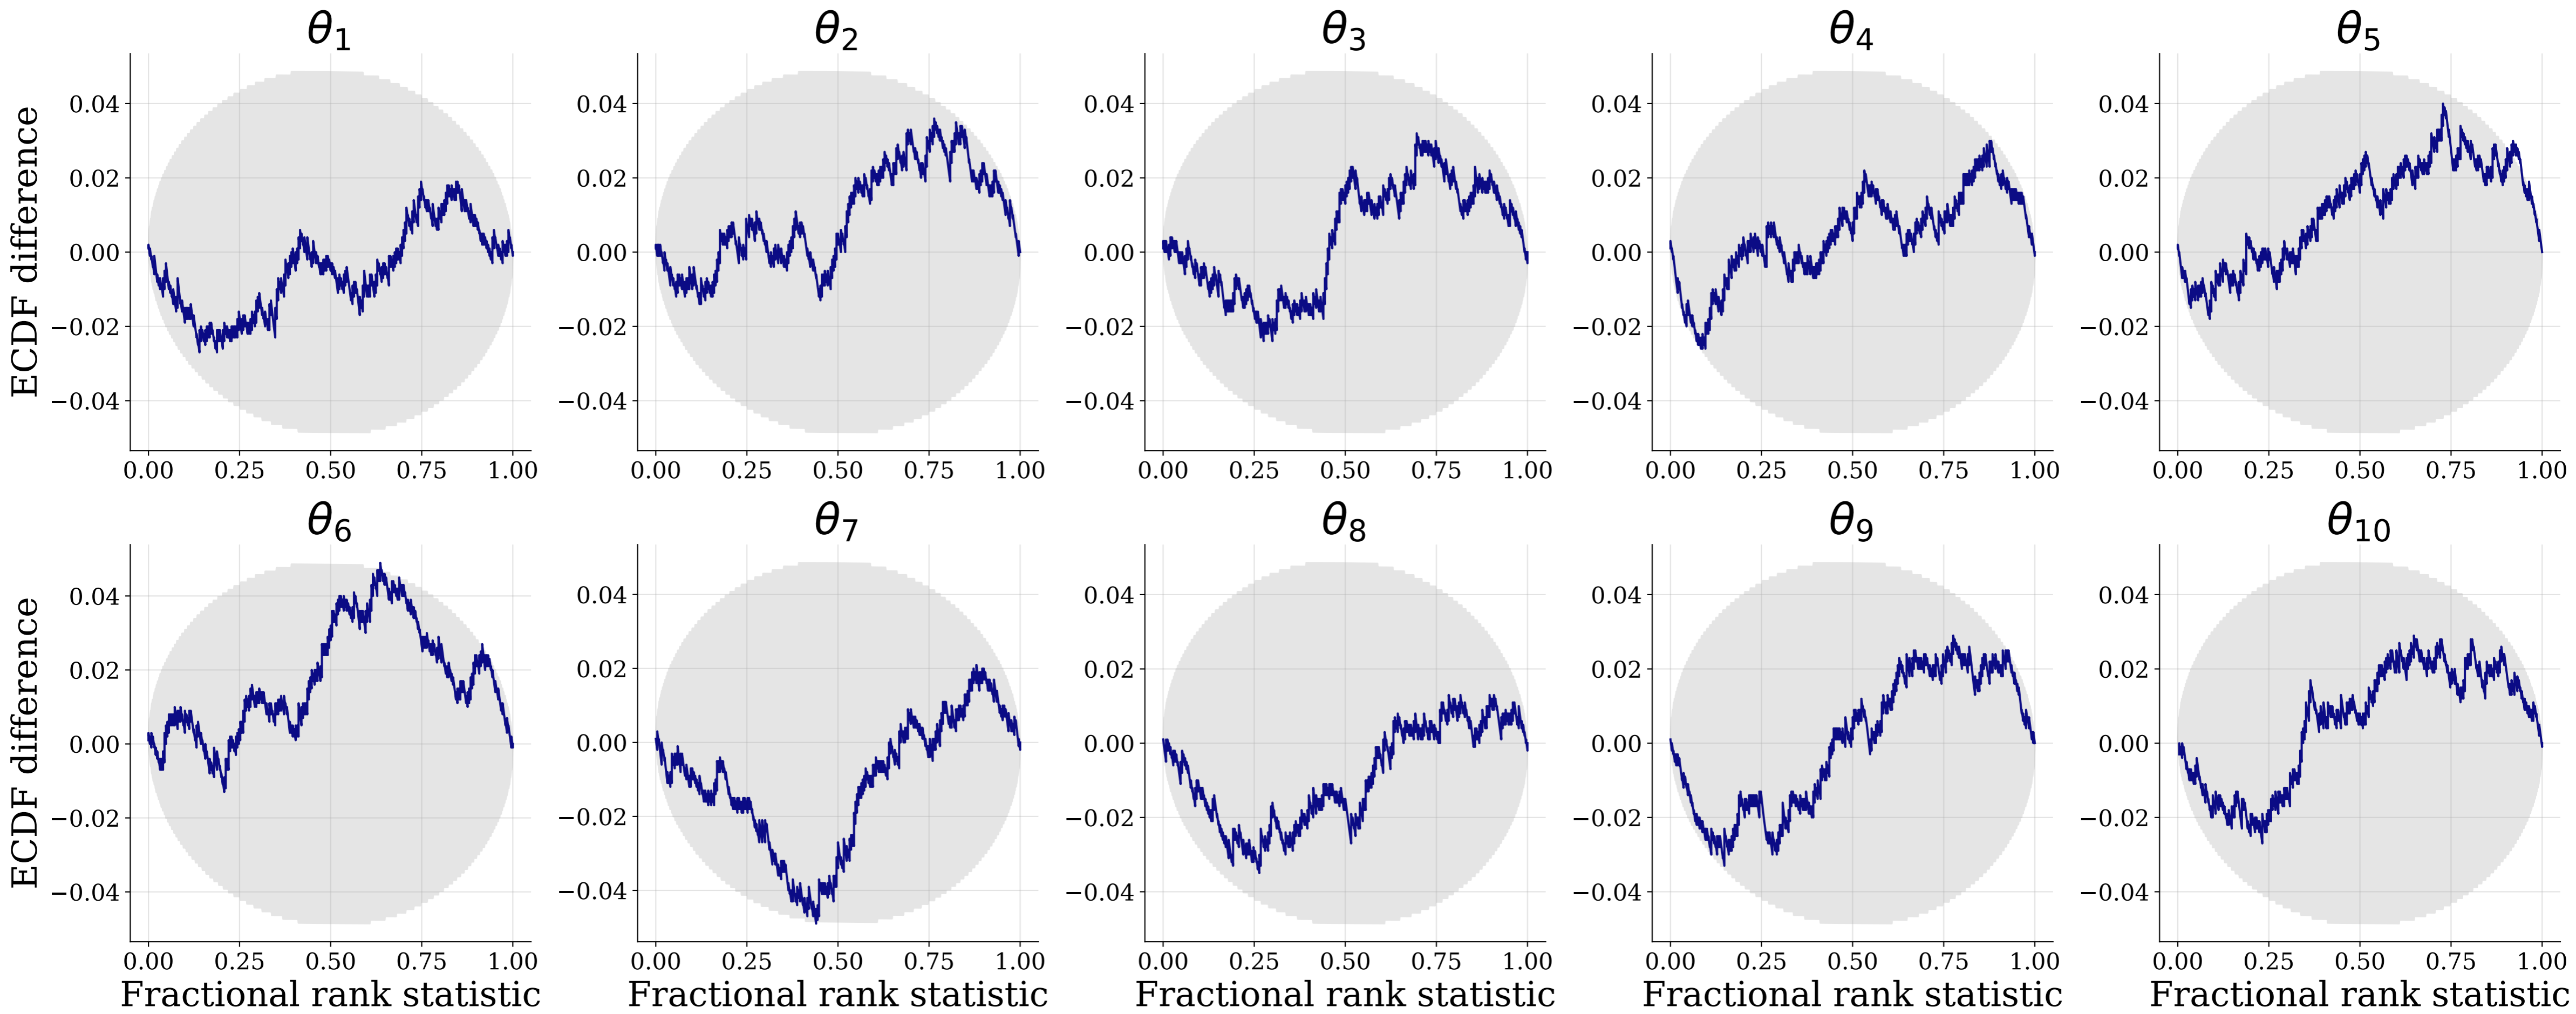

Supplement: supplementary_material [file attachment]

Post.Loss

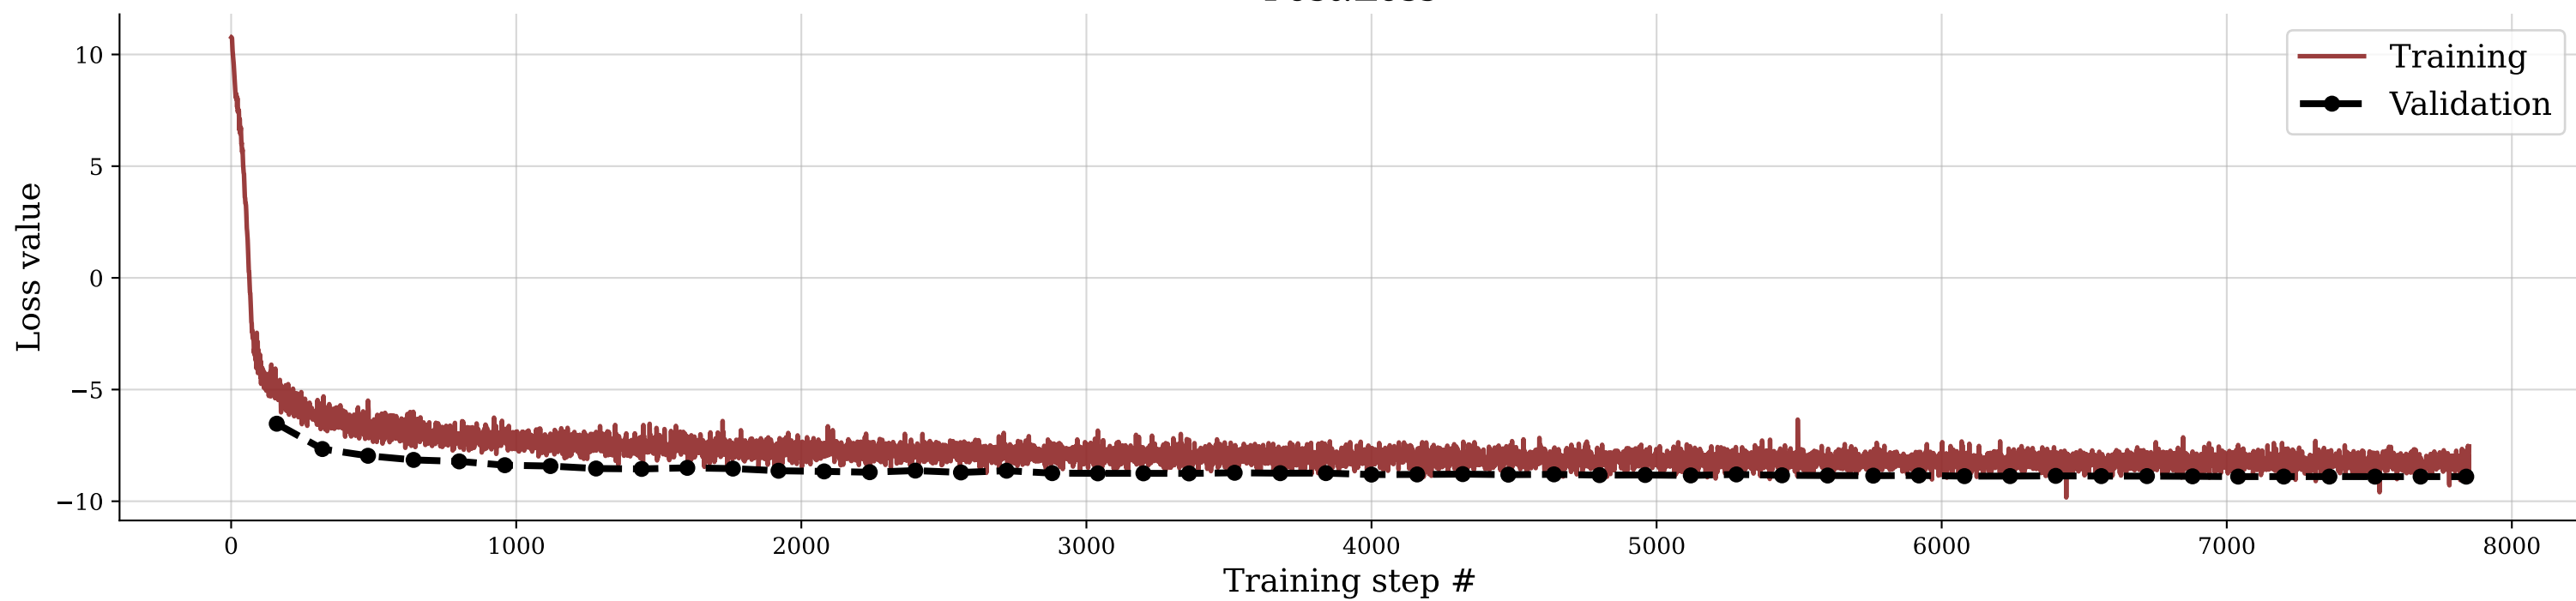

Lik.Loss

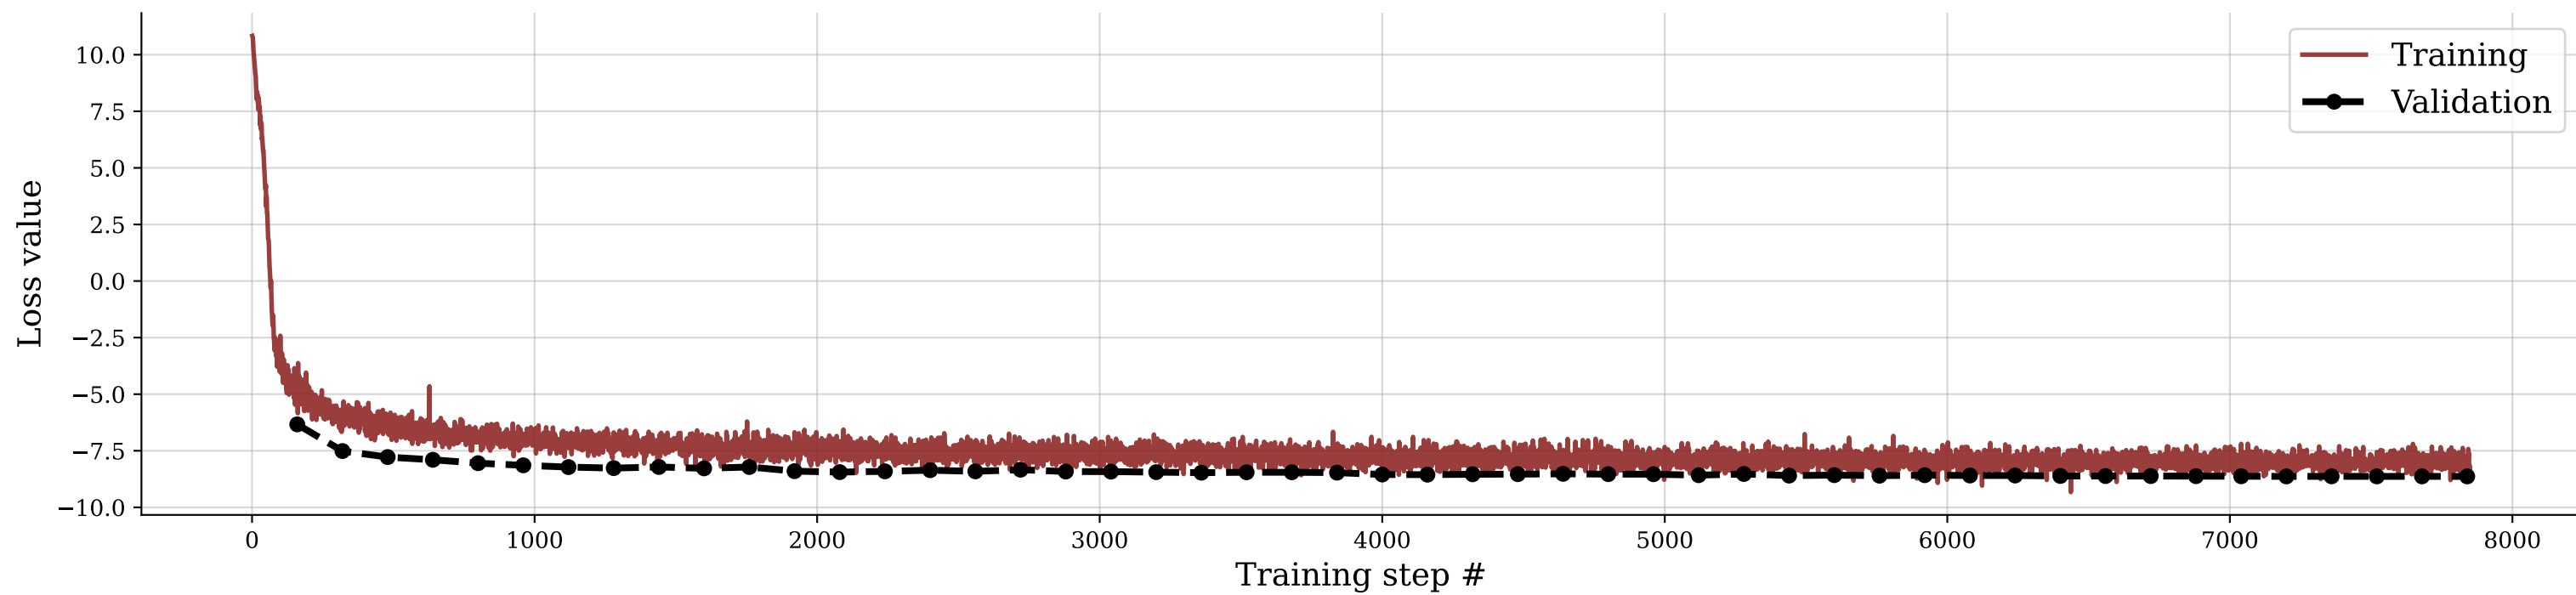

W.Decay

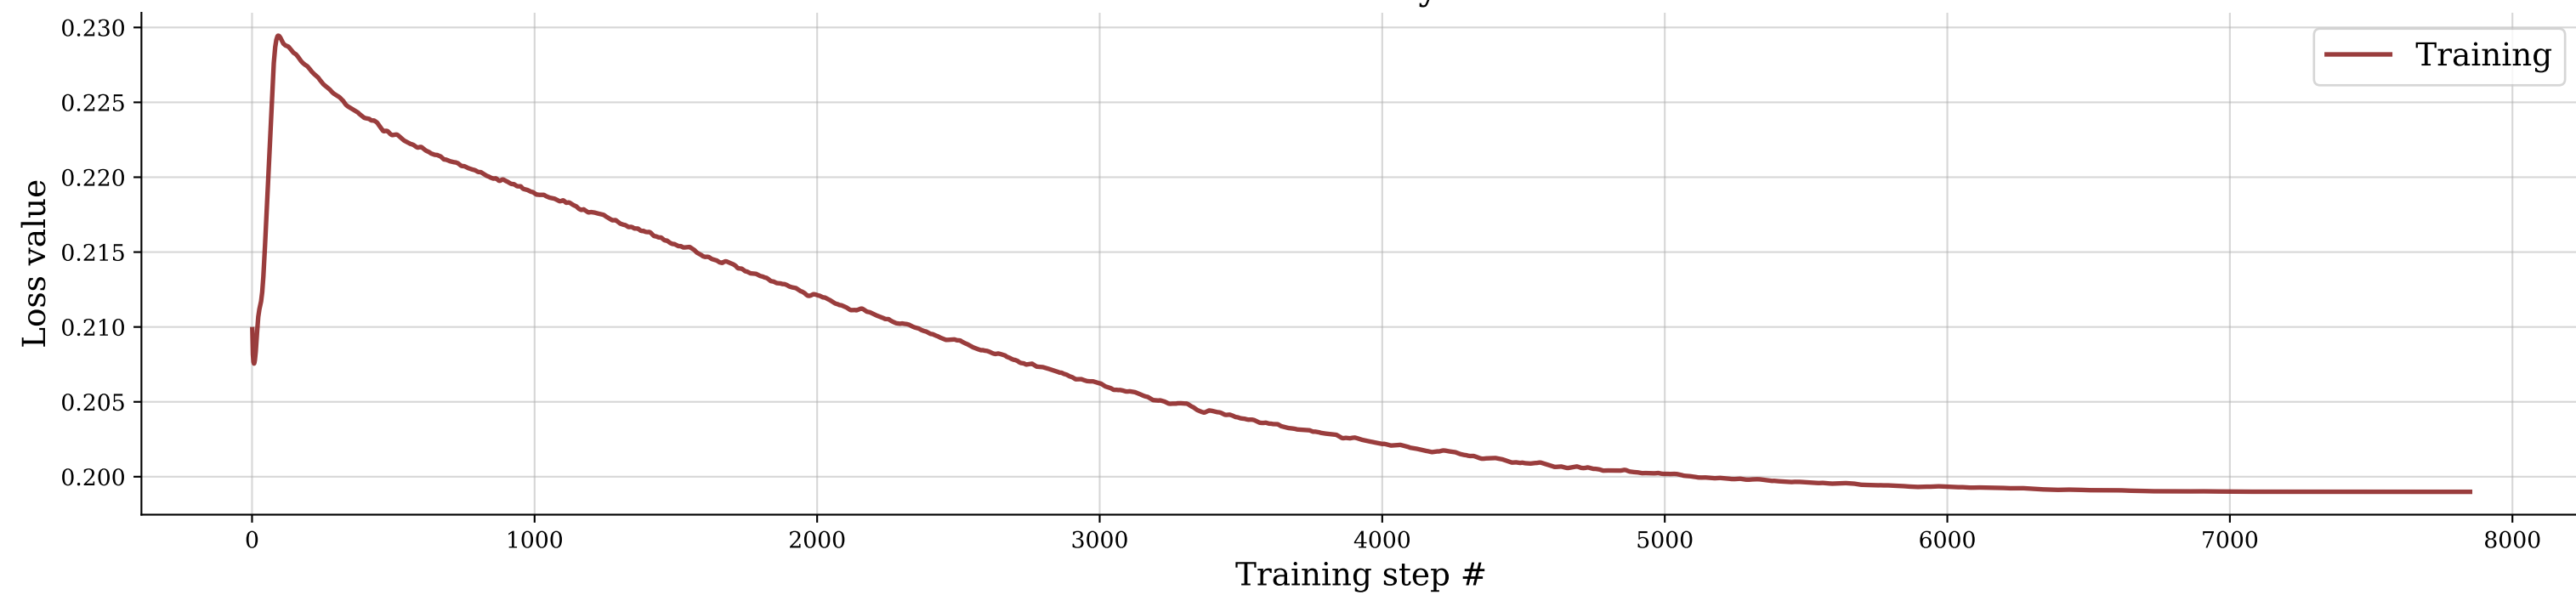

Supplement: supplementary_material [file attachment]

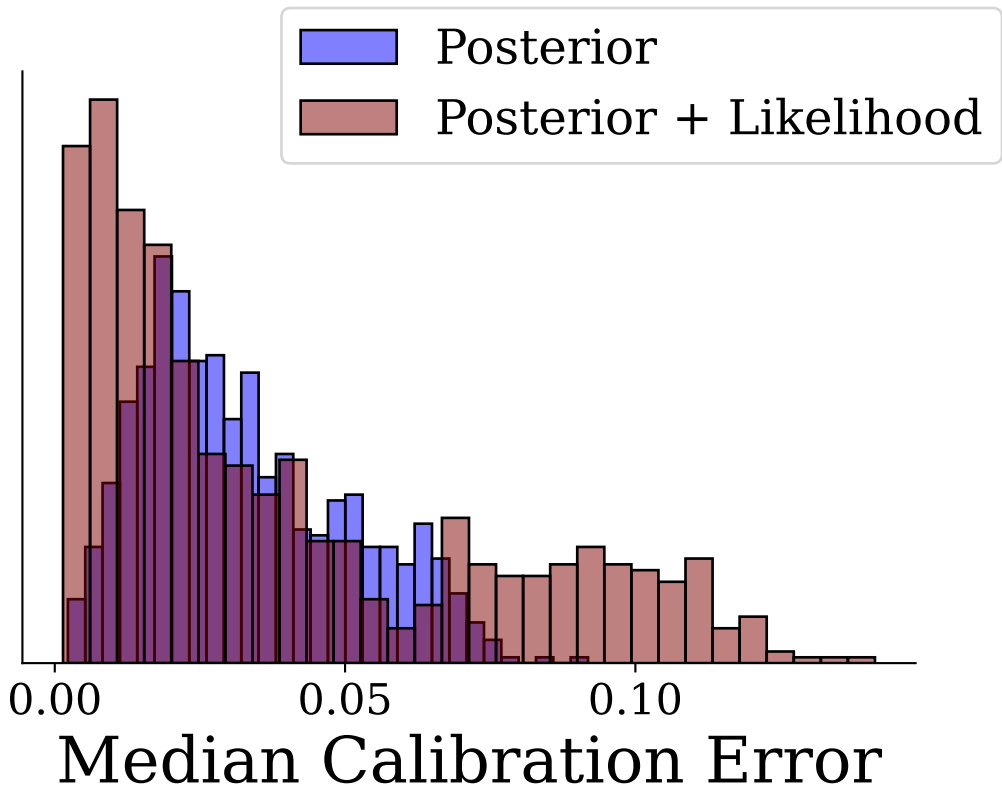

Supplement: supplementary_material [file attachment]

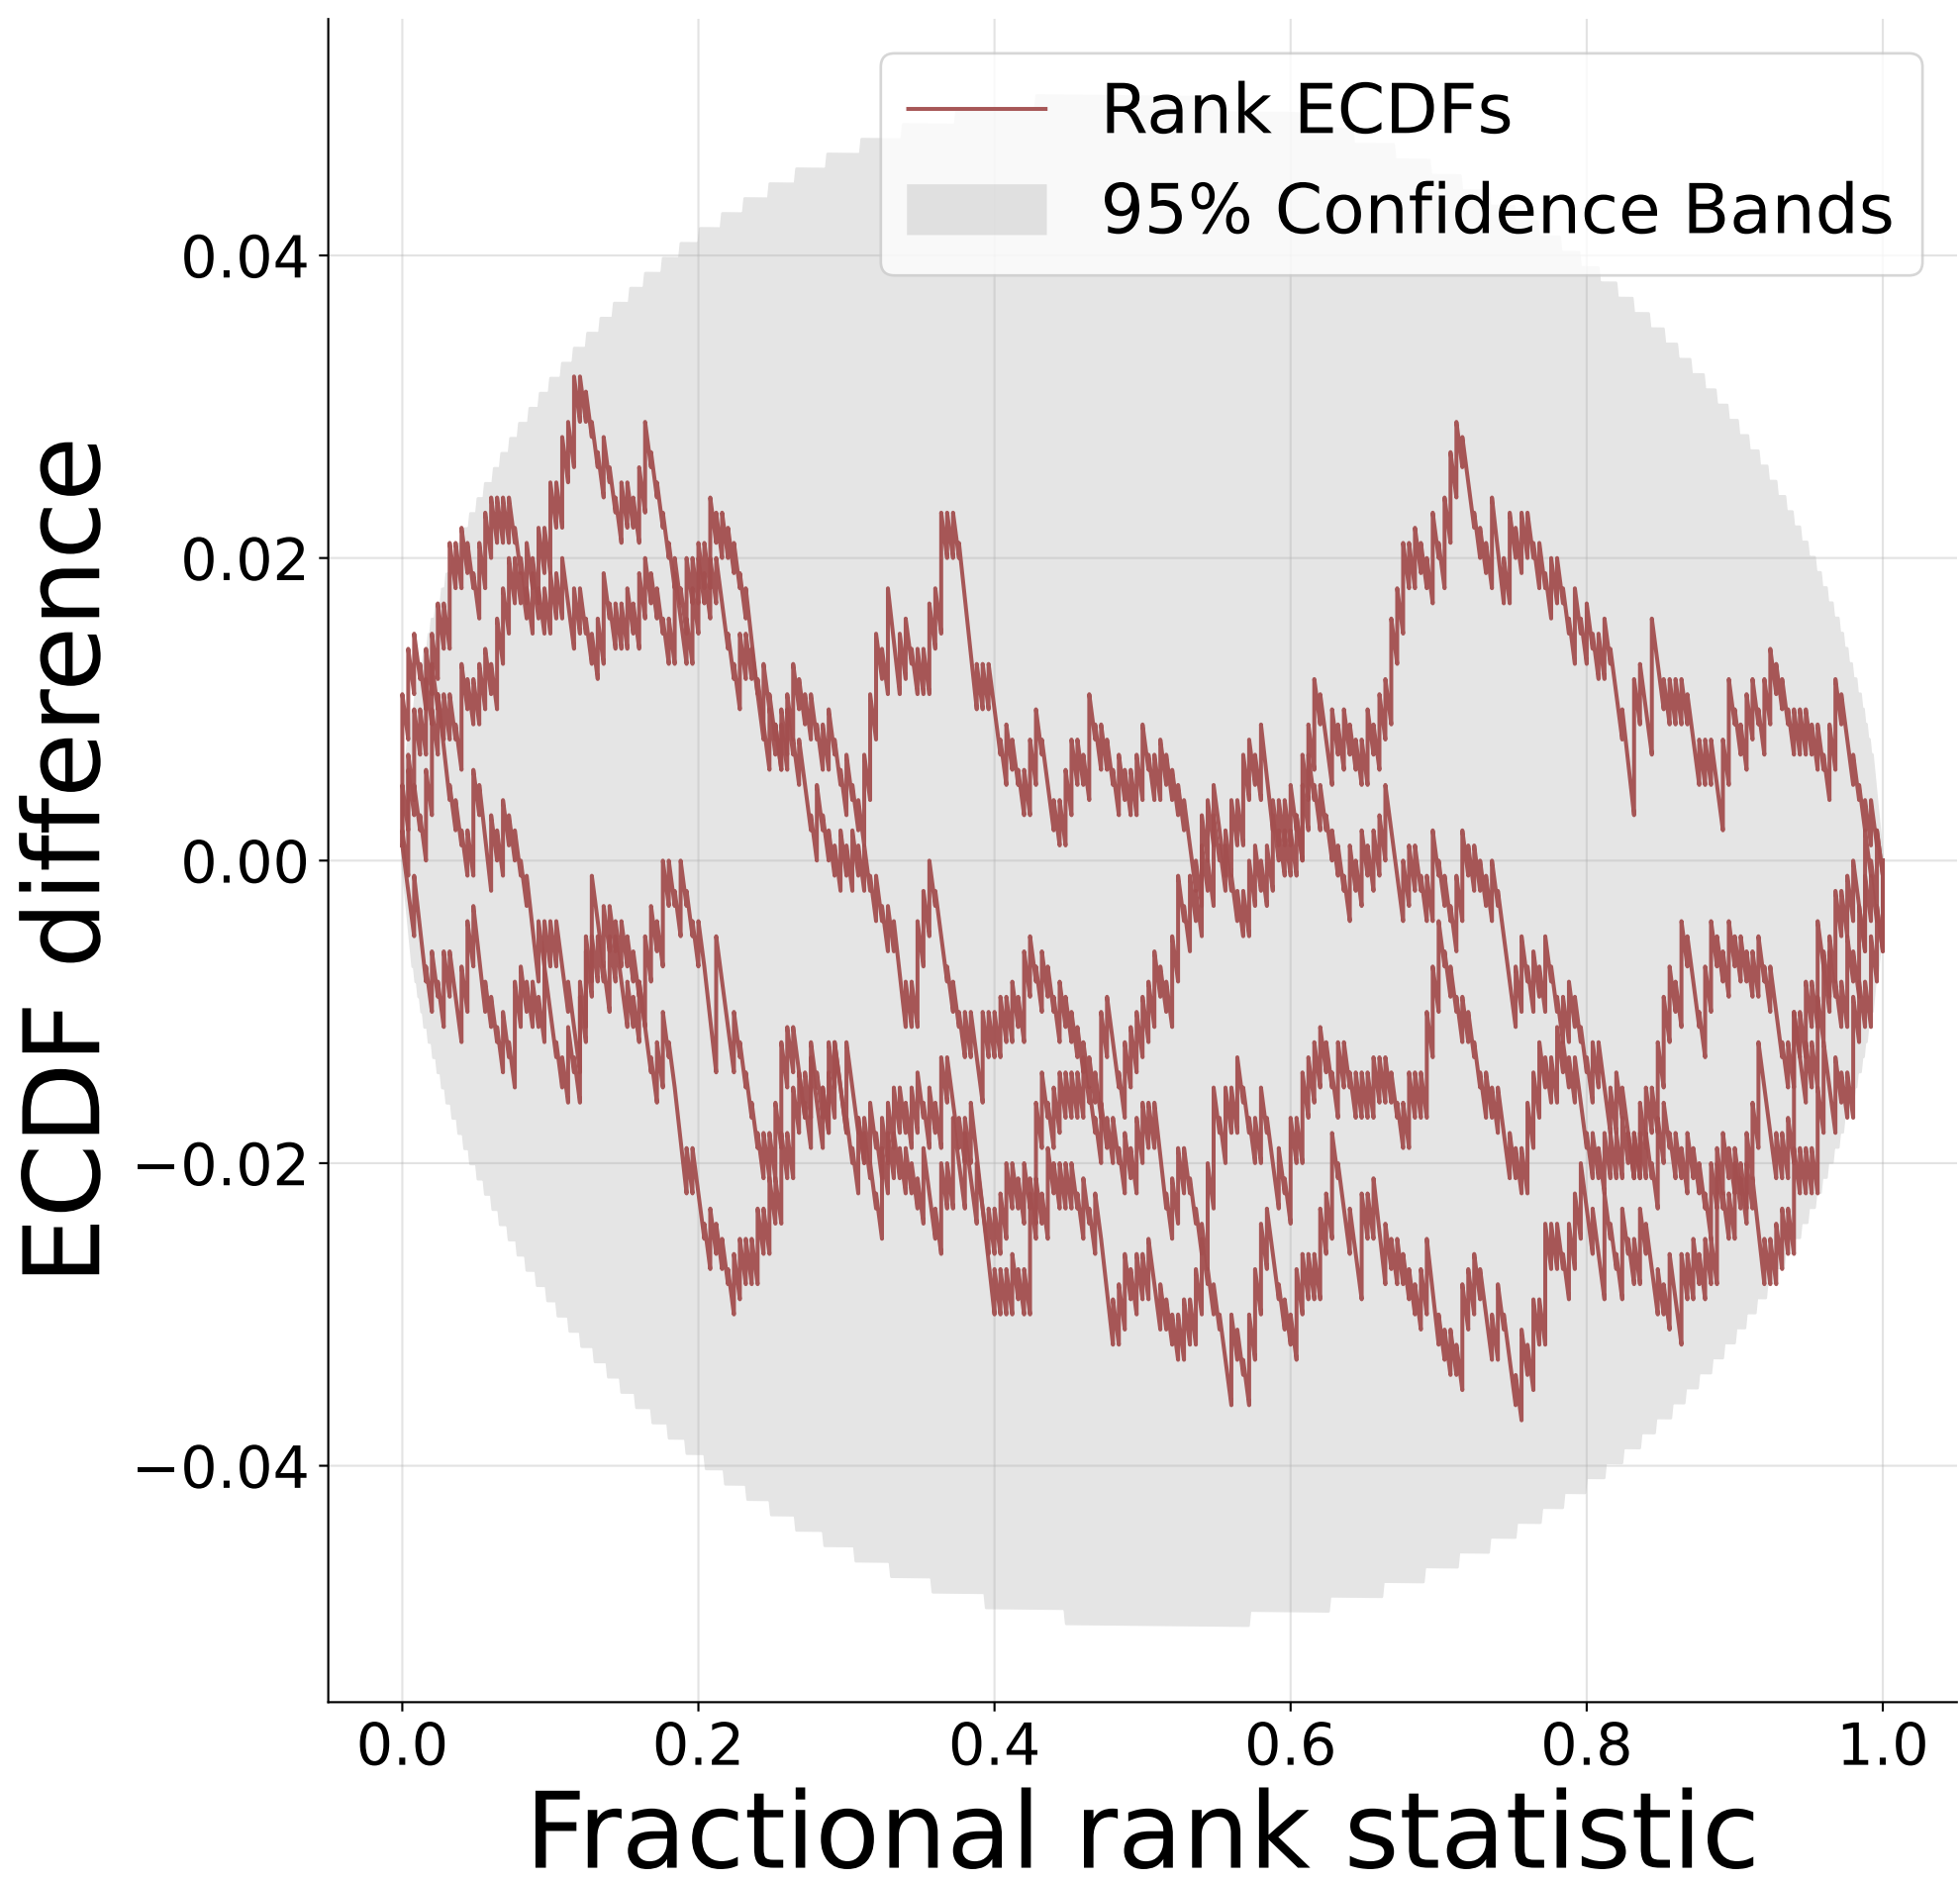

Supplement: supplementary_material [file attachment]

Surrogate

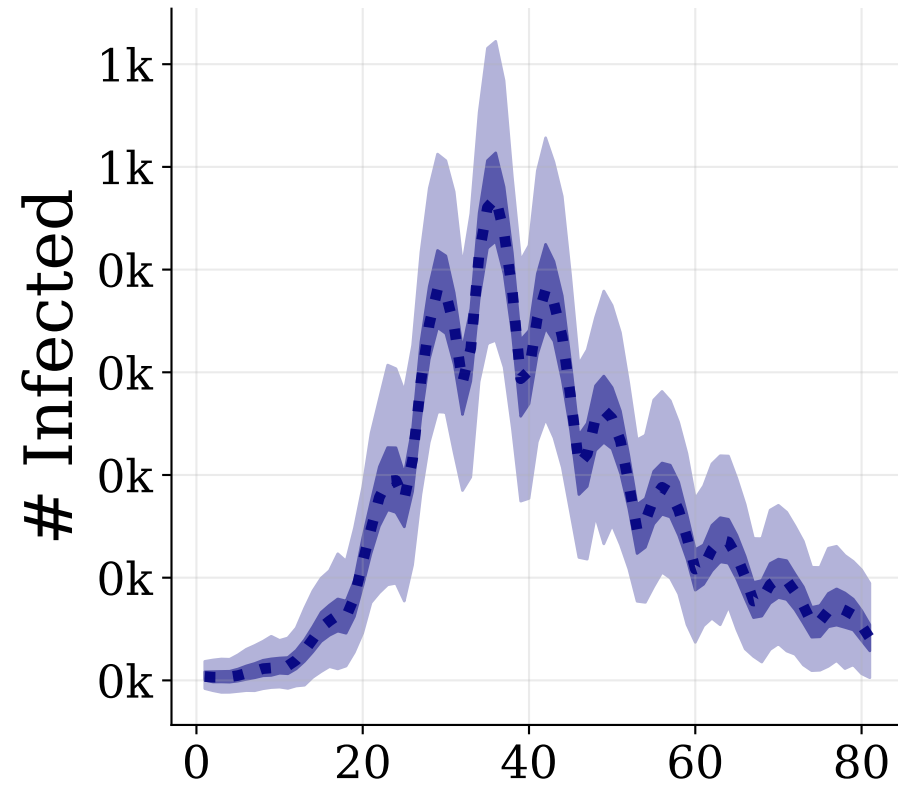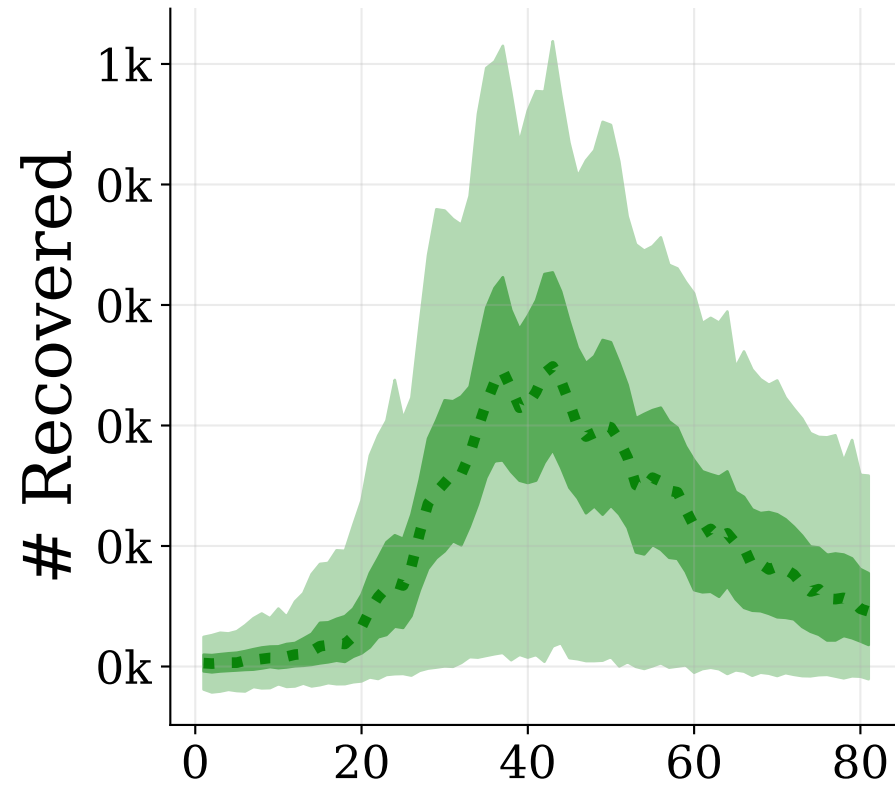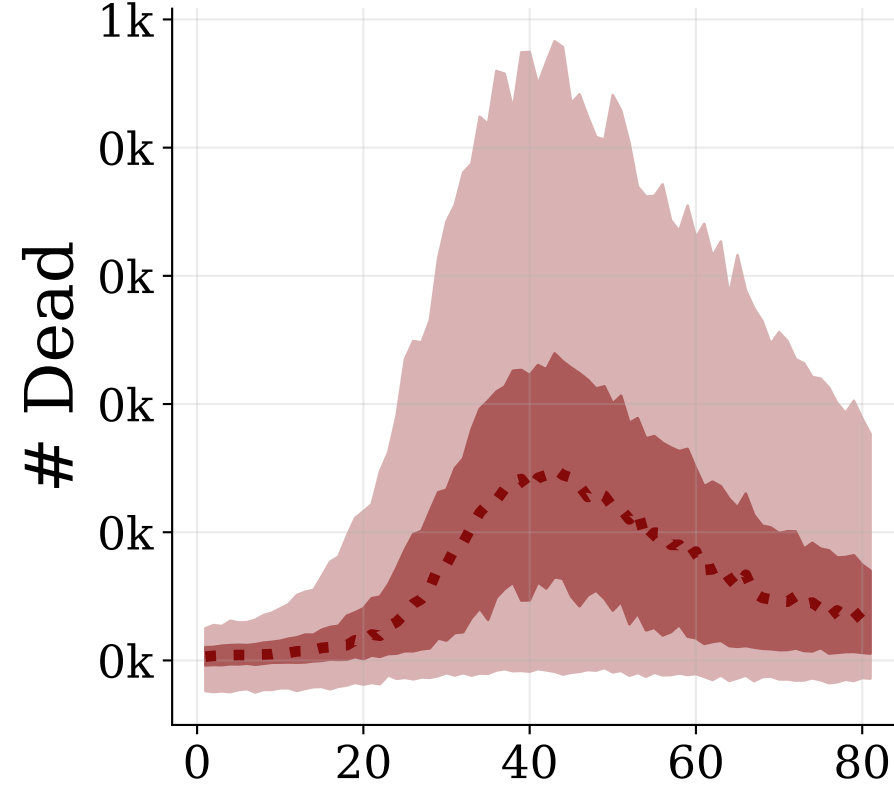

Simulator

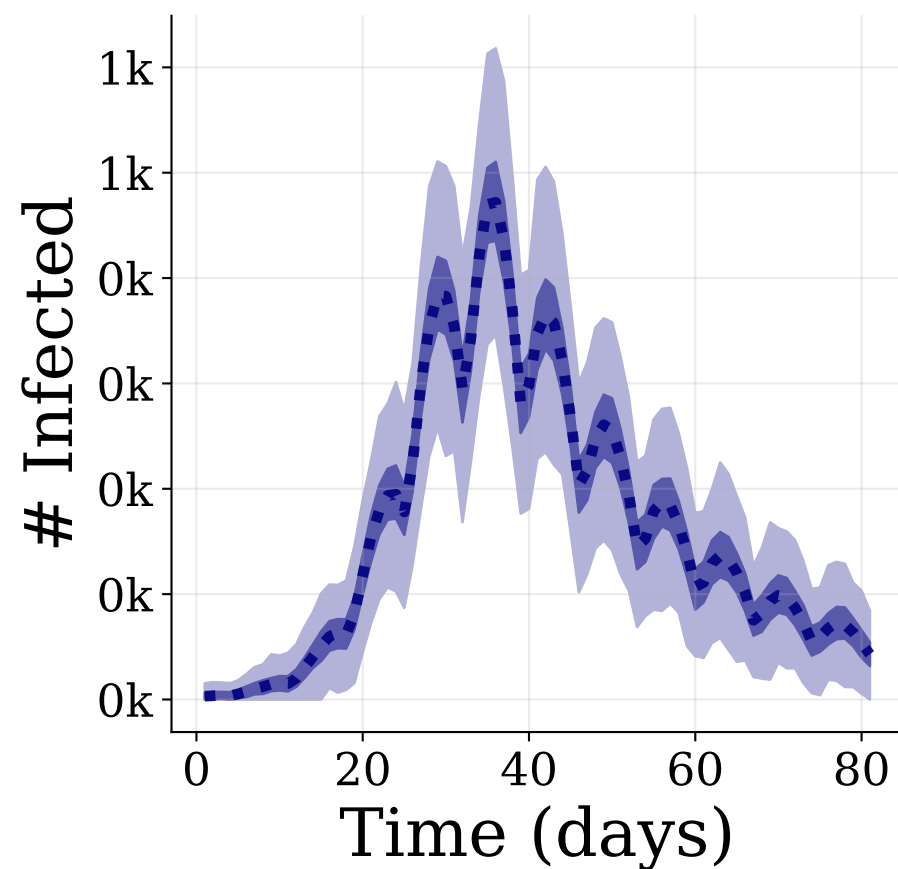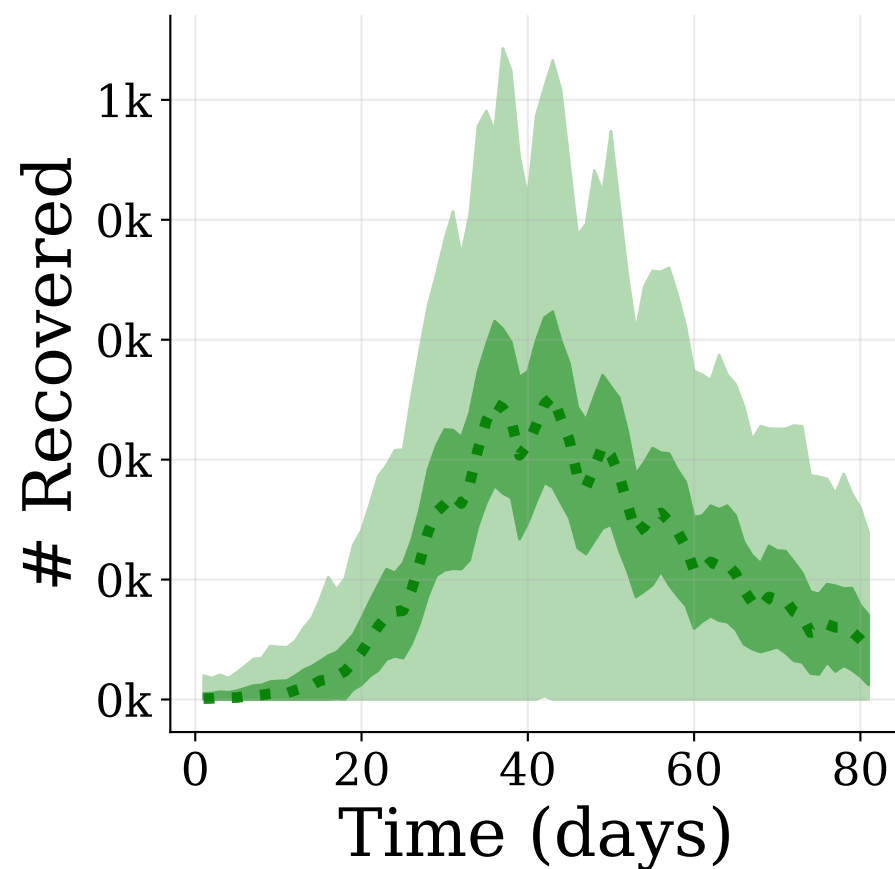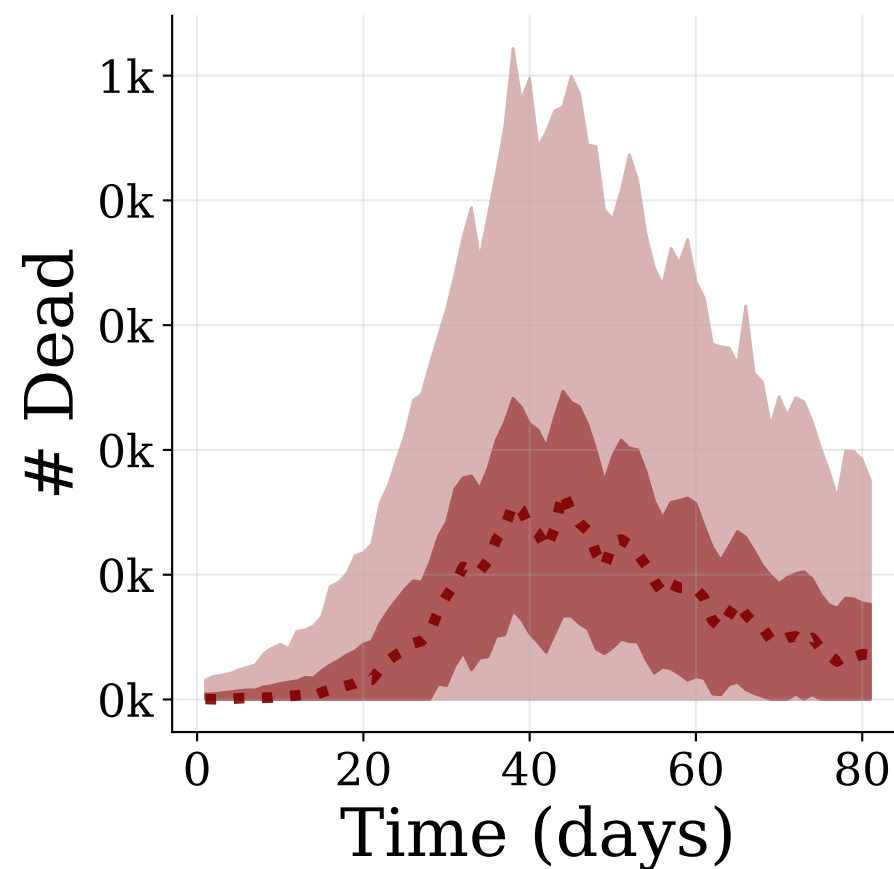

Supplement: supplementary_material [file attachment]

ECDF difference

$\beta$

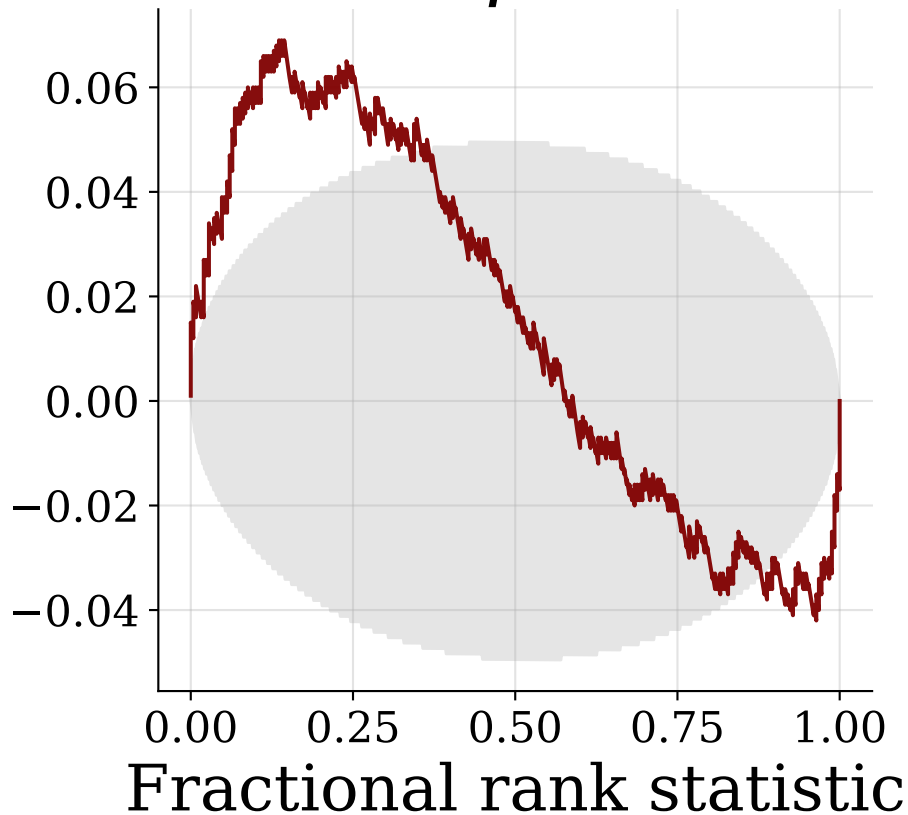

$\gamma$

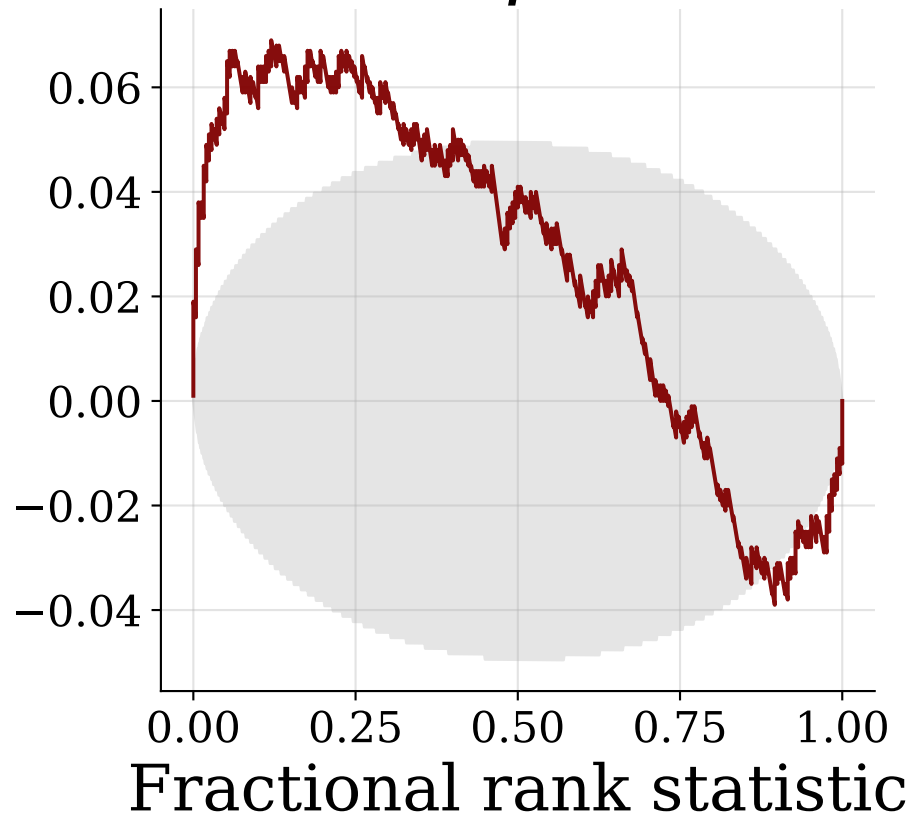

Supplement: supplementary_material [file attachment]

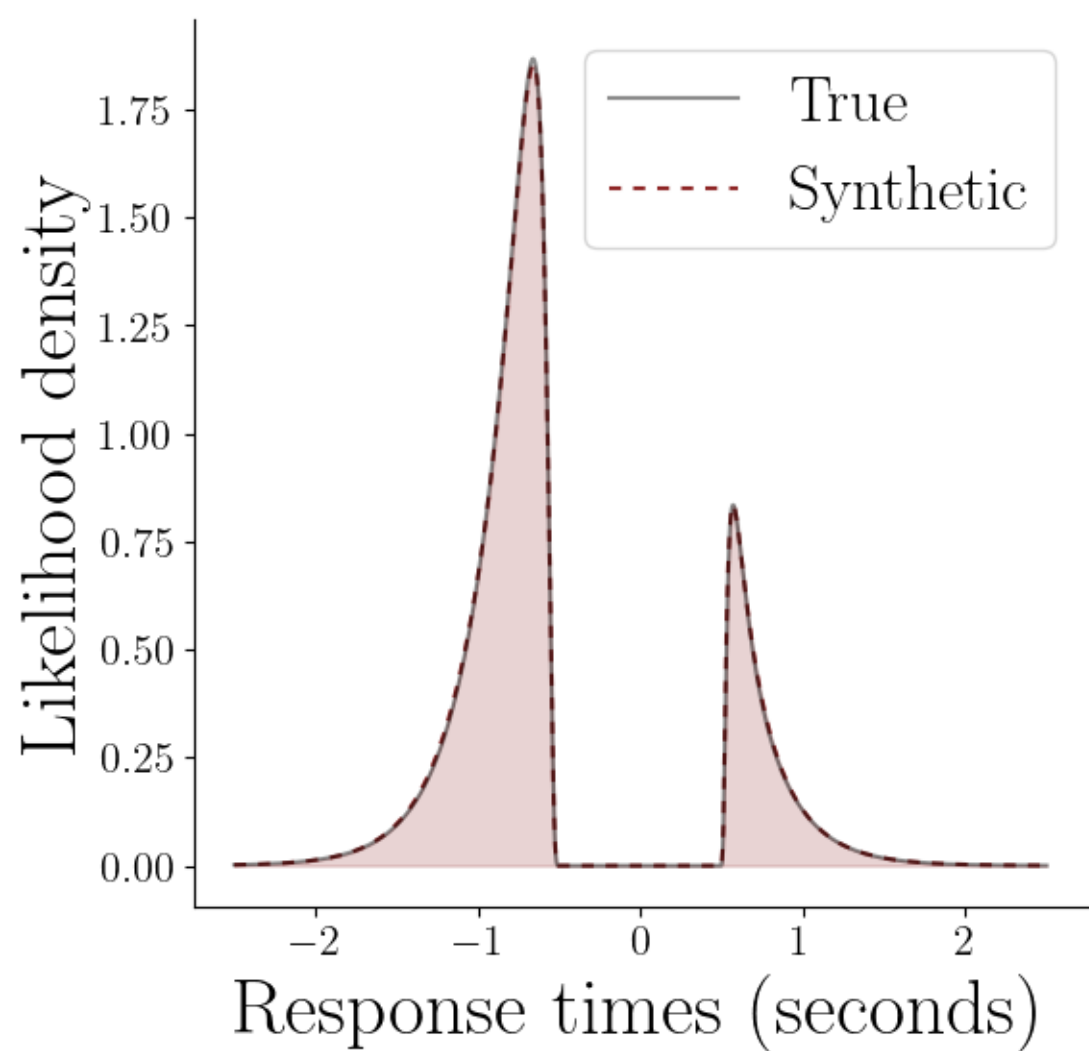

Supplement: supplementary_material [file attachment]

ECDF difference

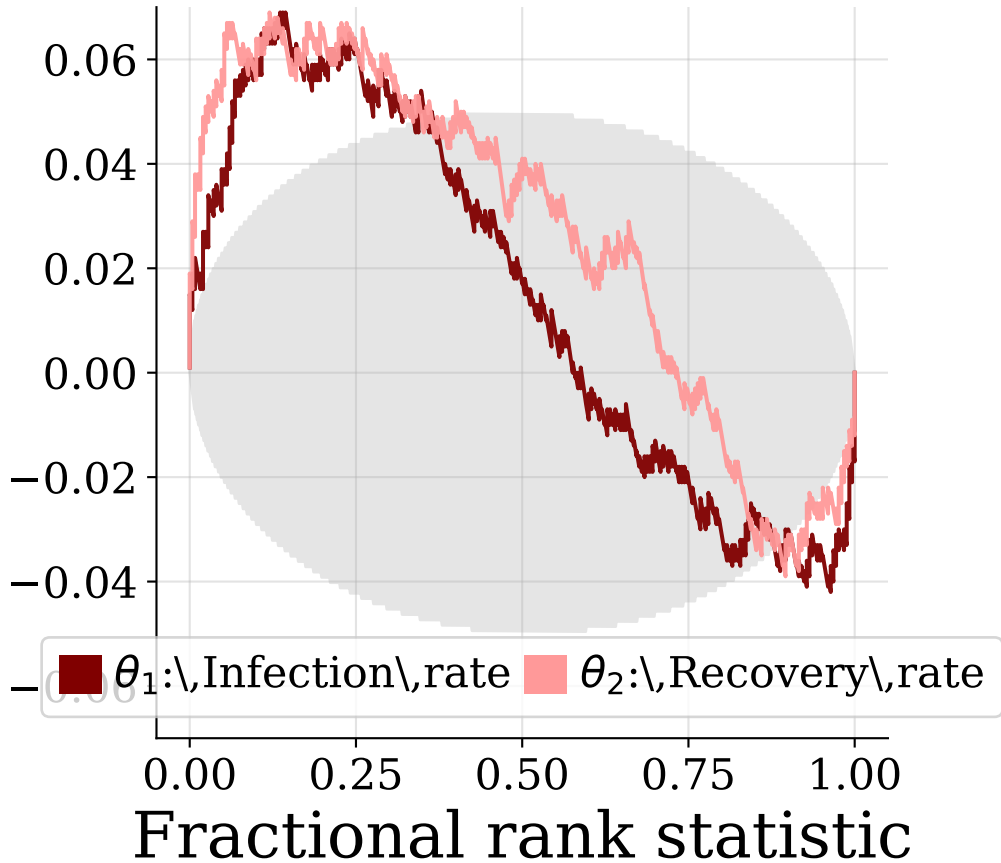

Supplement: supplementary_material [file attachment]

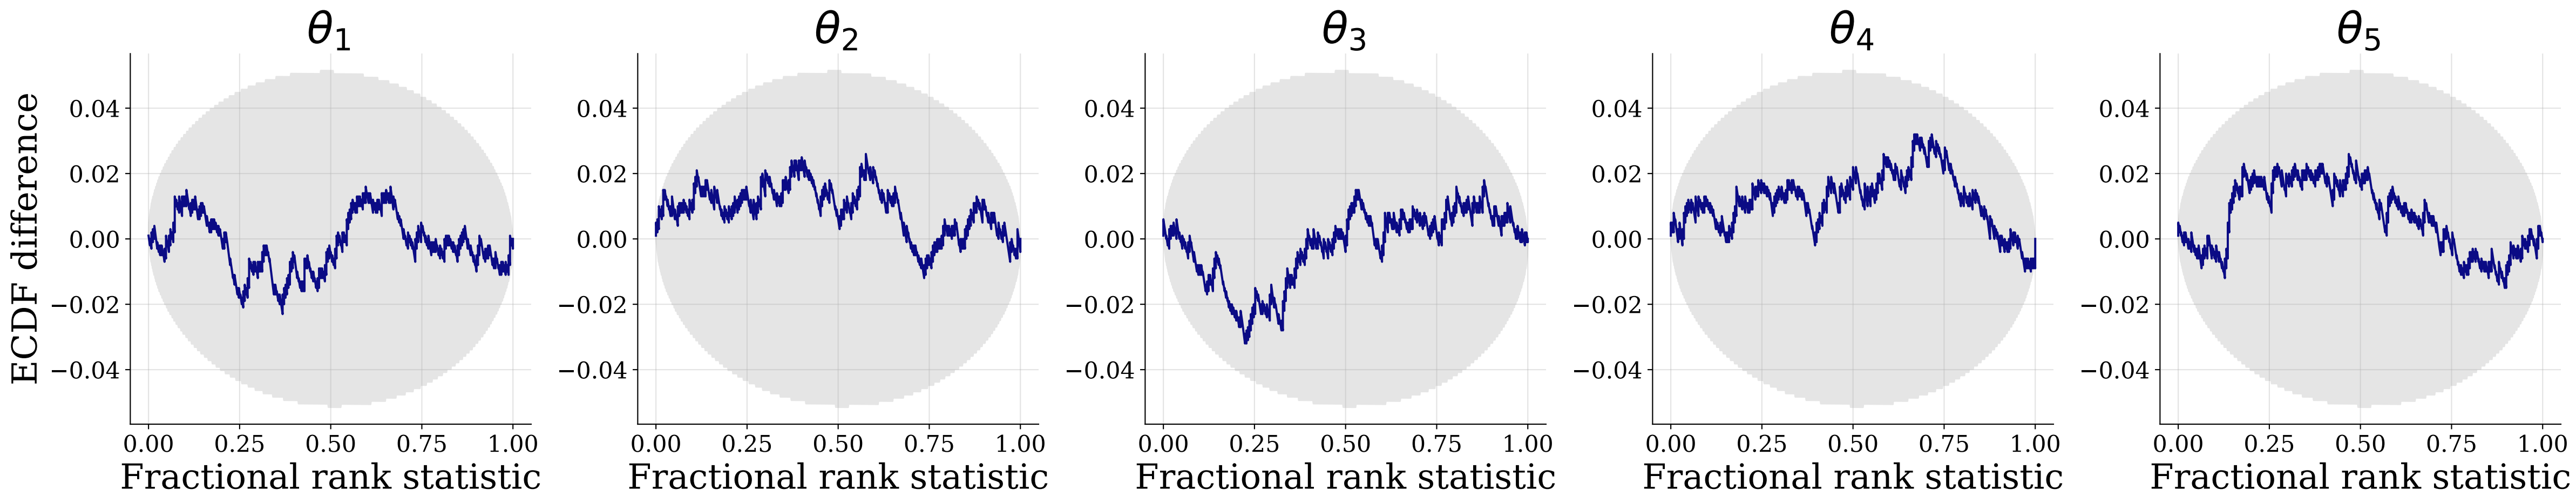

Supplement: supplementary_material [file attachment]

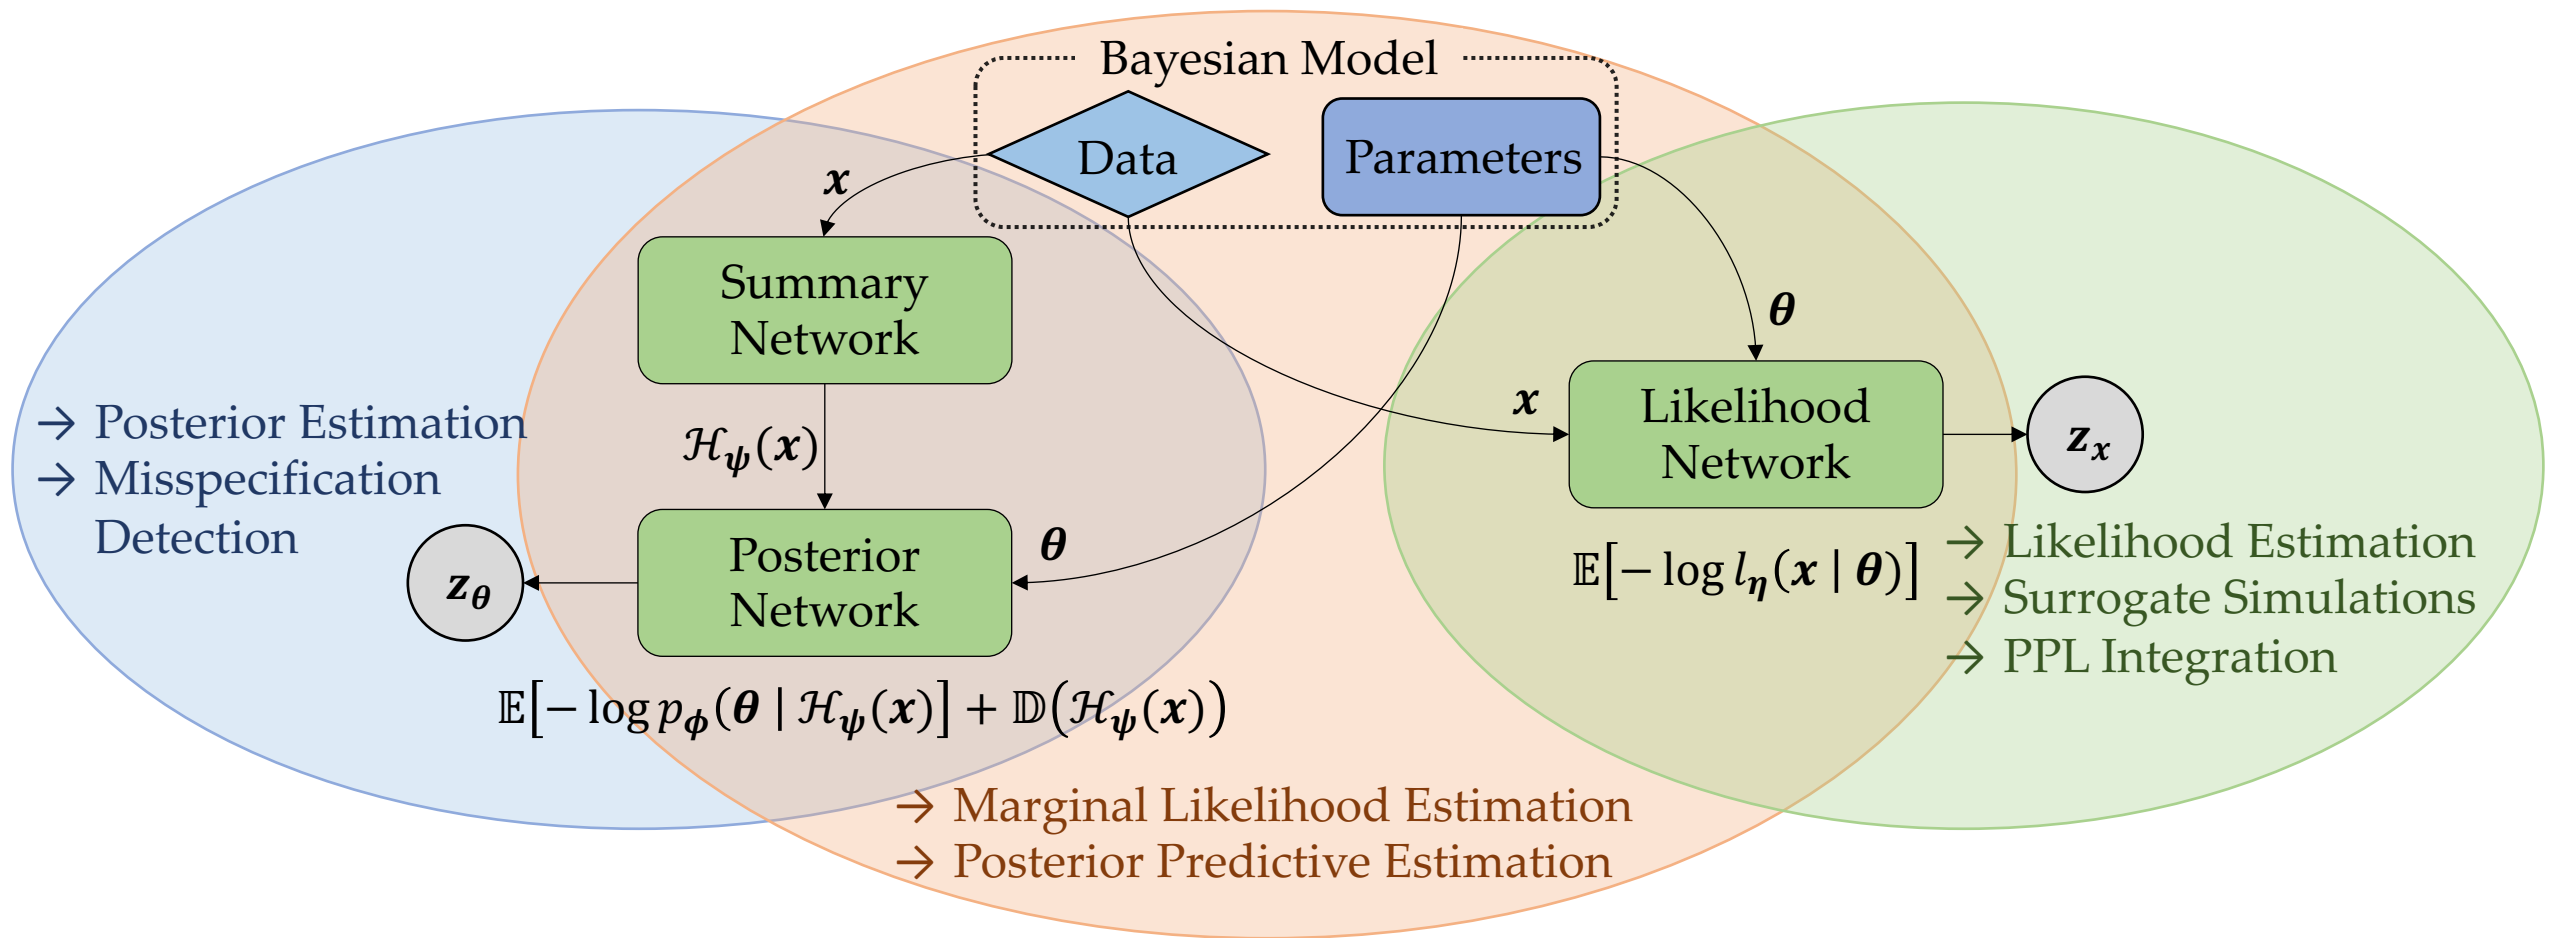

Supplement: supplementary_material [file attachment]

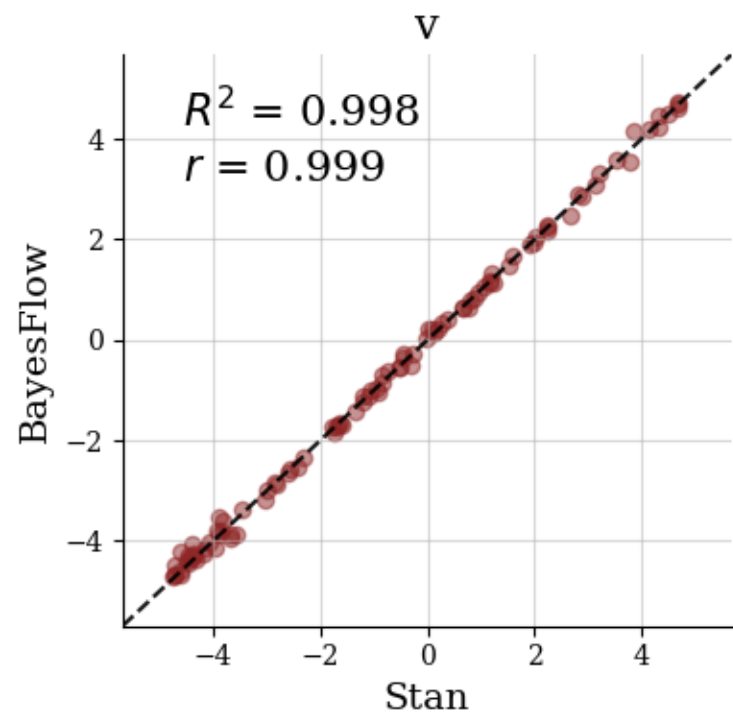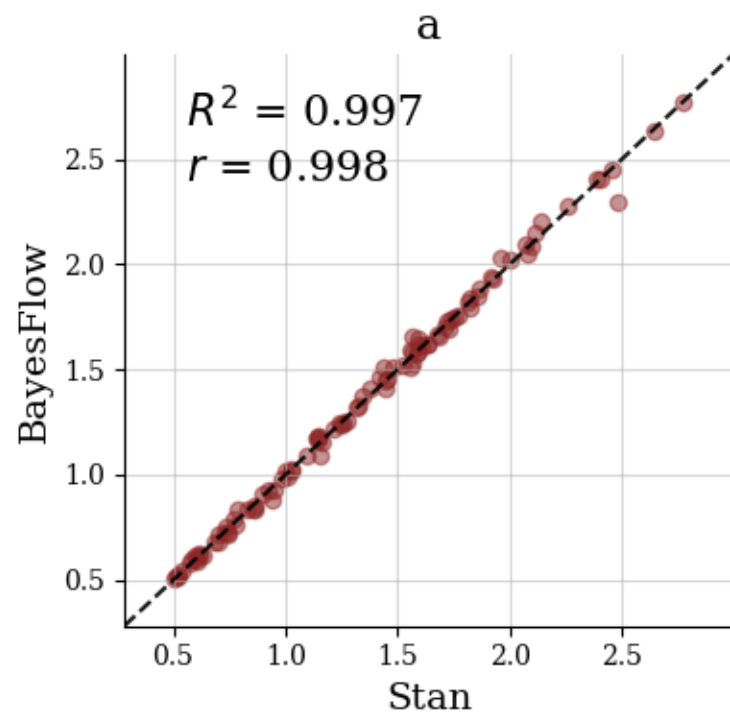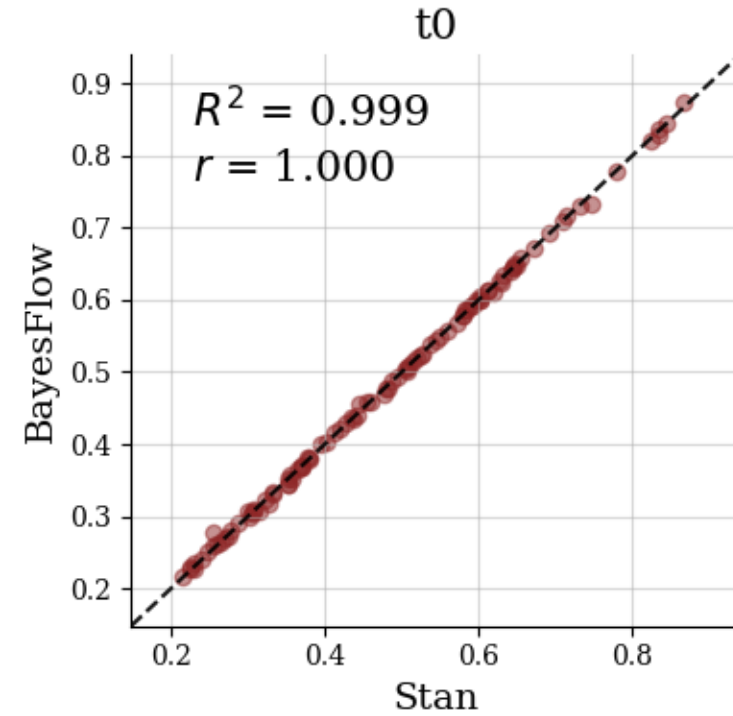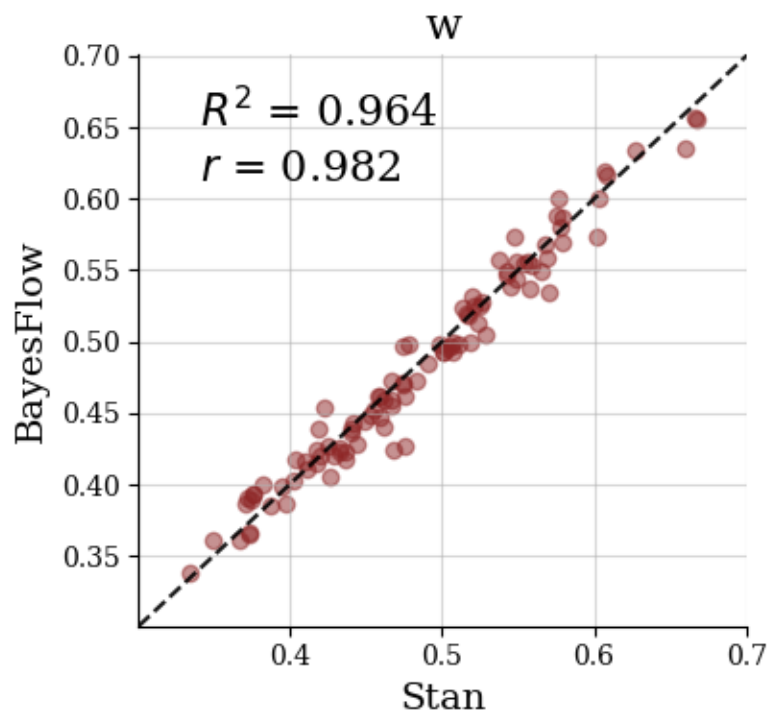

Supplement: supplementary_material [file attachment]

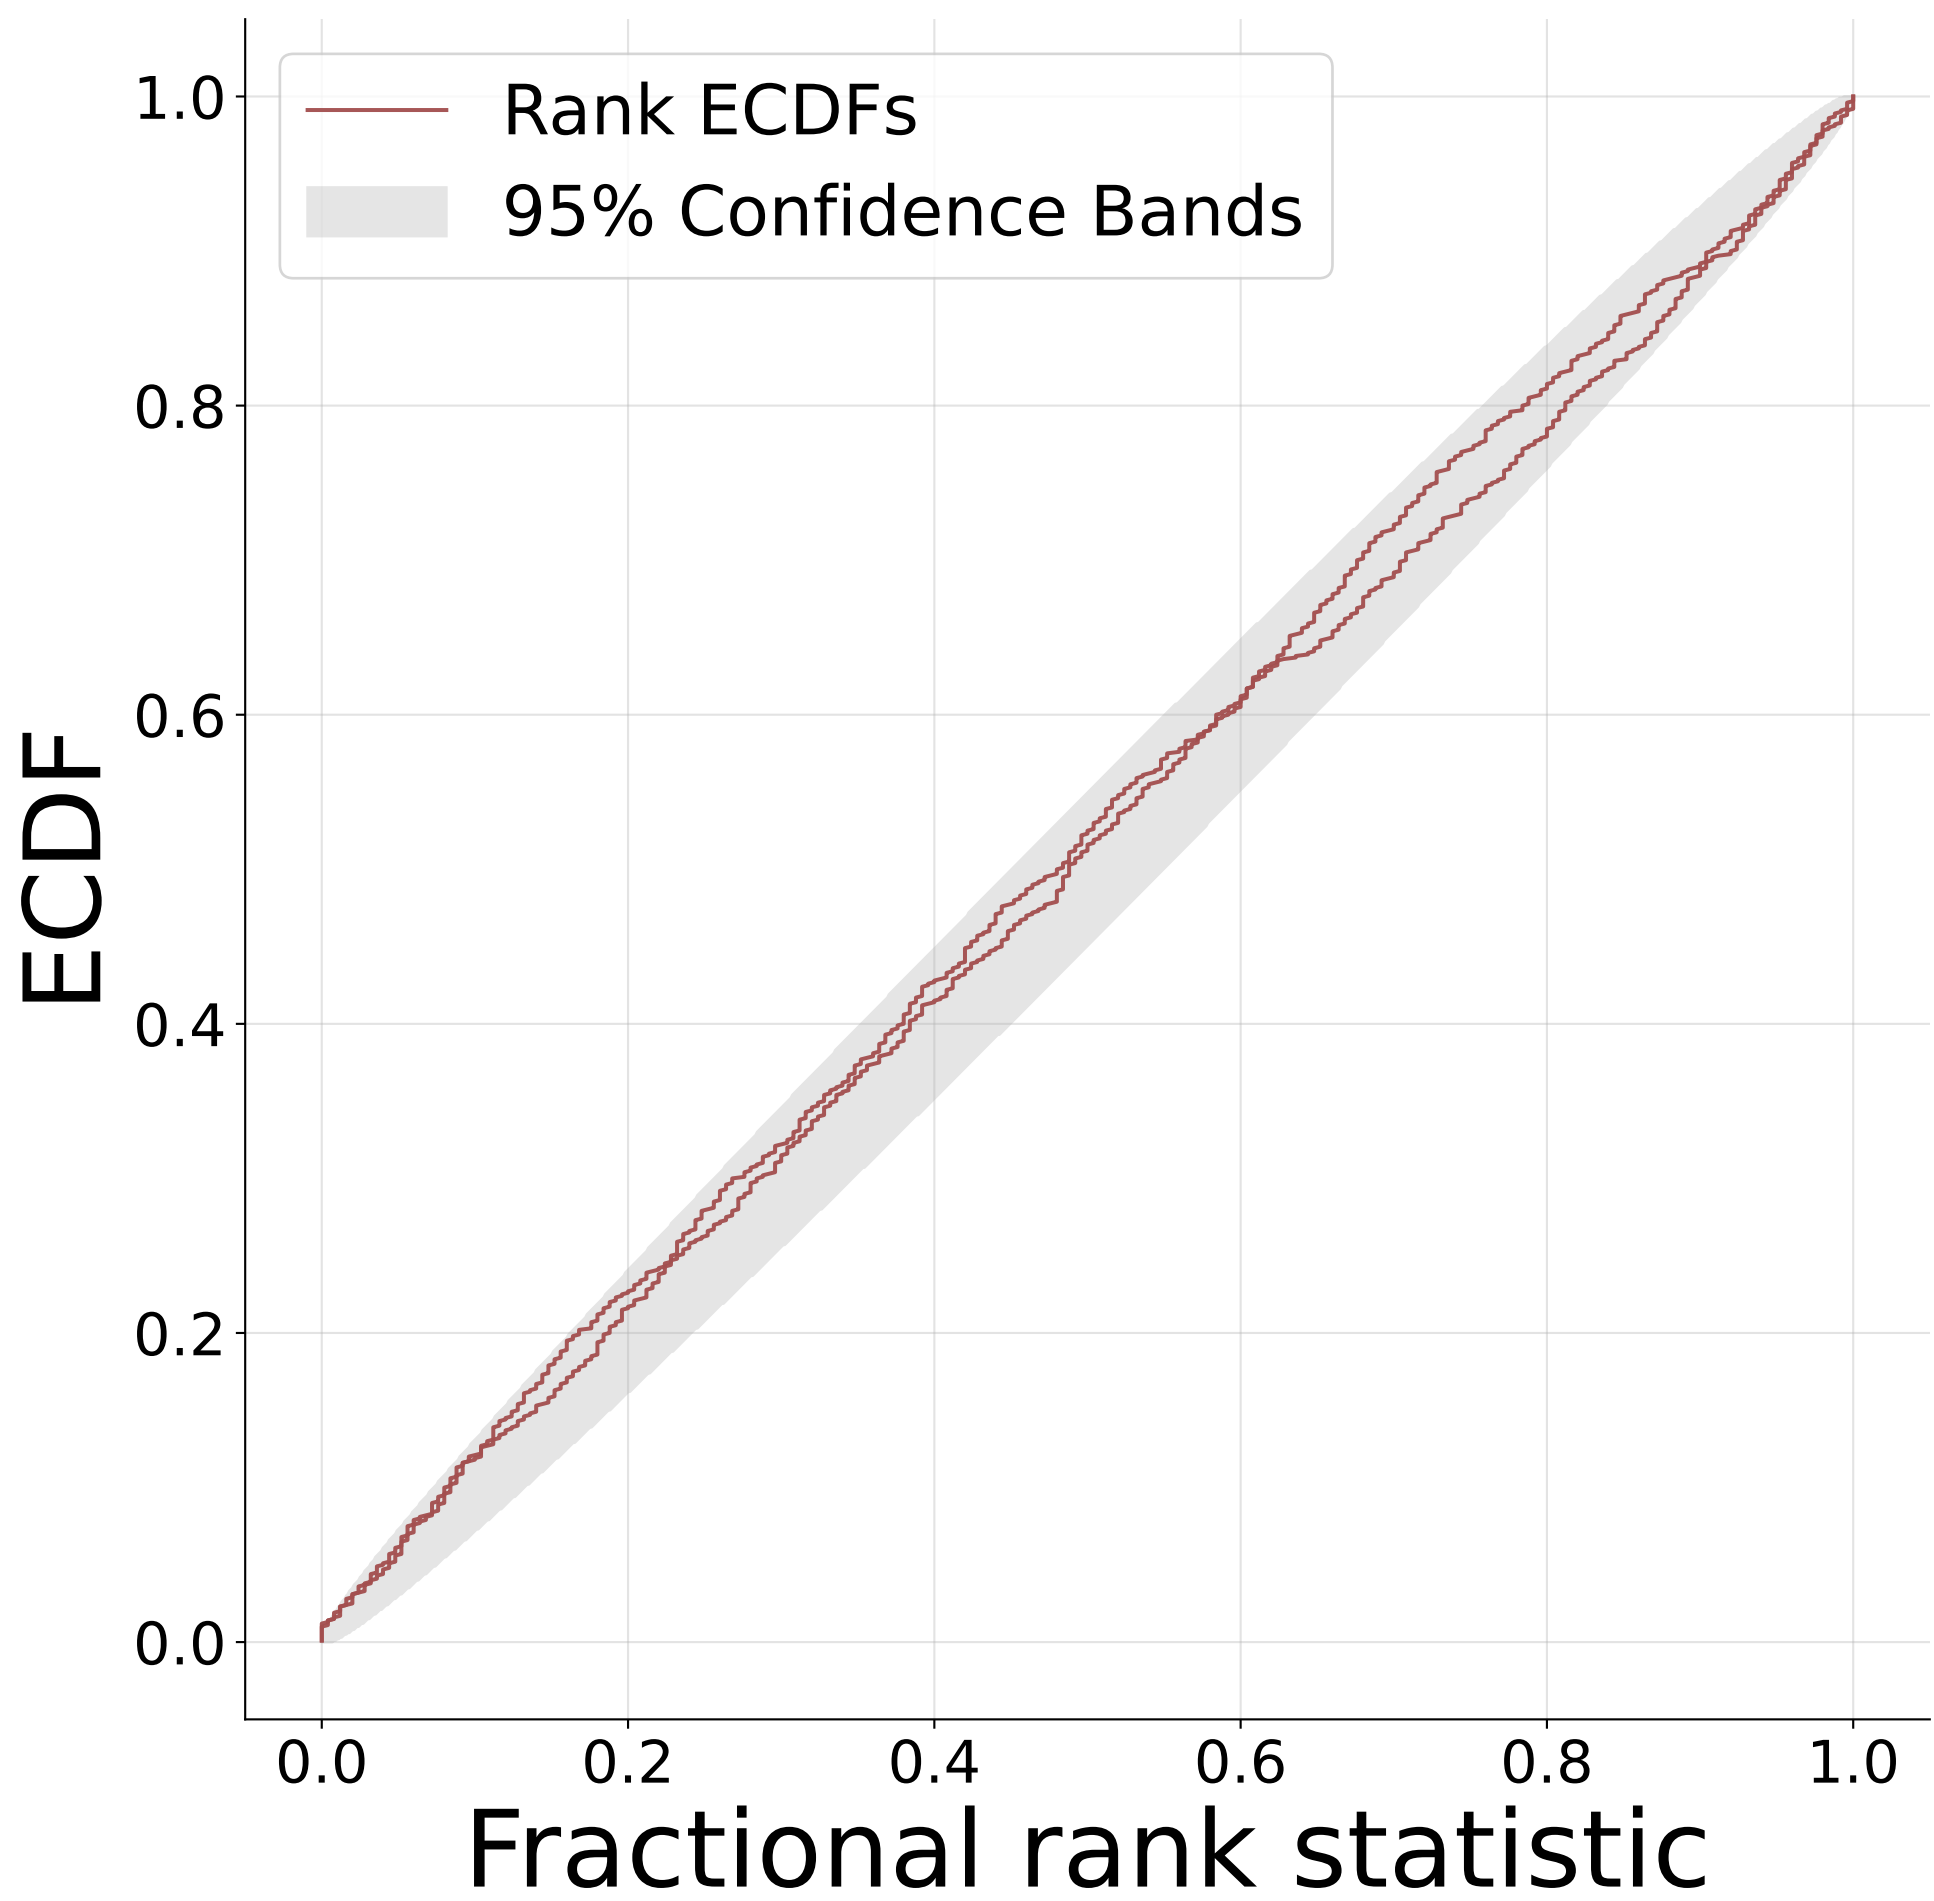

Supplement: supplementary_material [file attachment]

Post.Loss

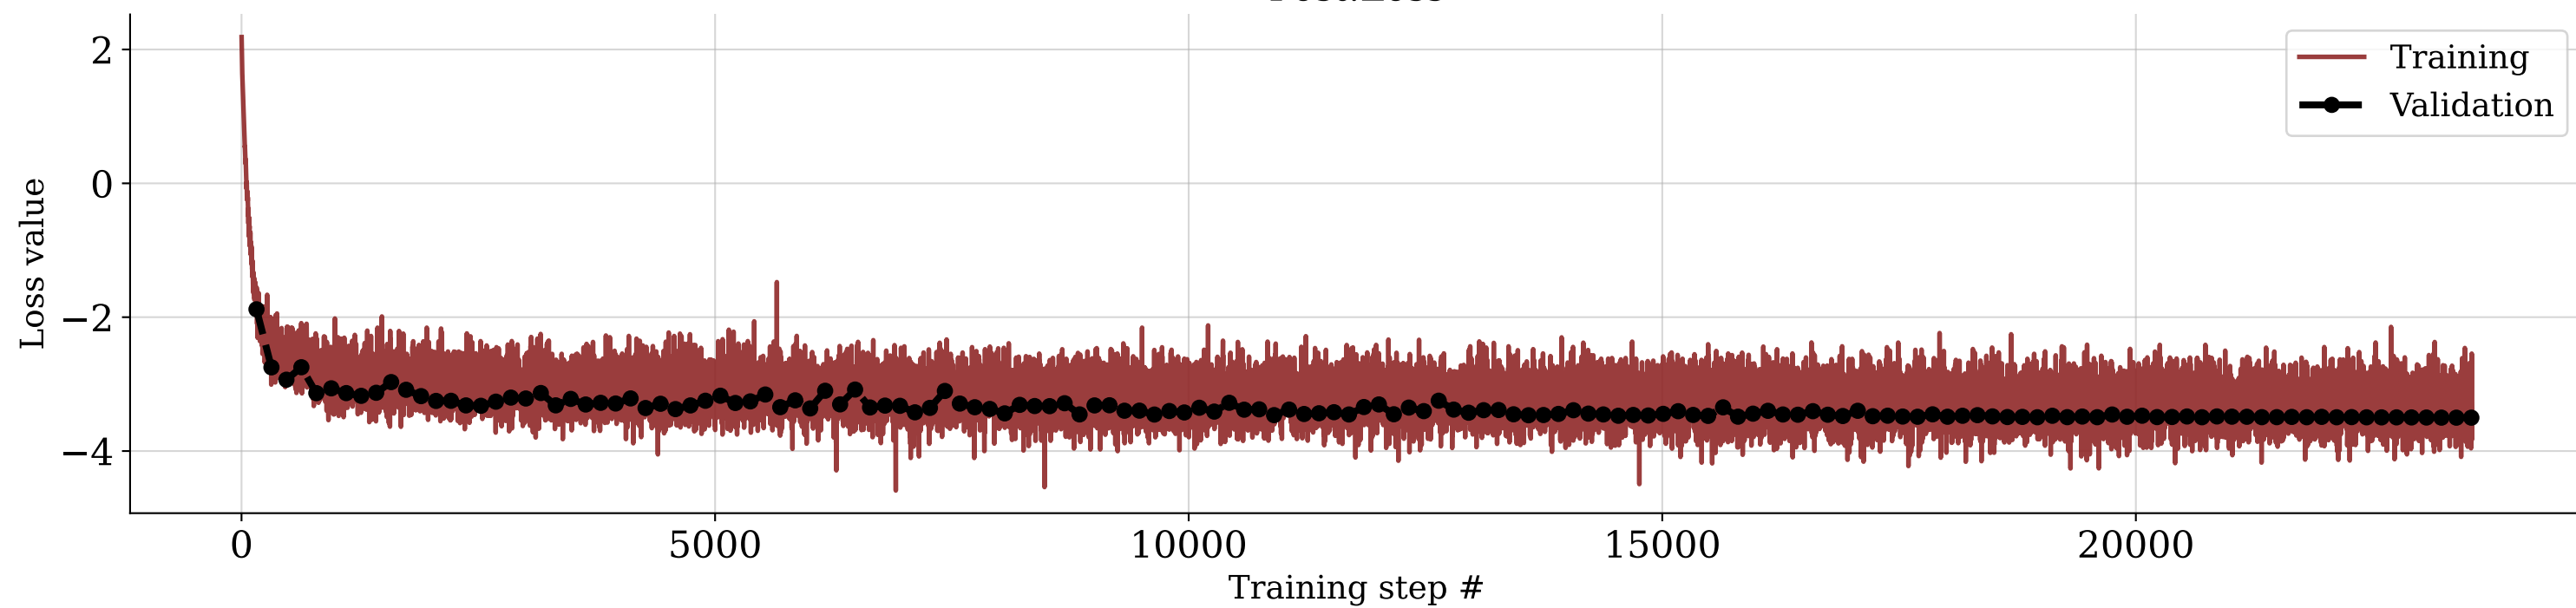

Lik.Loss

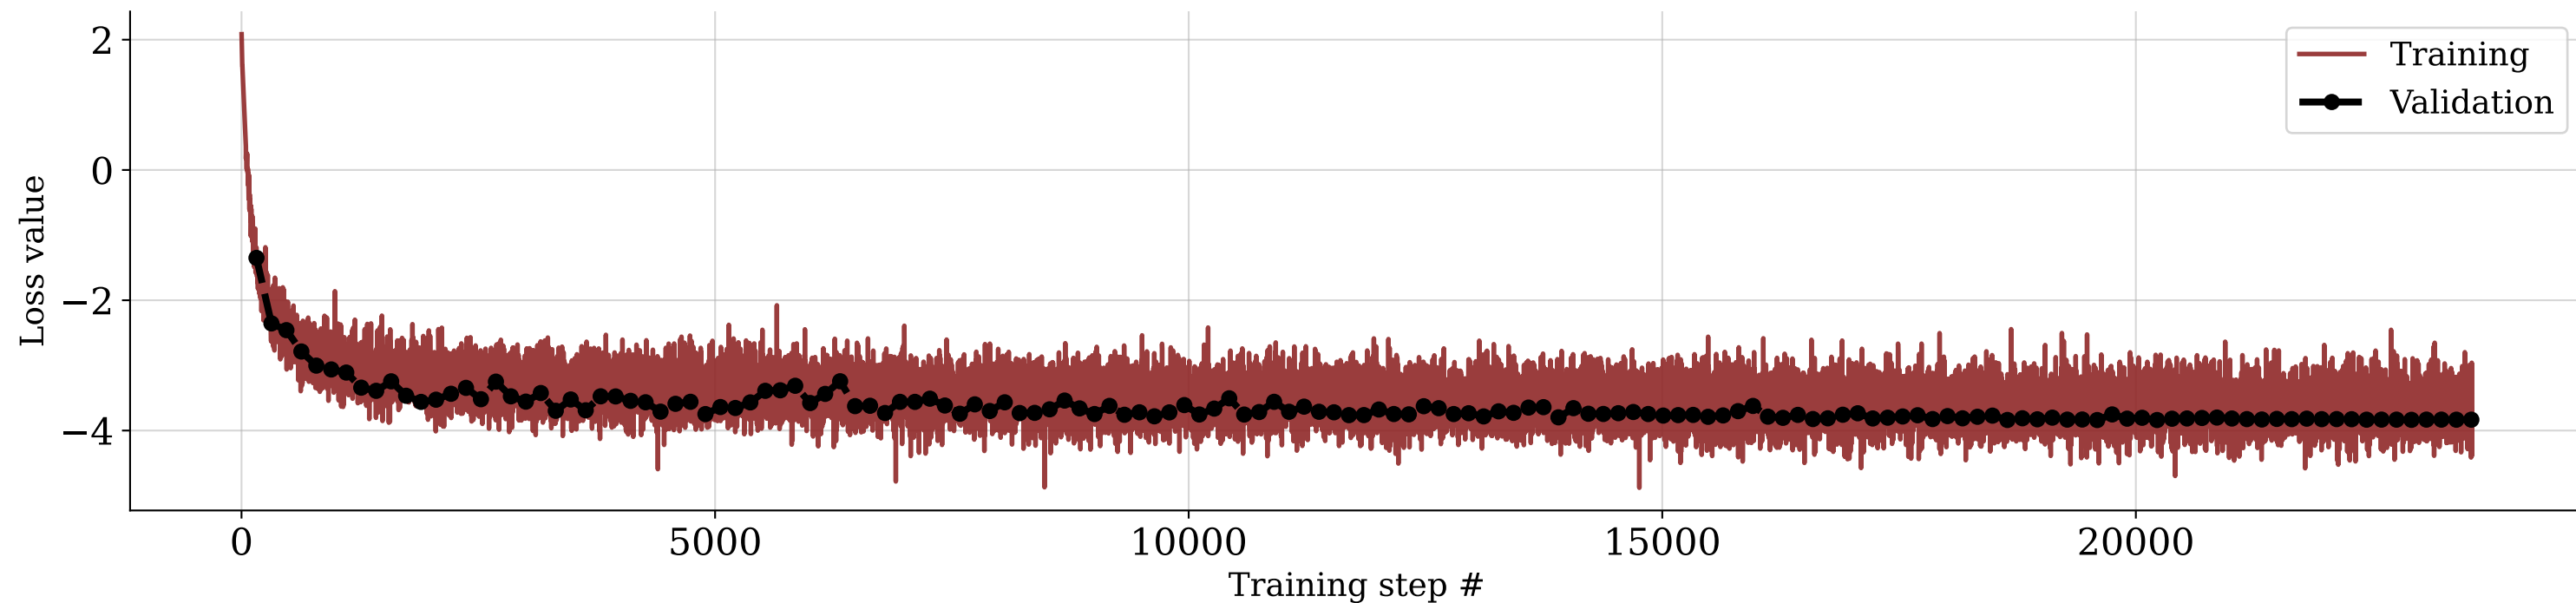

W.Decay

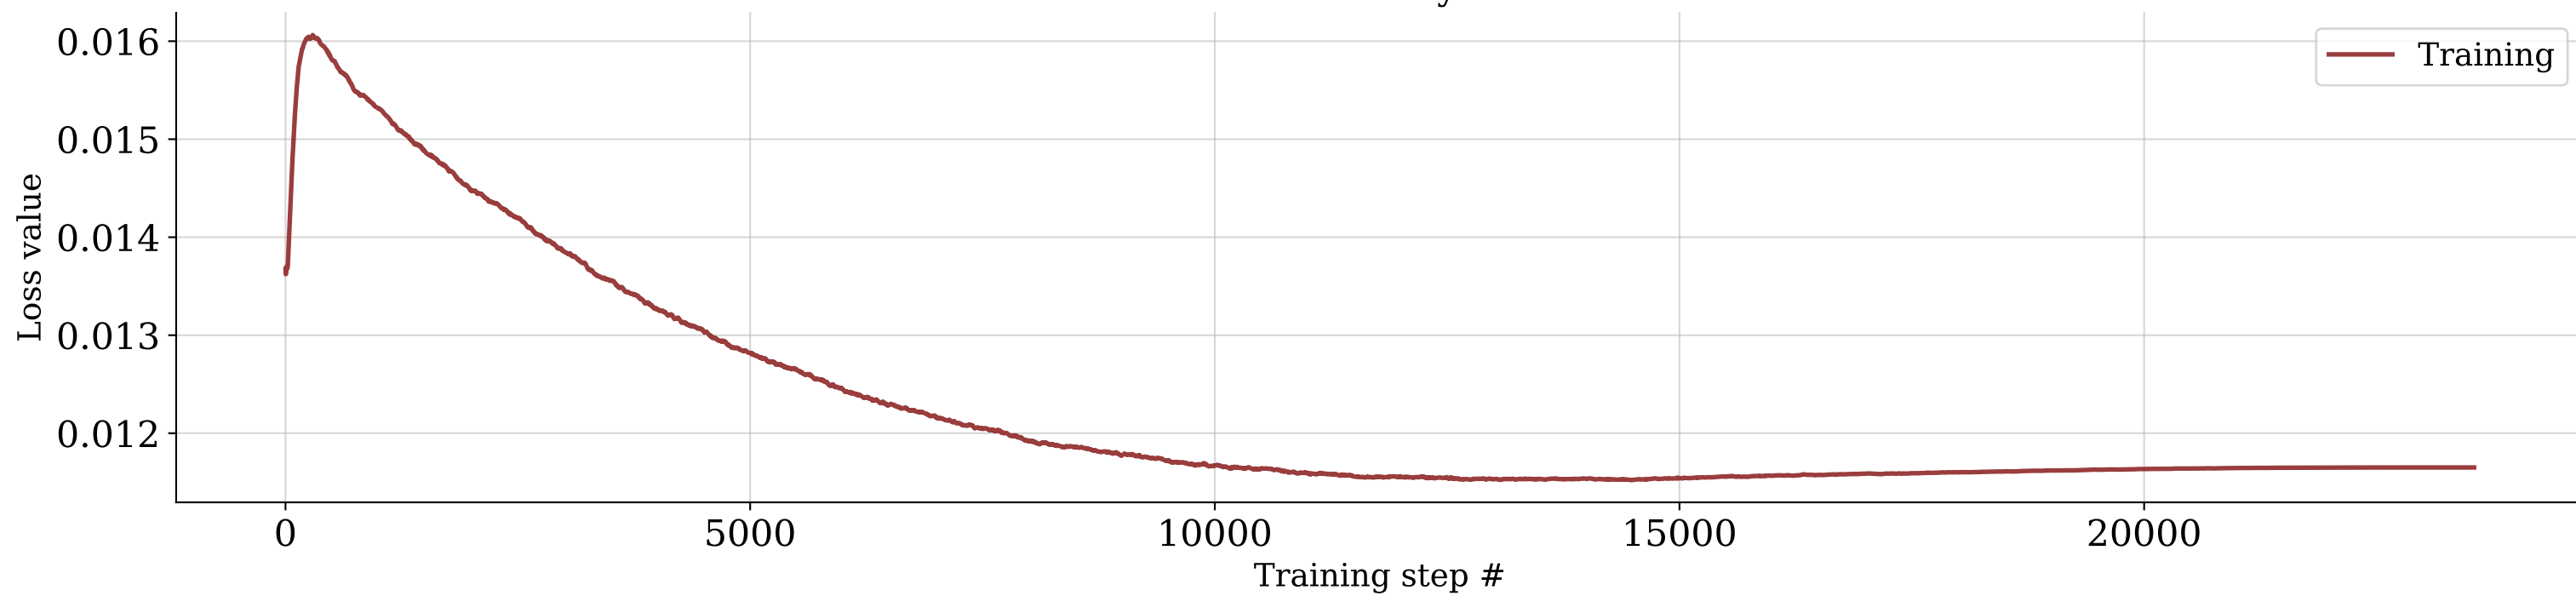

Supplement: supplementary_material [file attachment]

Post.Loss

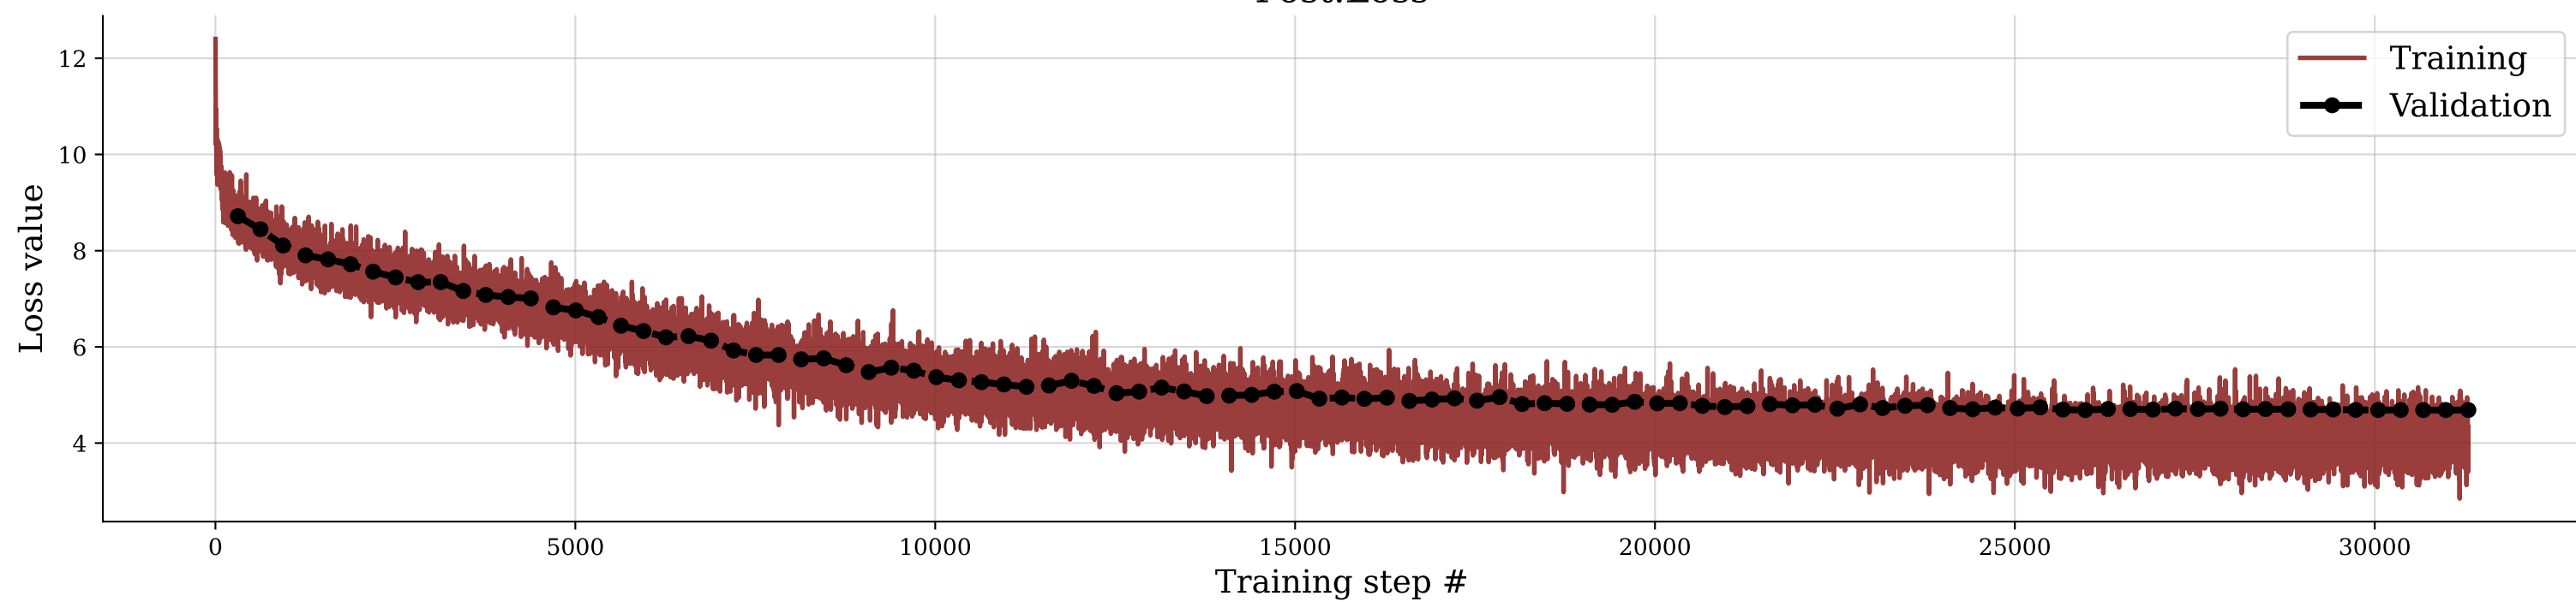

Lik.Loss

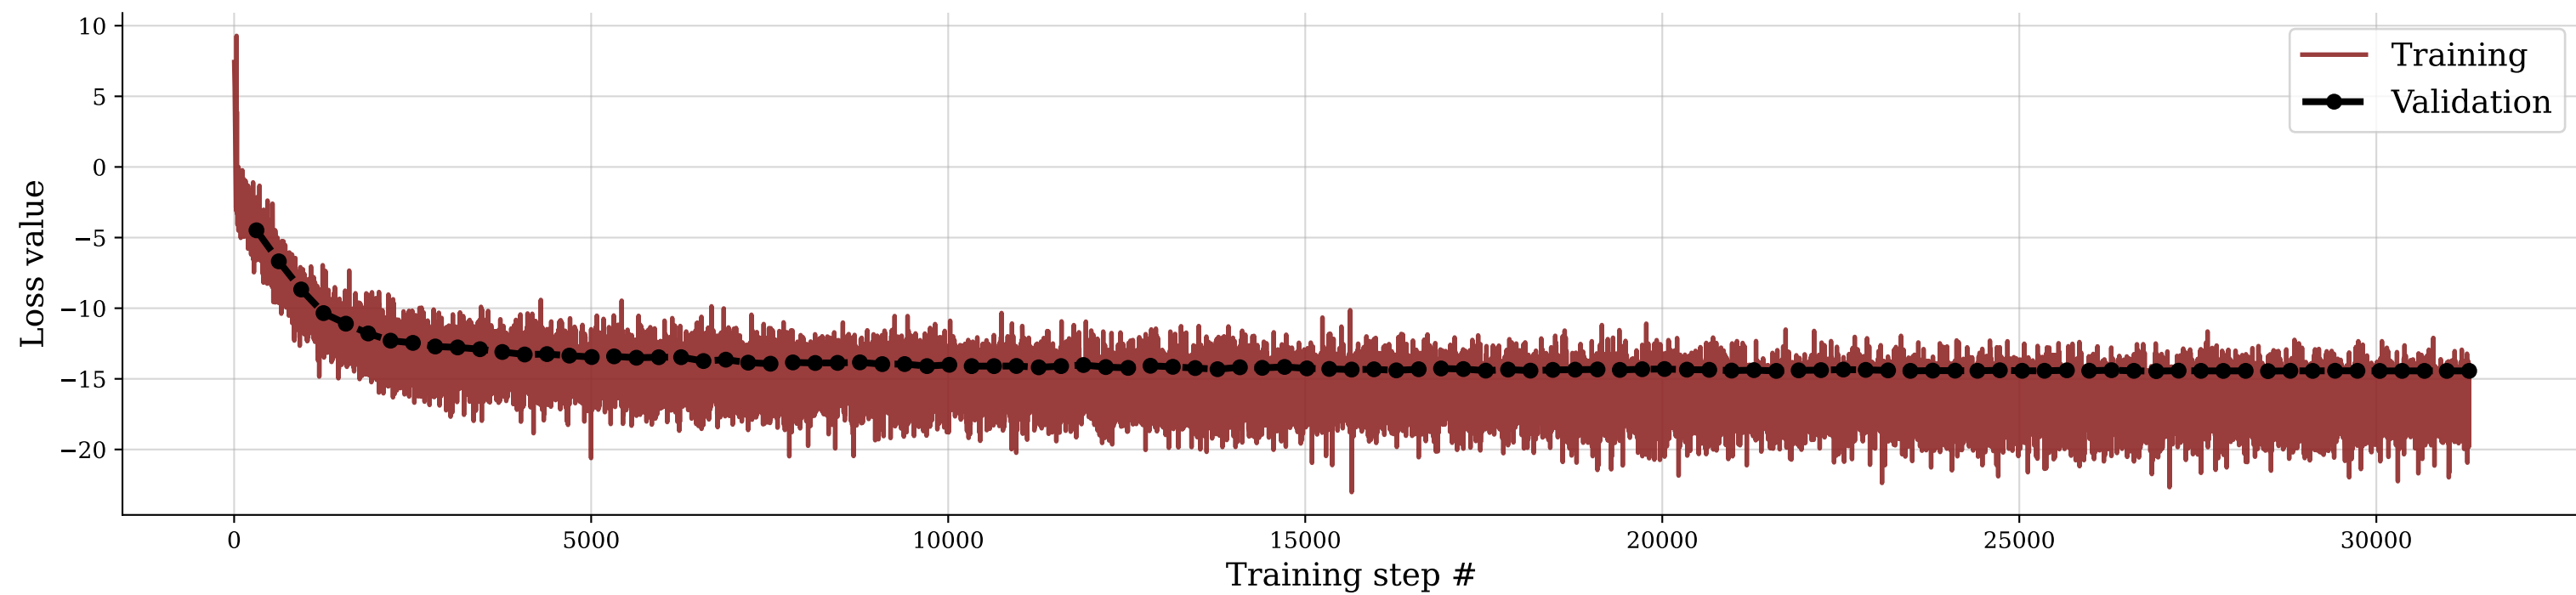

W.Decay

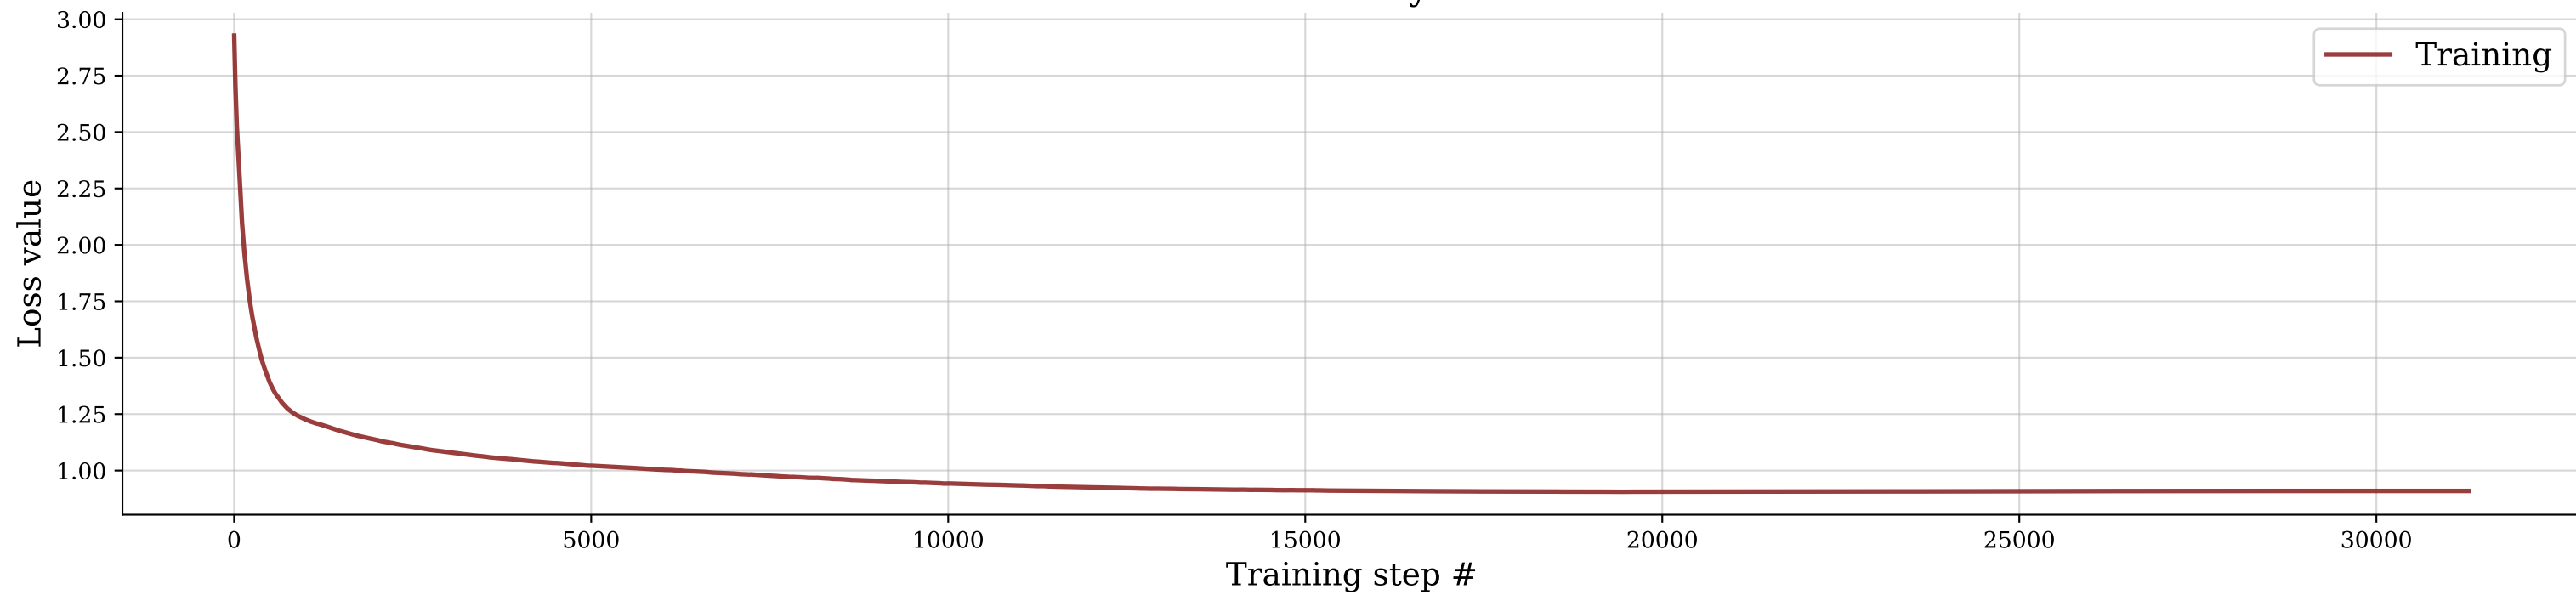

Supplement: supplementary_material [file attachment]

0.15

0.10

SNL

SNVI

SNPLA

JANA

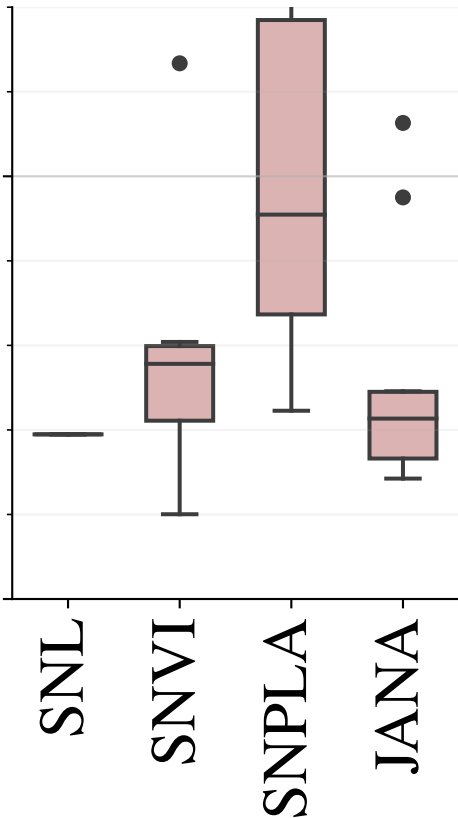

Supplement: supplementary_material [file attachment]

True

gSMC

NPE-C

SNRE-B

SNPE-C

SNVI

SNPLA

JANA

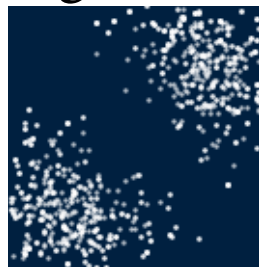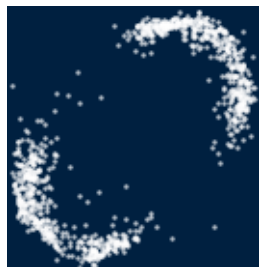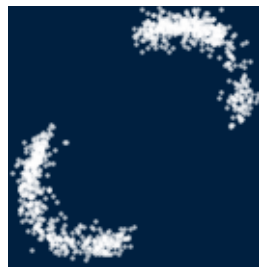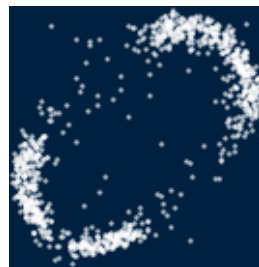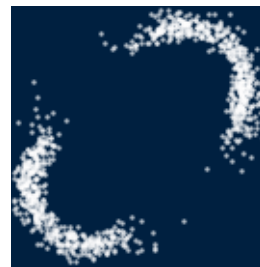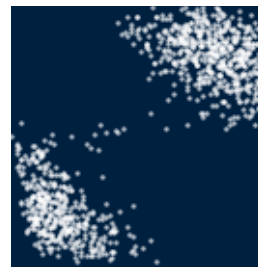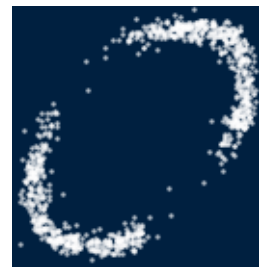 $N = 2000$ 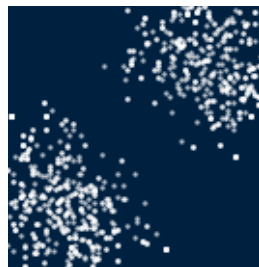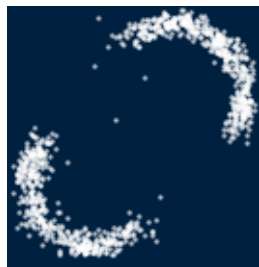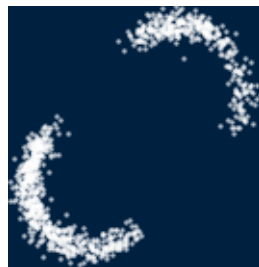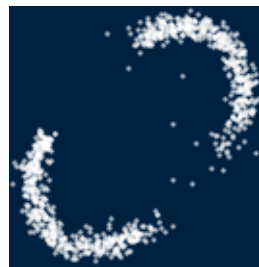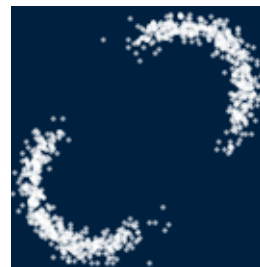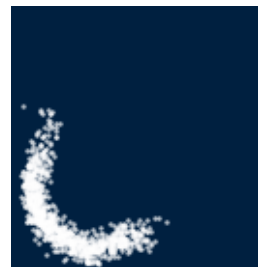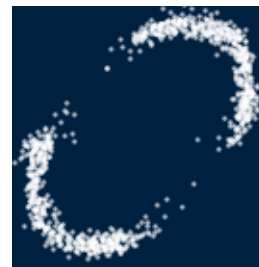 $N = 6000$ 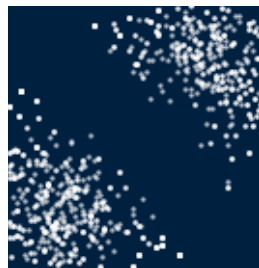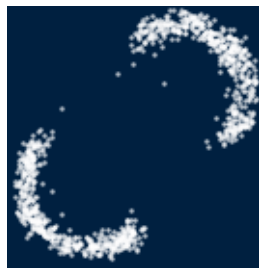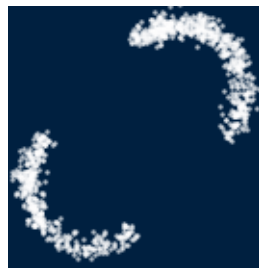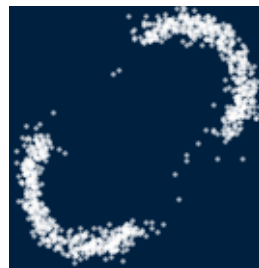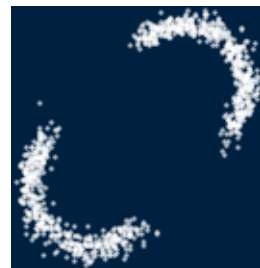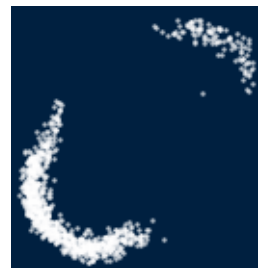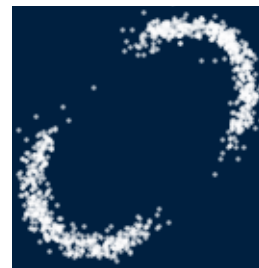 $N = 10000$

Supplement: supplementary_material [file attachment]

Surrogate

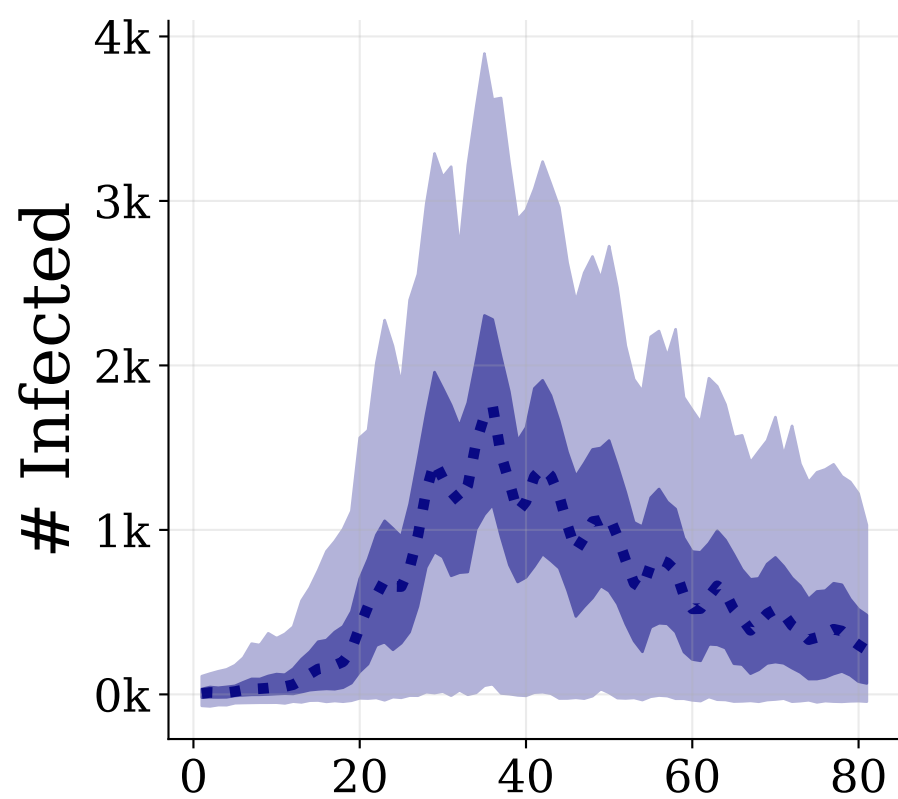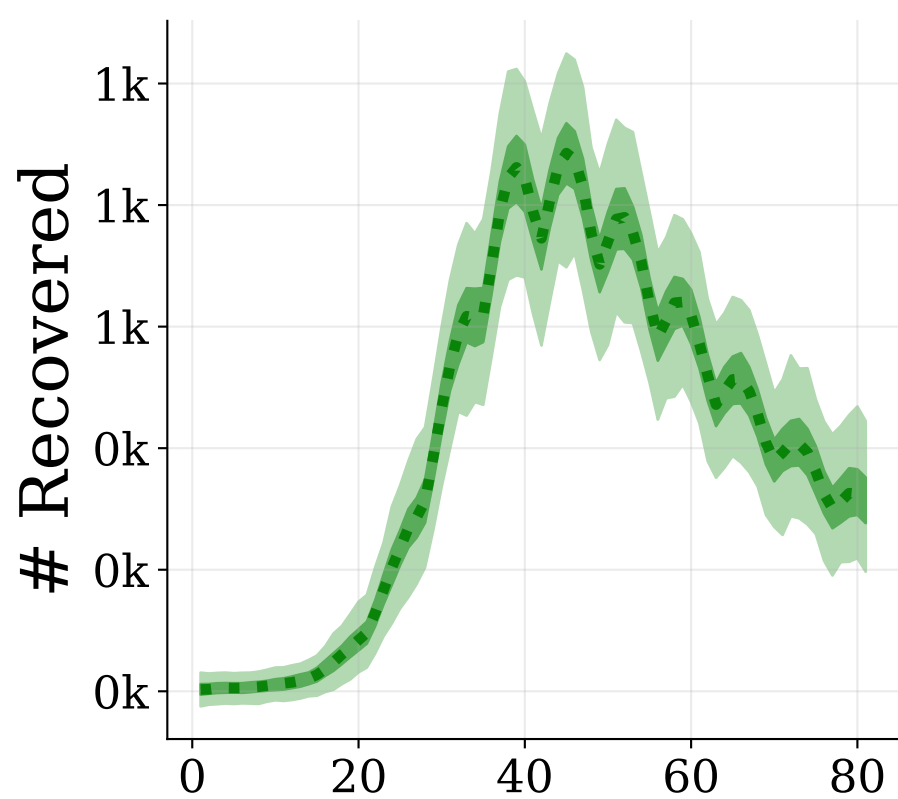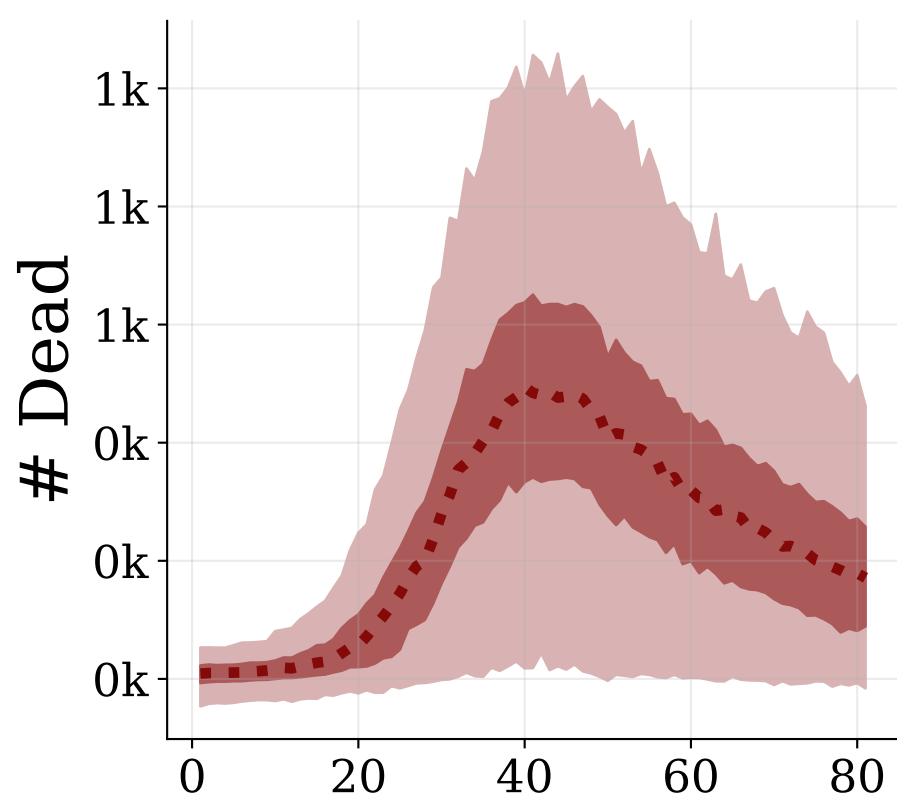

Simulator

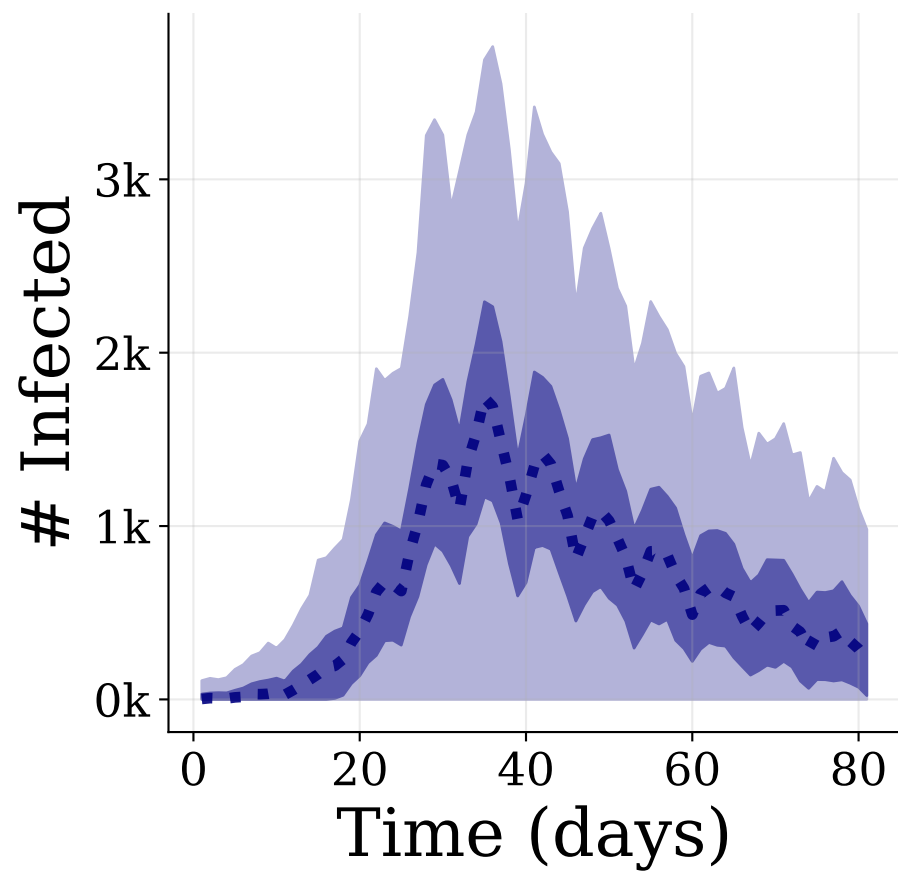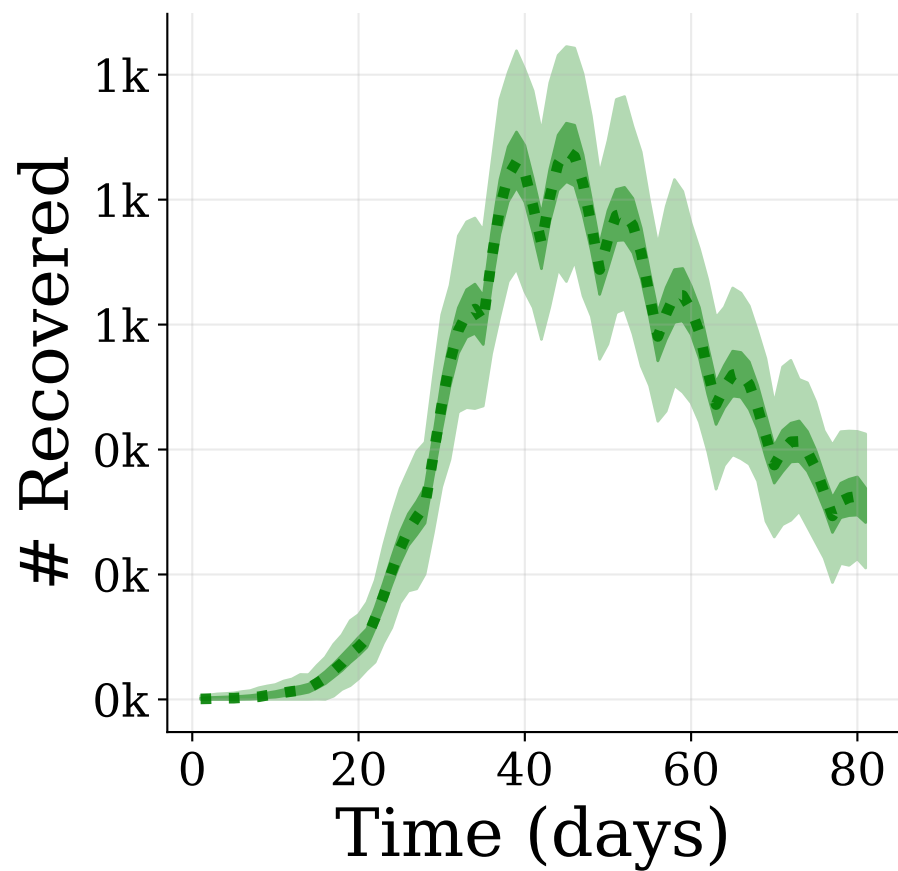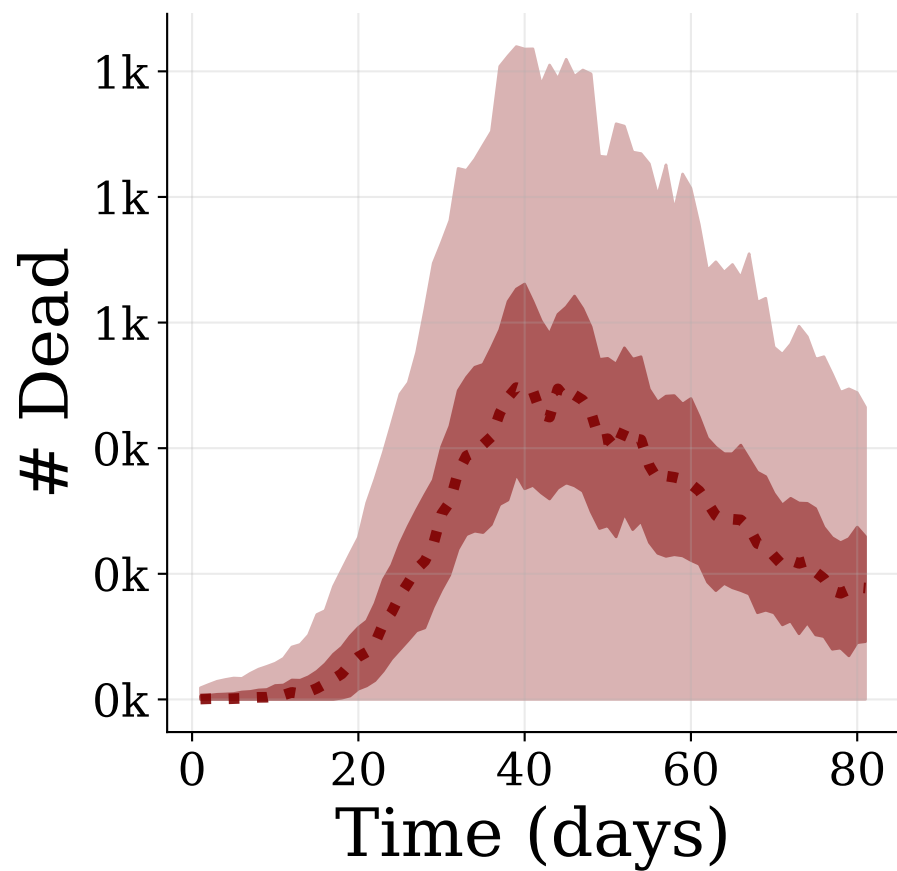

Supplement: supplementary_material [file attachment]

0.15

0.10

SNL

SNVI

SNPLA

JANA

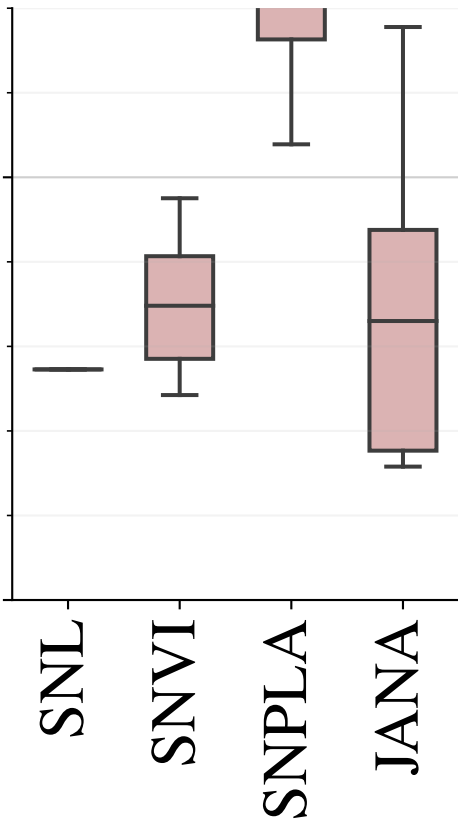

Supplement: supplementary_material [file attachment]

ECDF difference

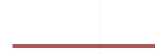

Rank ECDFs

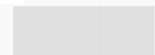

95% Confidence Bands

0.04

0.02

0.00

-0.02

-0.04

-0.06

0.0

0.2

0.4

0.6

0.8

1.0

Fractional rank statistic

Supplement: supplementary_material [file attachment]

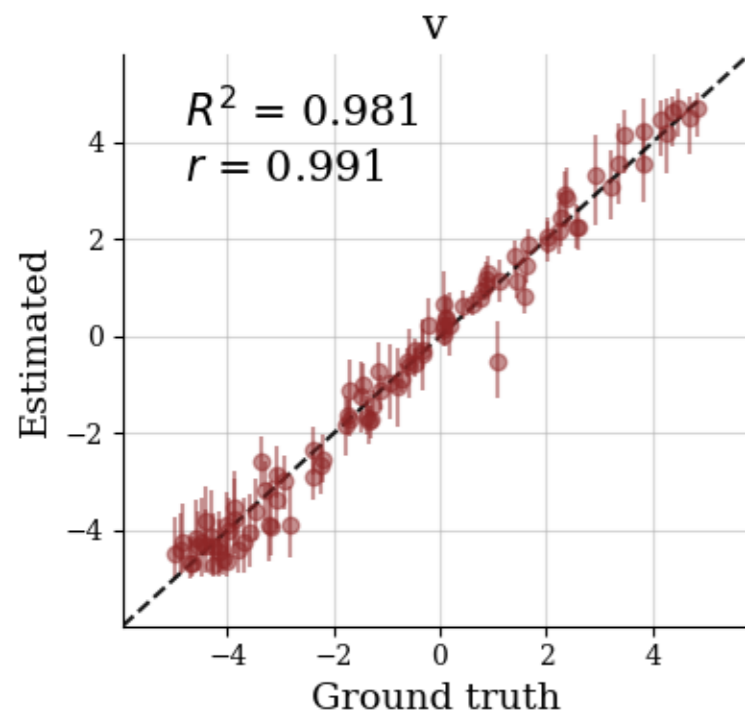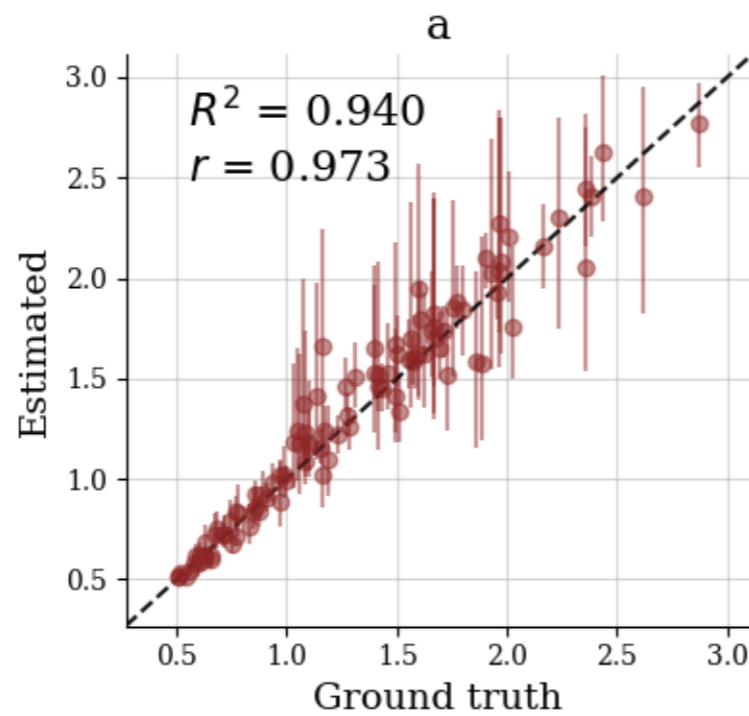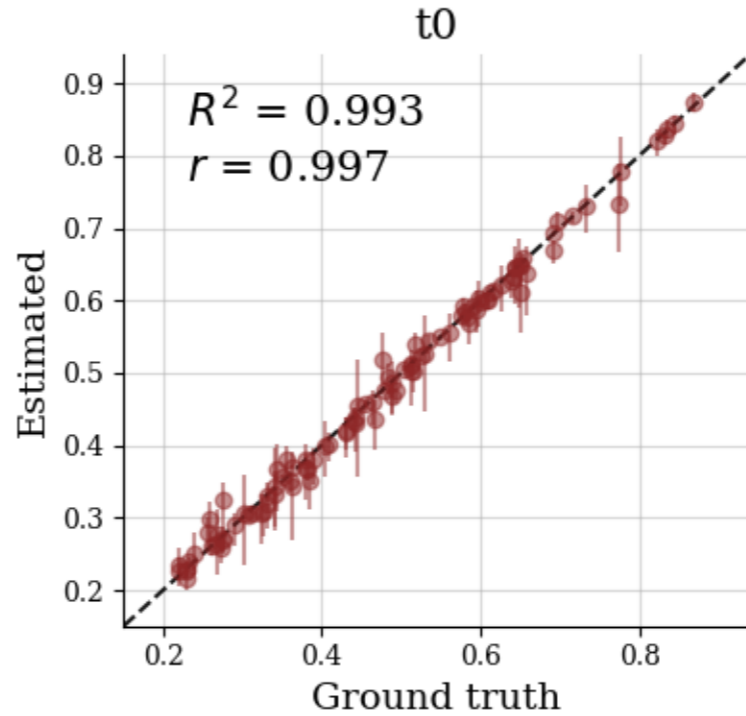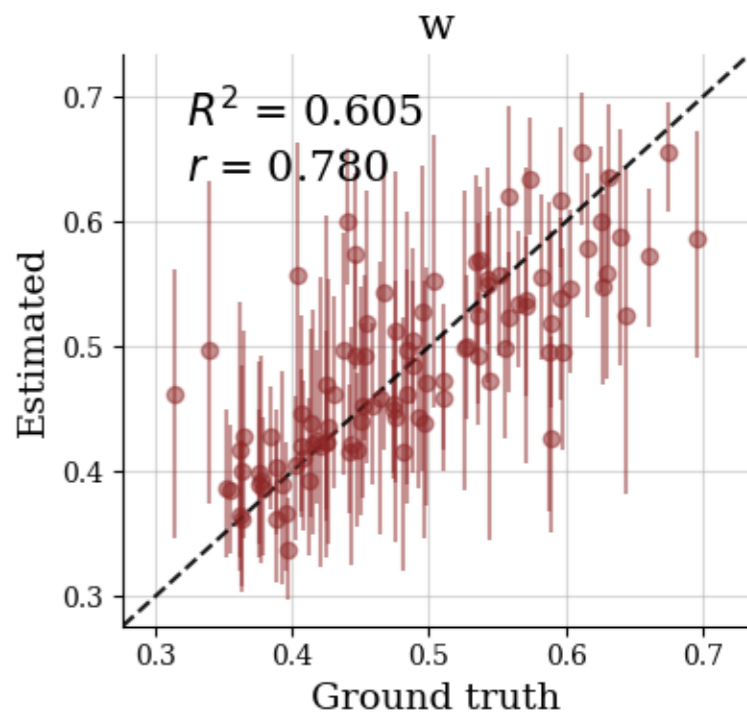

Supplement: supplementary_material [file attachment]

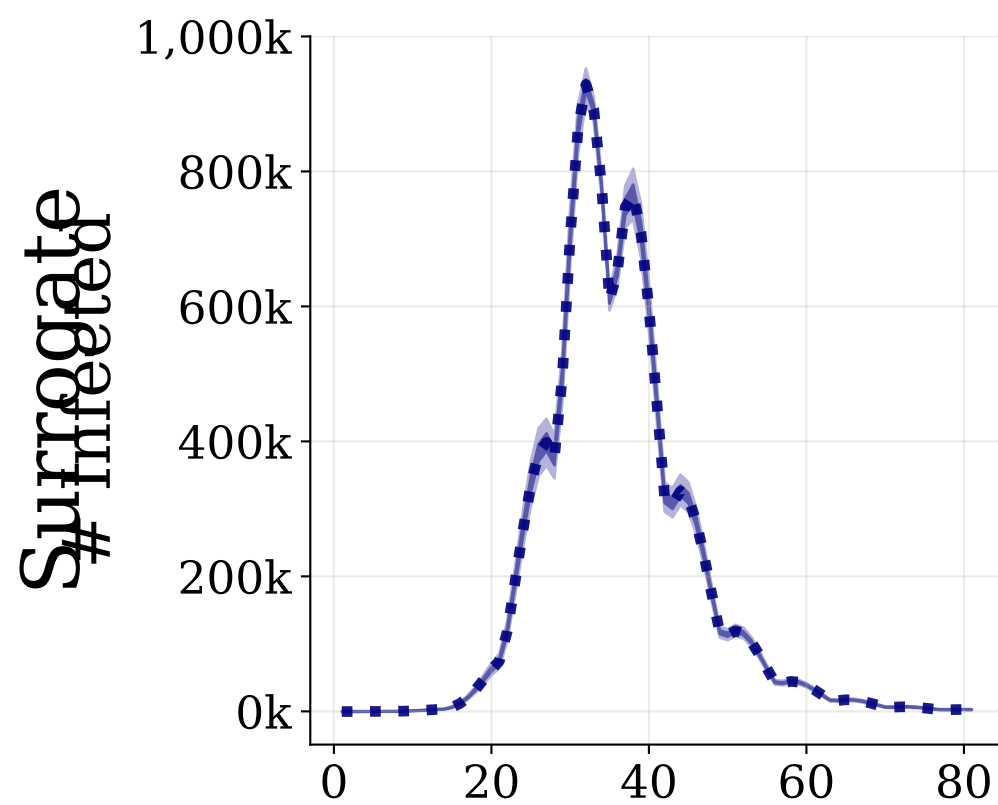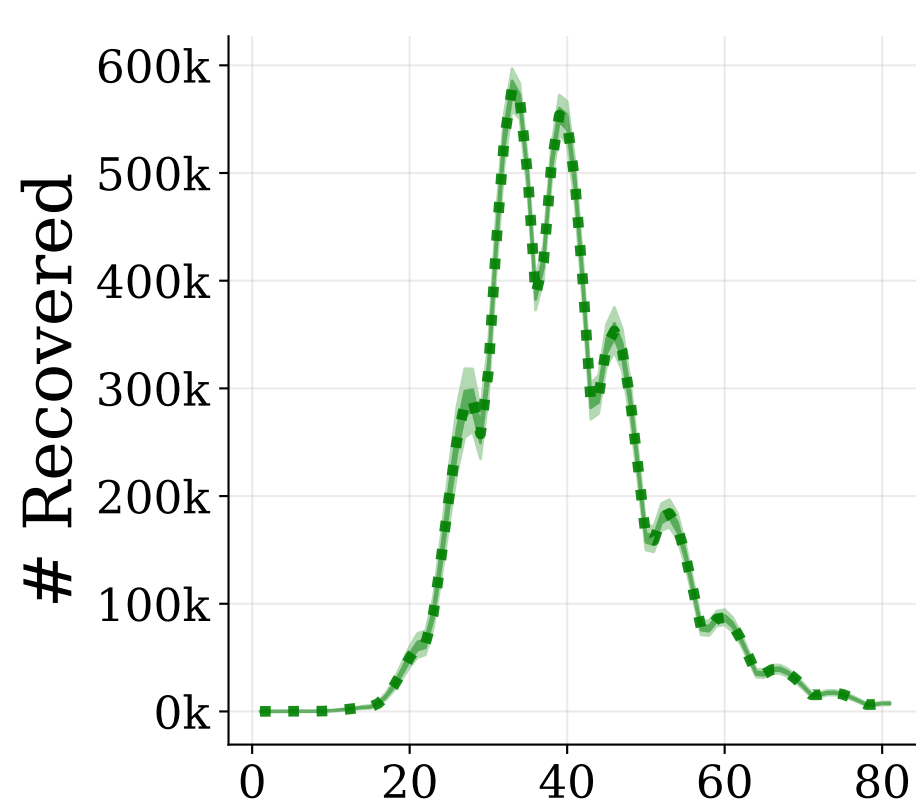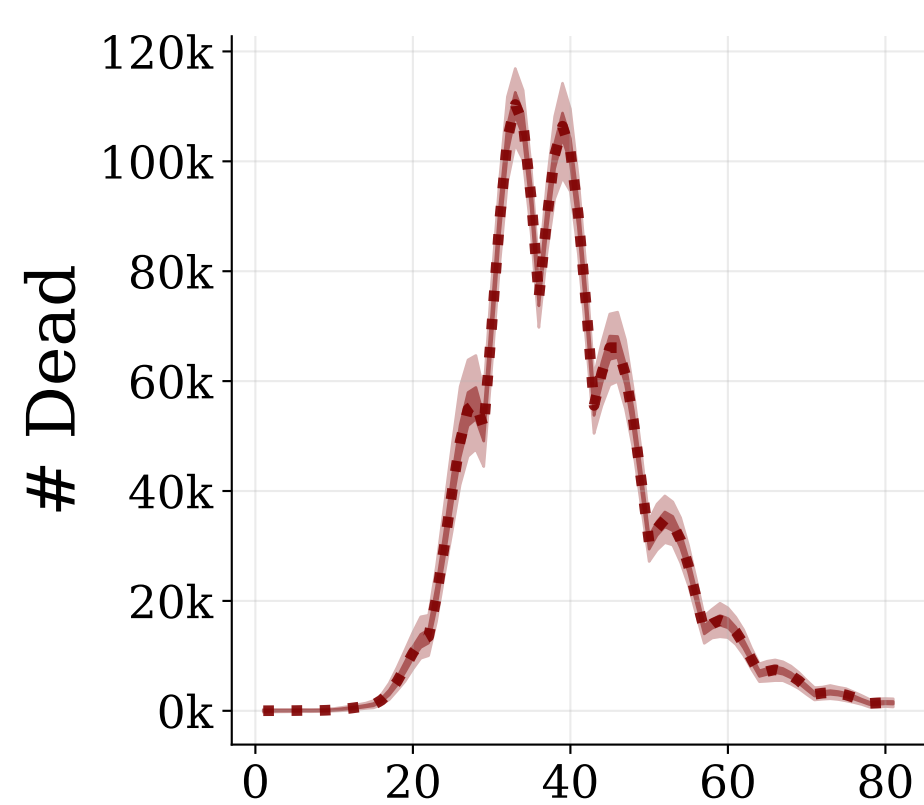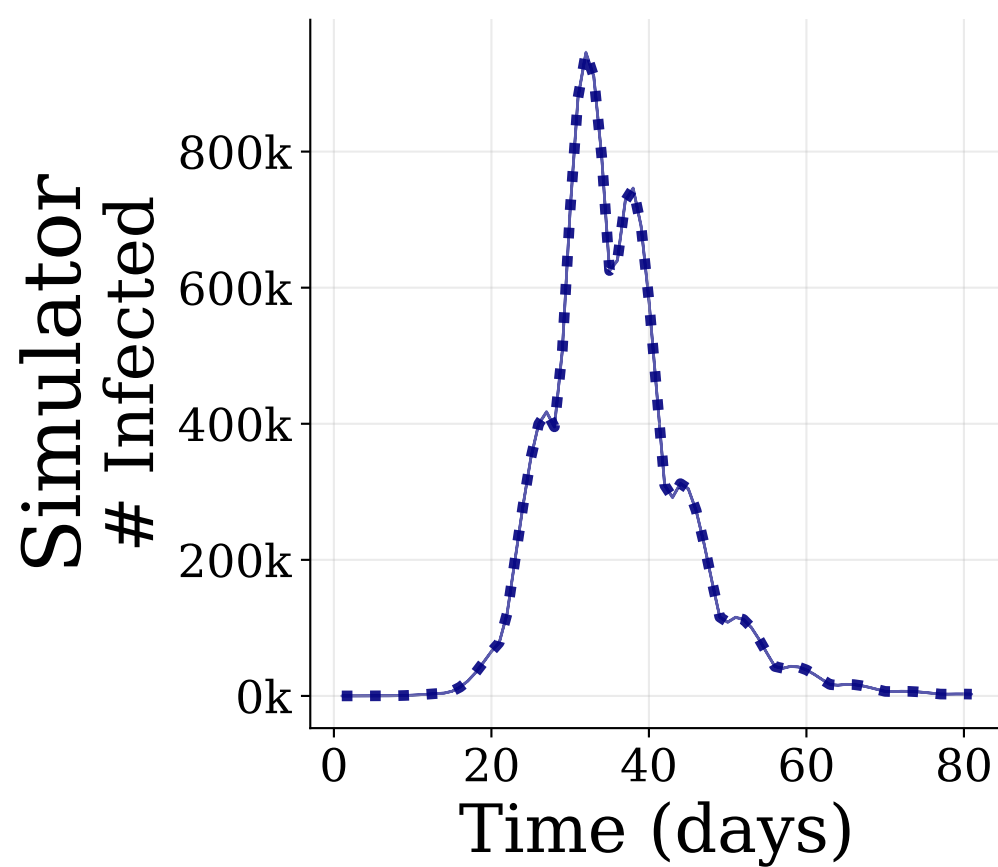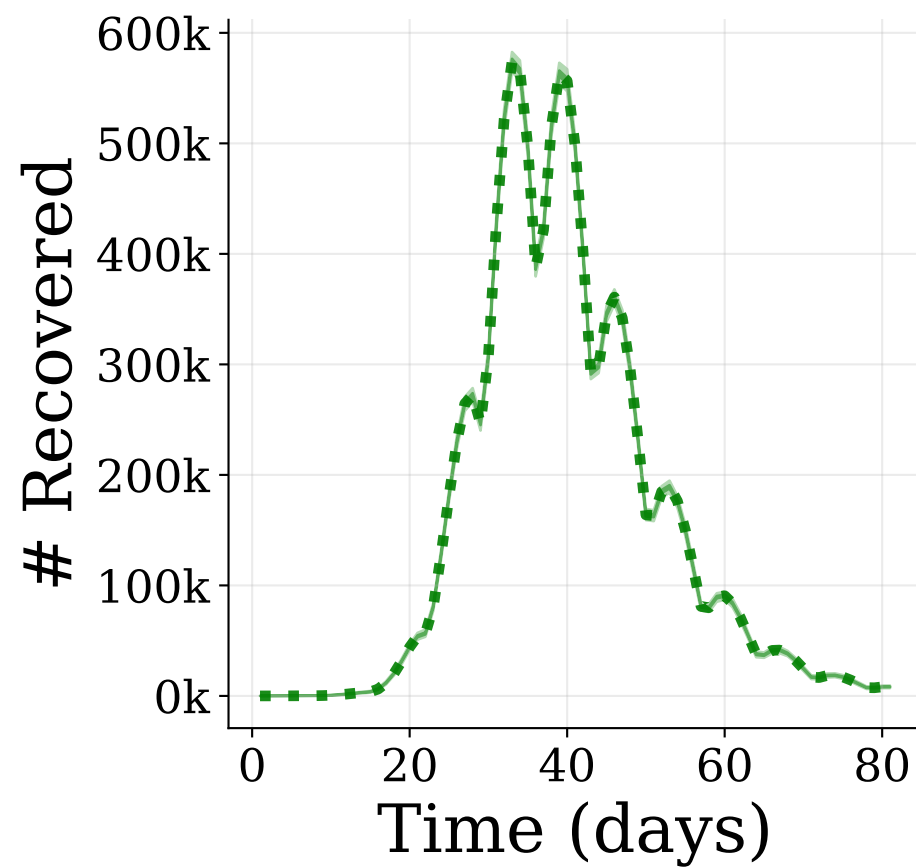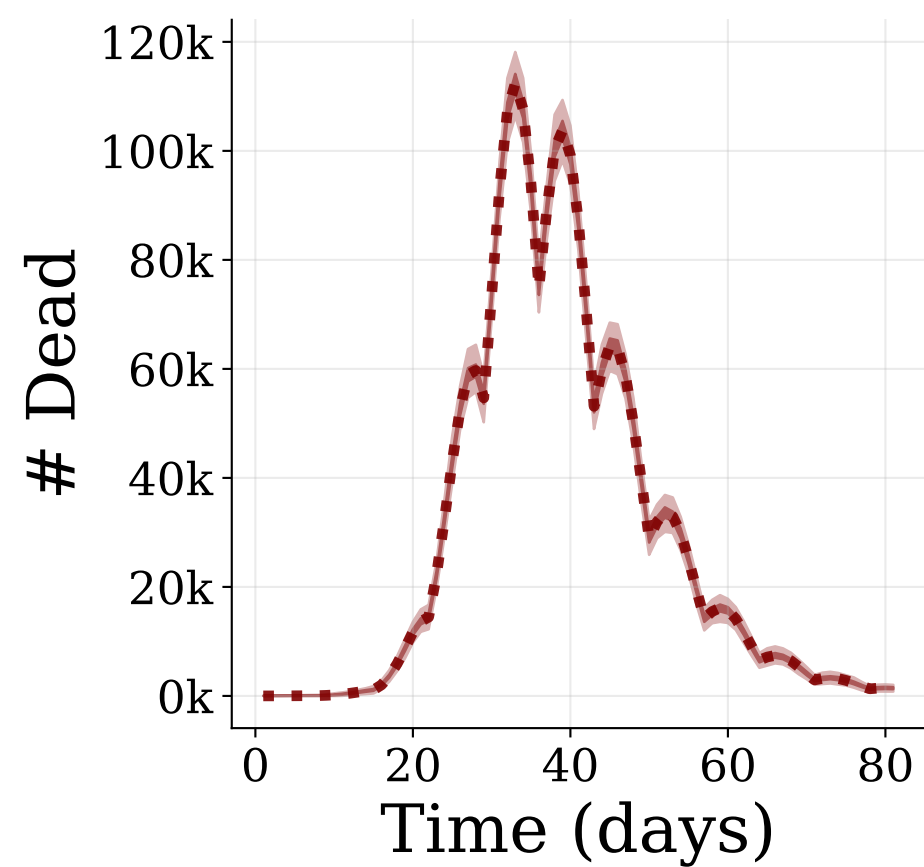

Supplement: supplementary_material [file attachment]

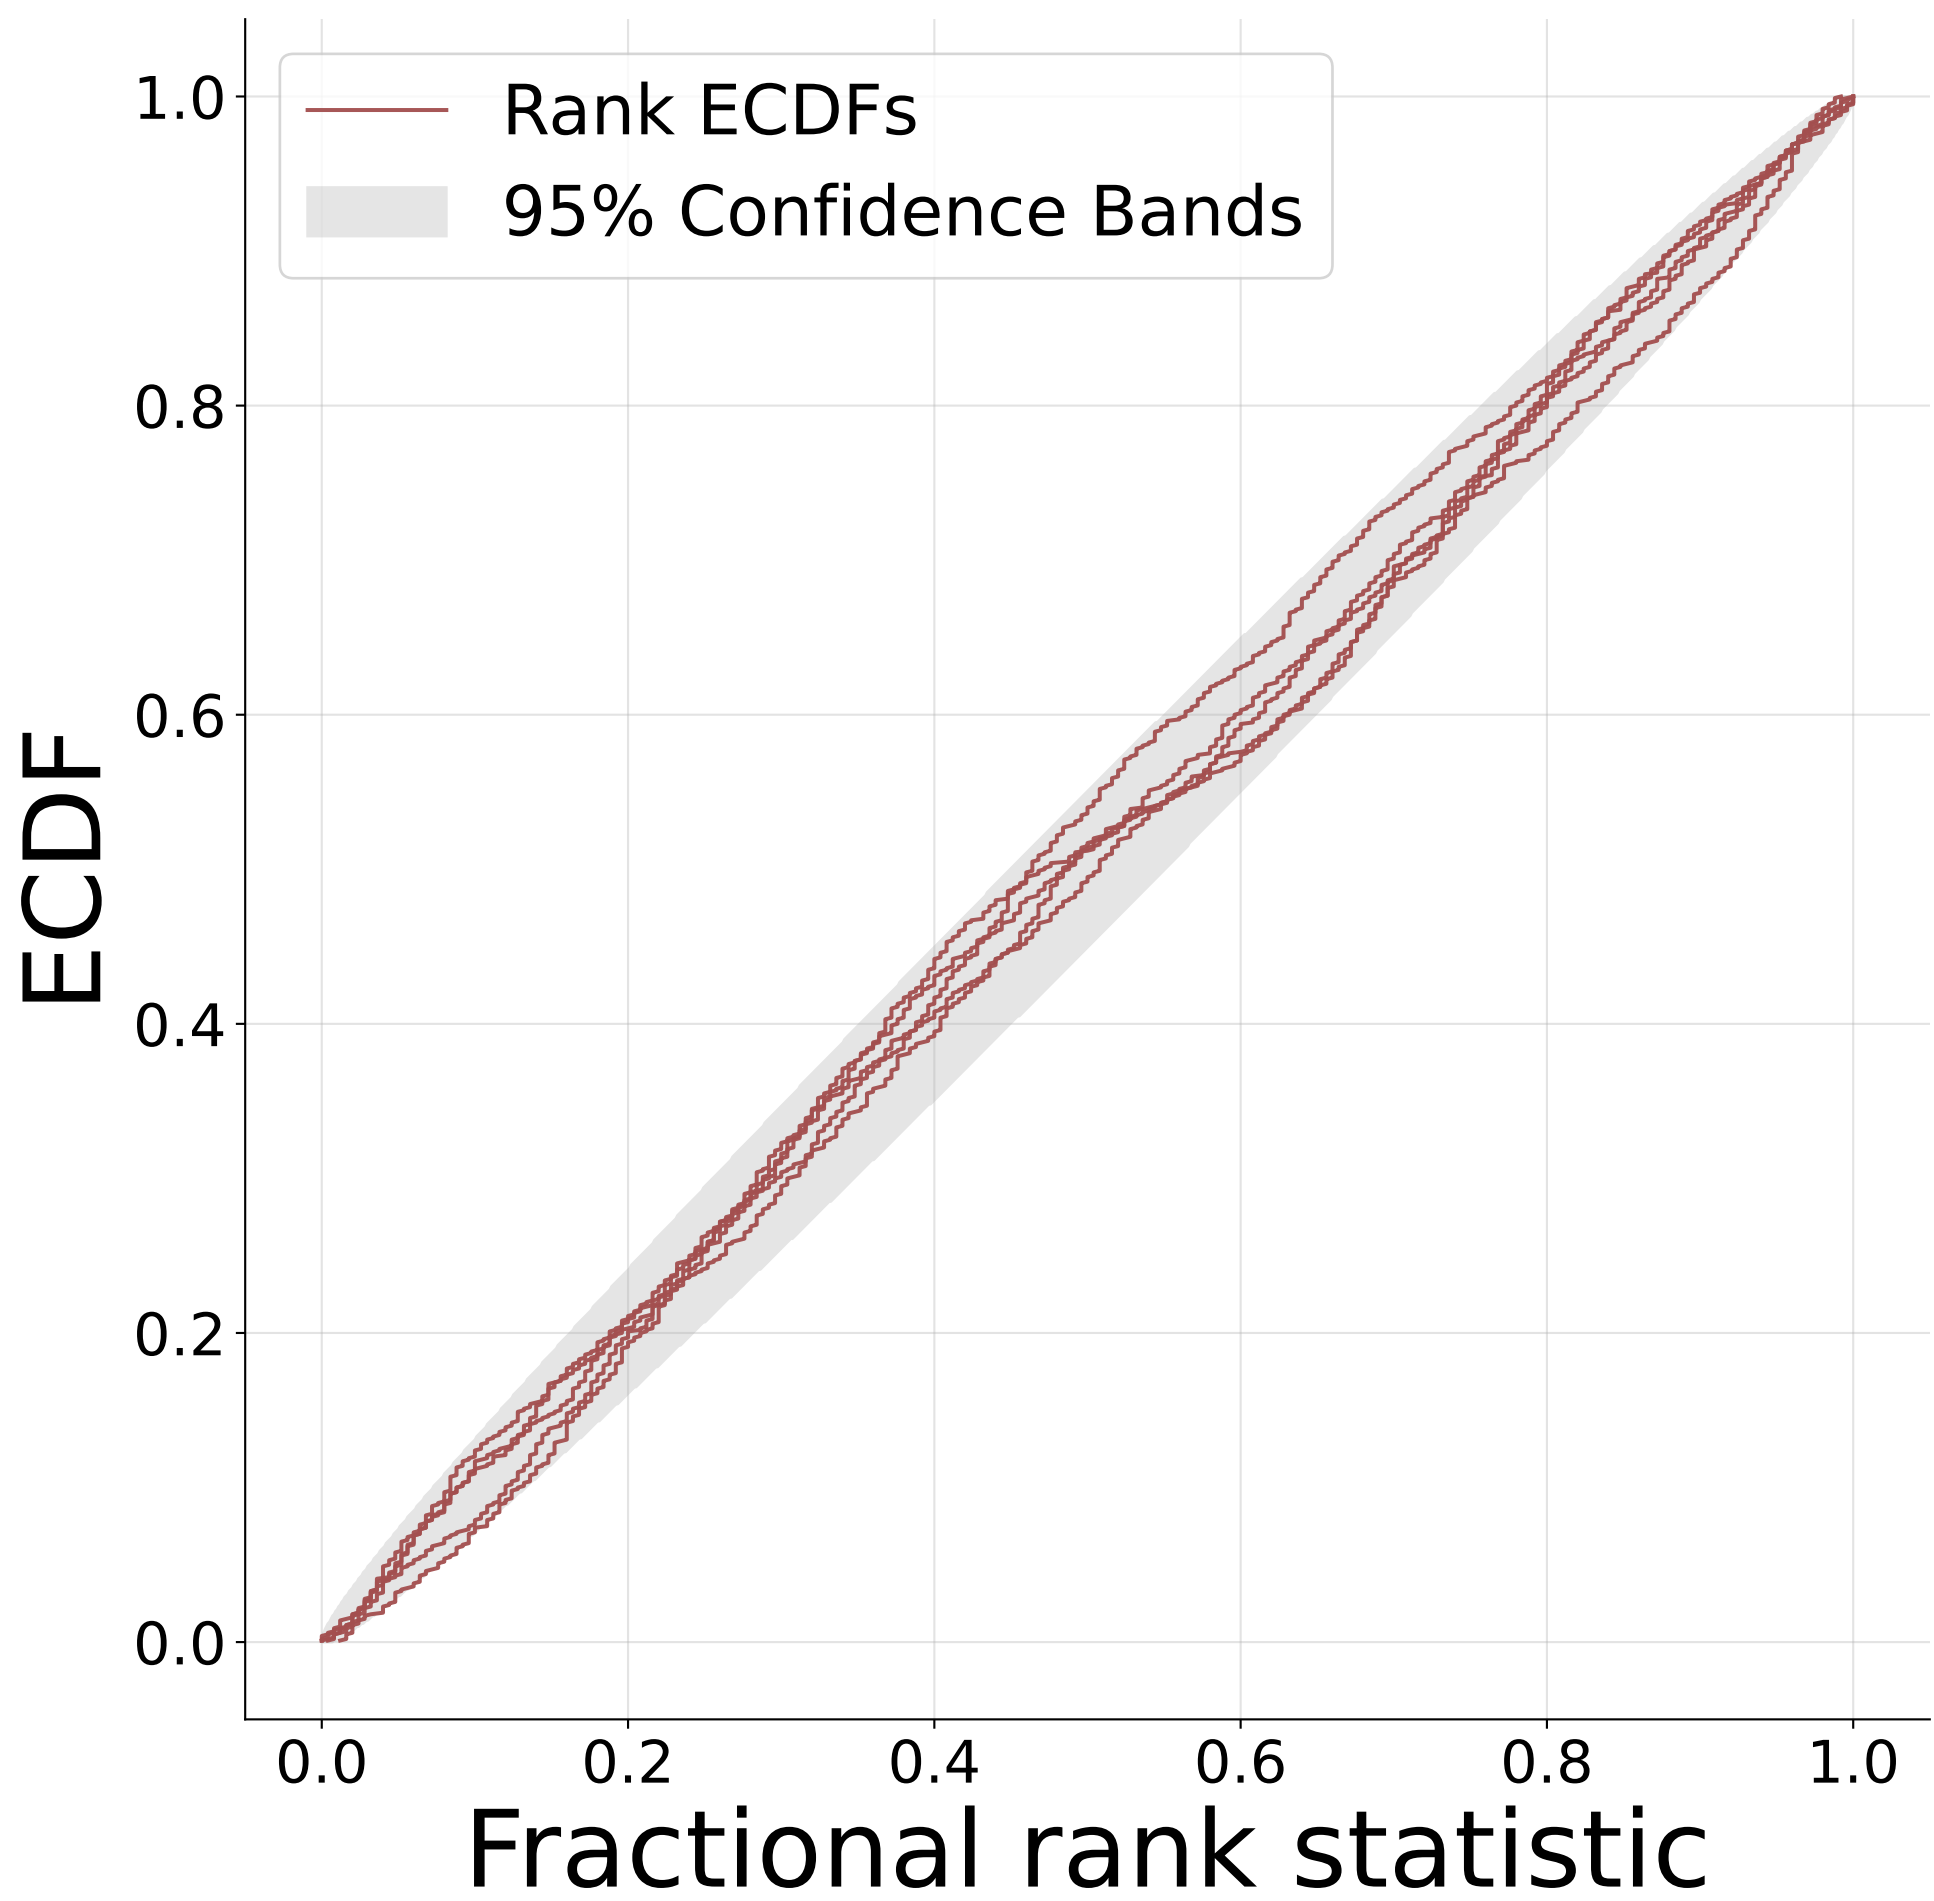

Supplement: supplementary_material [file attachment]

Surrogate

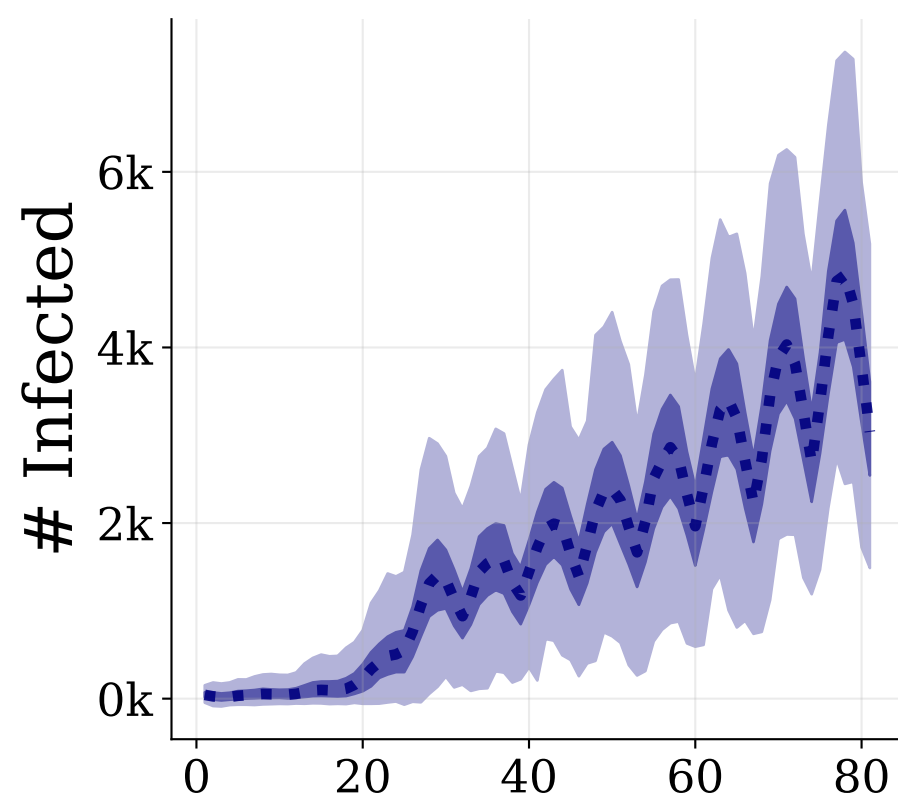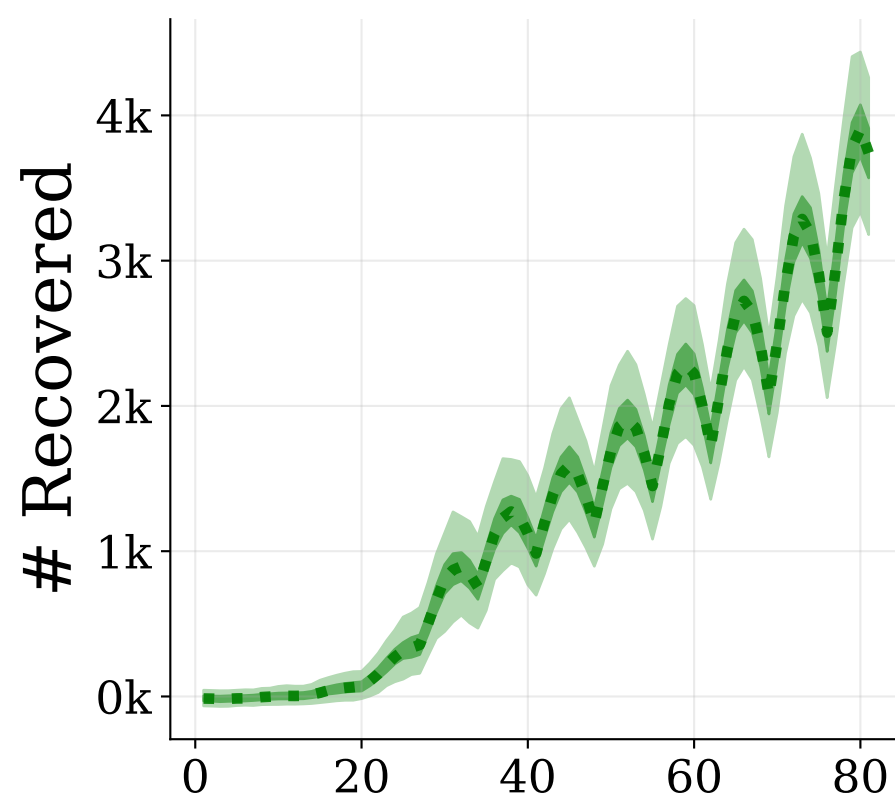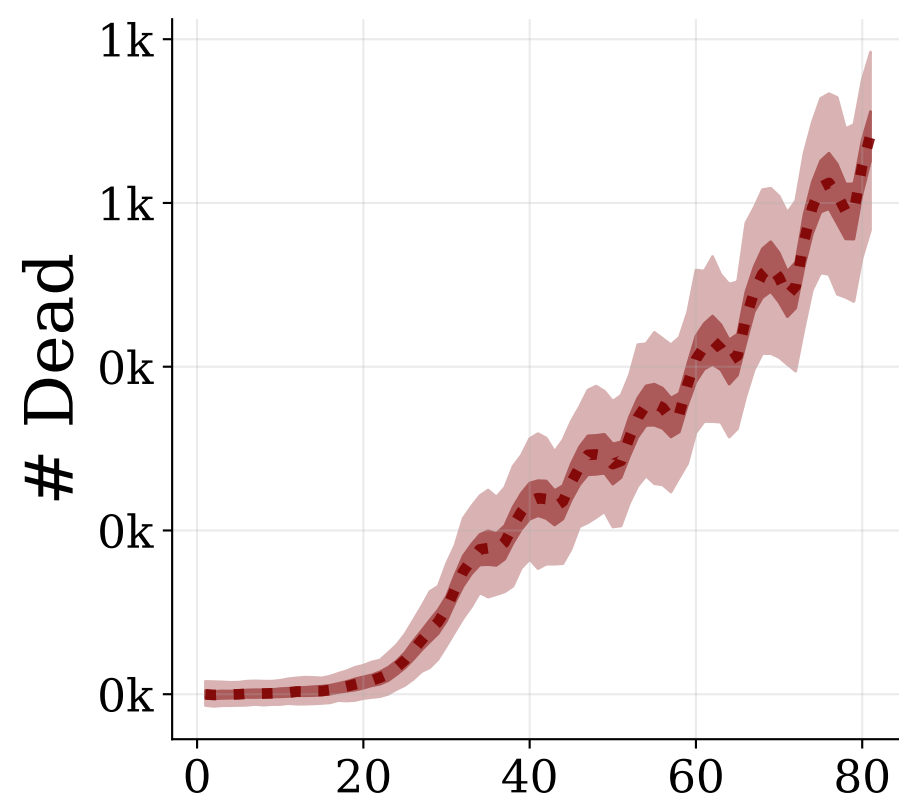

Simulator

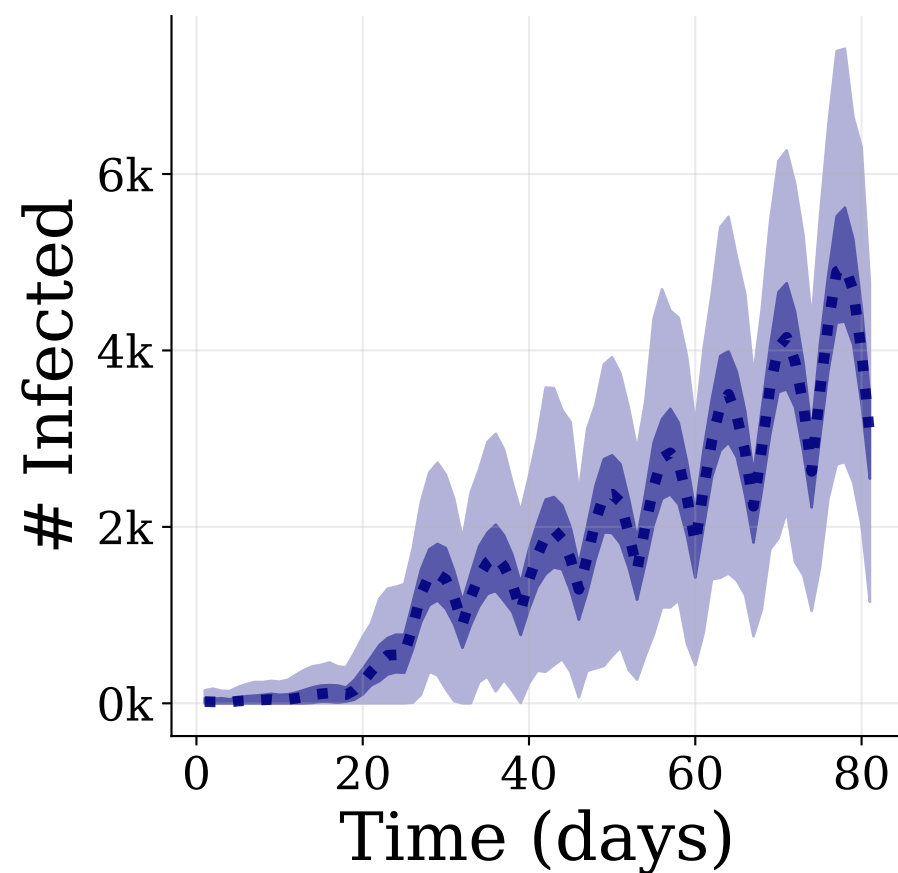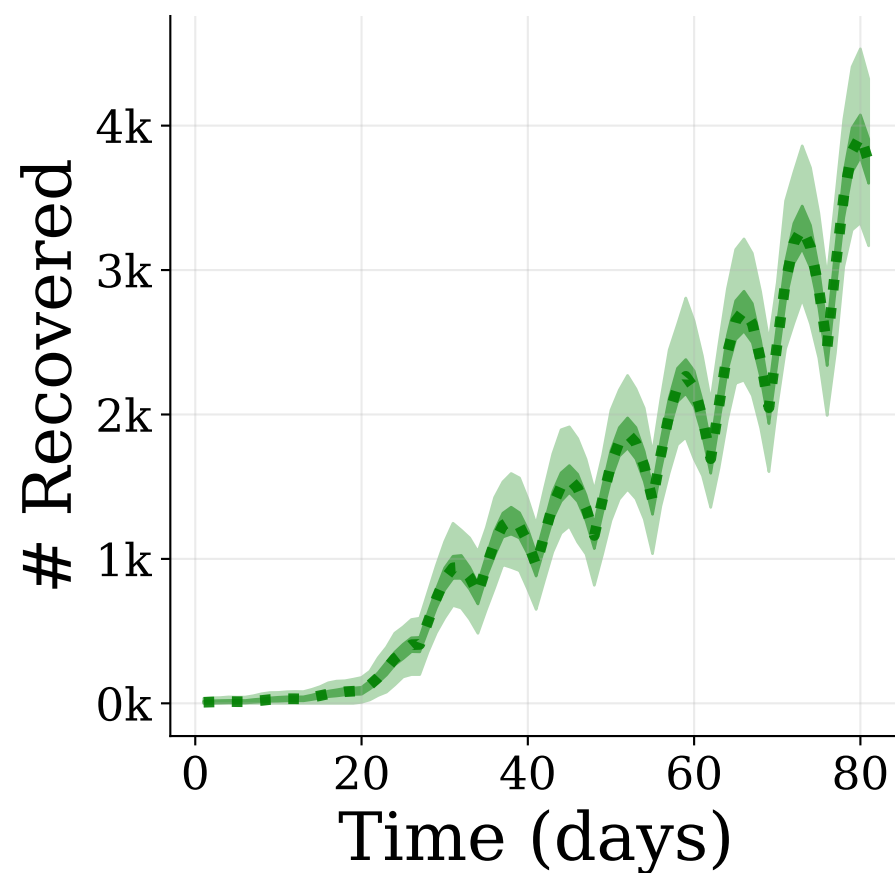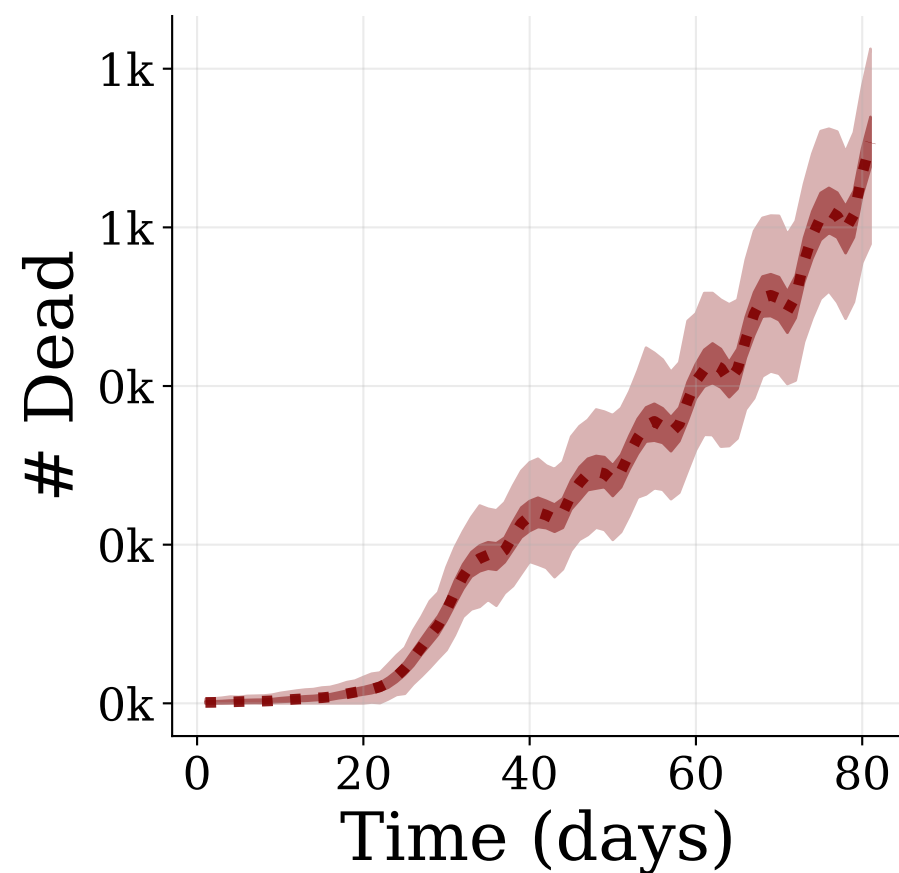

Supplement: supplementary_material [file attachment]

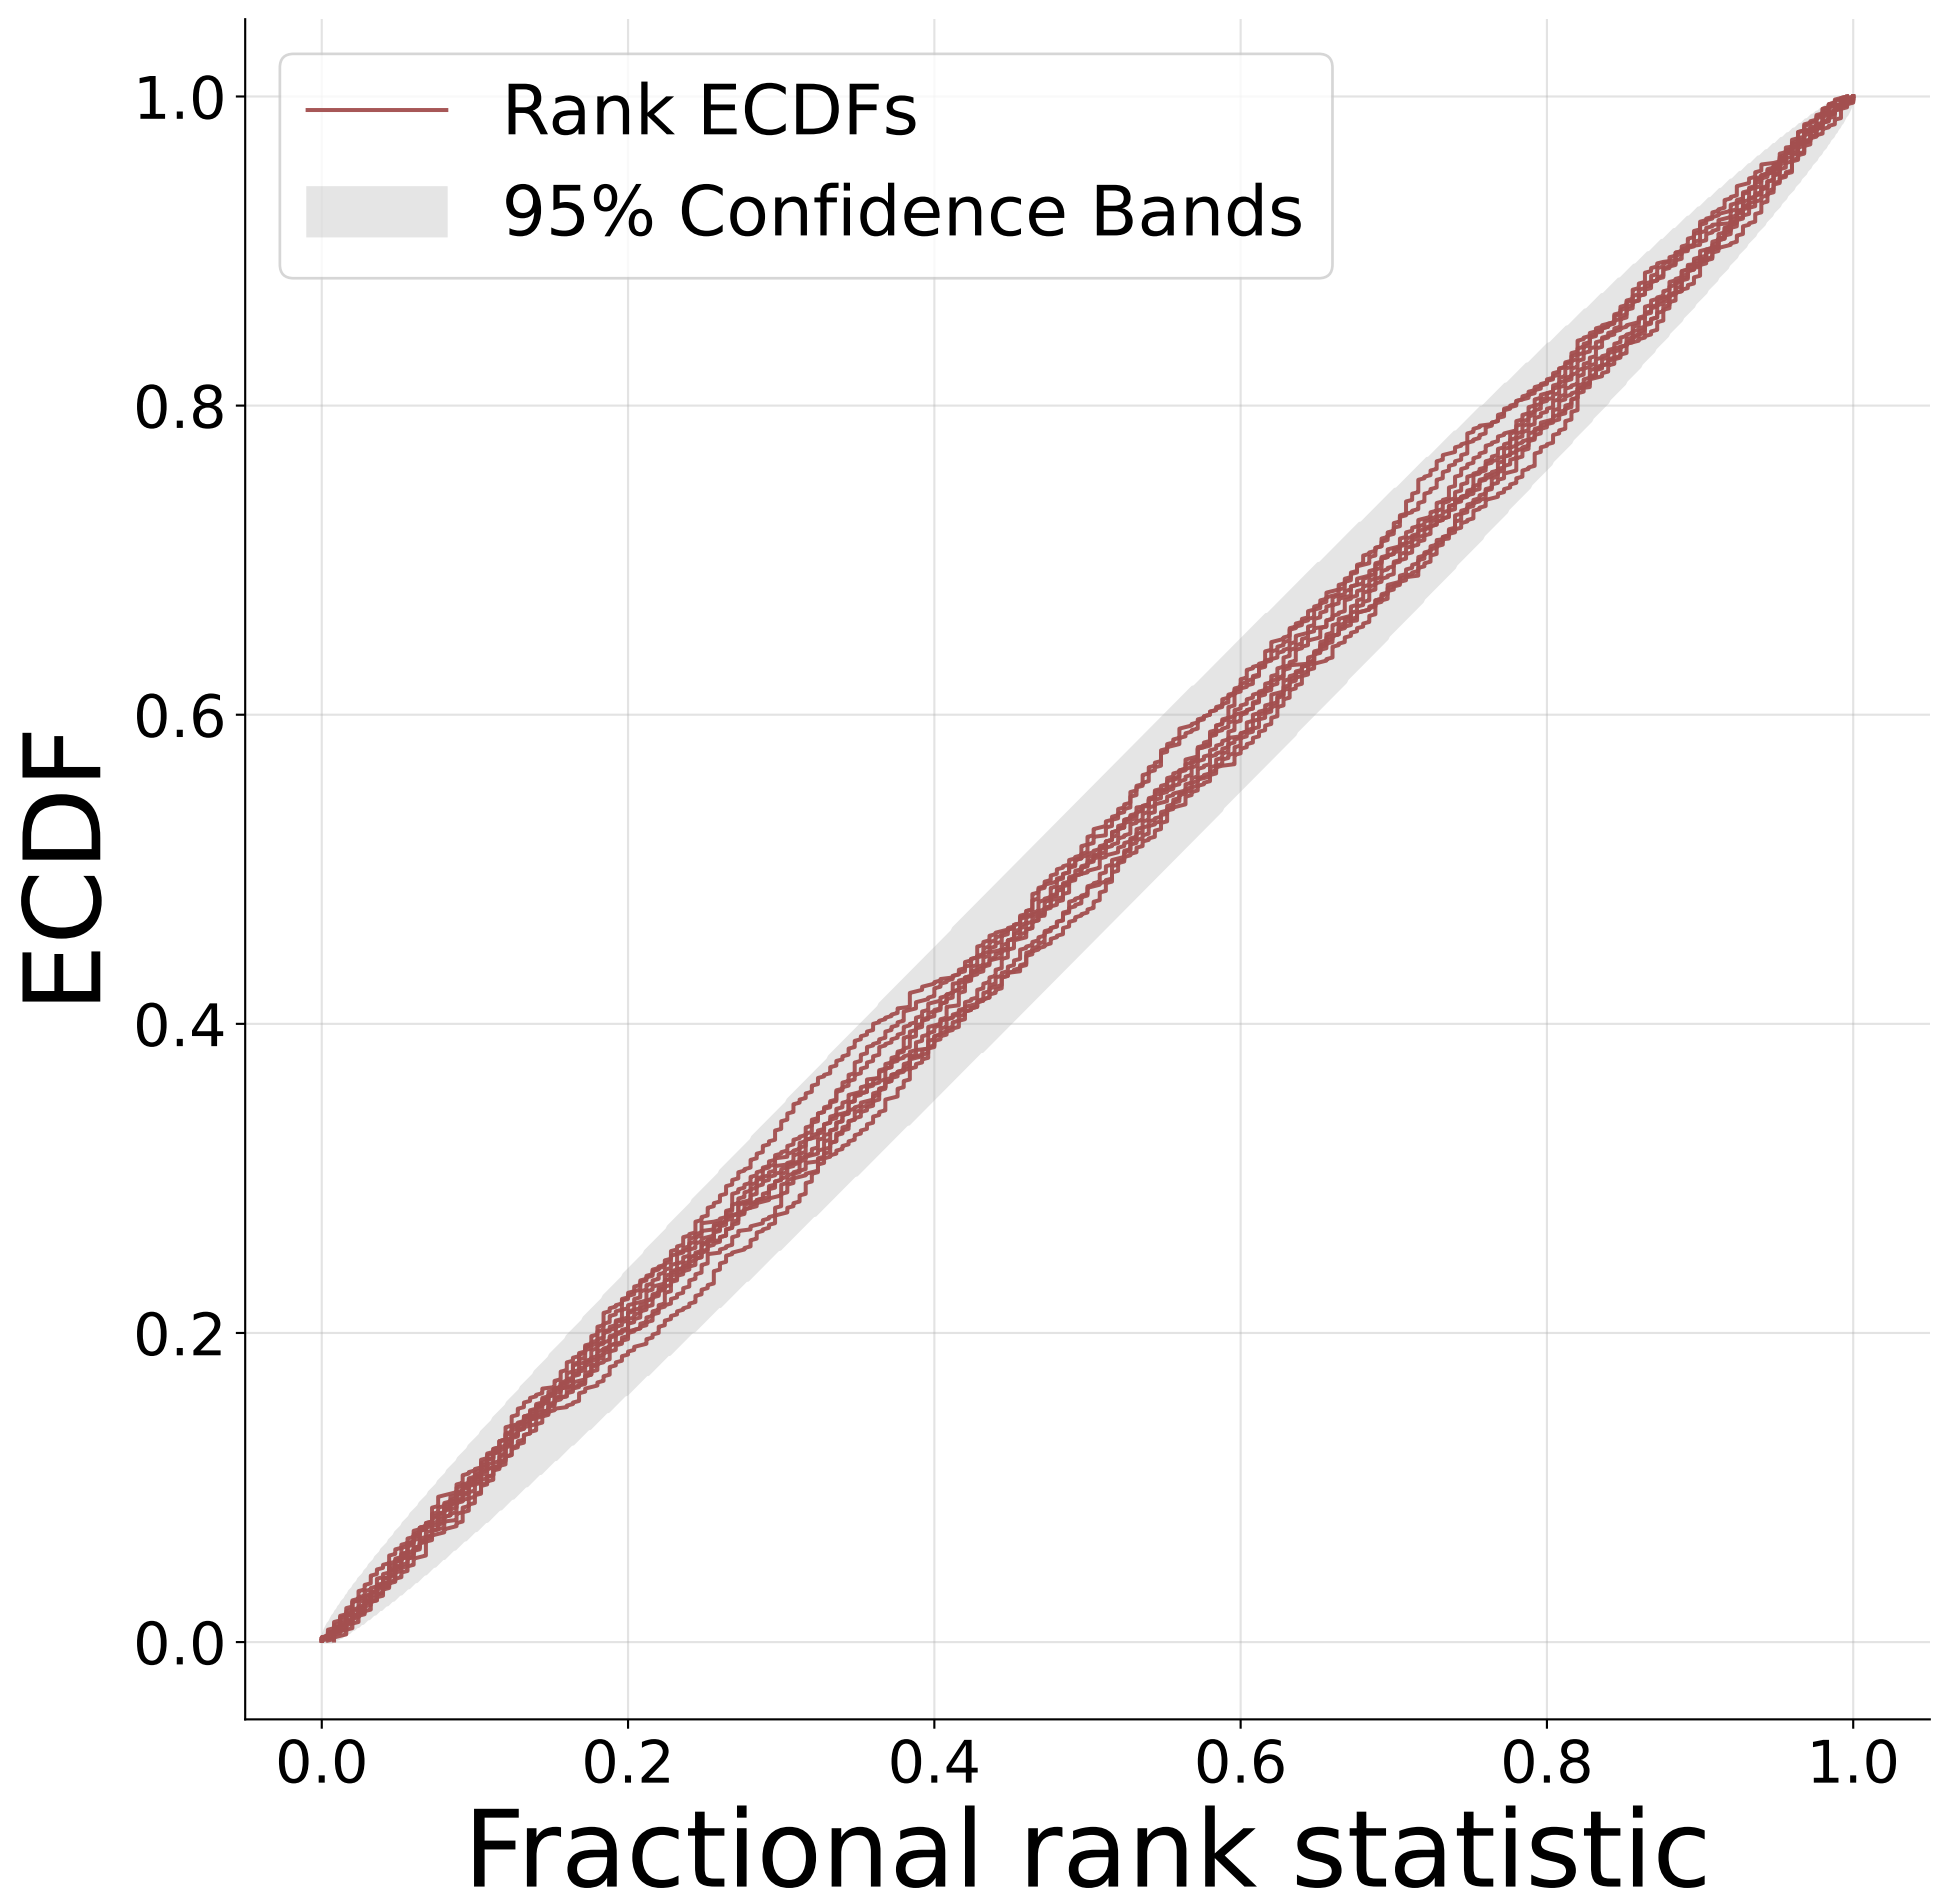

Supplement: supplementary_material [file attachment]

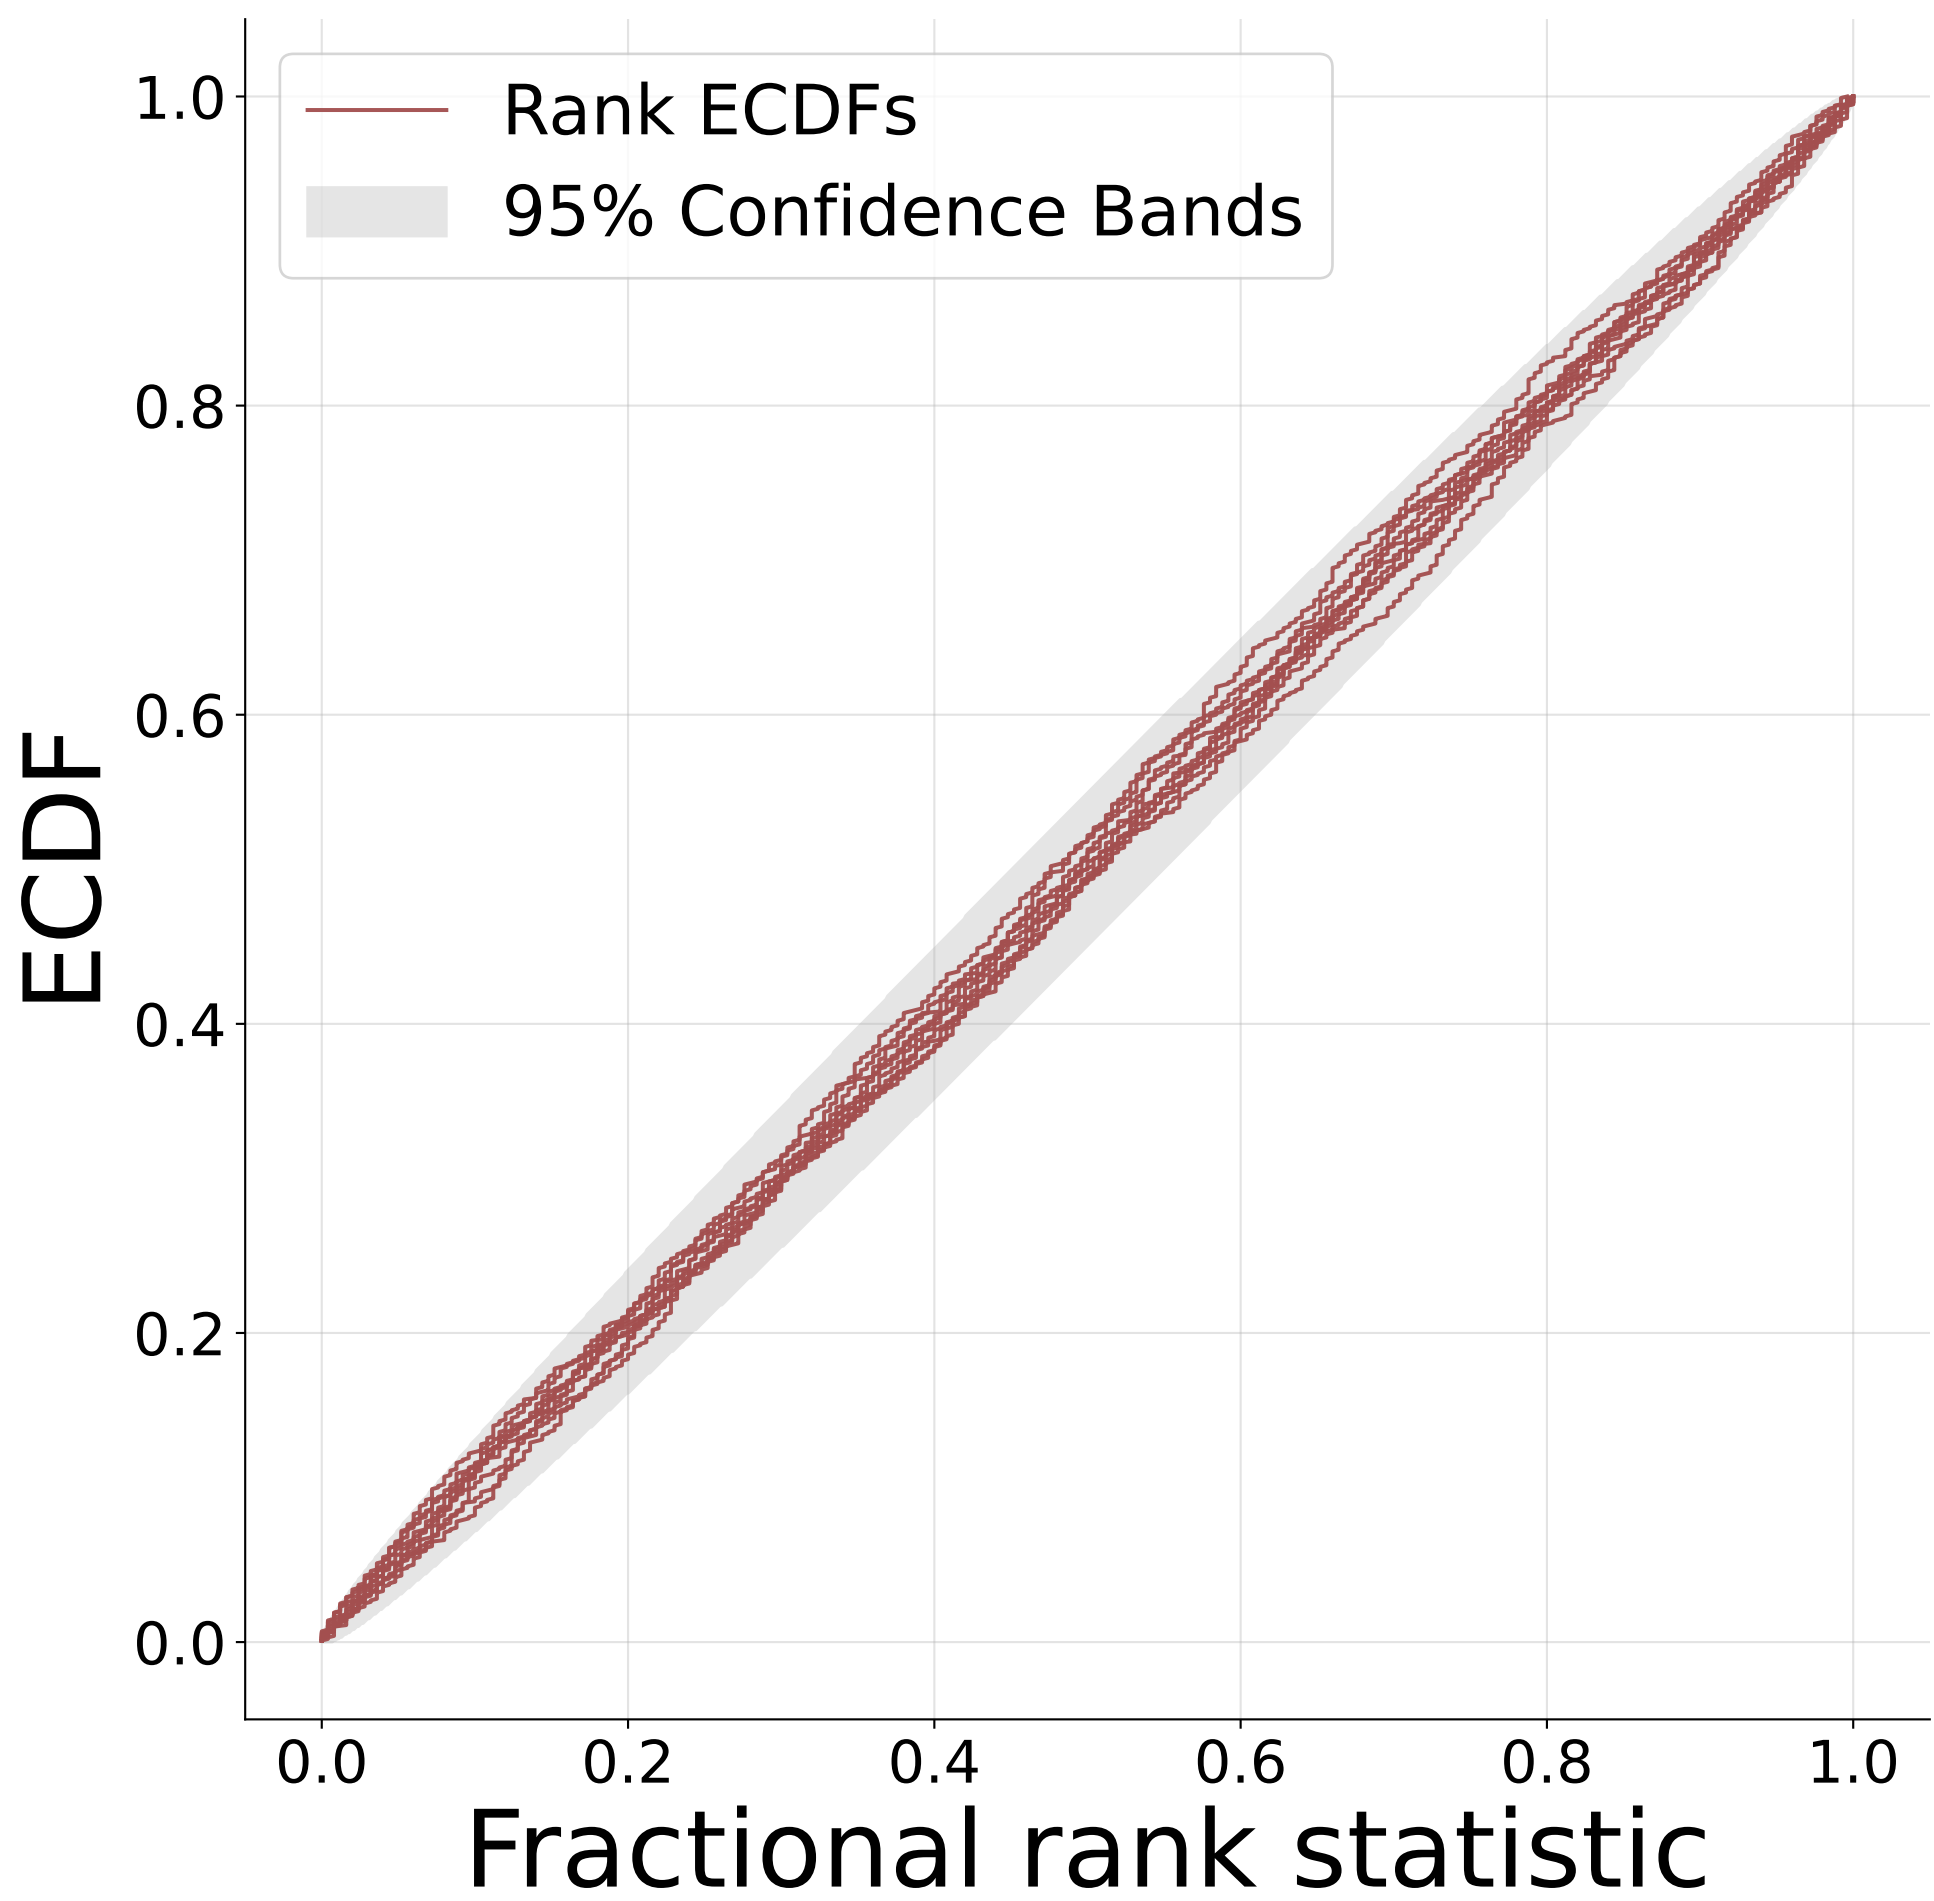

Supplement: supplementary_material [file attachment]

True



gSMC

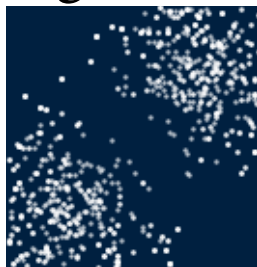

NPE-C

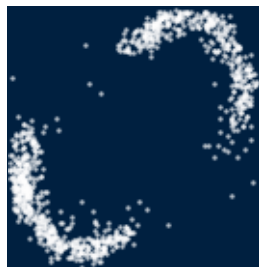

SNRE-B

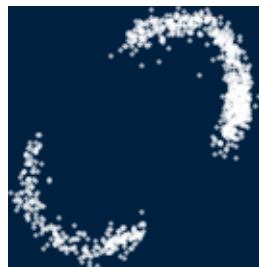

SNPE-C

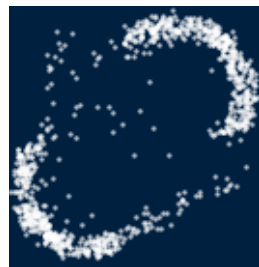

SNVI

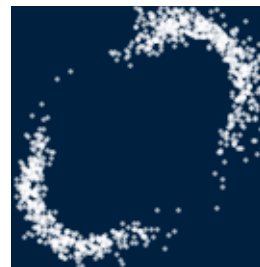

SNPLA

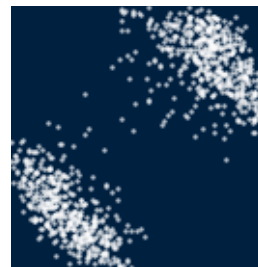

JANA

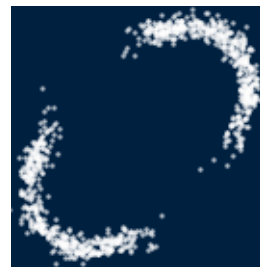 $N = 2000$ 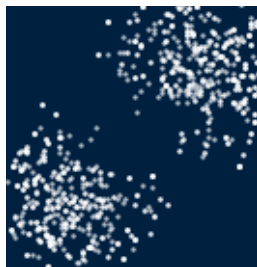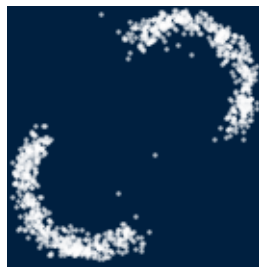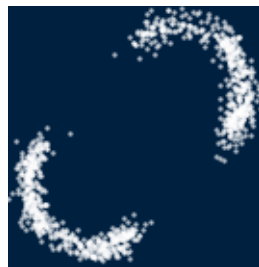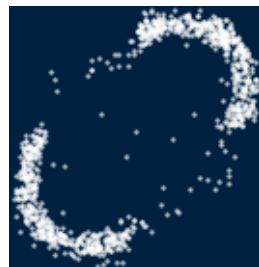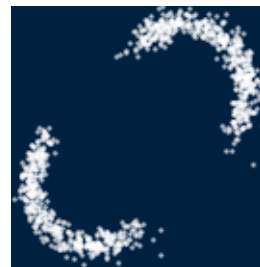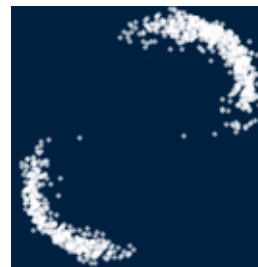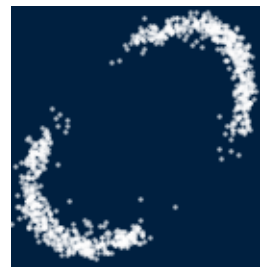 $N = 6000$ 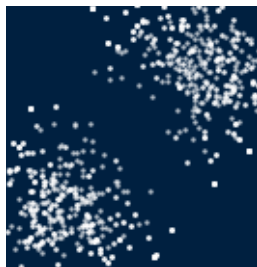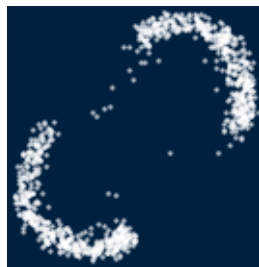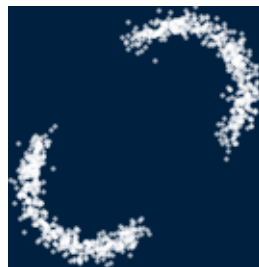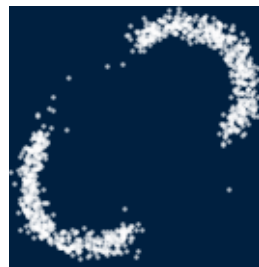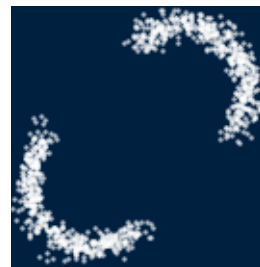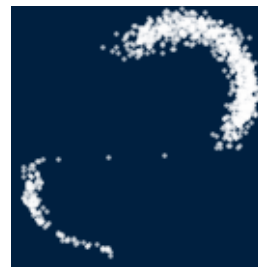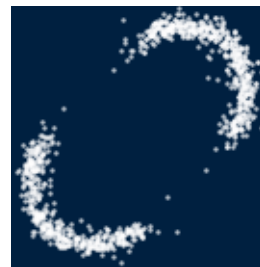 $N = 10000$

Supplement: supplementary_material [file attachment]

True

NPE-C

SNRE-B

SNPE-C

SNVI

SNPLA

JANA

 $N = 2000$ 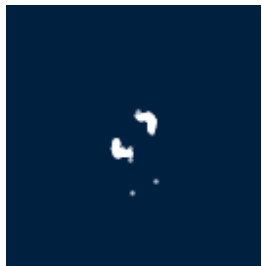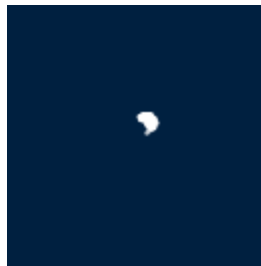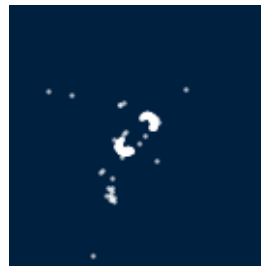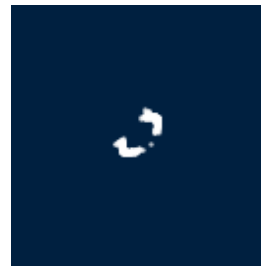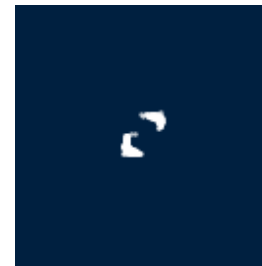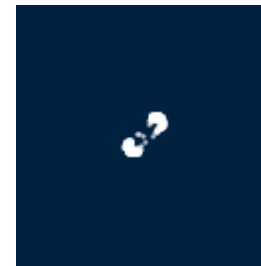 $N = 6000$ 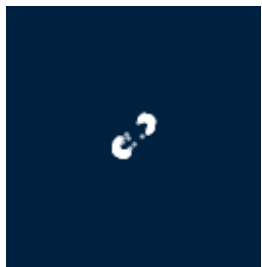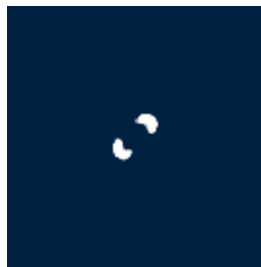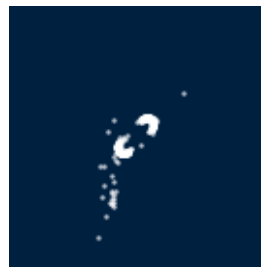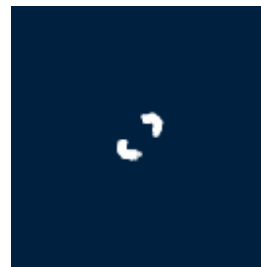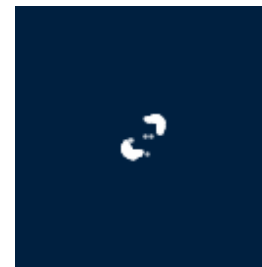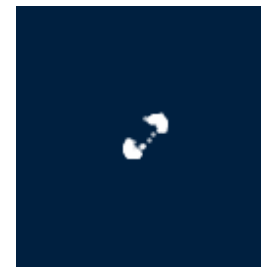 $N = 10000$

Supplement: supplementary_material [file attachment]

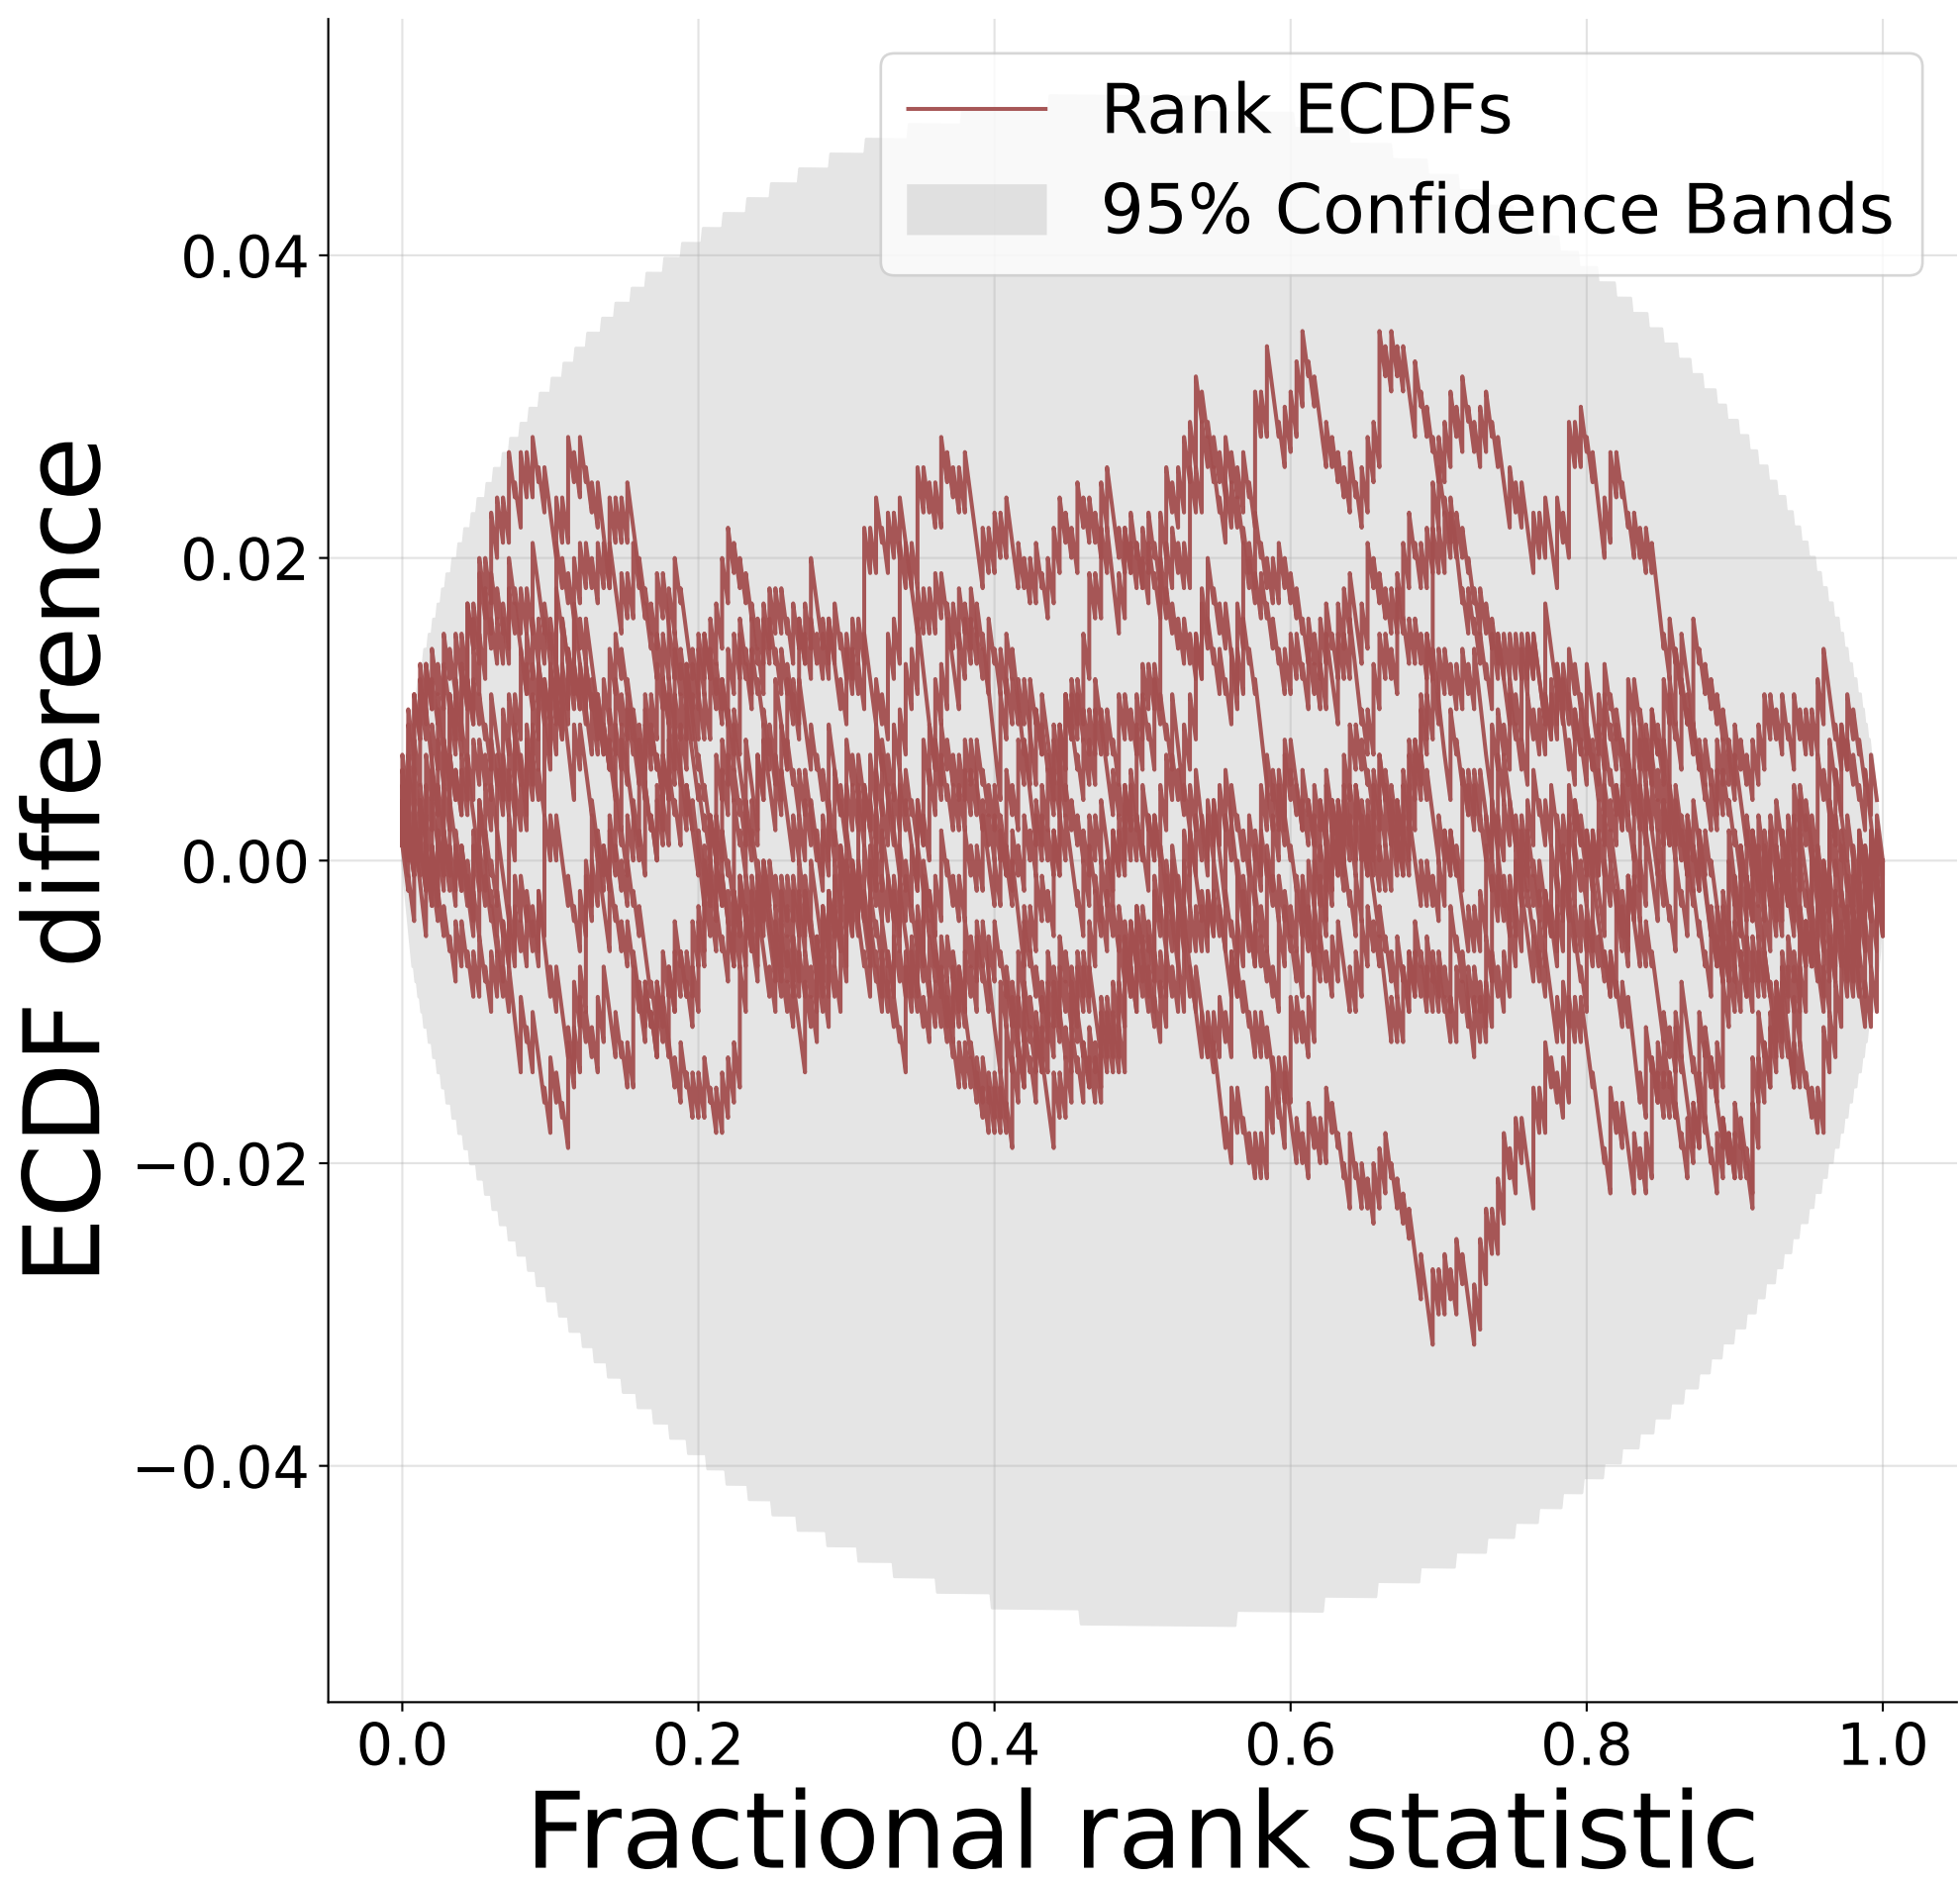

Supplement: supplementary_material [file attachment]

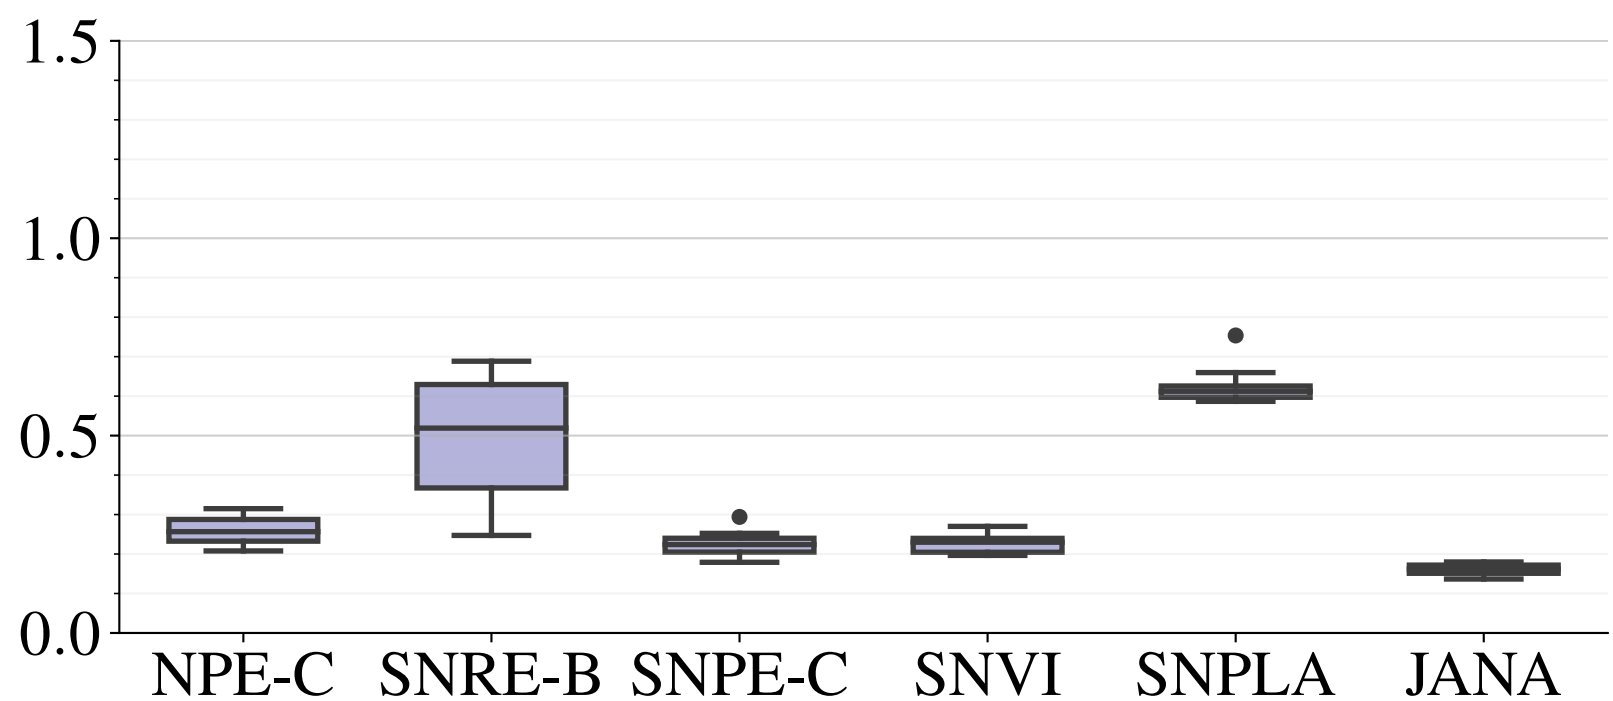

Supplement: supplementary_material [file attachment]

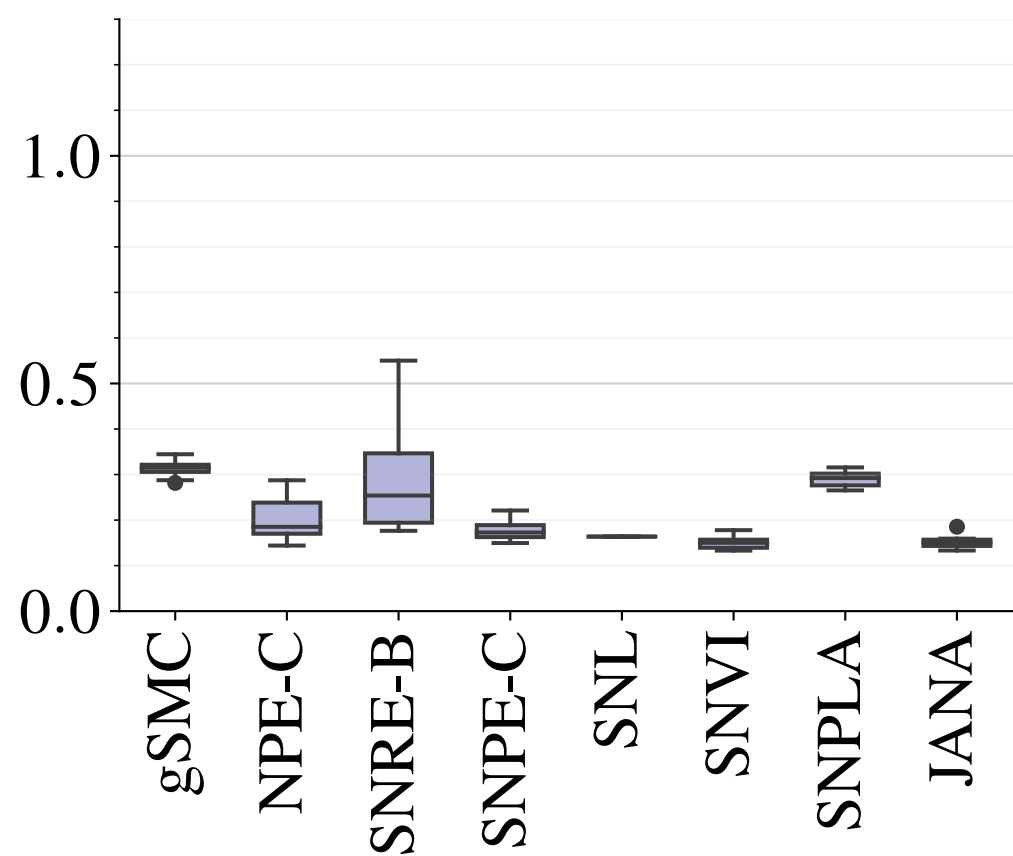

Supplement: supplementary_material [file attachment]

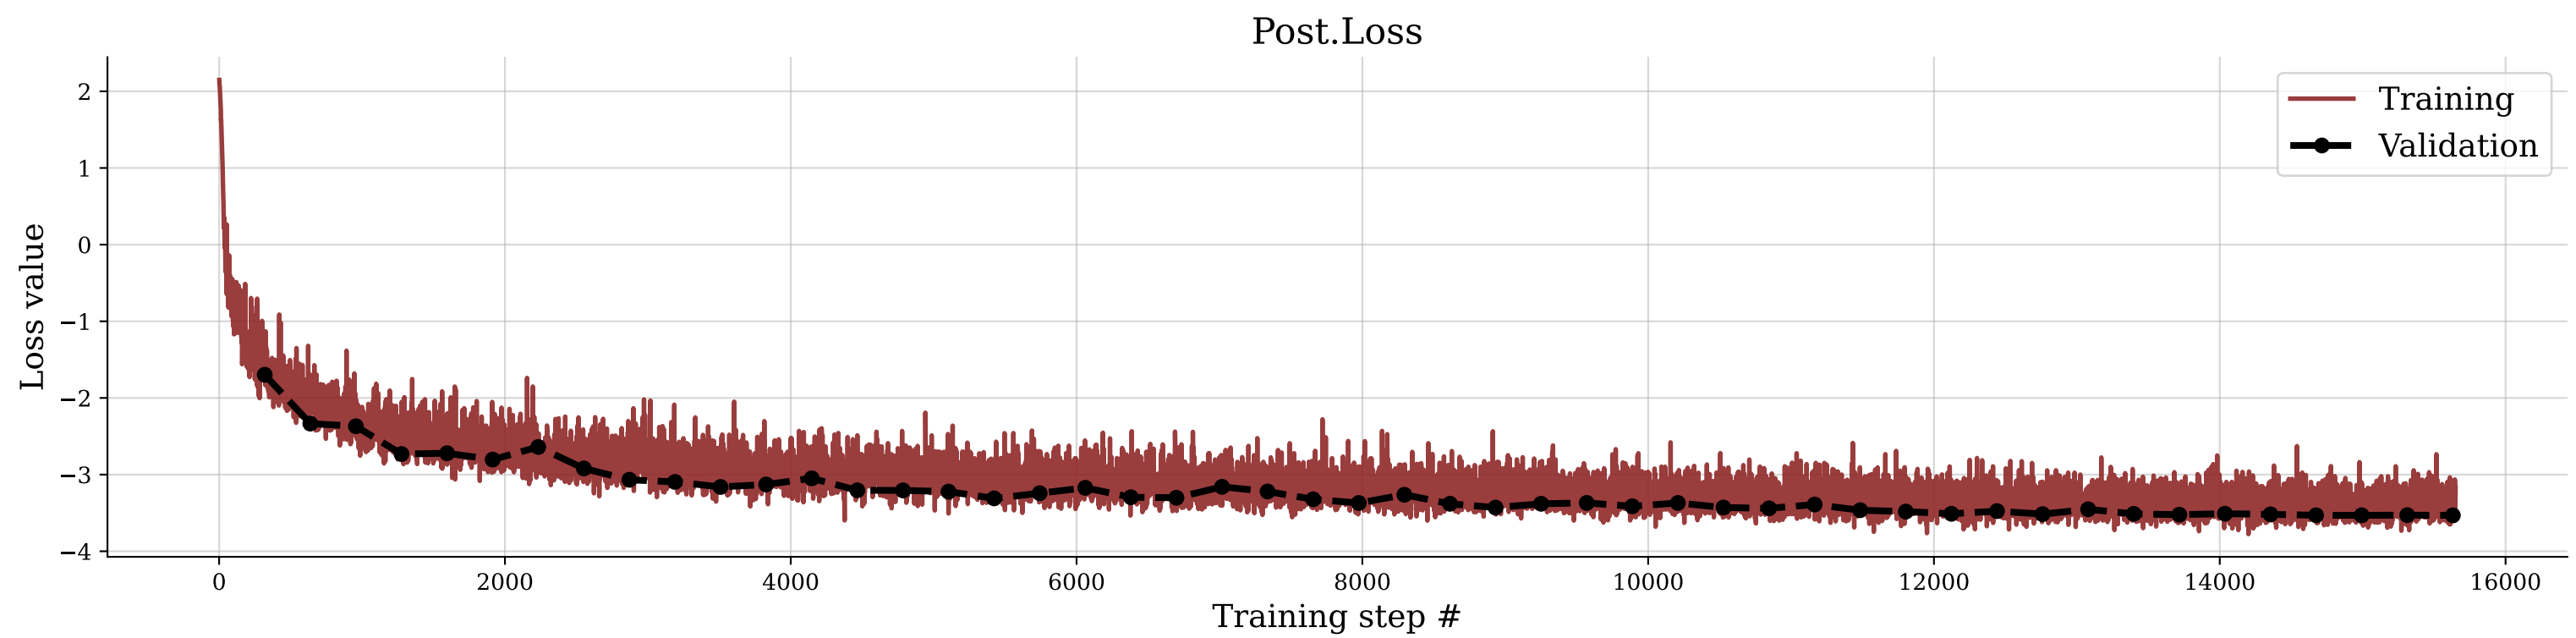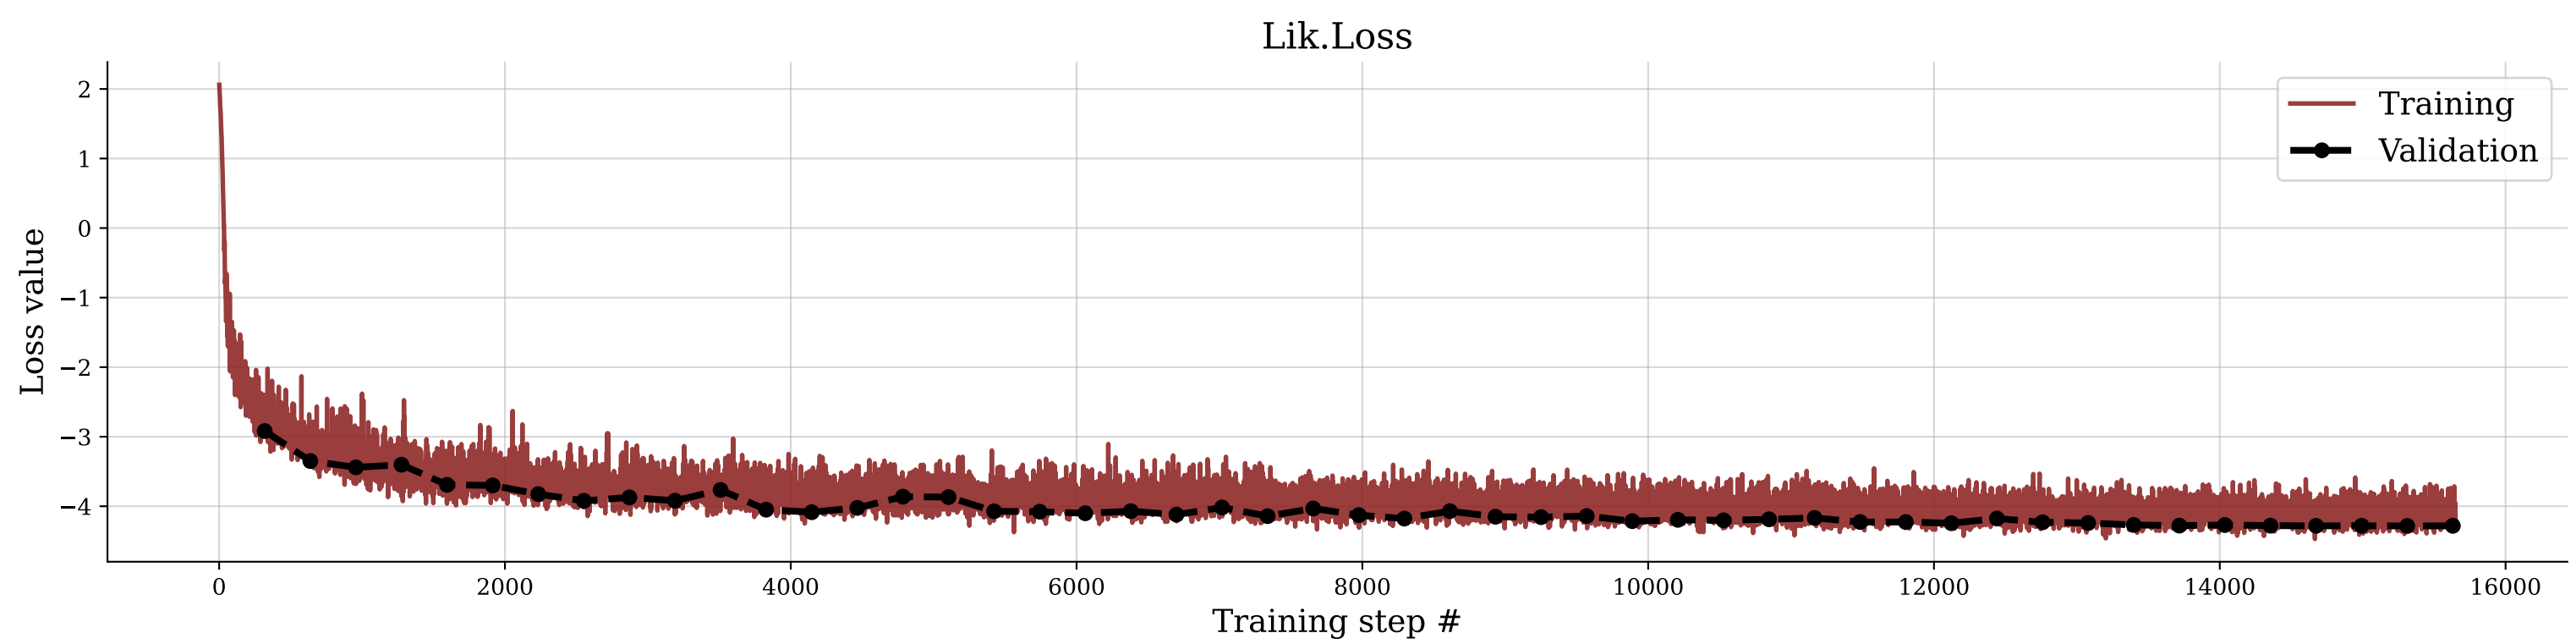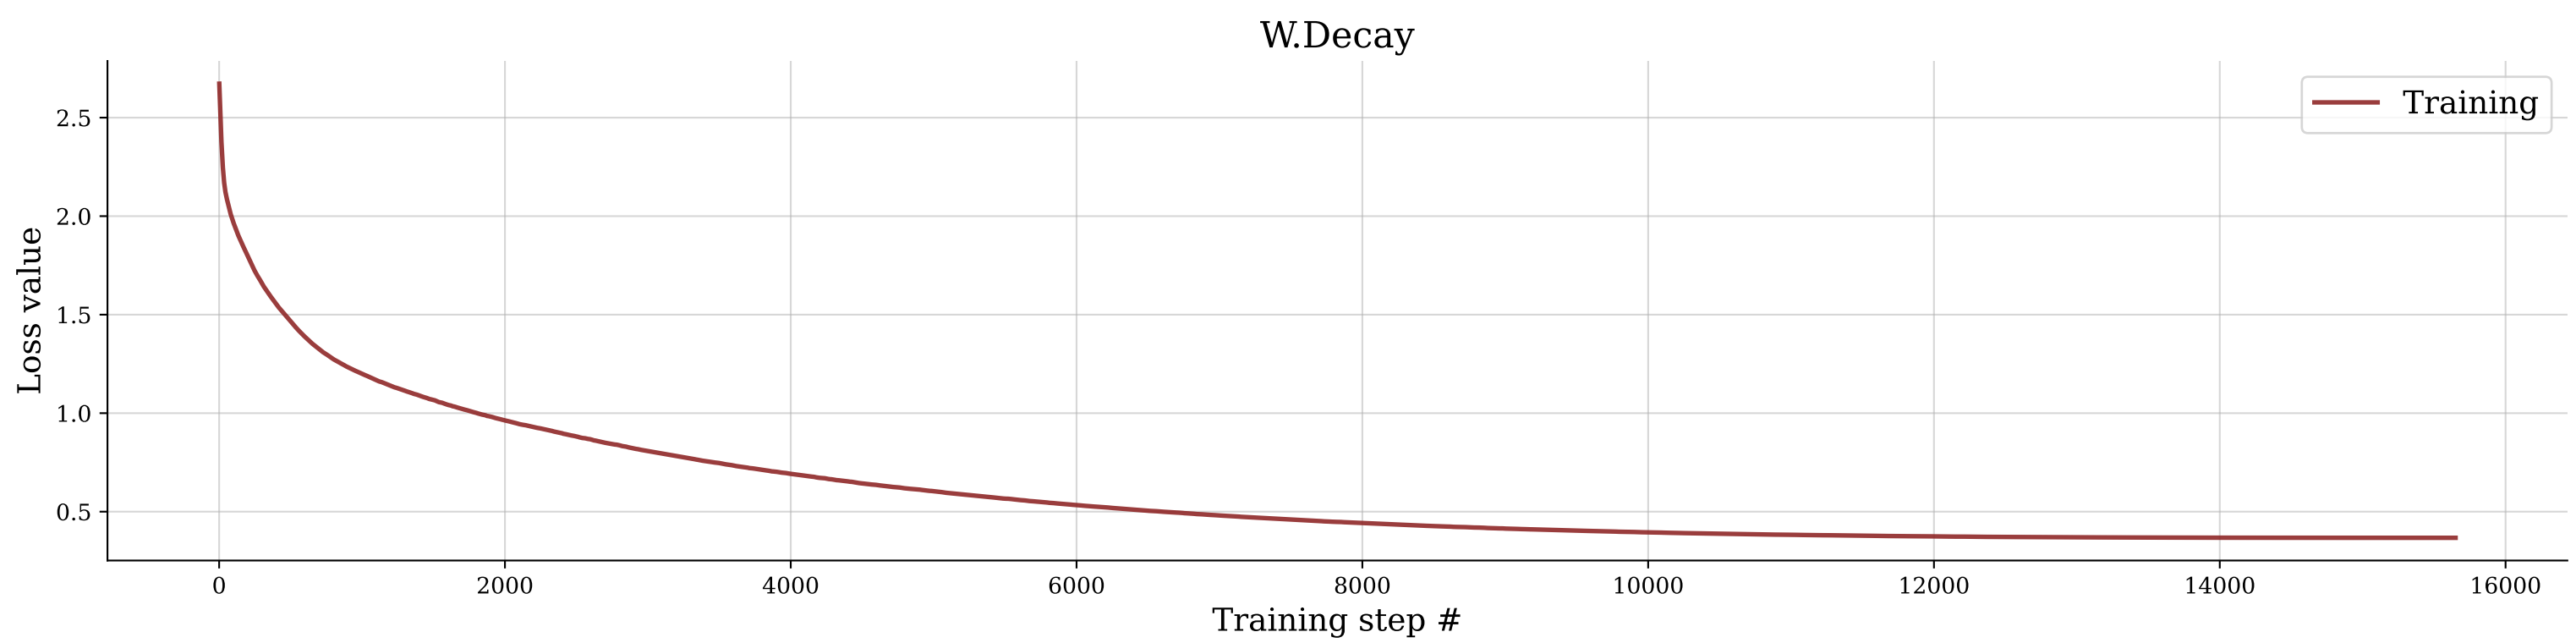

Supplement: supplementary_material [file attachment]

Likelihood density

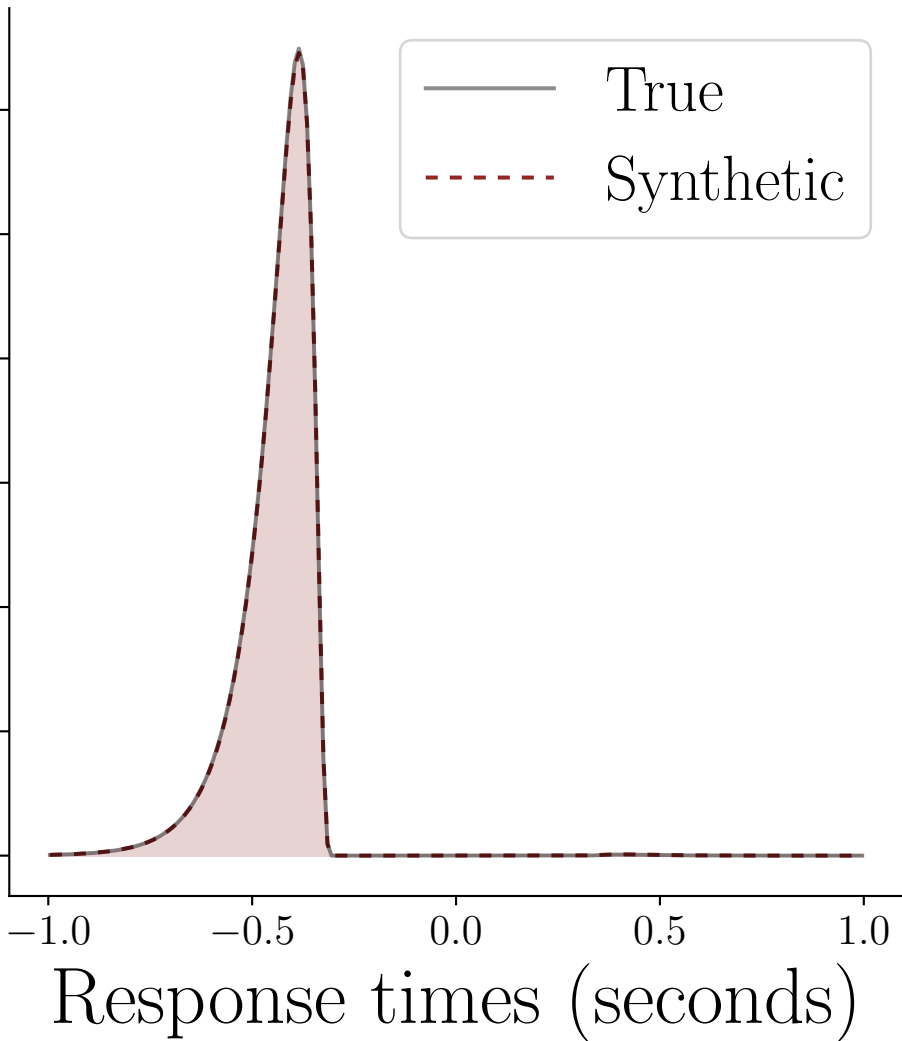

Supplement: supplementary_material [file attachment]

JANA

$$R^2 = 0.998$$

$$r = 1.000$$

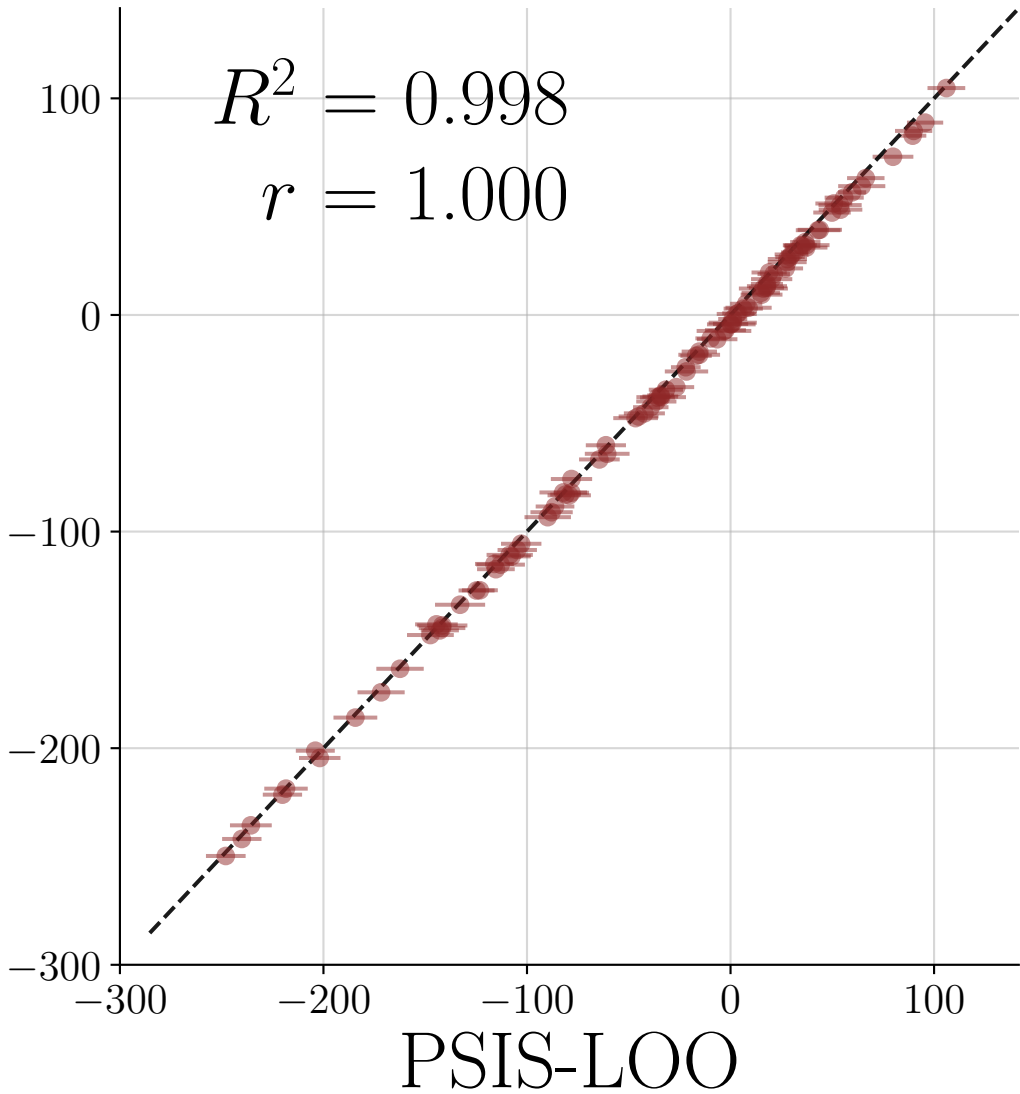

Supplement: supplementary_material [file attachment]

ECDF difference

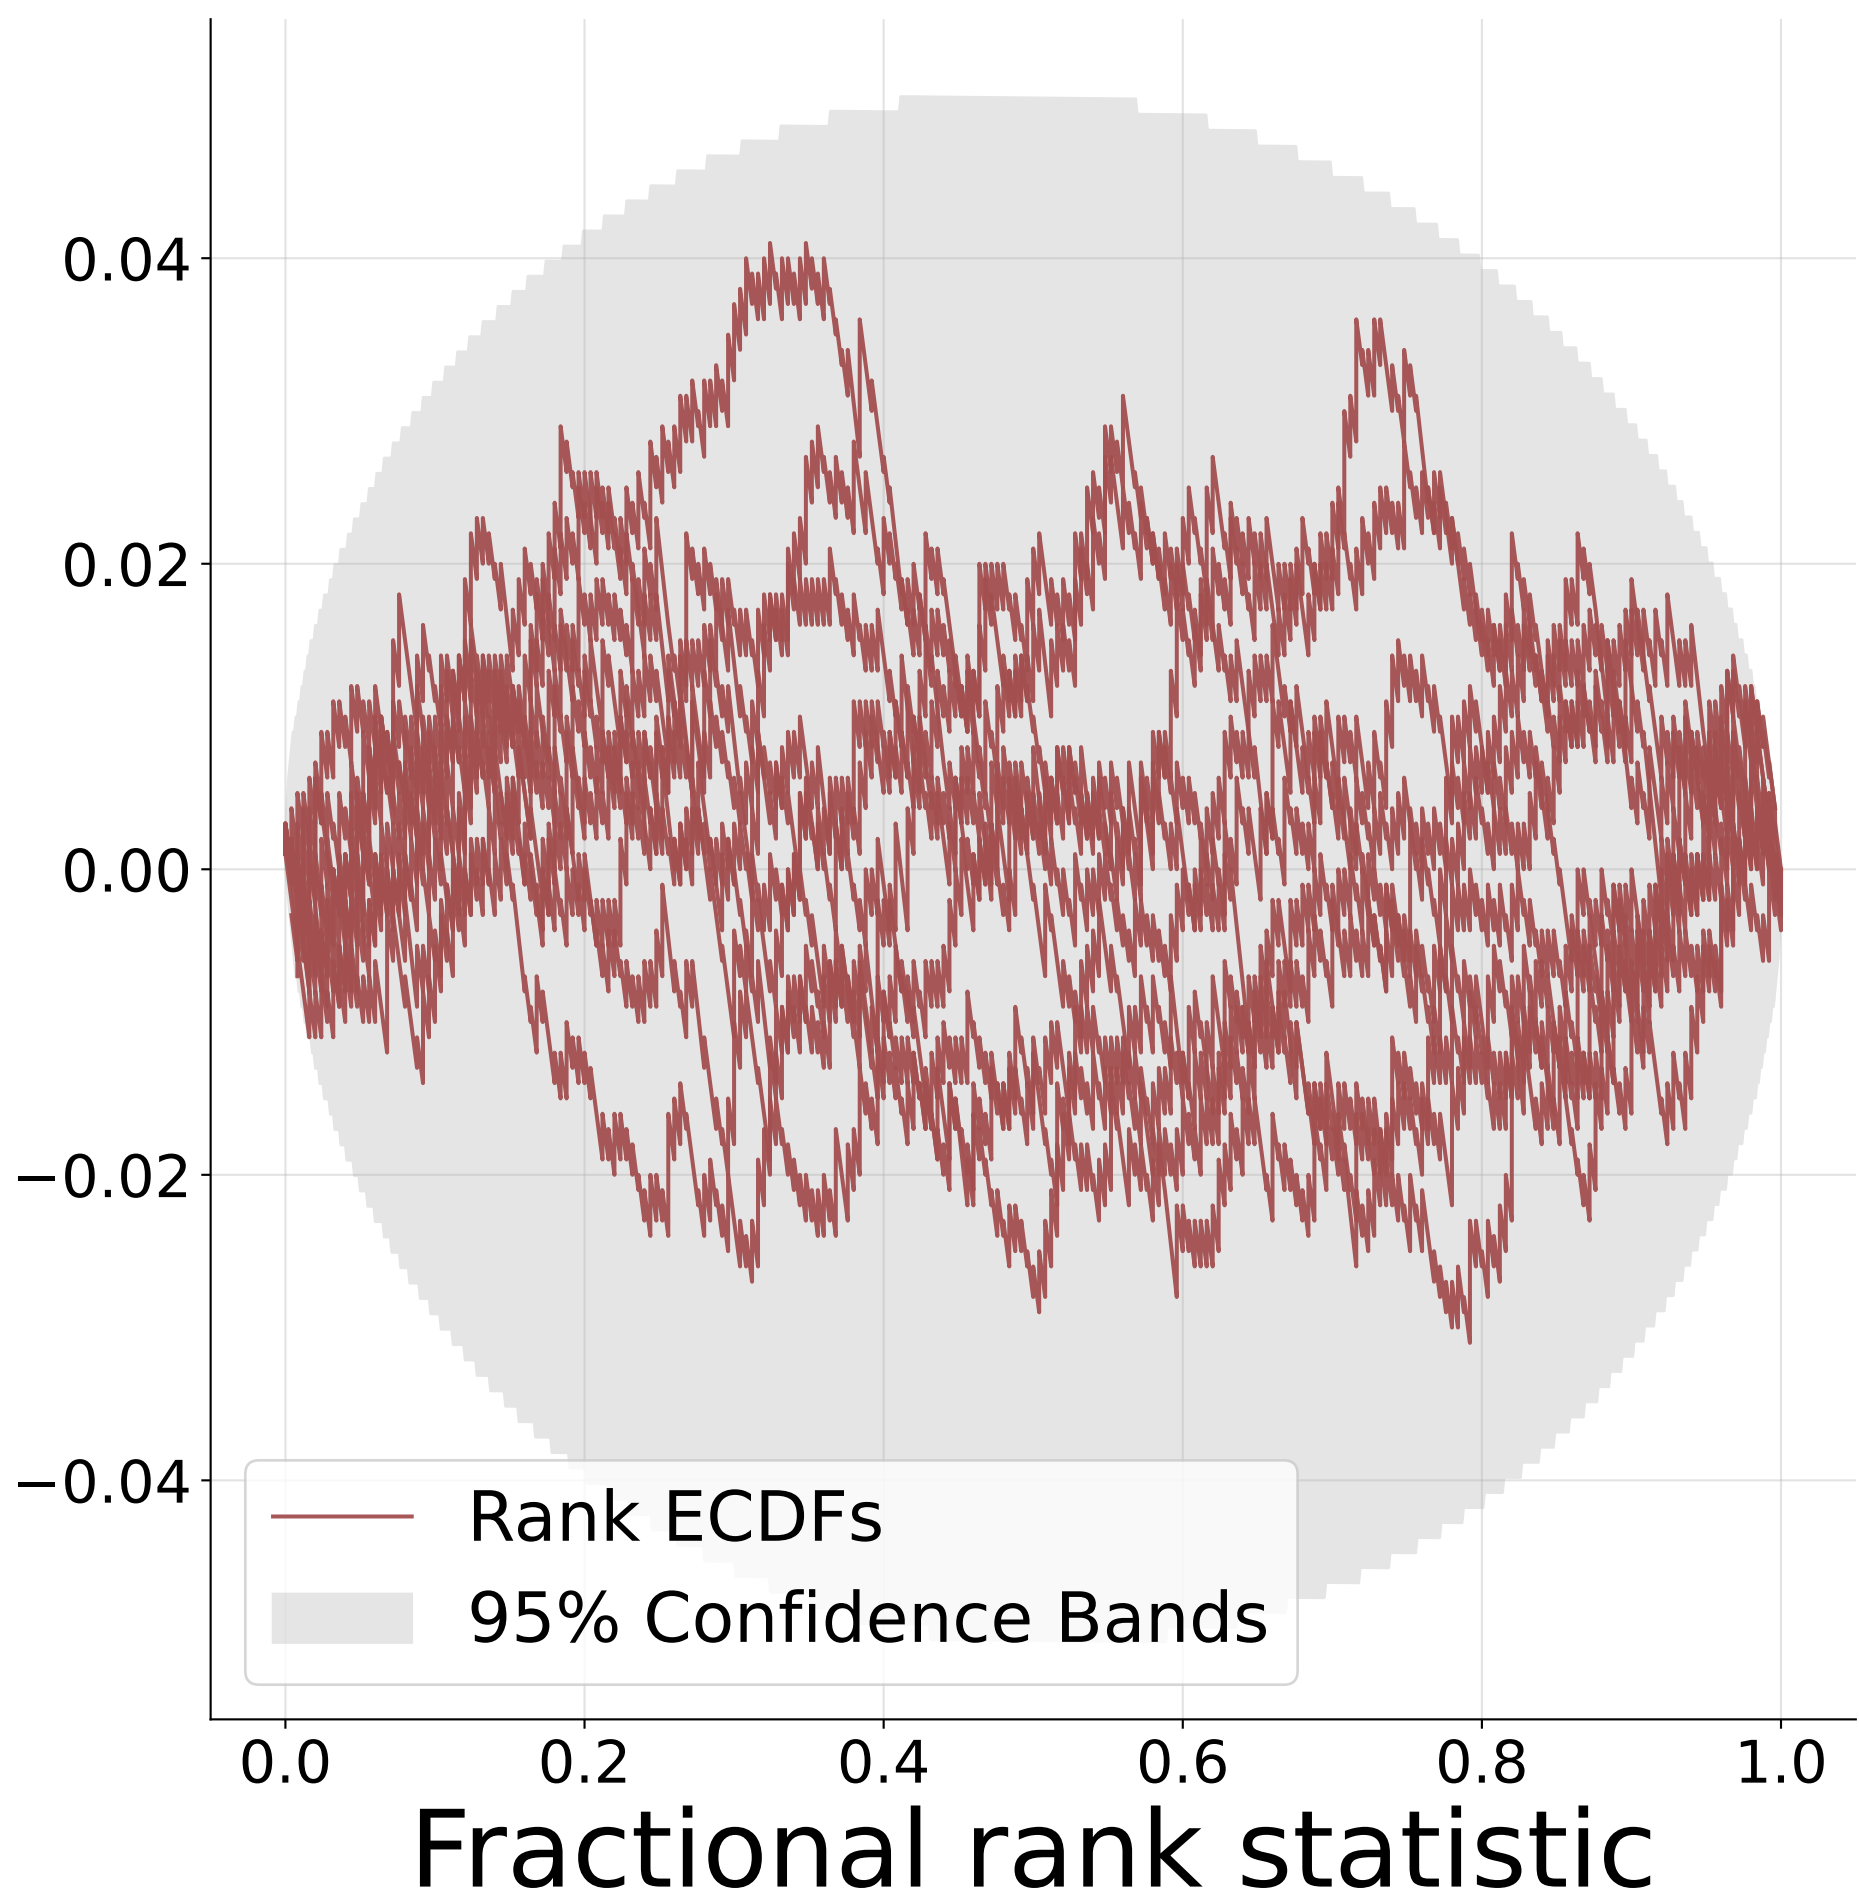

Supplement: supplementary_material [file attachment]
