# Supplementary material (part 2 of 2)
Source: ML conference proceedings conference paper supplement (https://openreview.net/forum?id=dS3wVICQrU0)

ECDF difference

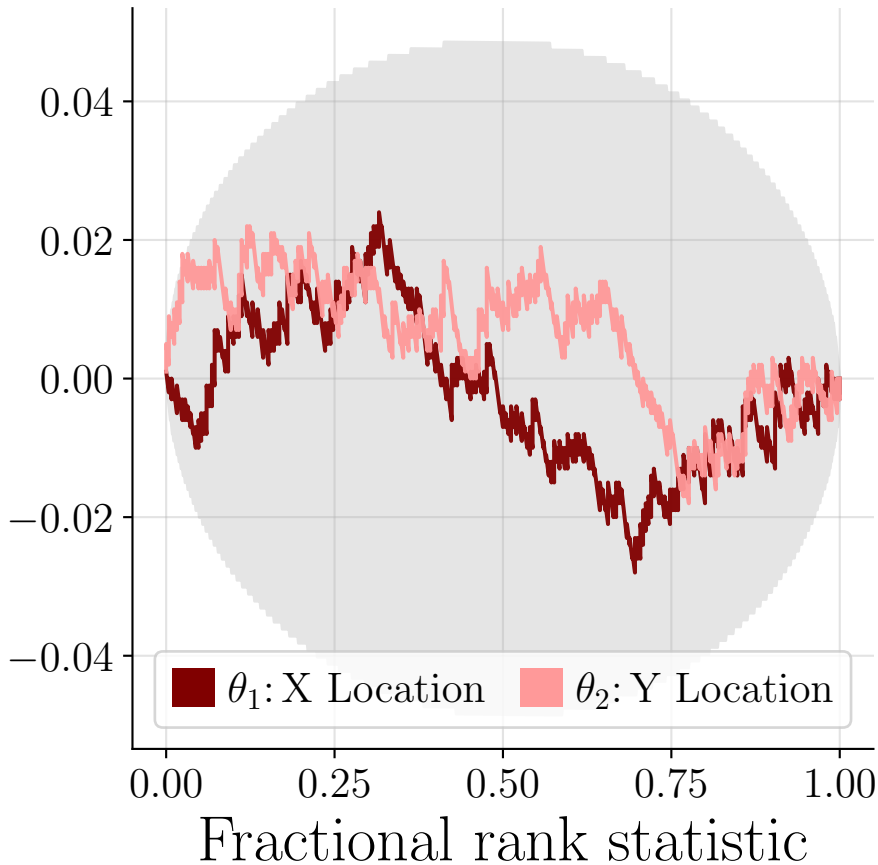

Supplement: supplementary_material [file attachment]

ECDF difference

$\alpha$

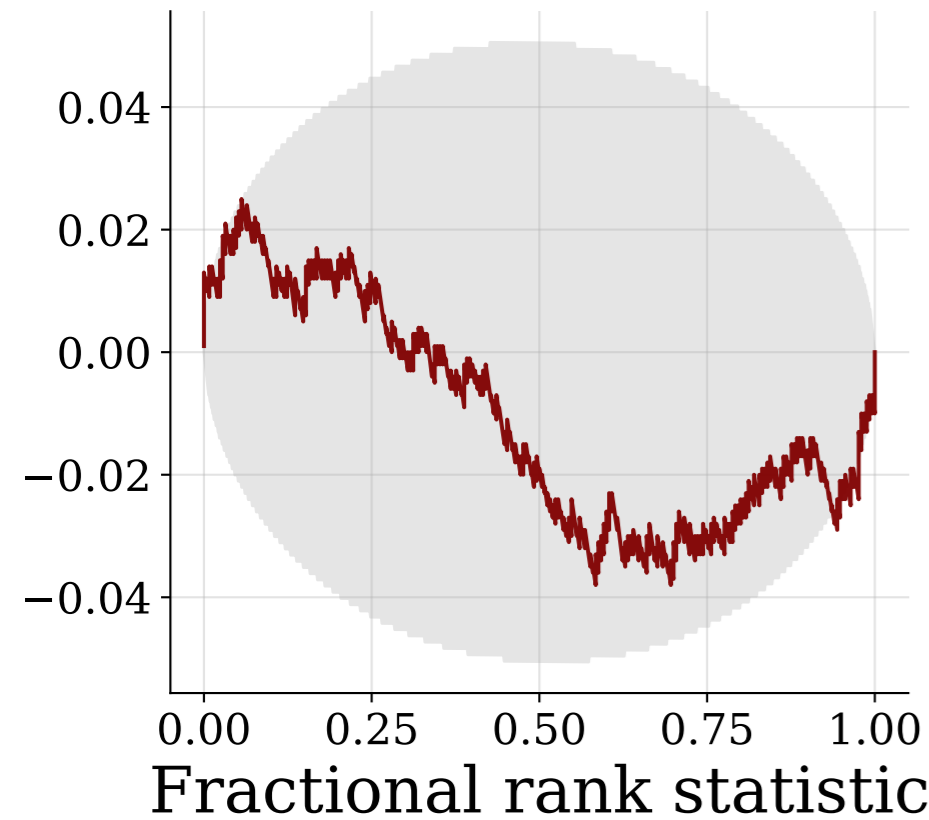

$\beta$

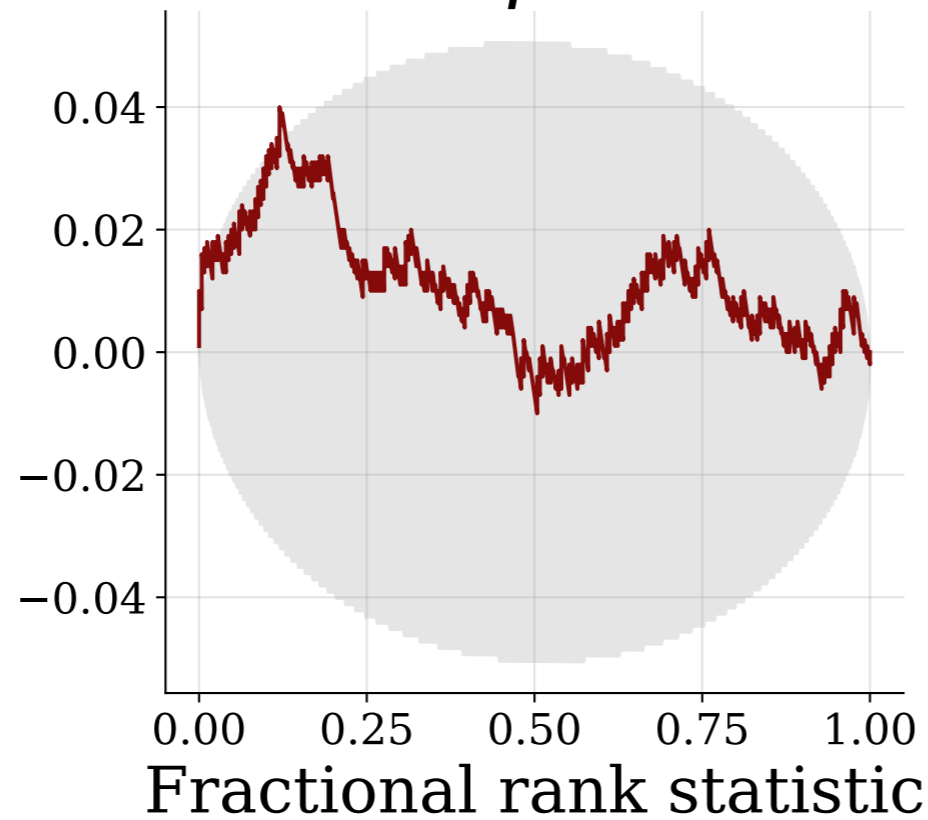

$\gamma$

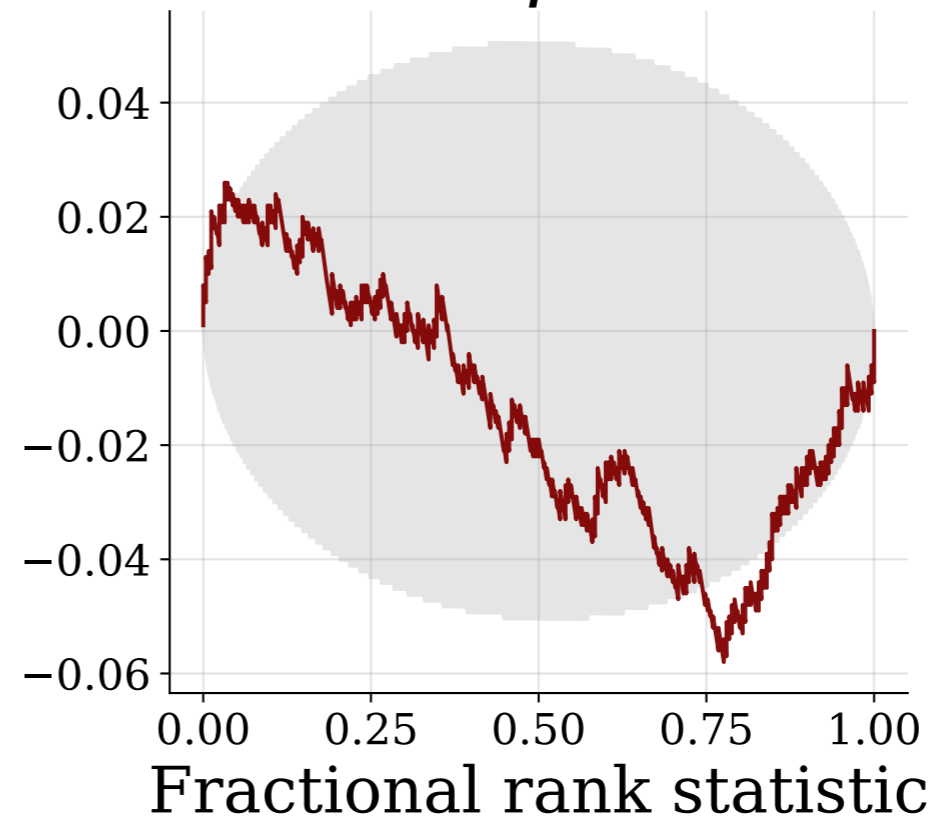

$\delta$

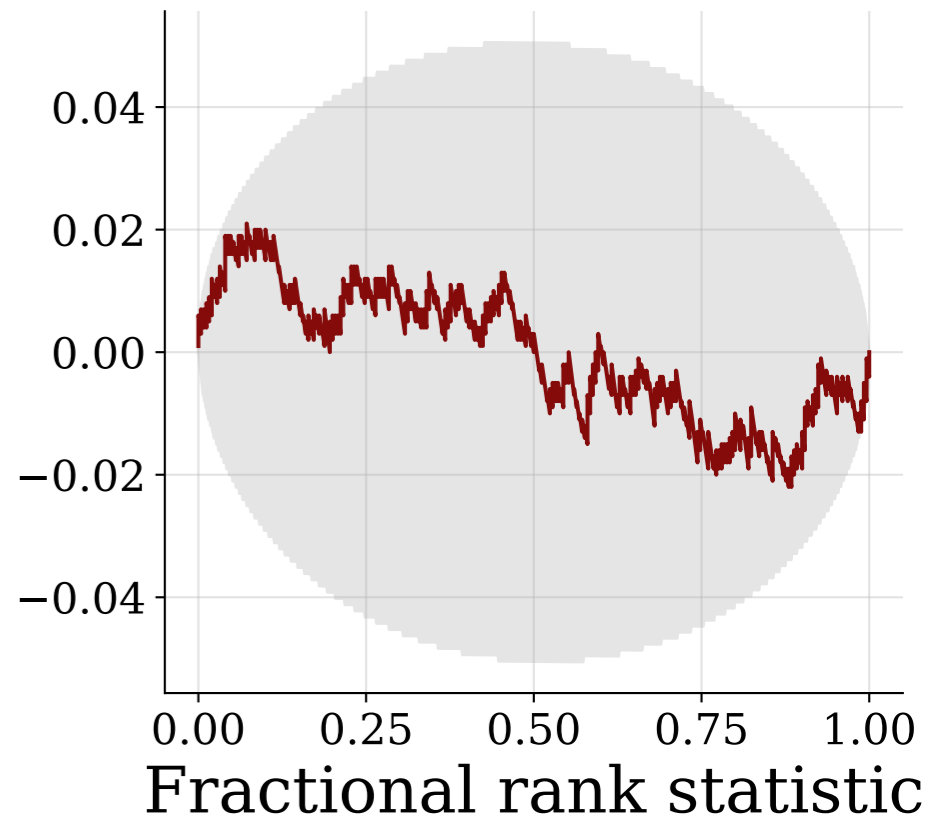

Supplement: supplementary_material [file attachment]

True

NPE-C

SNRE-B

SNPE-C

SNVI

SNPLA

JANA

 $N = 2000$  $N = 6000$  $N = 10000$ 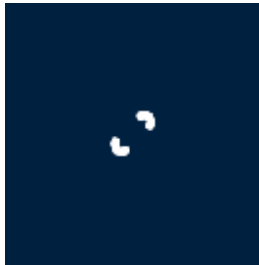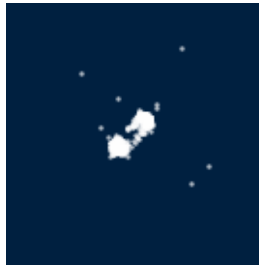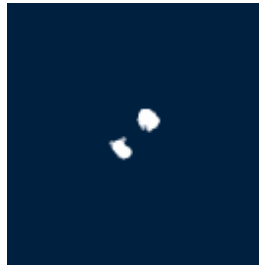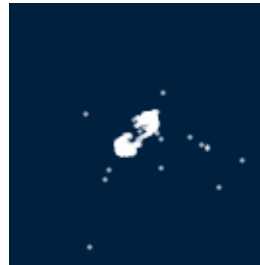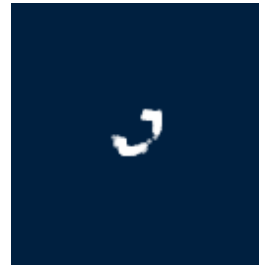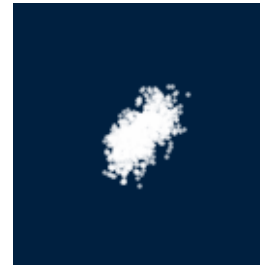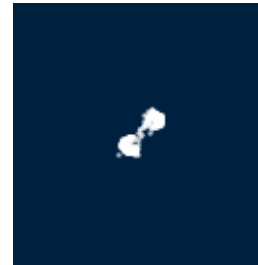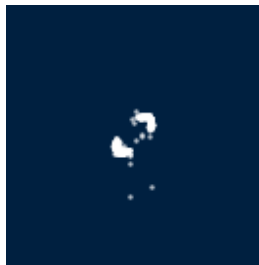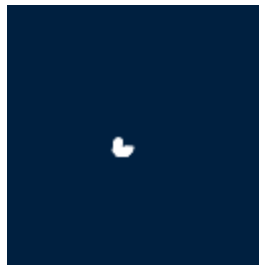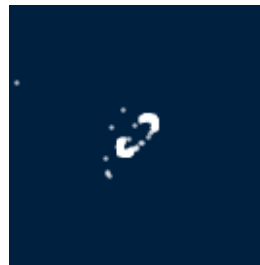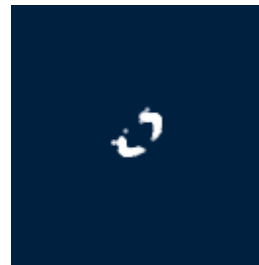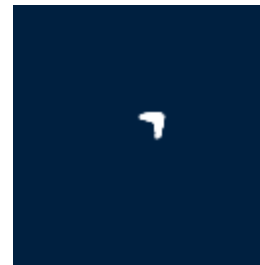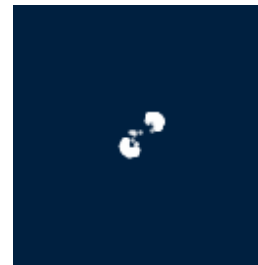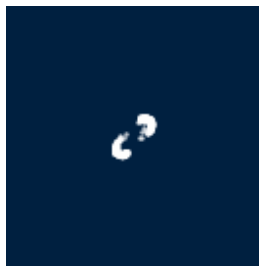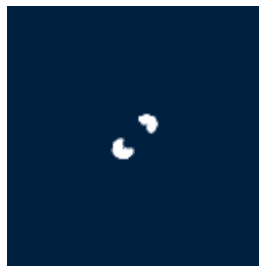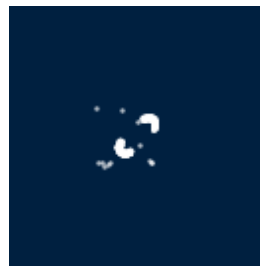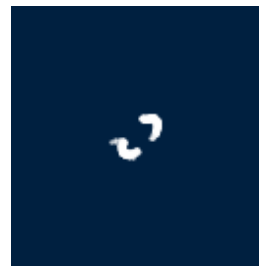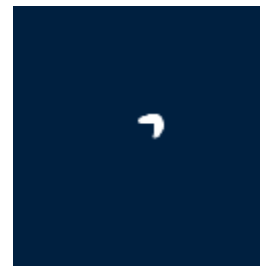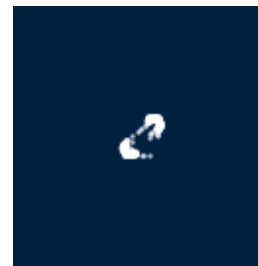

Supplement: supplementary_material [file attachment]

Surrogate

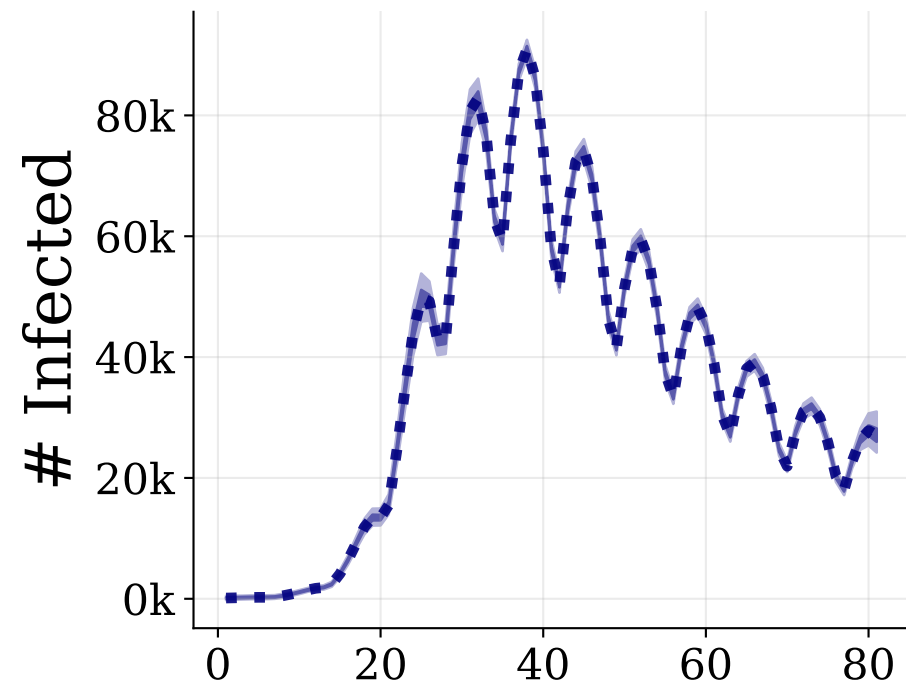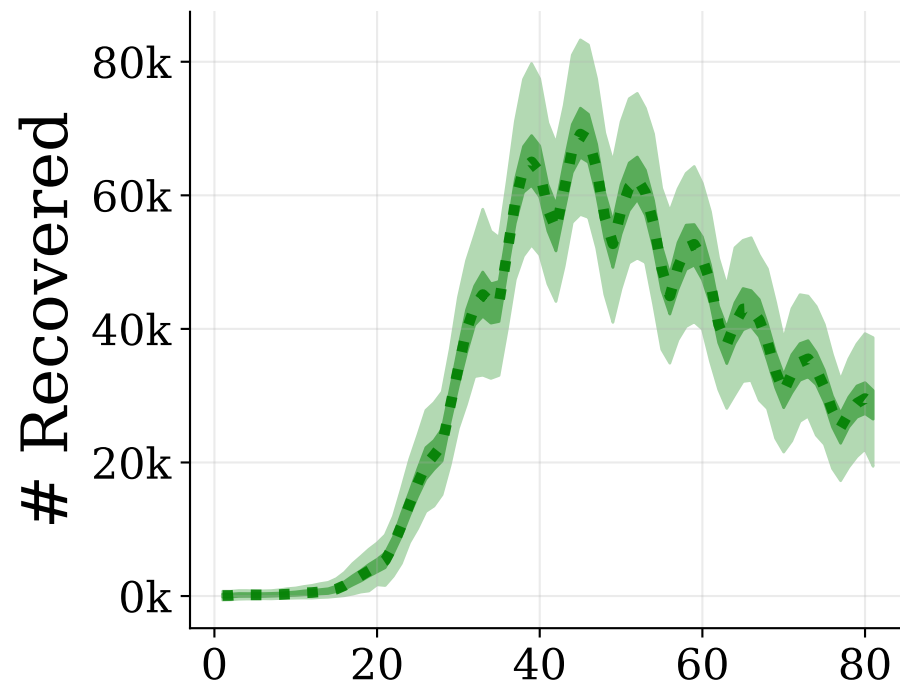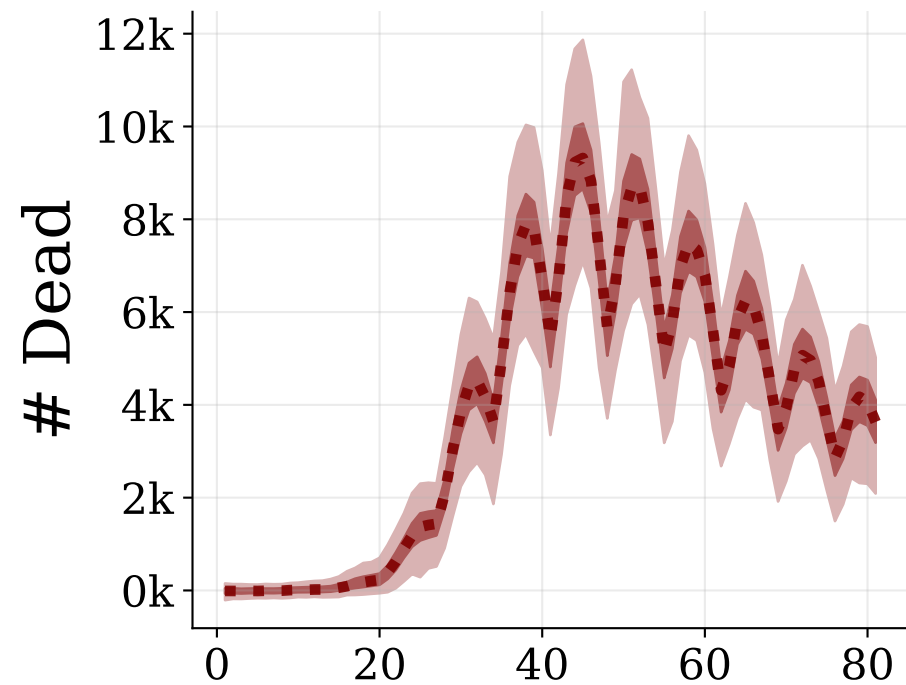

Simulator

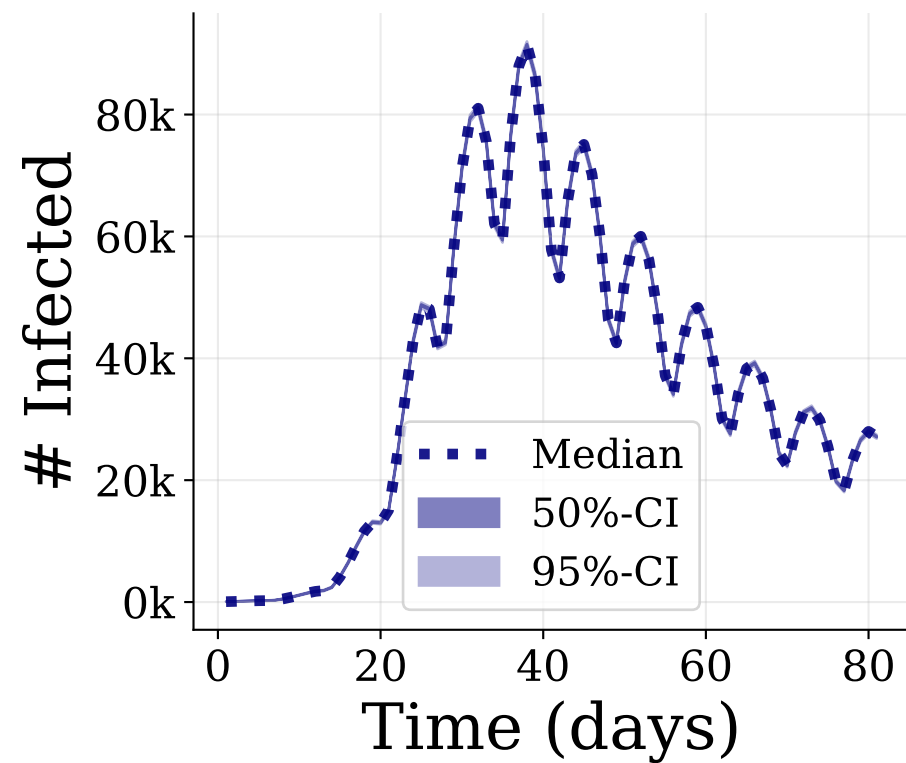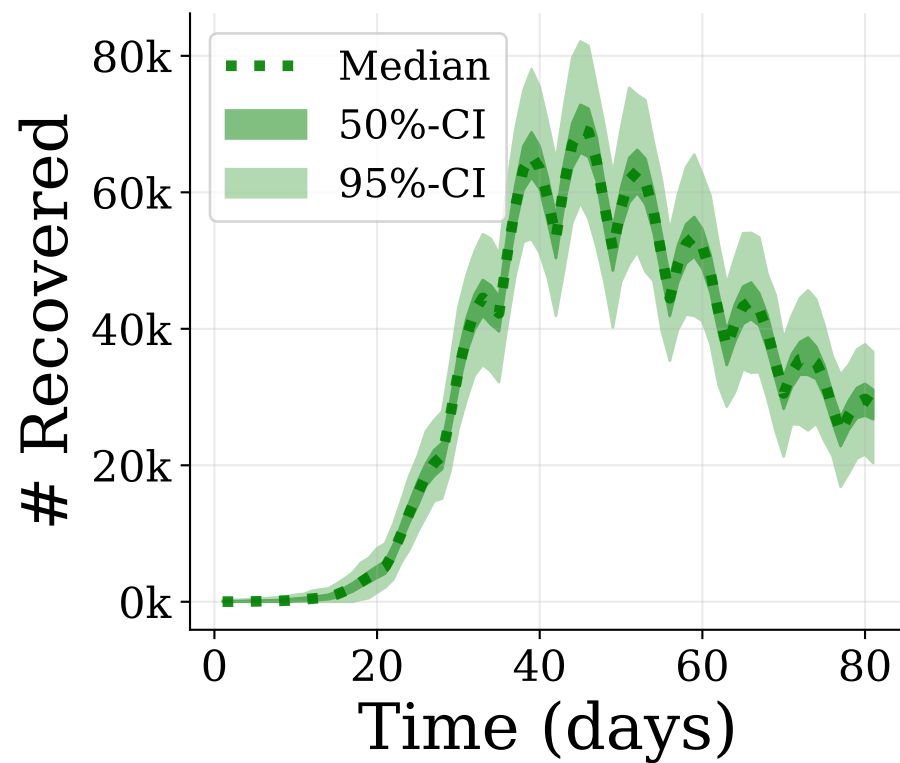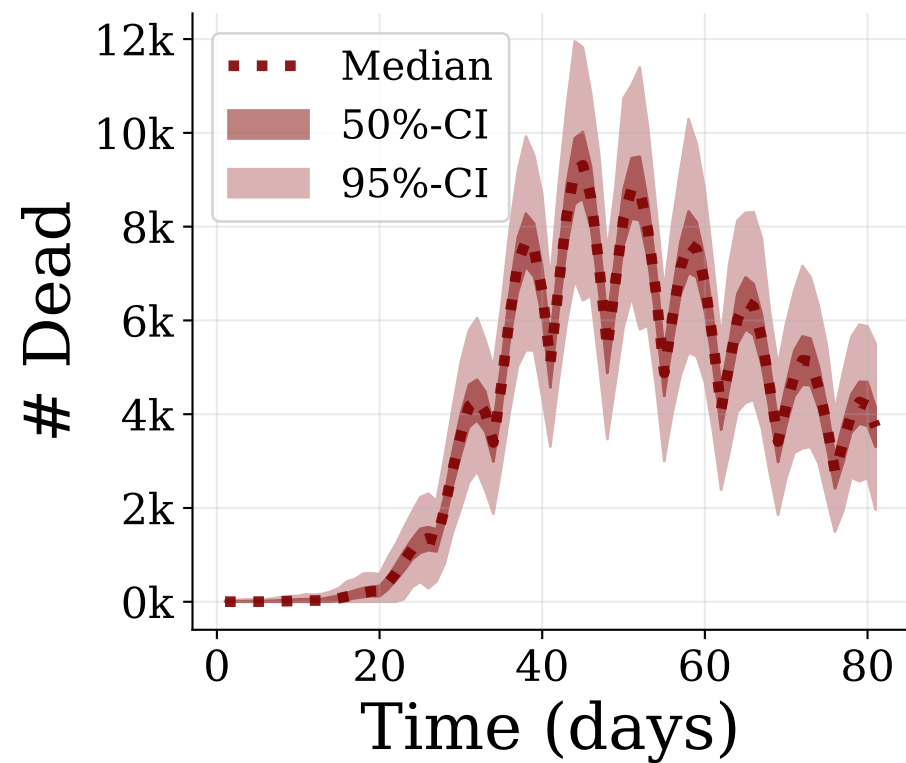

Supplement: supplementary_material [file attachment]

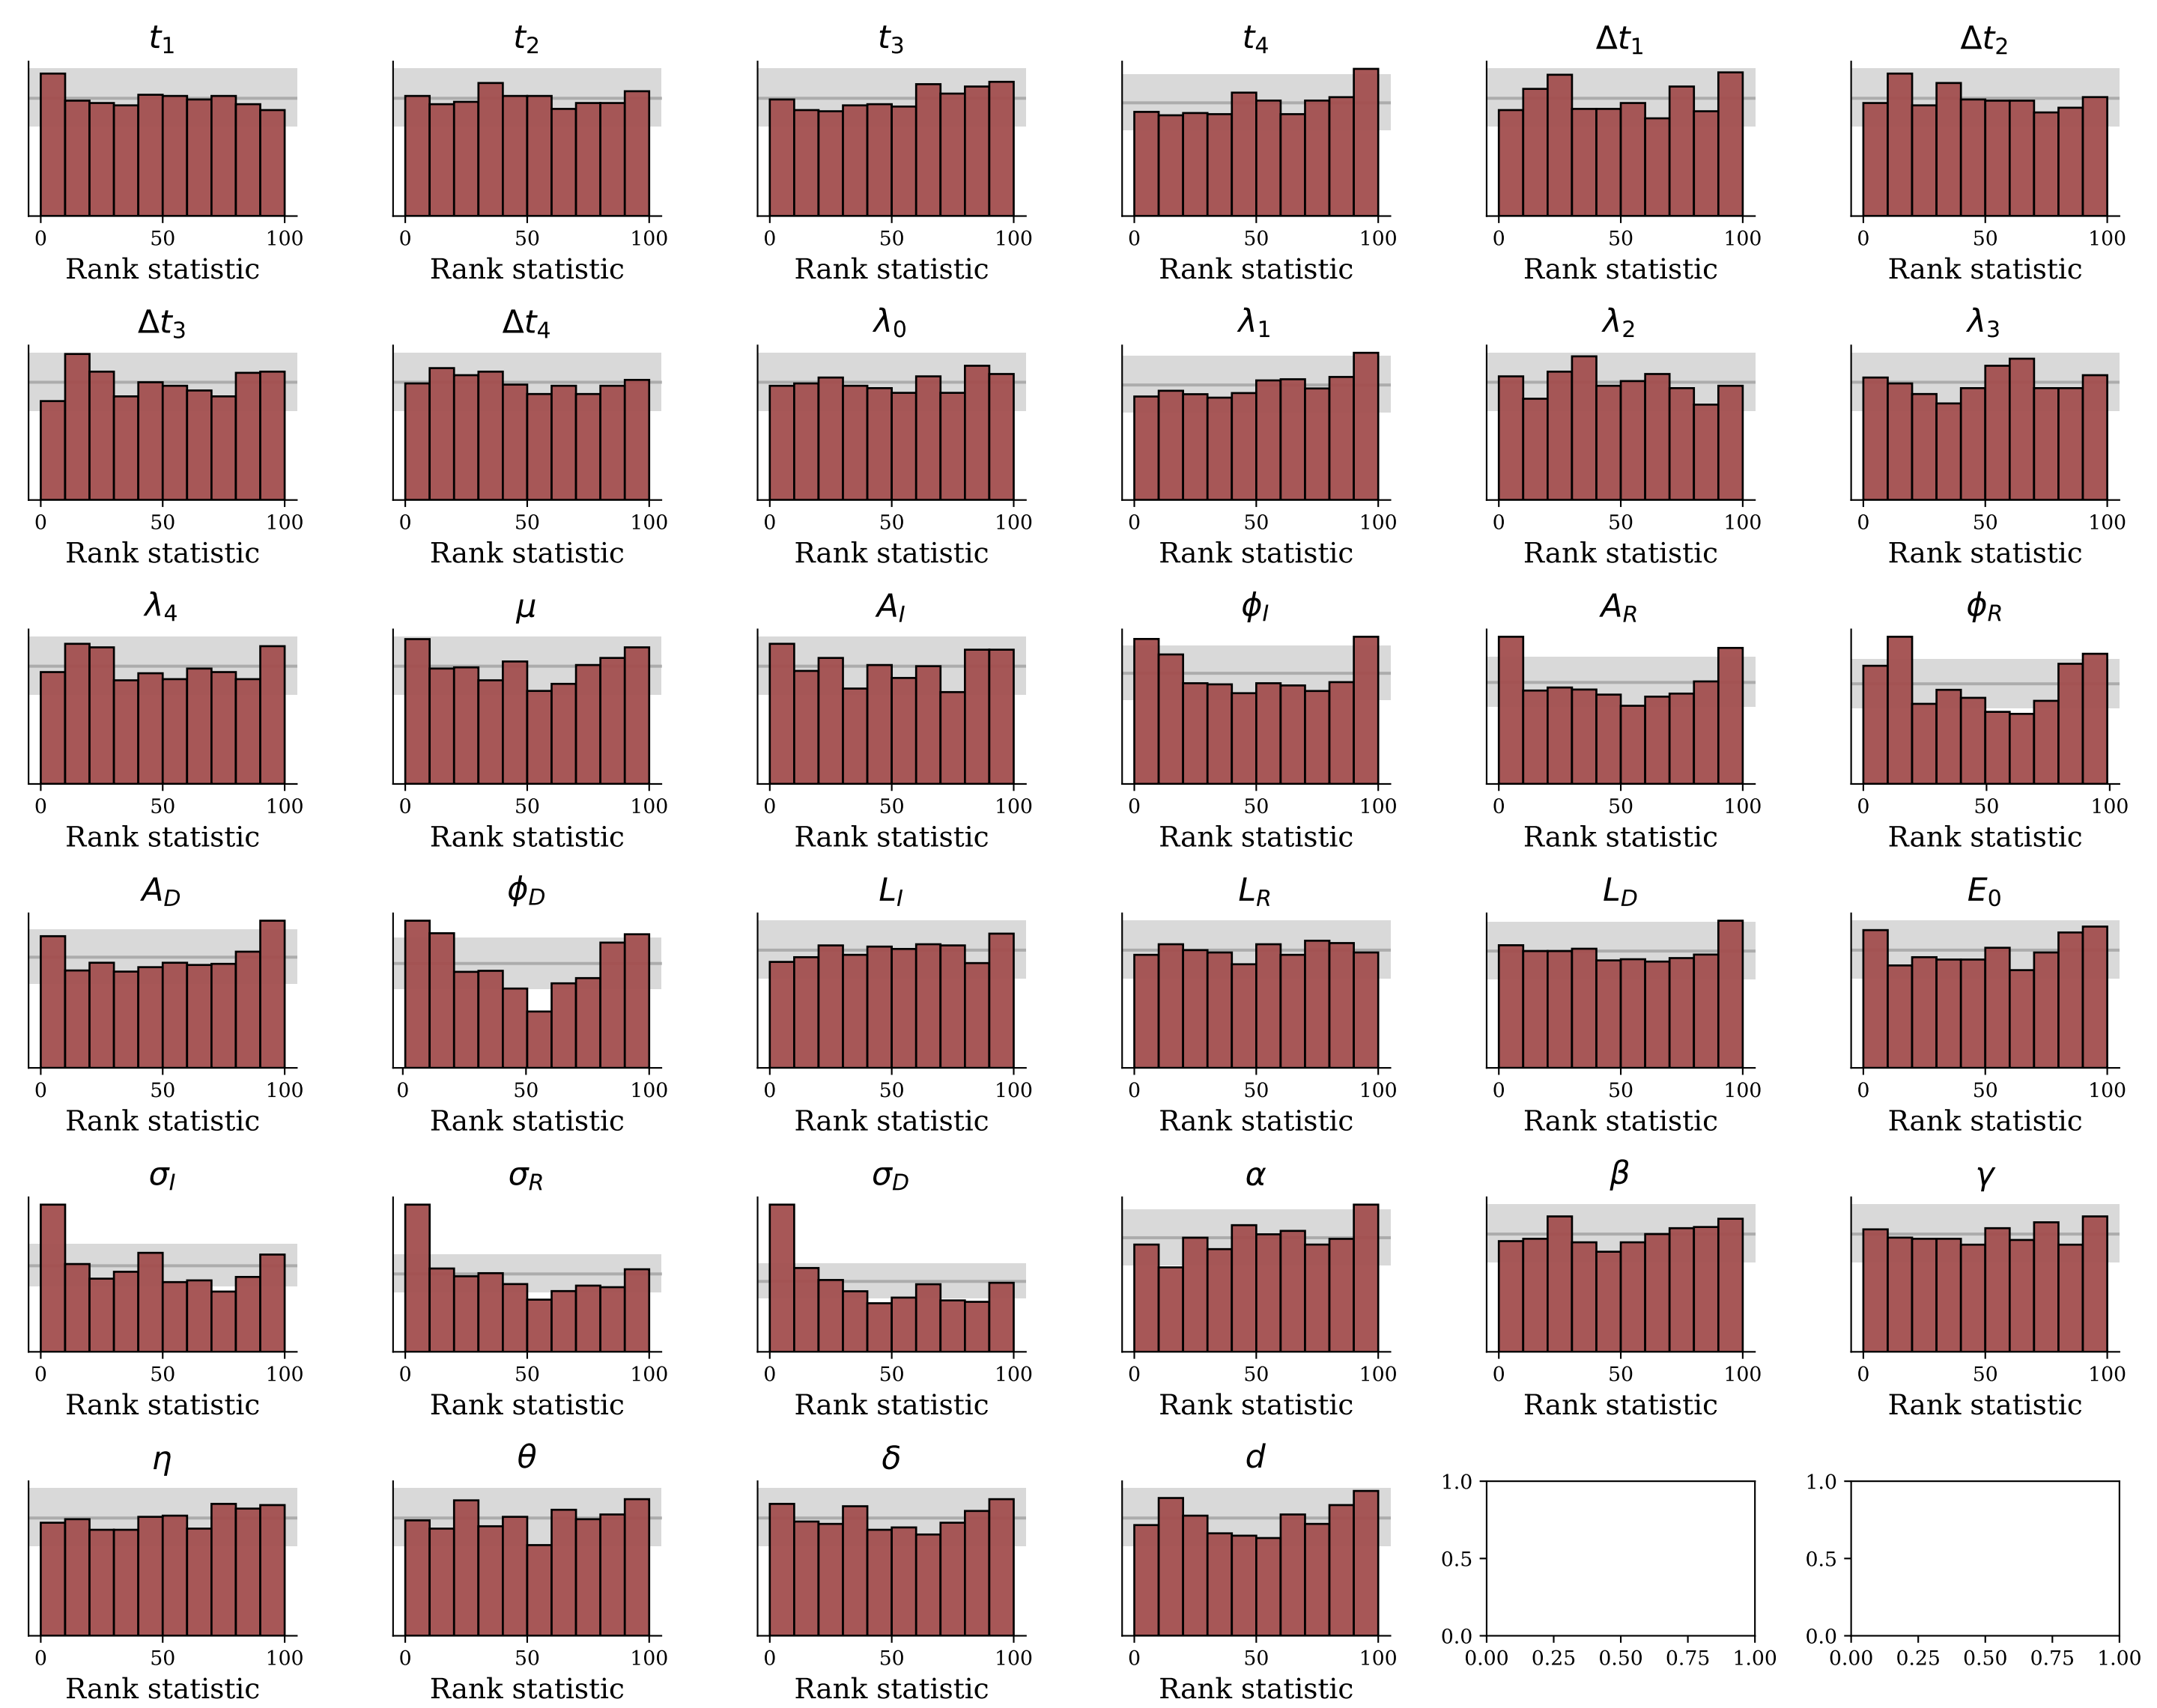

Supplement: supplementary_material [file attachment]

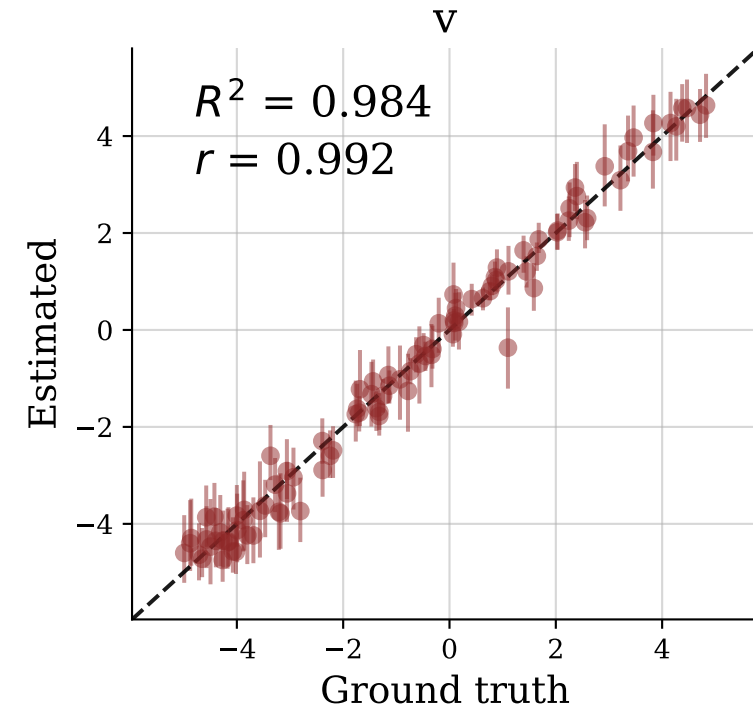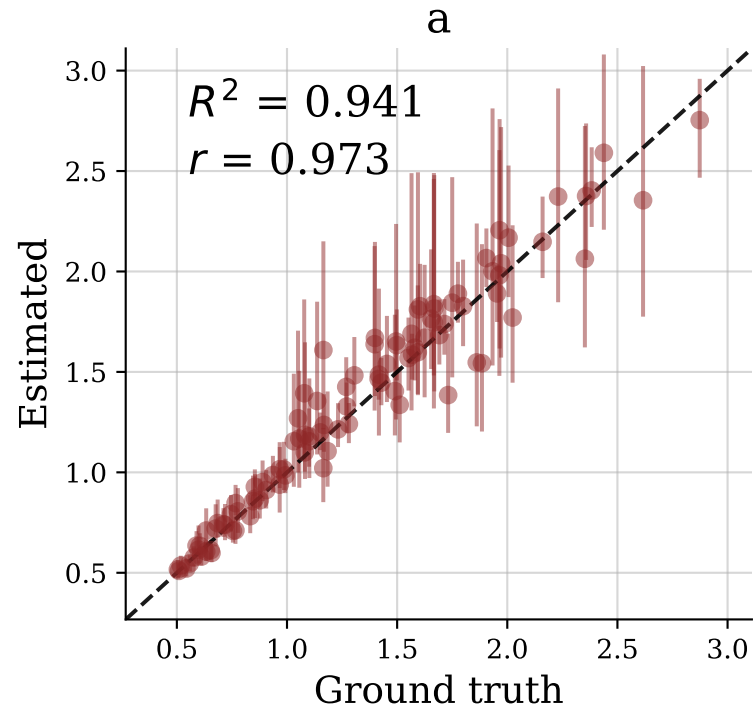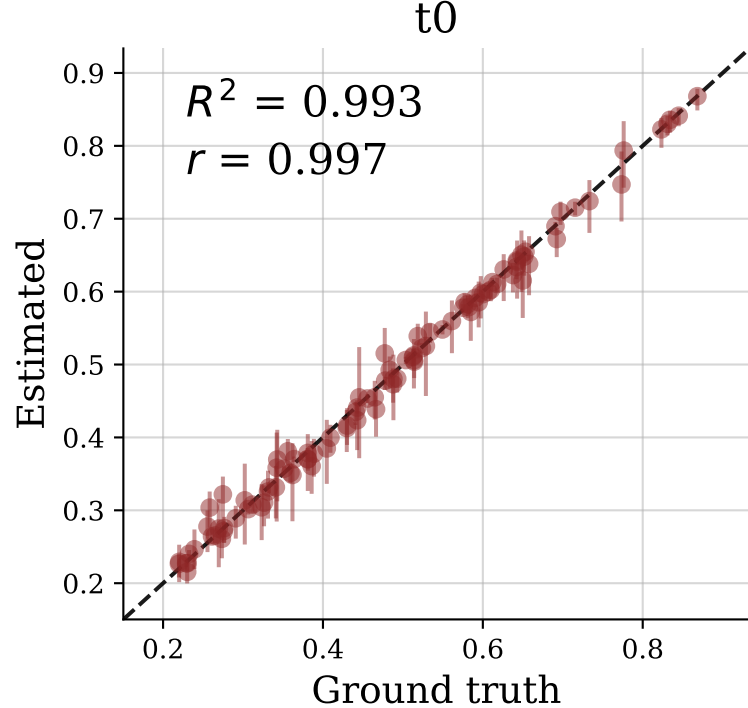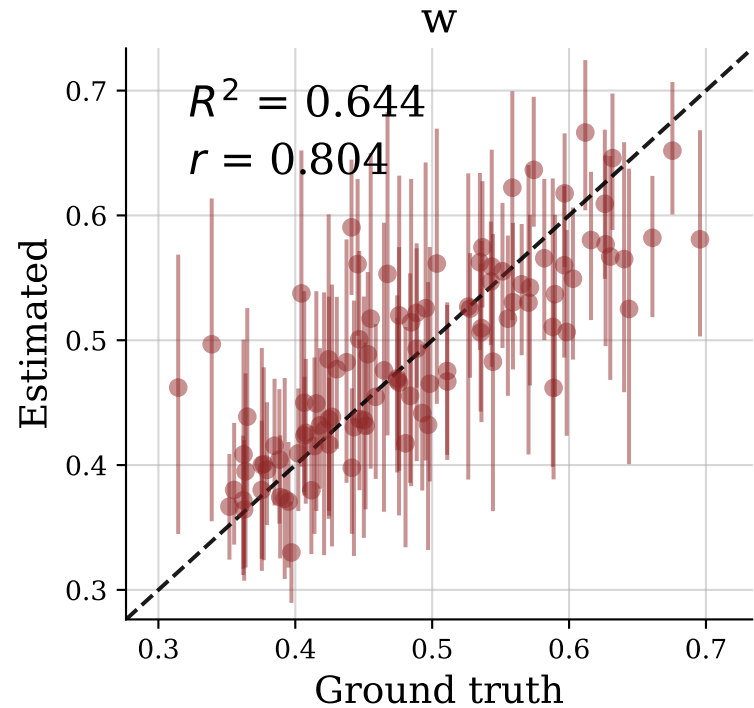

Supplement: supplementary_material [file attachment]

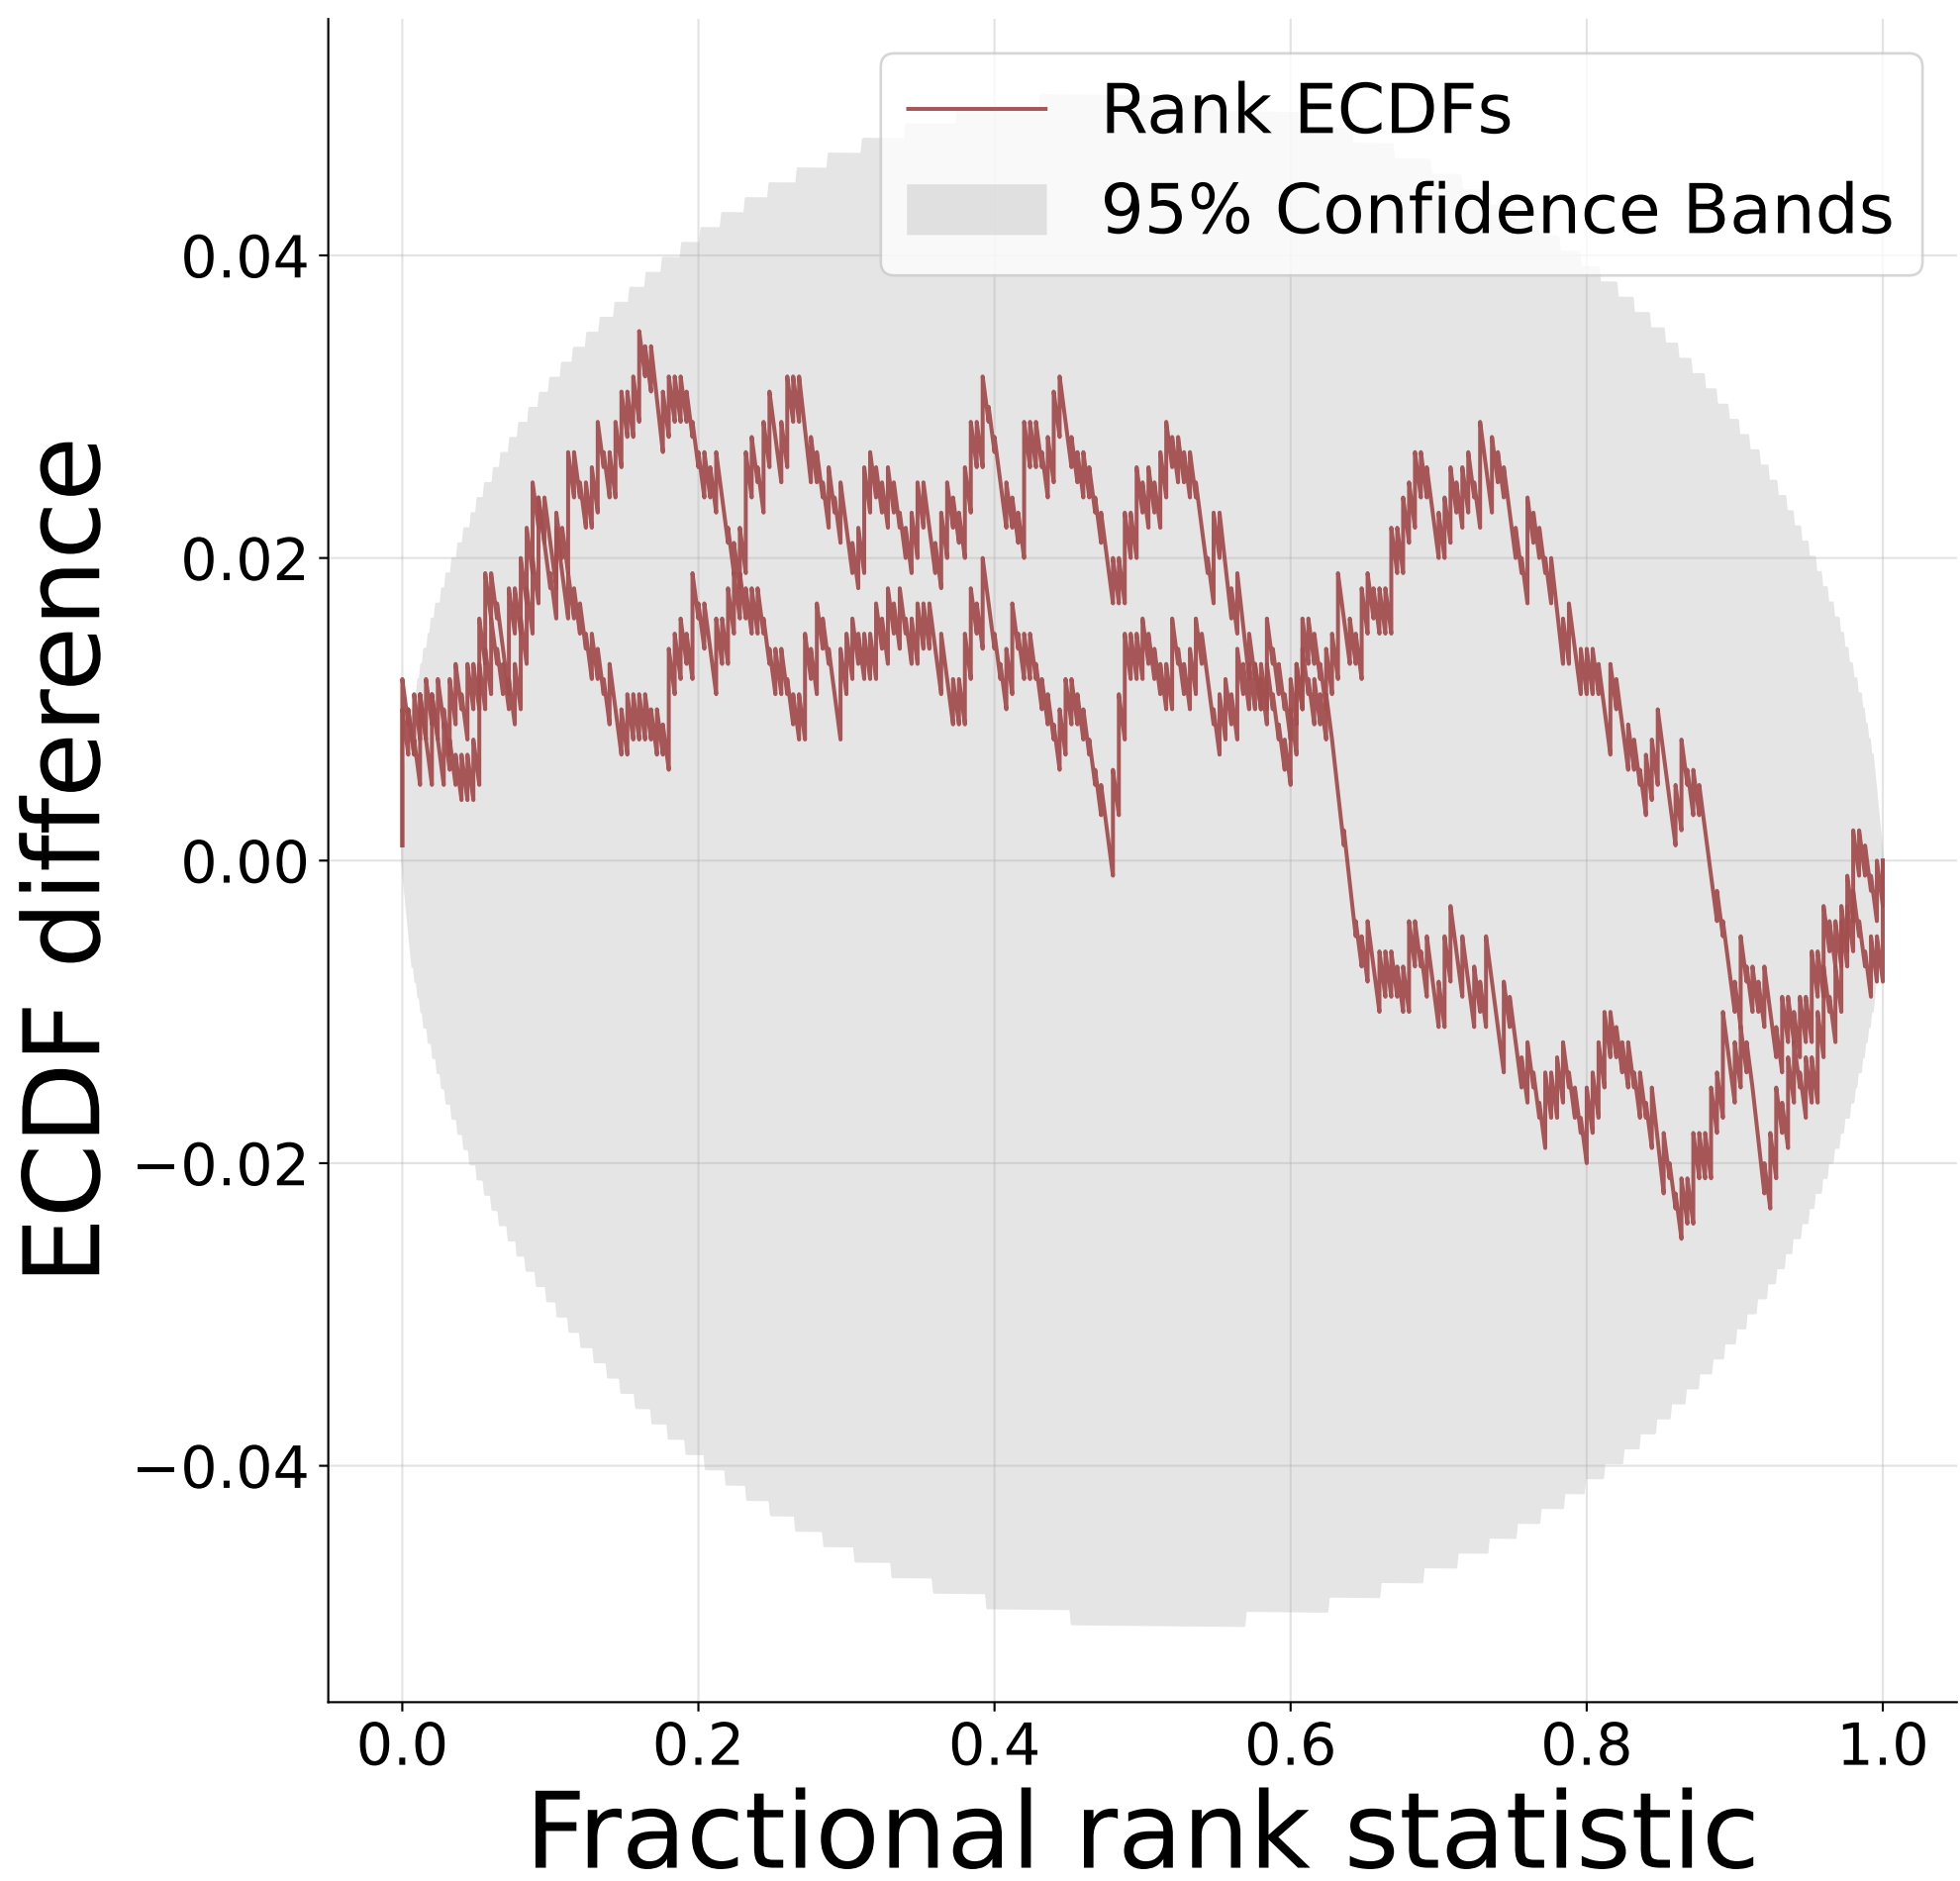

Supplement: supplementary_material [file attachment]

True

gSMC

NPE-C

SNRE-B

SNPE-C

SNVI

SNPLA

JANA

 $N = 2000$  $N = 6000$  $N = 10000$ 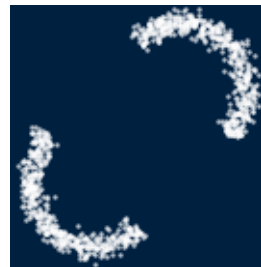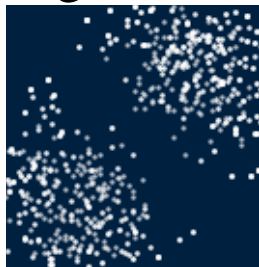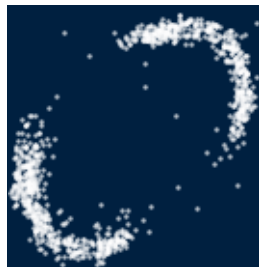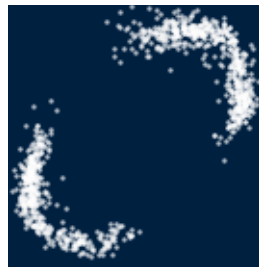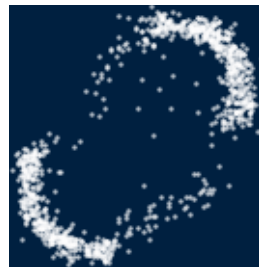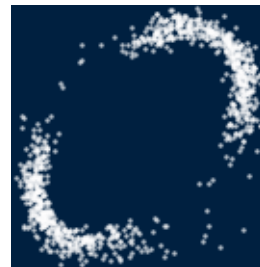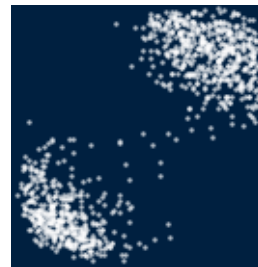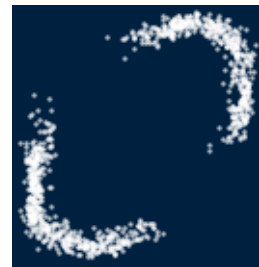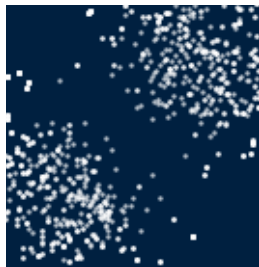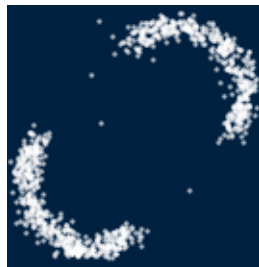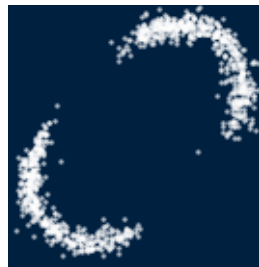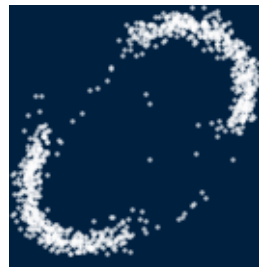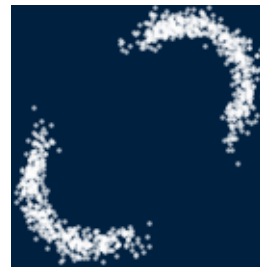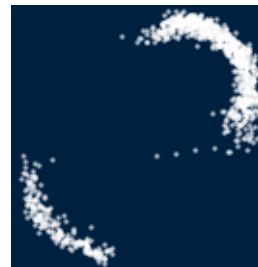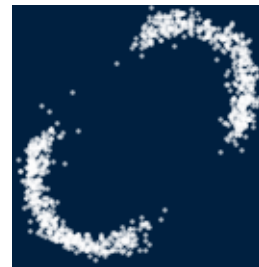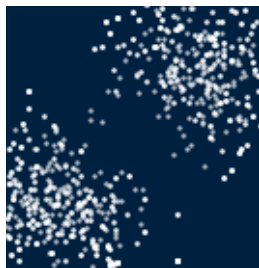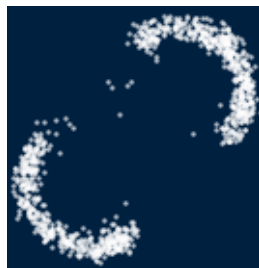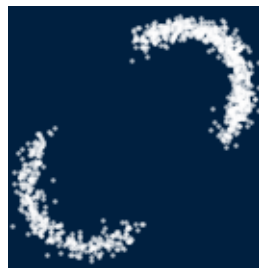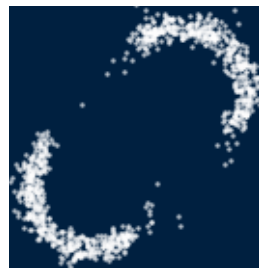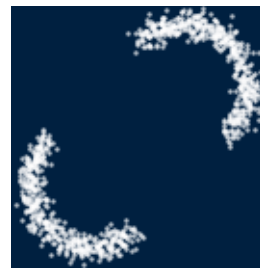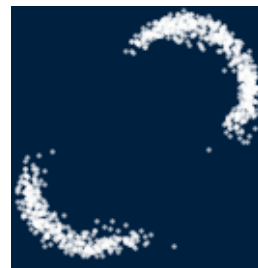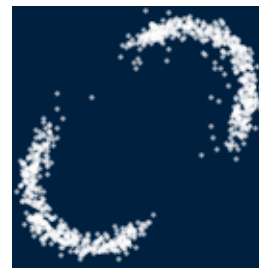

Supplement: supplementary_material [file attachment]

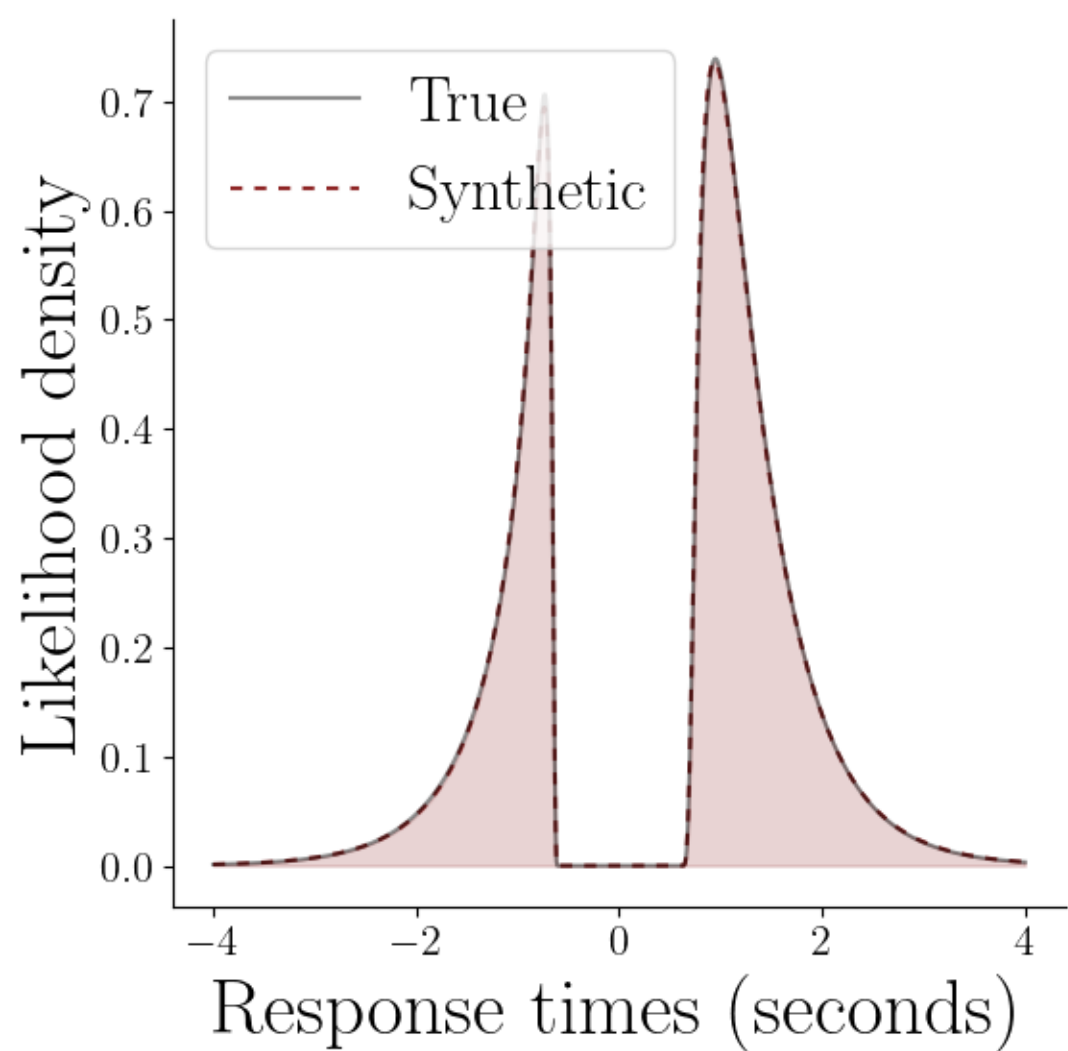

Supplement: supplementary_material [file attachment]

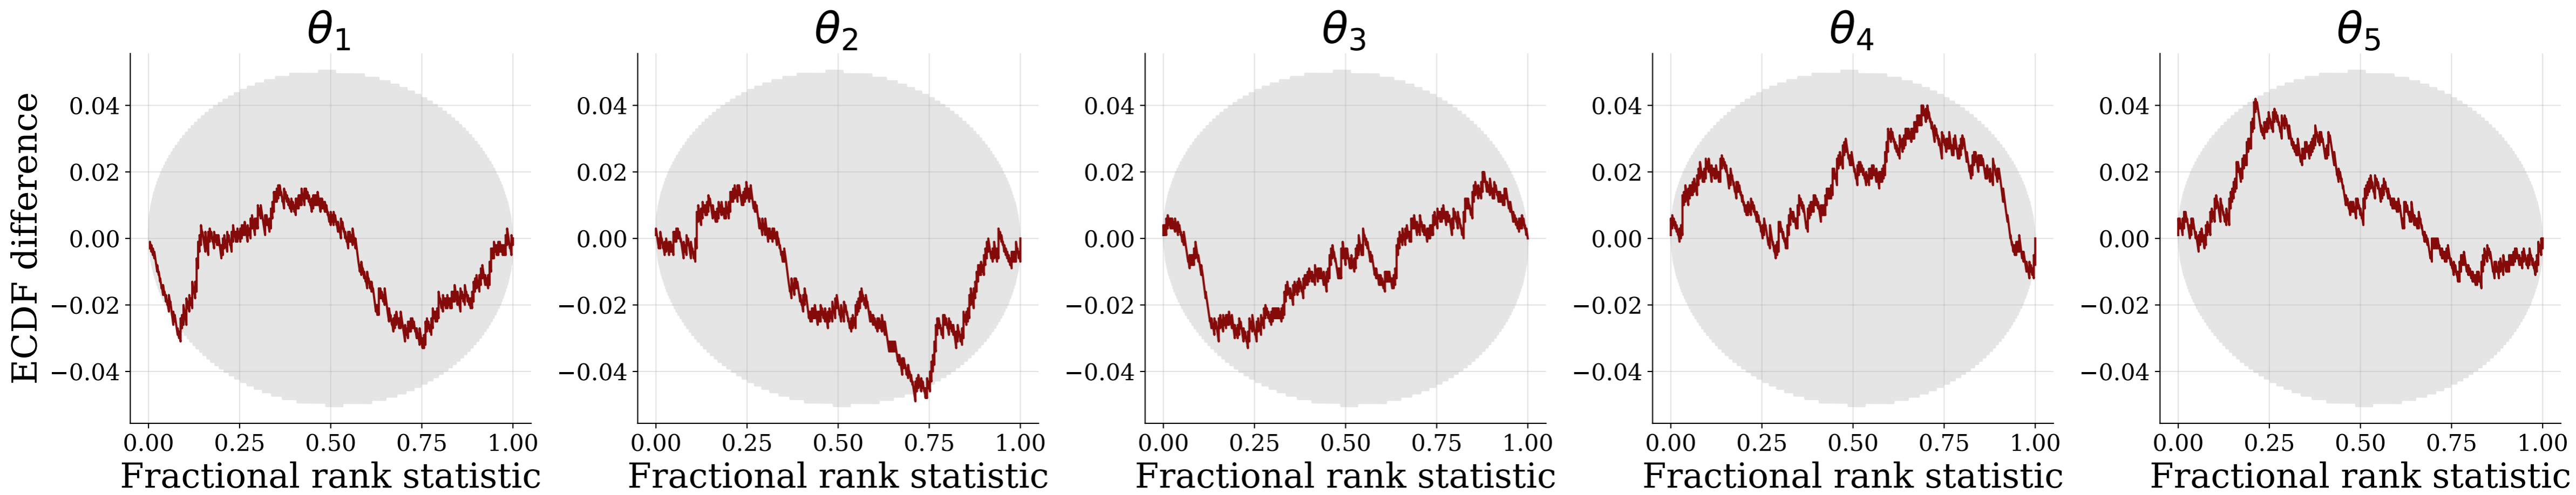

Supplement: supplementary_material [file attachment]

Likelihood density

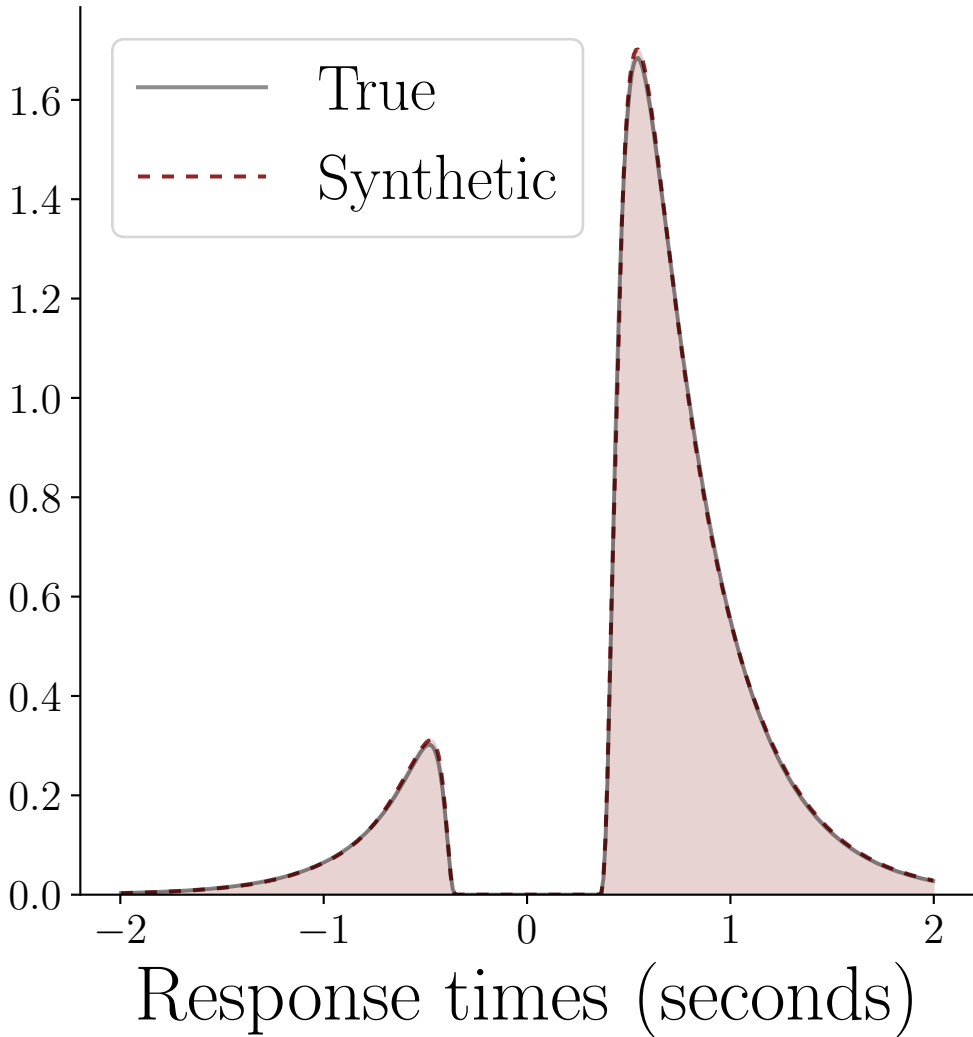

Supplement: supplementary_material [file attachment]

ECDF difference

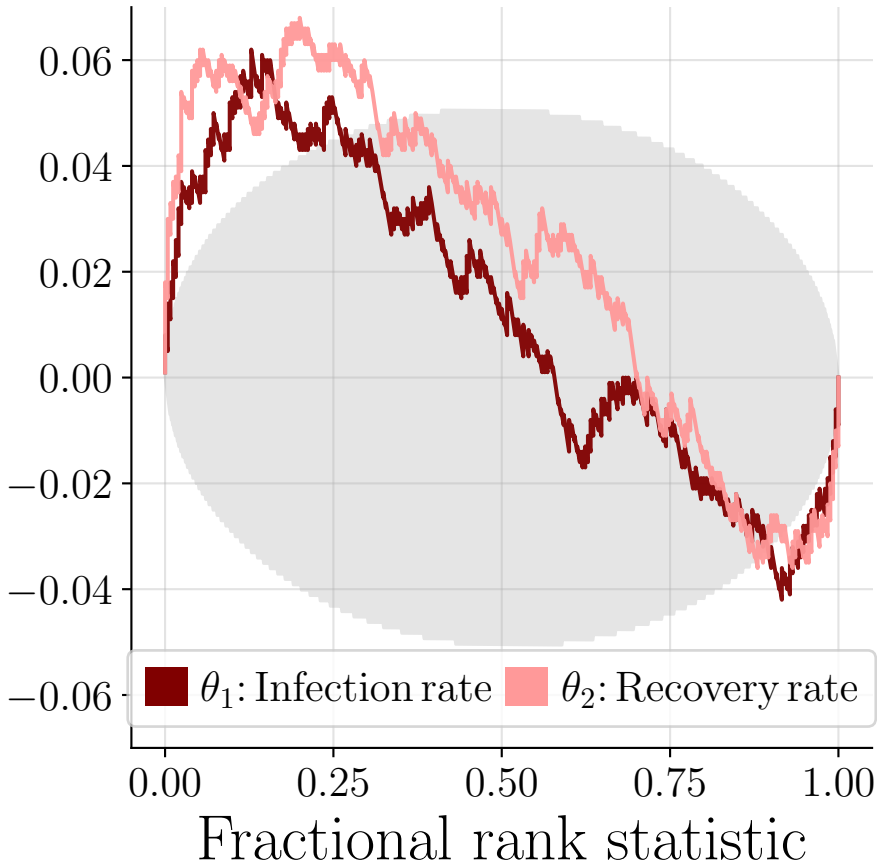

Supplement: supplementary_material [file attachment]

Surrogate

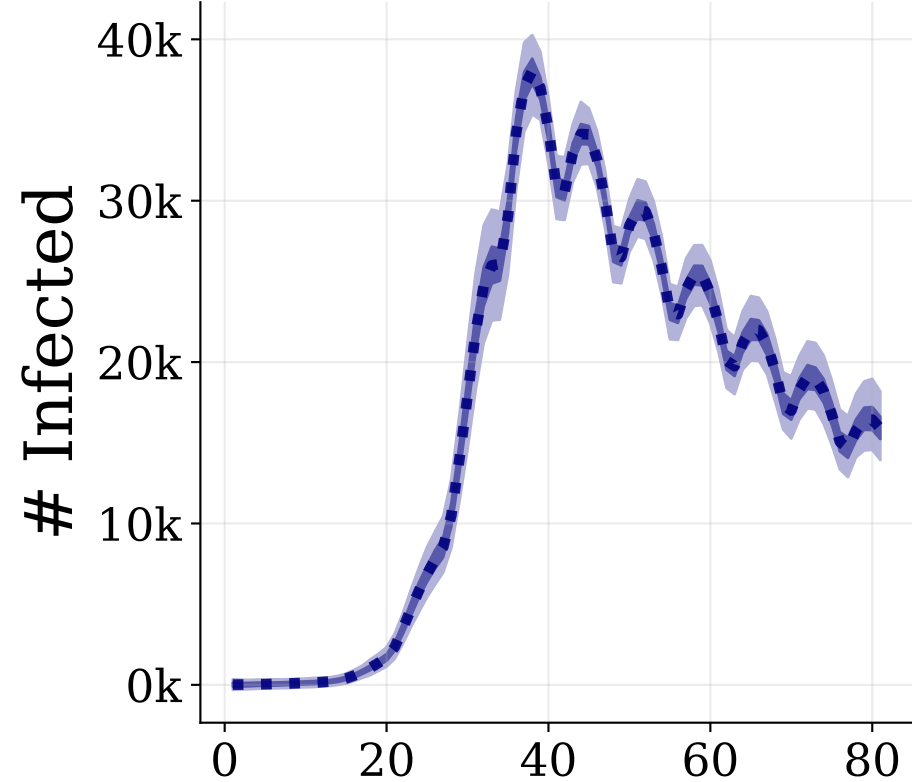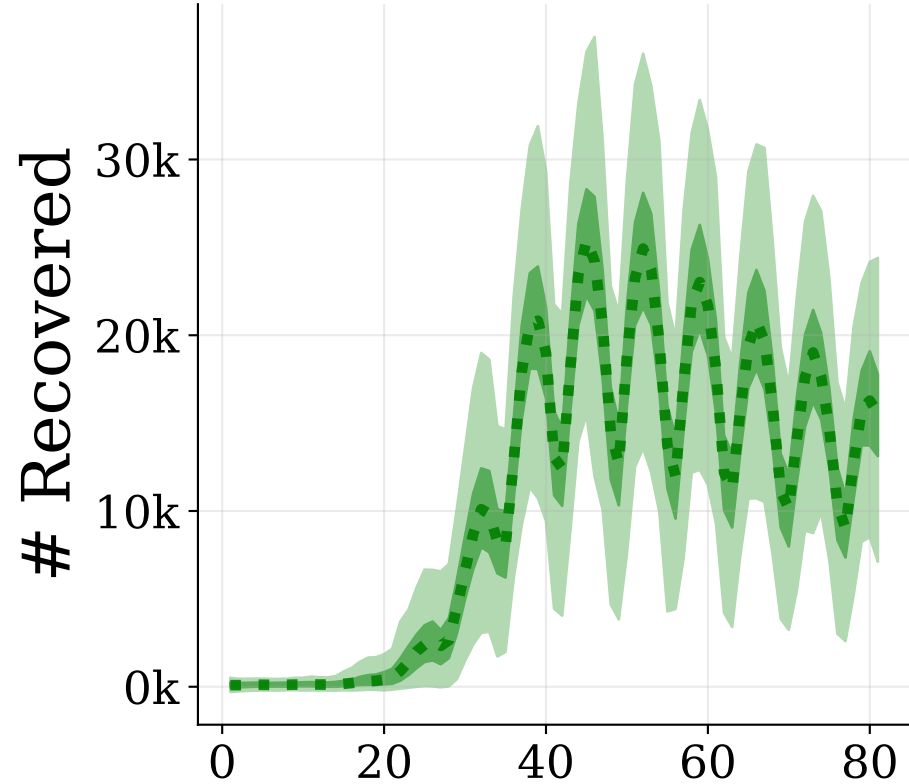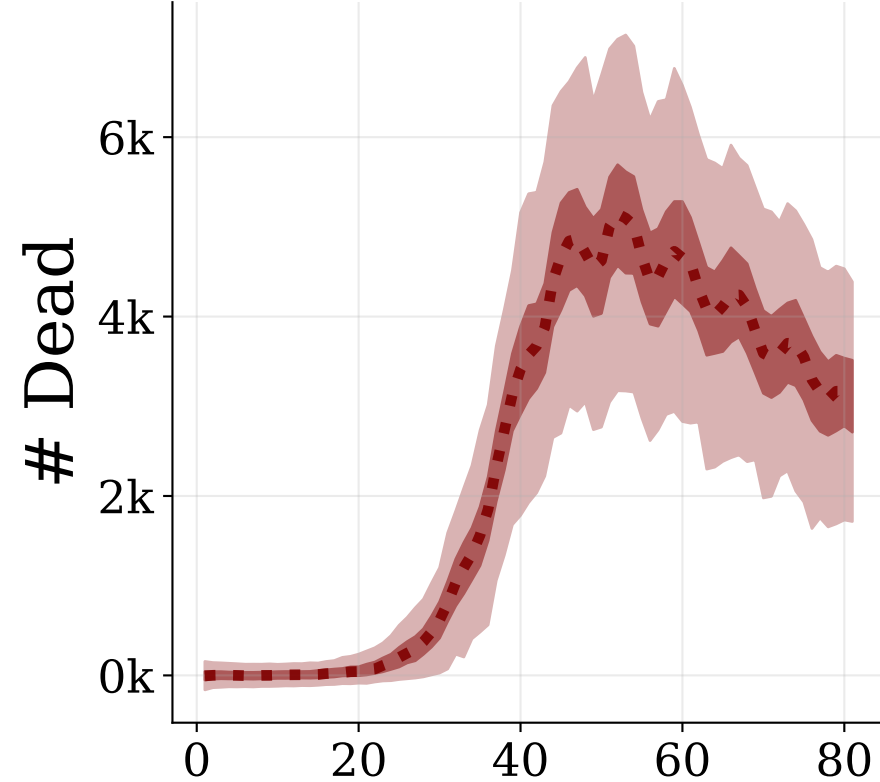

Simulator

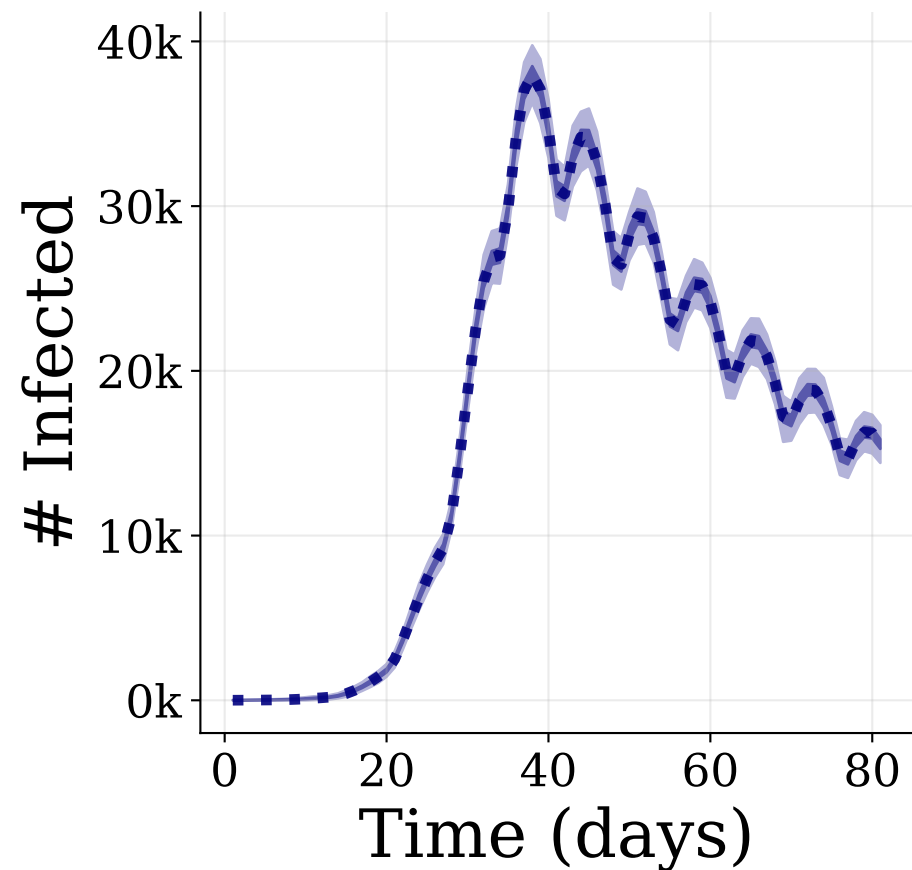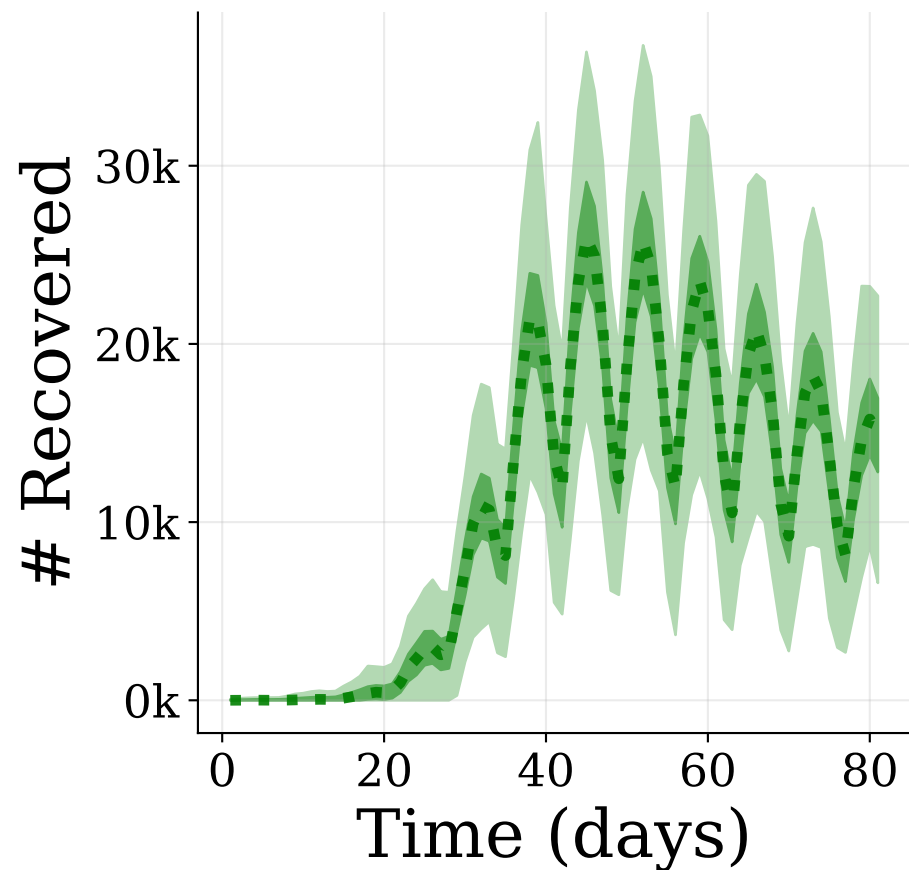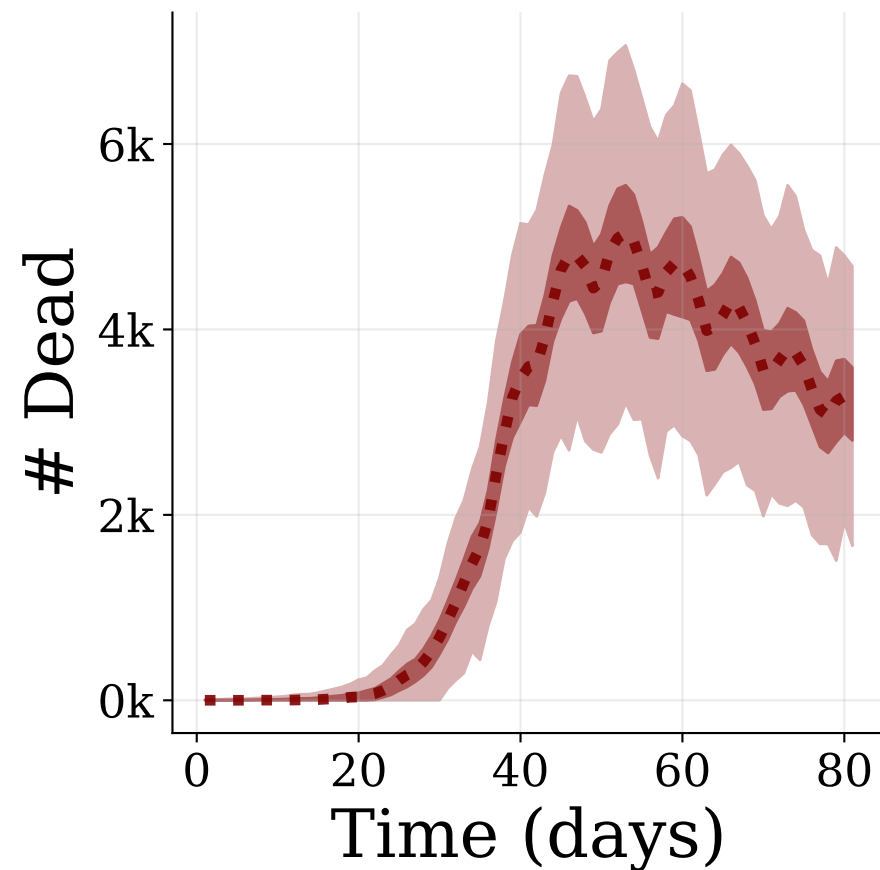

Supplement: supplementary_material [file attachment]

ECDF difference

$\mu_1$

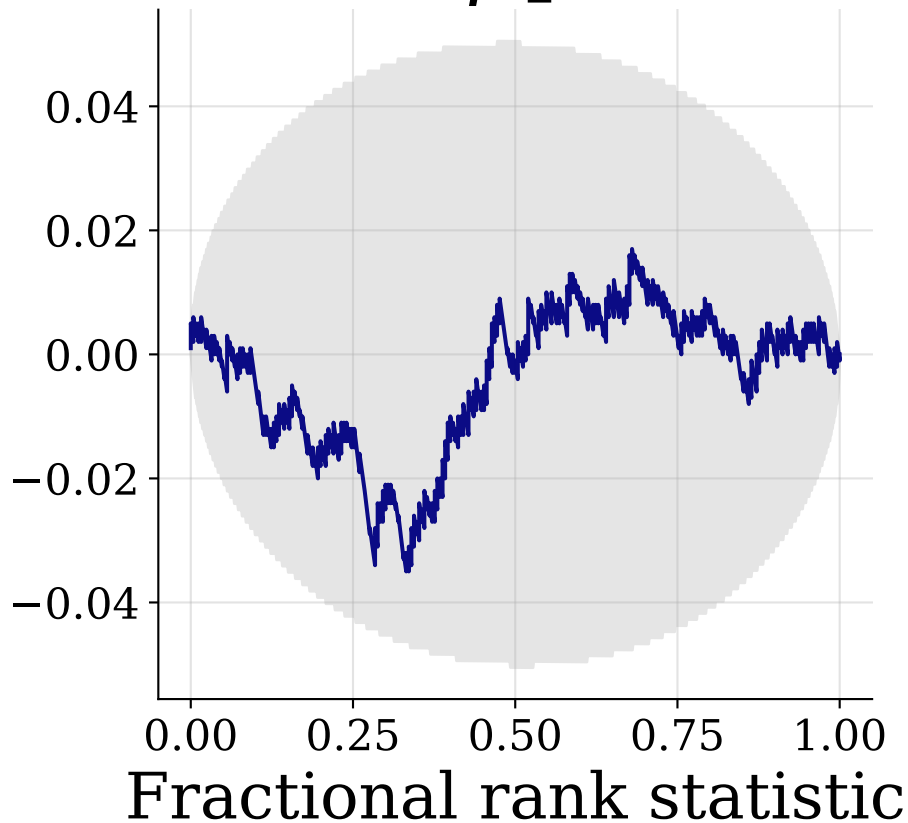

$\mu_2$

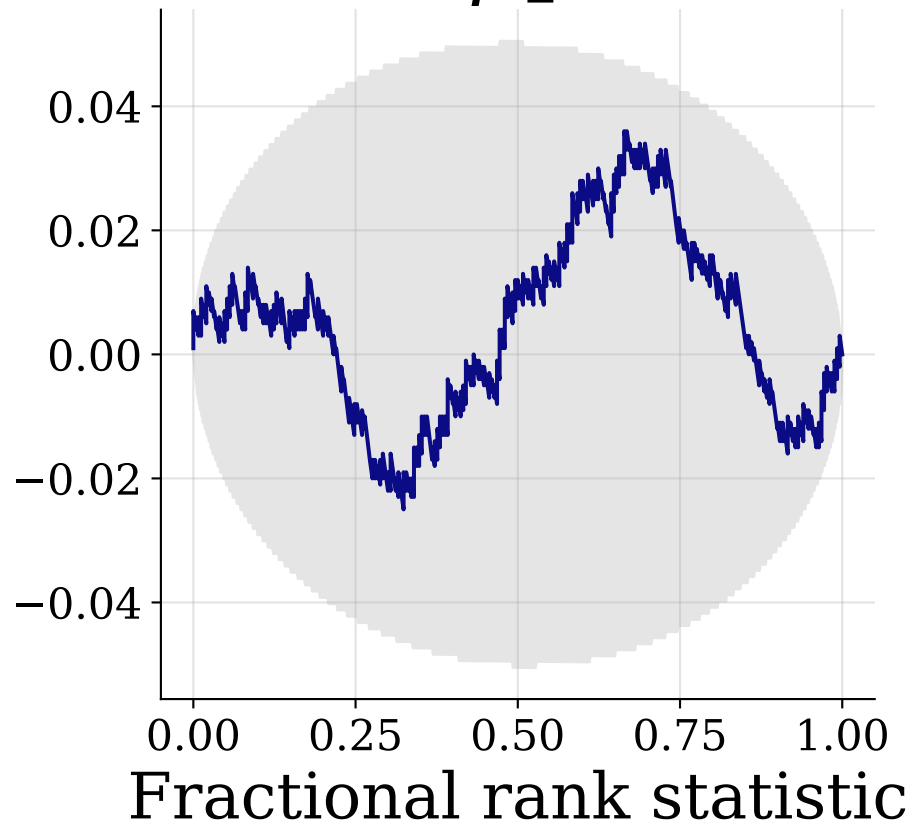

Supplement: supplementary_material [file attachment]

True

NPE-C

SNRE-B

SNPE-C

SNVI

SNPLA

JANA

 $N = 2000$  $N = 6000$  $N = 10000$ 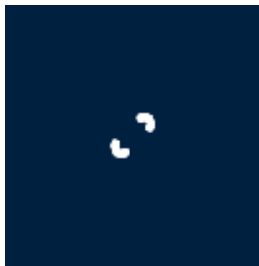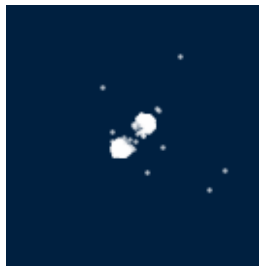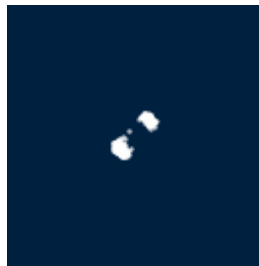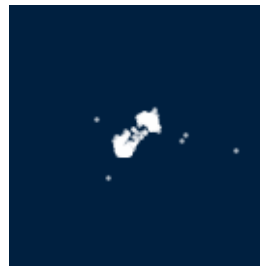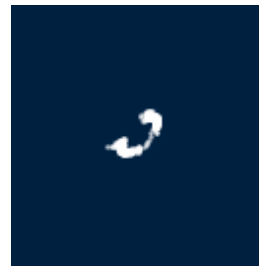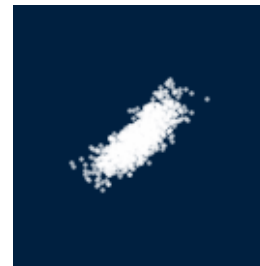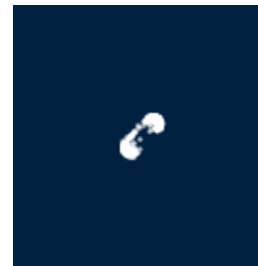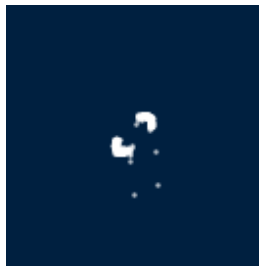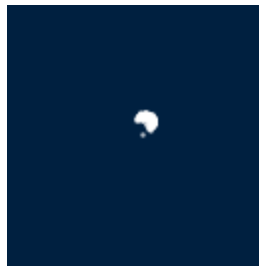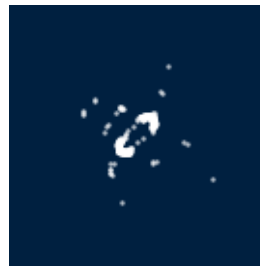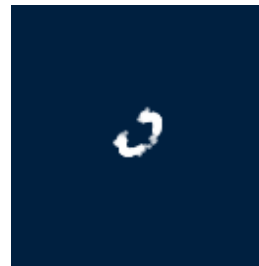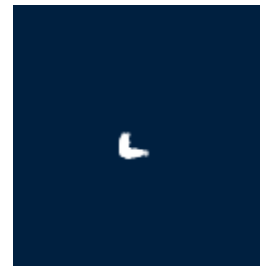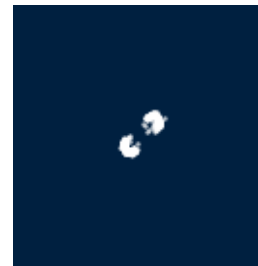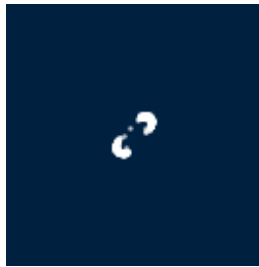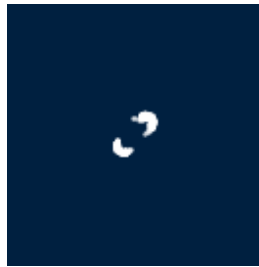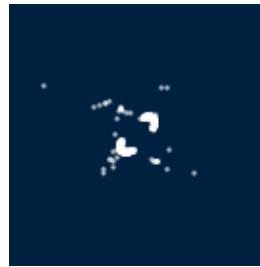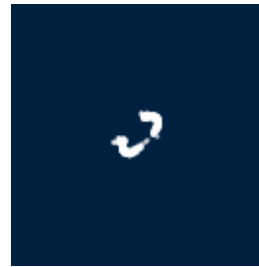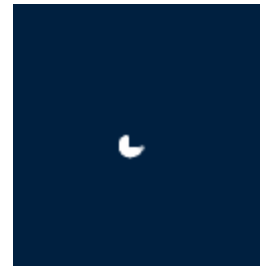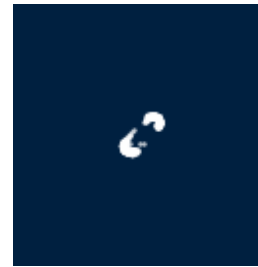

Supplement: supplementary_material [file attachment]

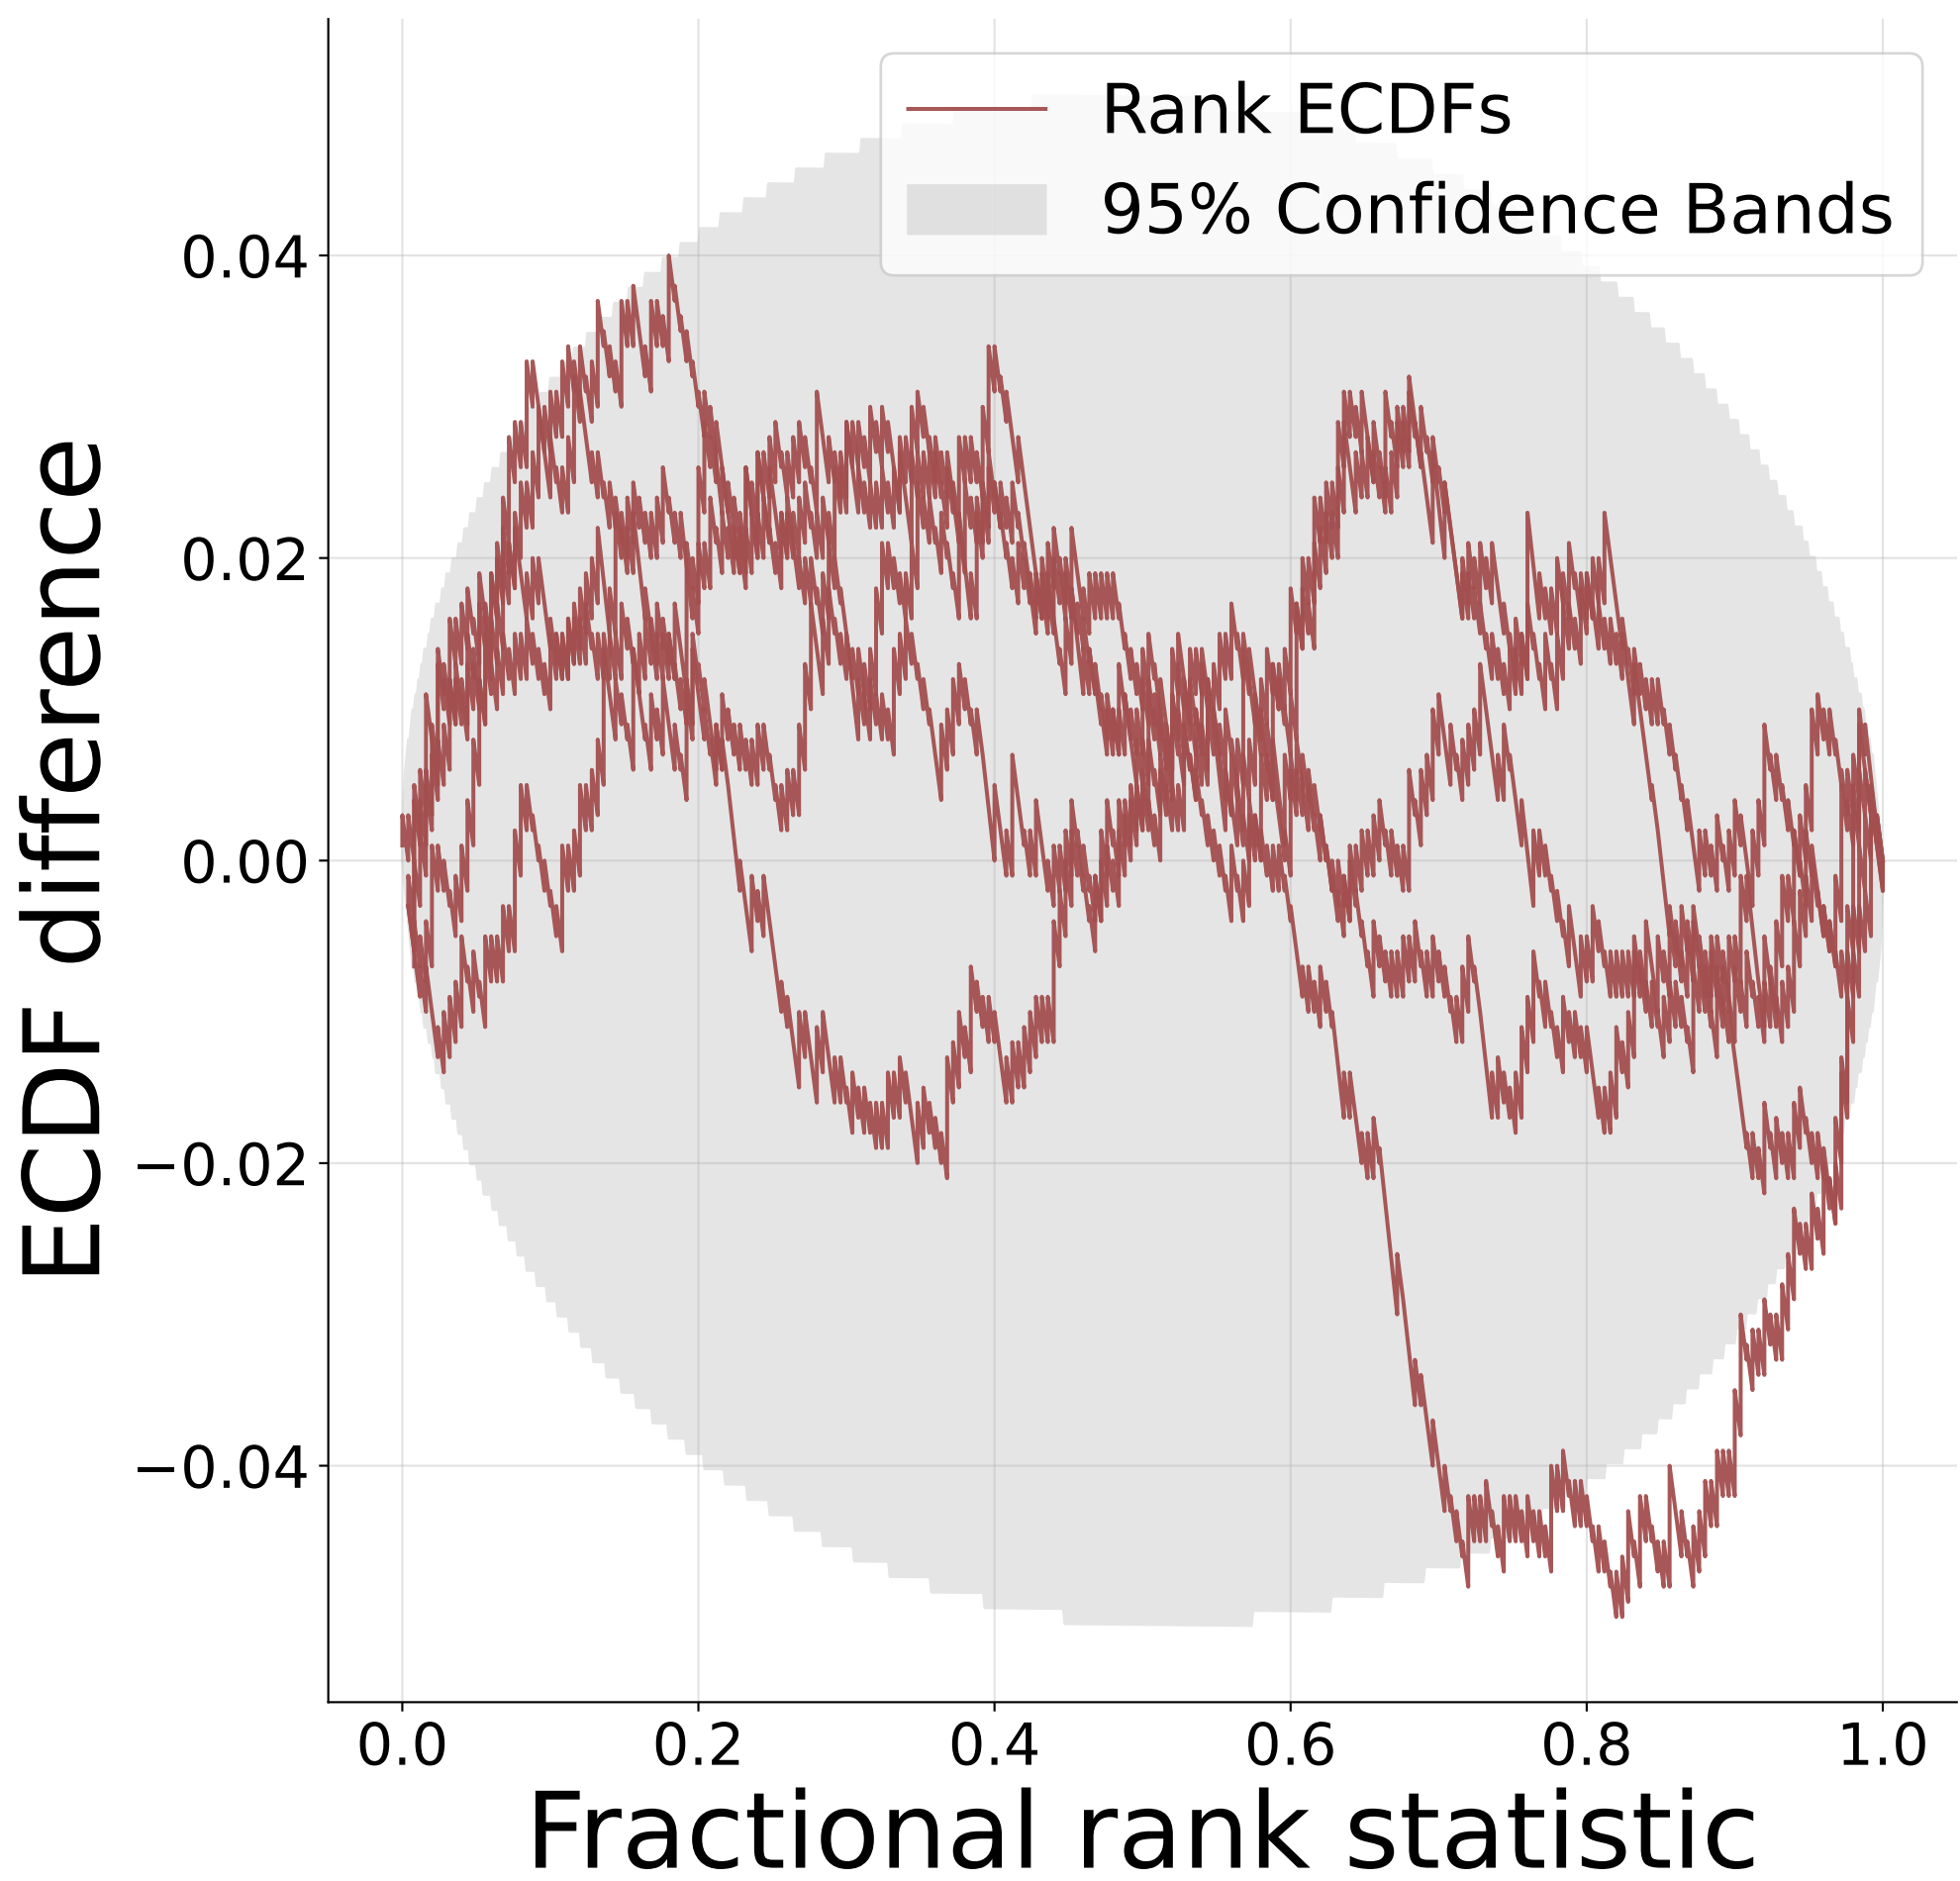

Supplement: supplementary_material [file attachment]

True

gSMC

NPE-C

SNRE-B

SNPE-C

SNVI

SNPLA

JANA

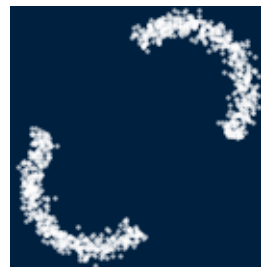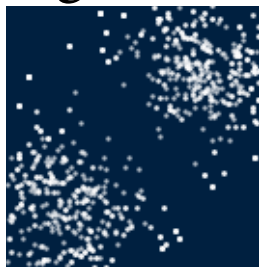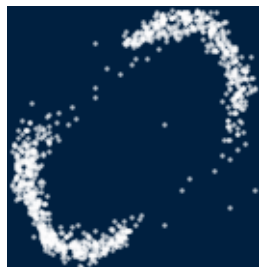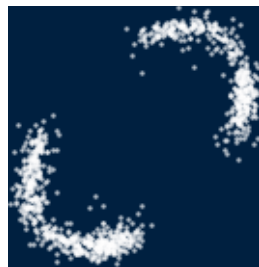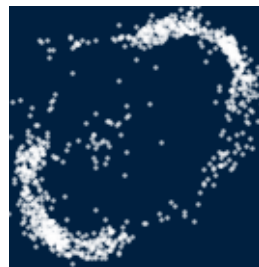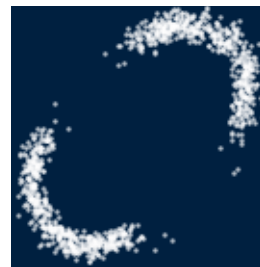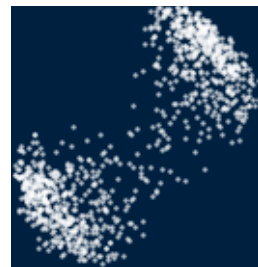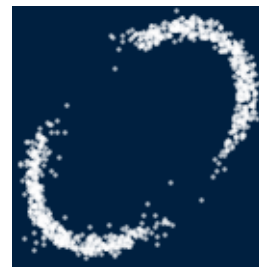 $N = 2000$ 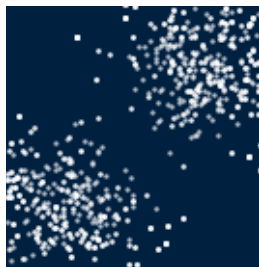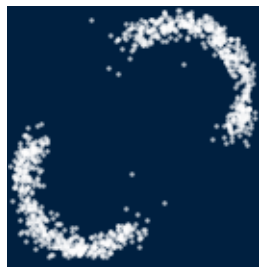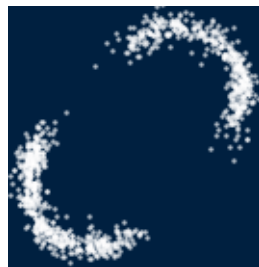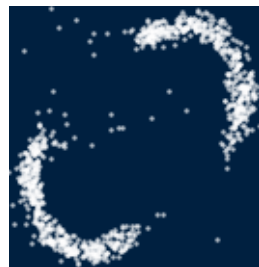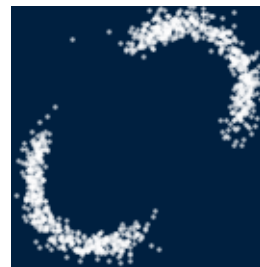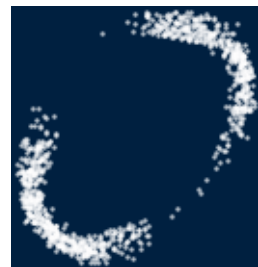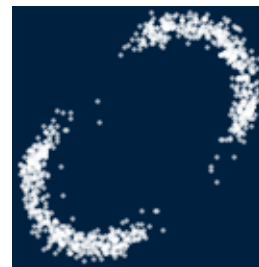 $N = 6000$ 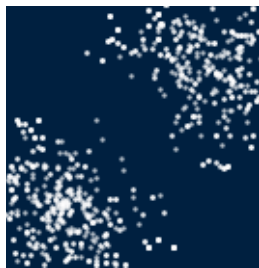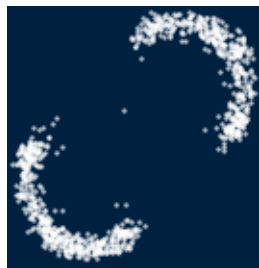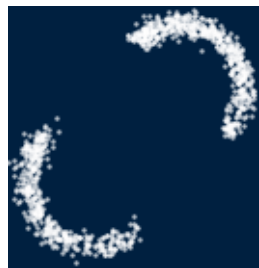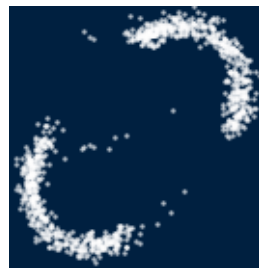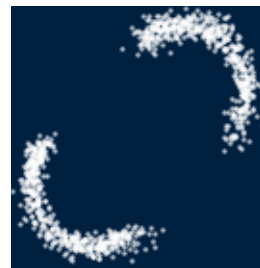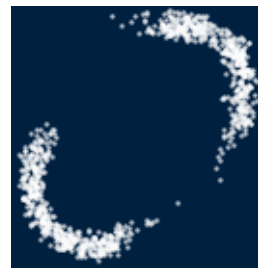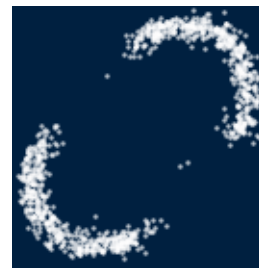 $N = 10000$

Supplement: supplementary_material [file attachment]

JANA

$$R^2 = 1.000$$

$$r = 1.000$$

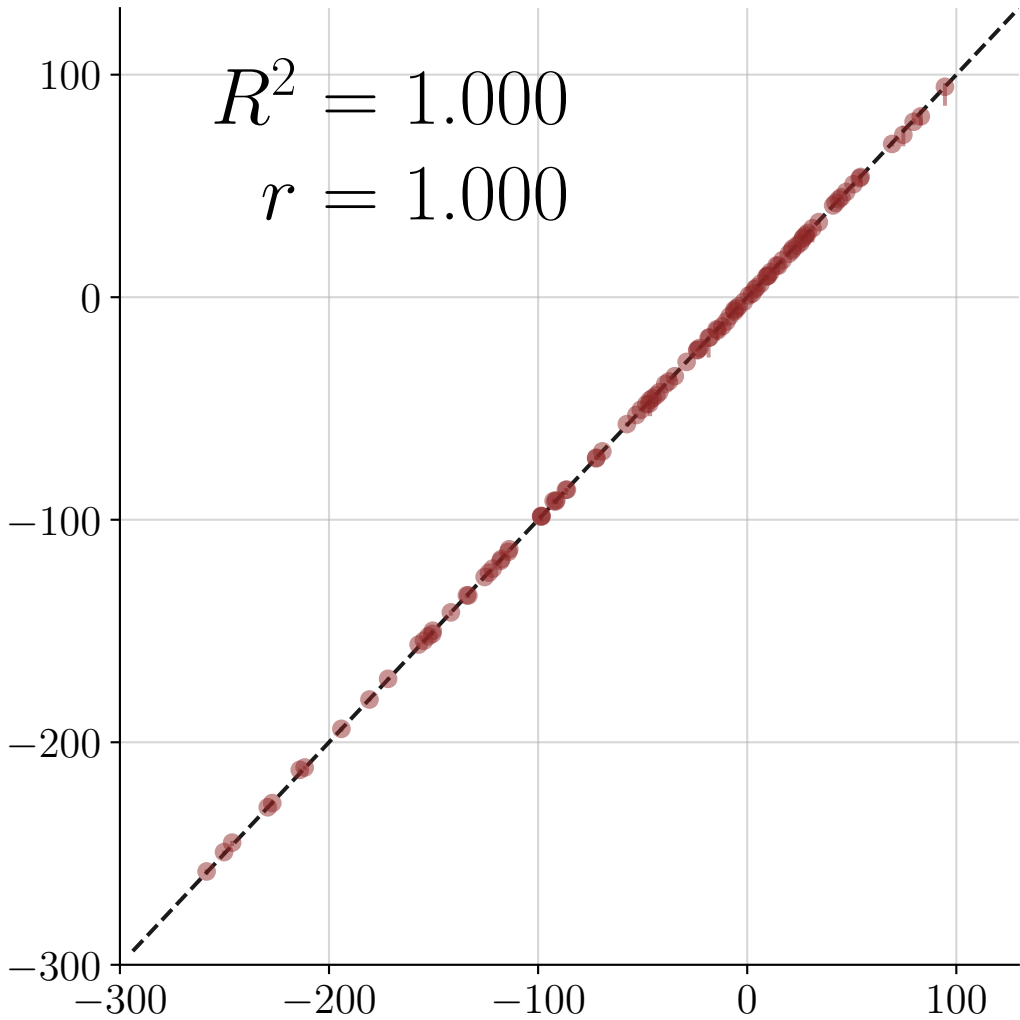

Bridge Sampling

Supplement: supplementary_material [file attachment]

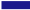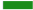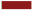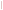

Mediain

Supplement: supplementary_material [file attachment]

Surrogate

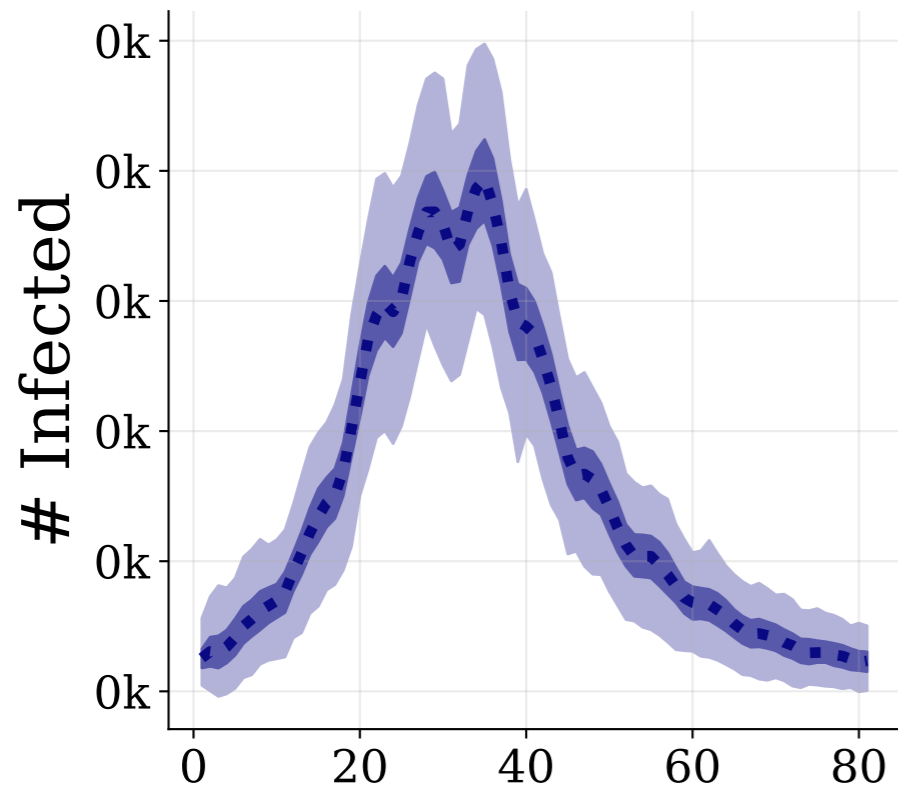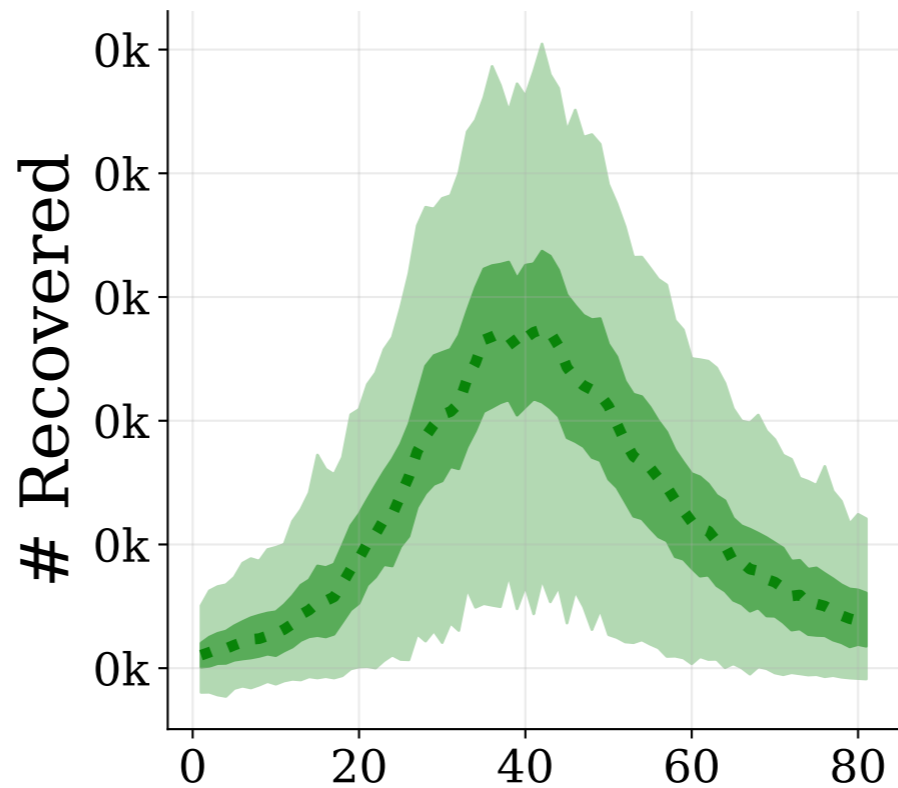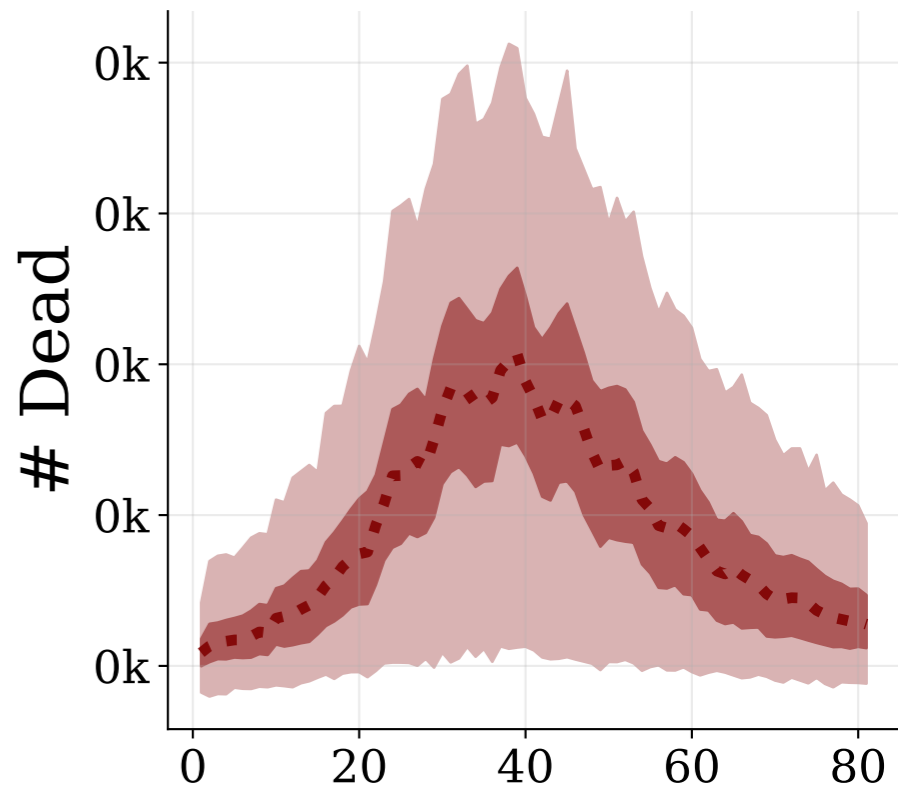

Simulator

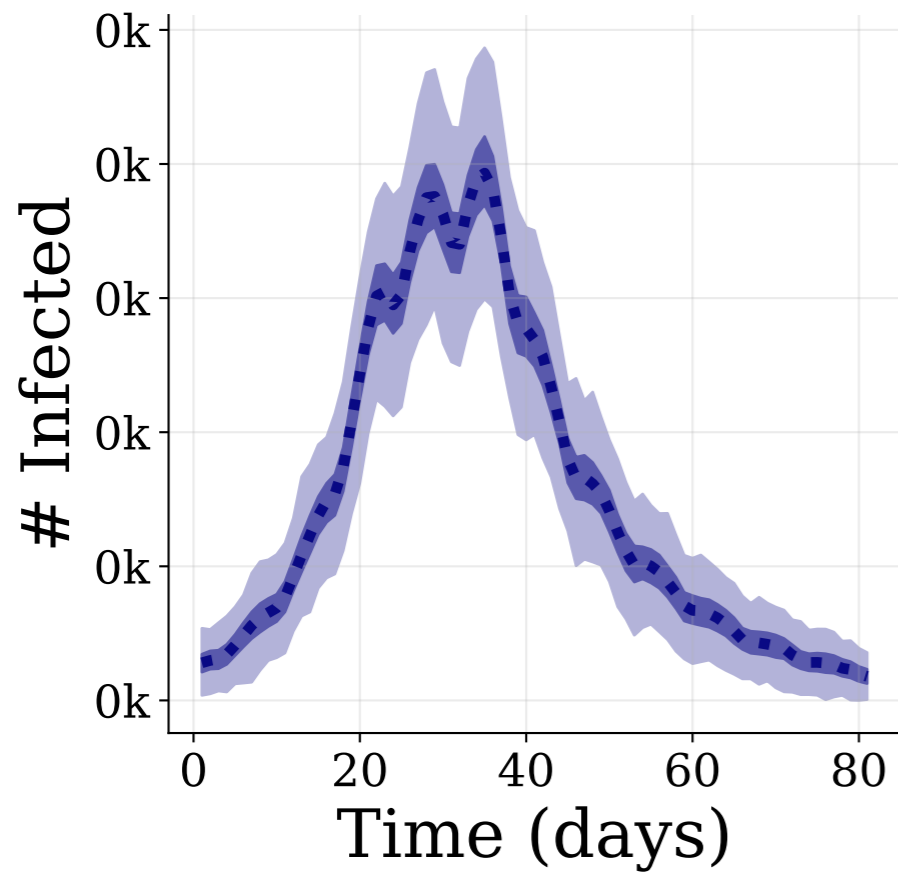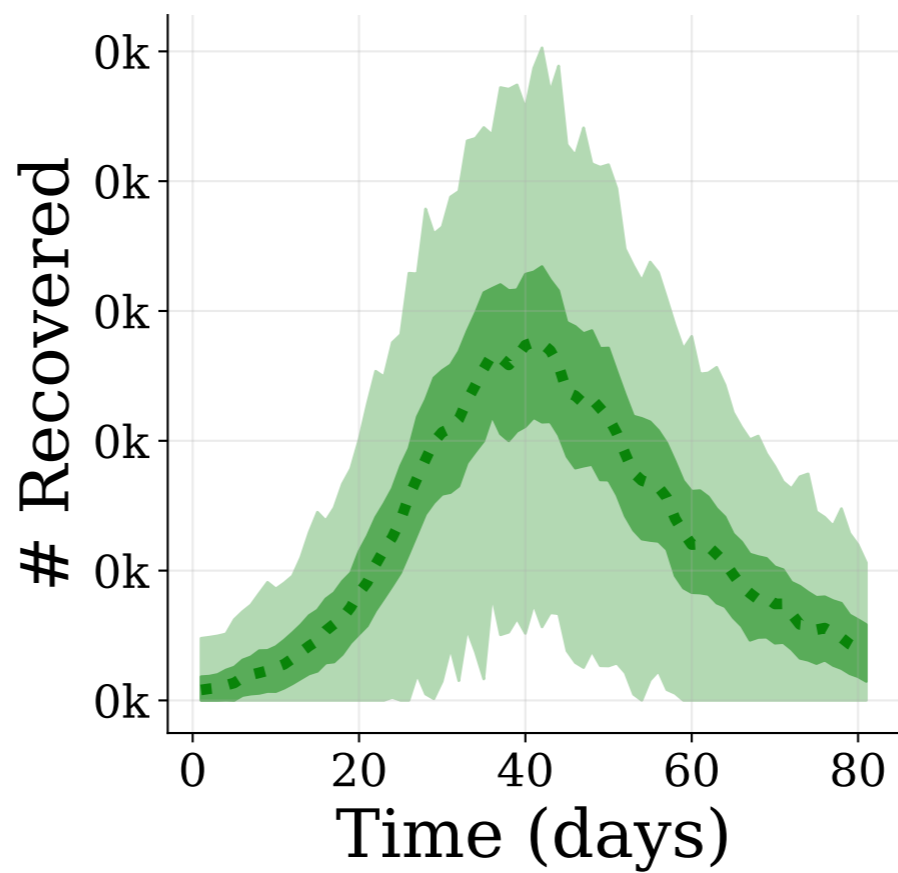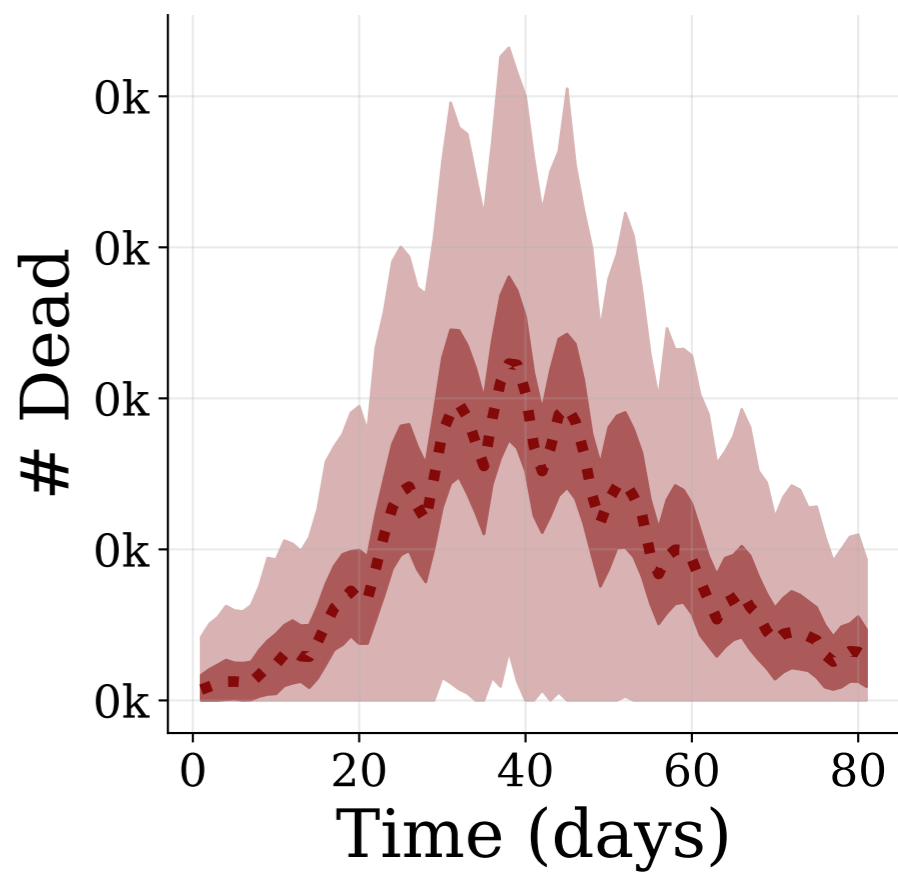

Supplement: supplementary_material [file attachment]

True

NPE-C

SNRE-B

SNPE-C

SNVI

SNPLA

JANA

 $N = 2000$  $N = 6000$  $N = 10000$ 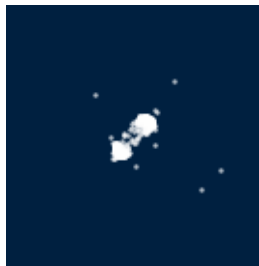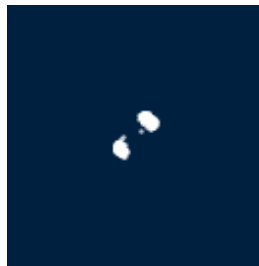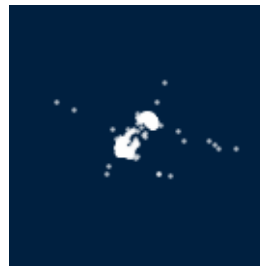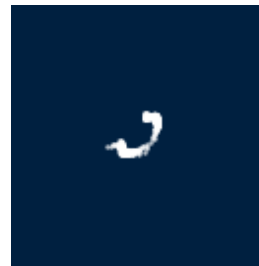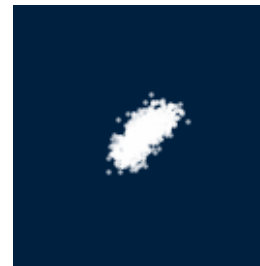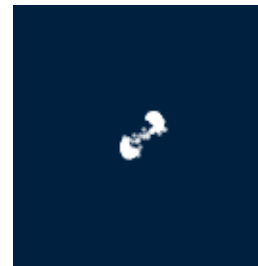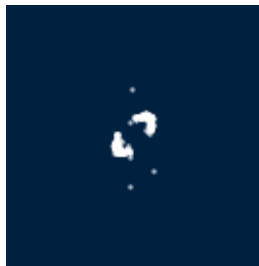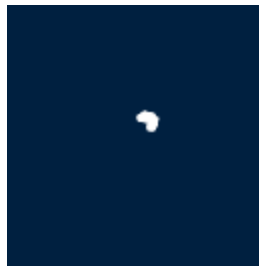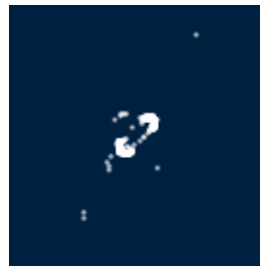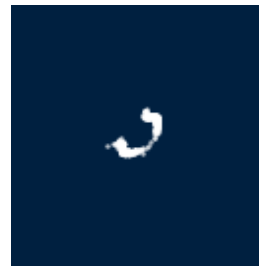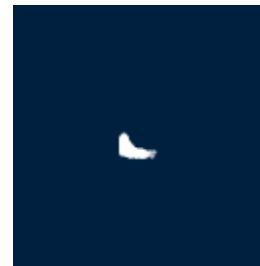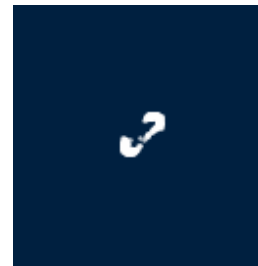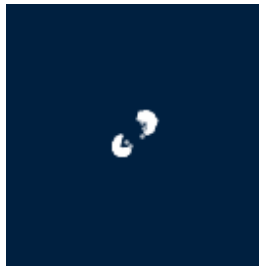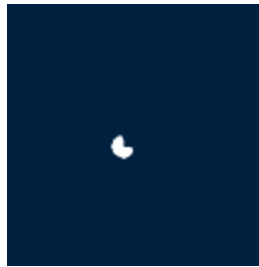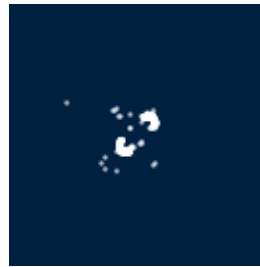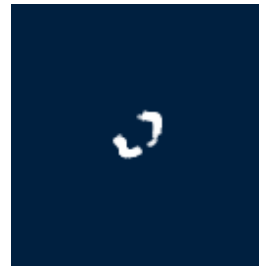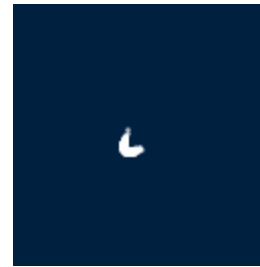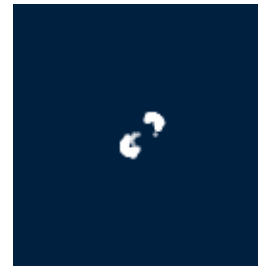

Supplement: supplementary_material [file attachment]

True

NPE-C

SNRE-B

SNPE-C

SNVI

SNPLA

JANA

 $N = 2000$  $N = 6000$  $N = 10000$ 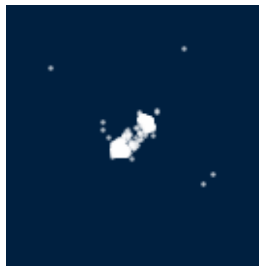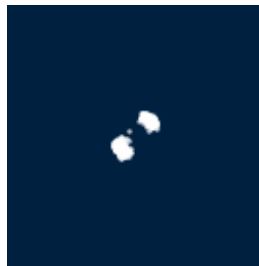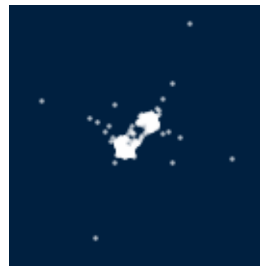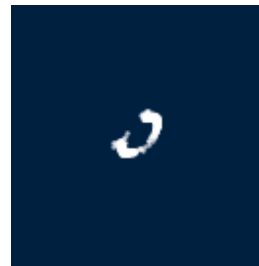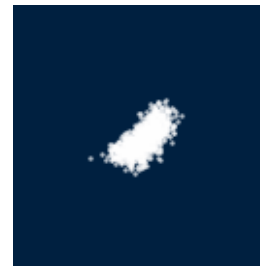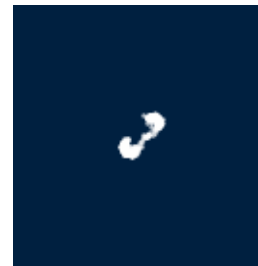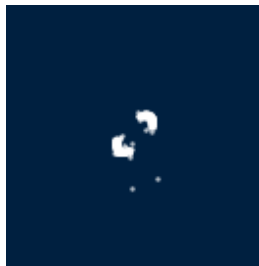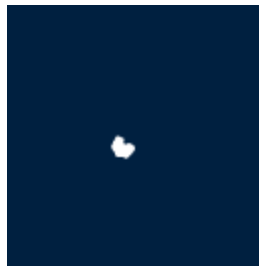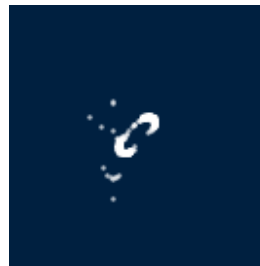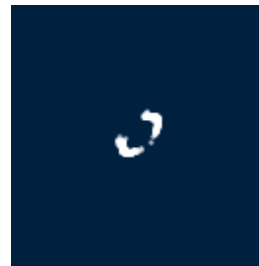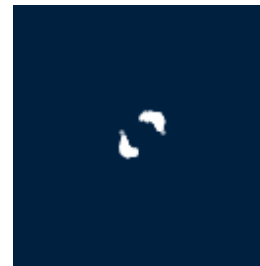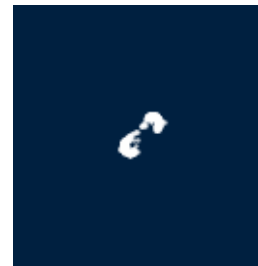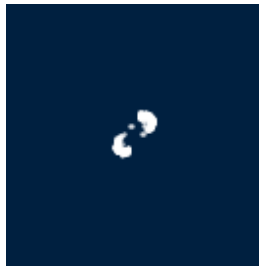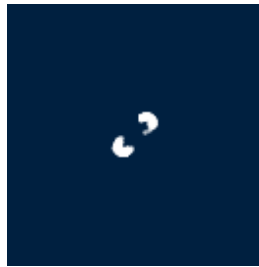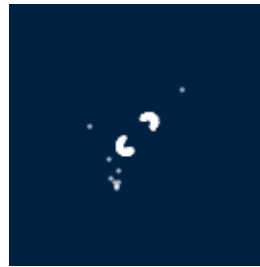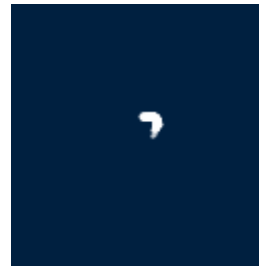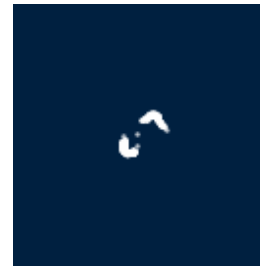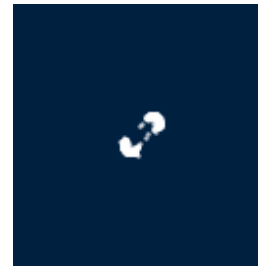

Supplement: supplementary_material [file attachment]

Surrogate

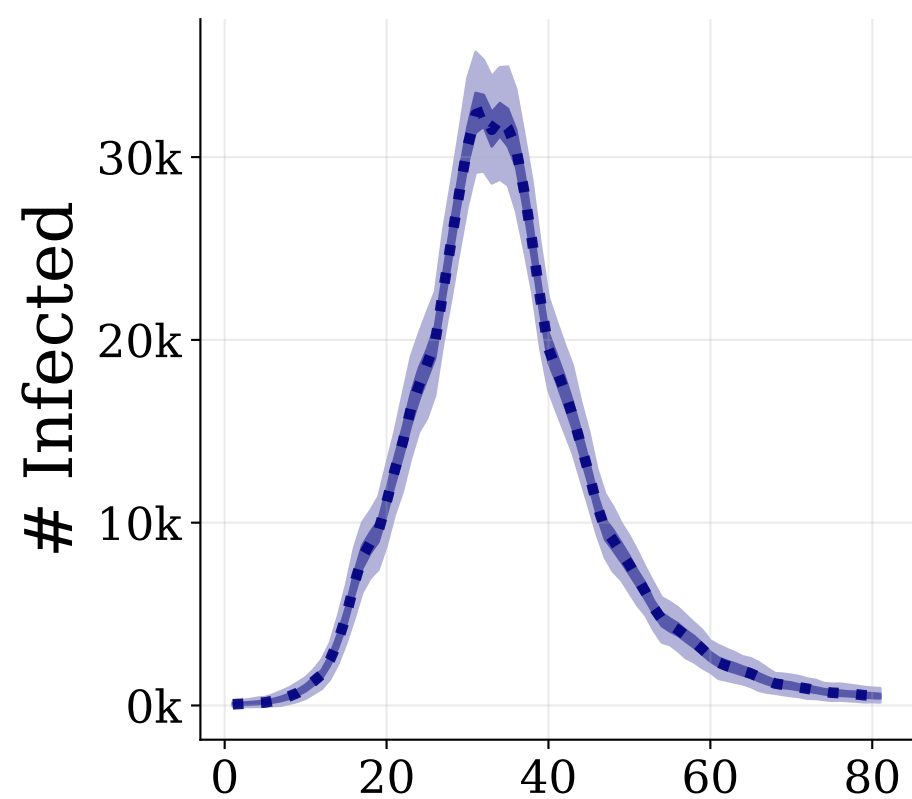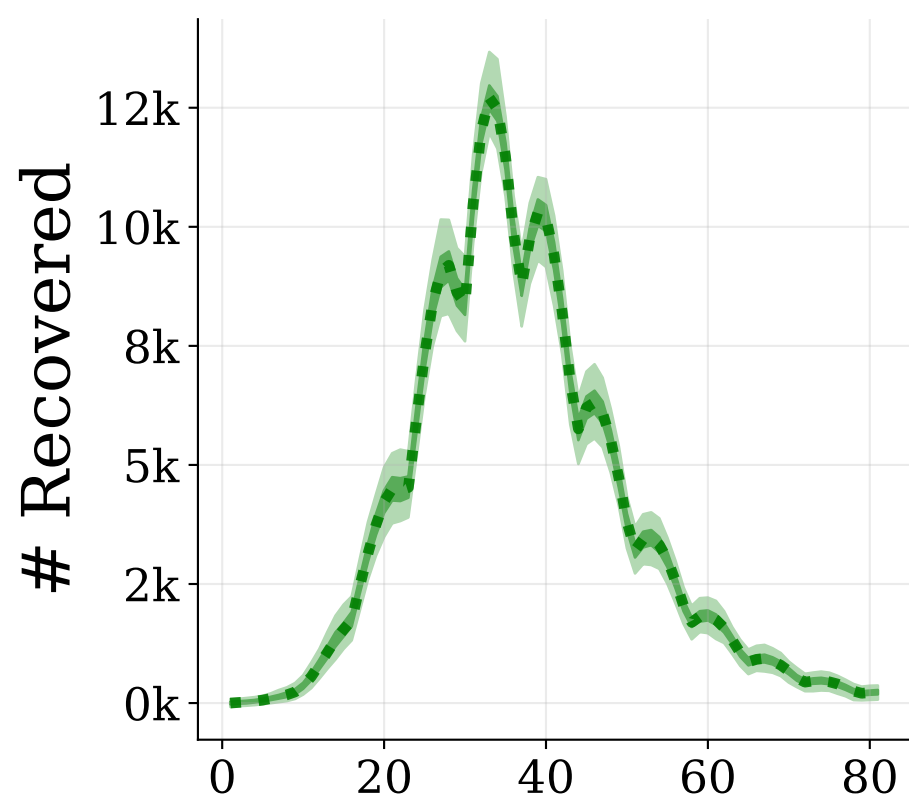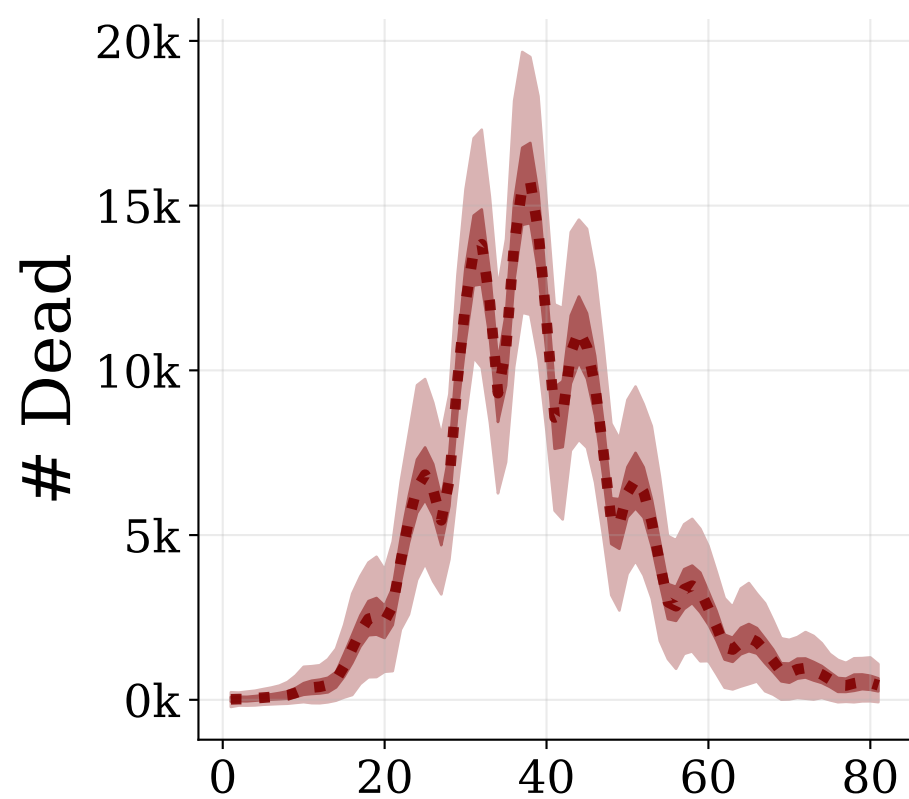

Simulator

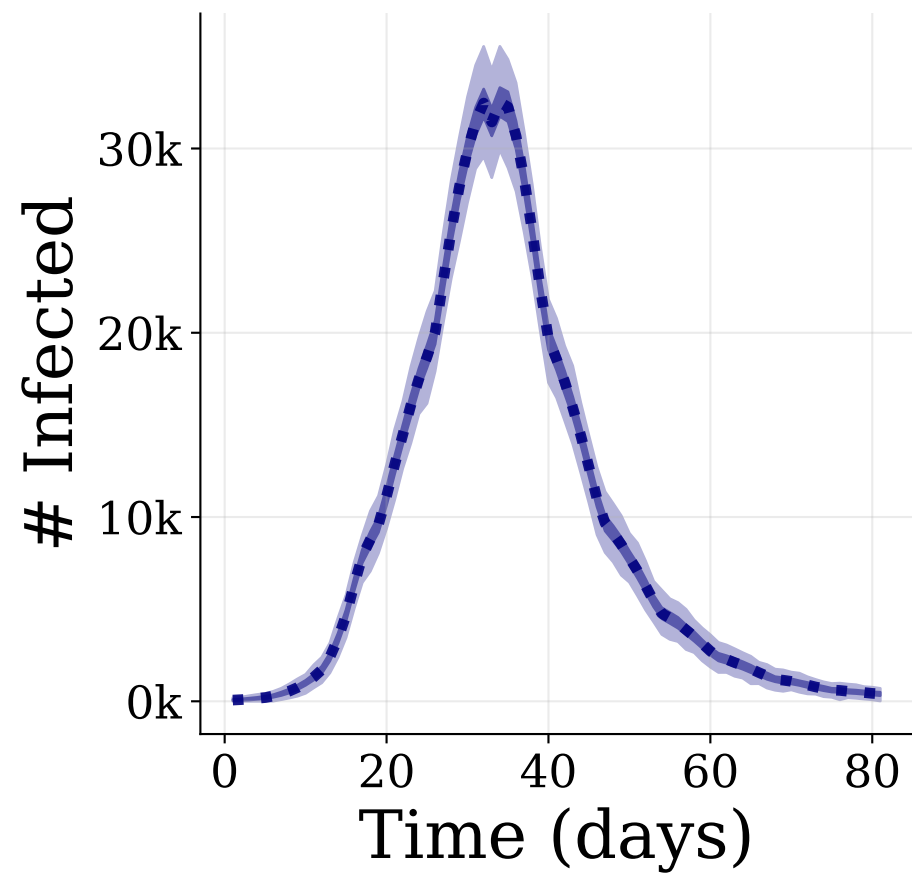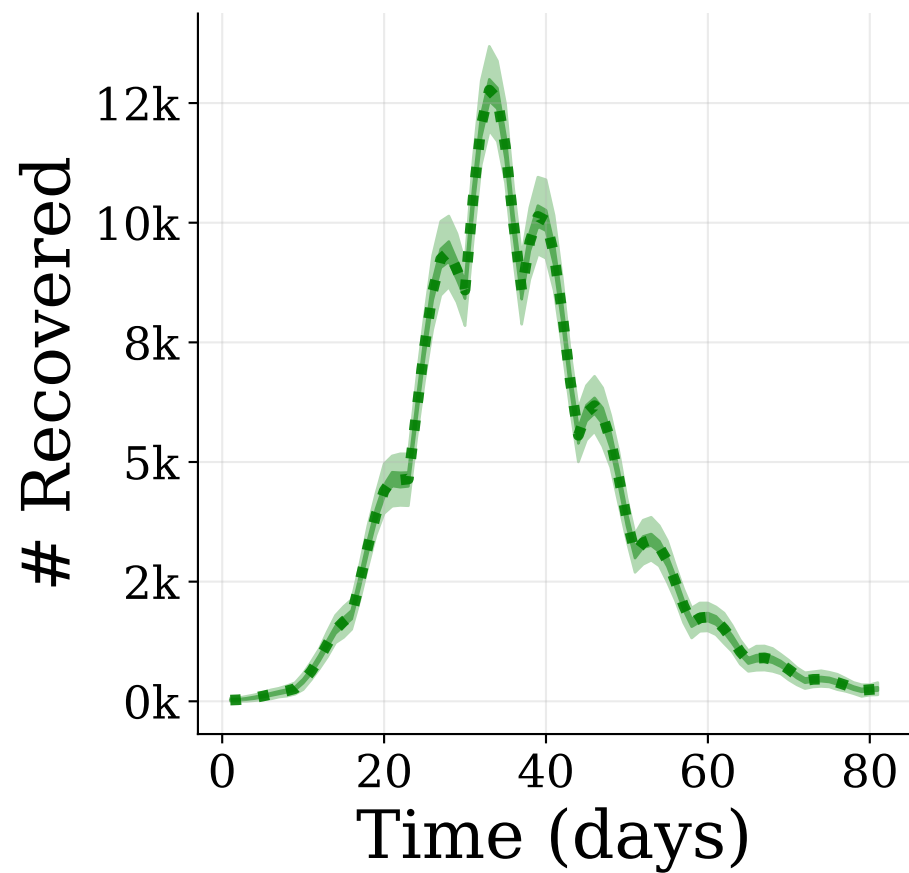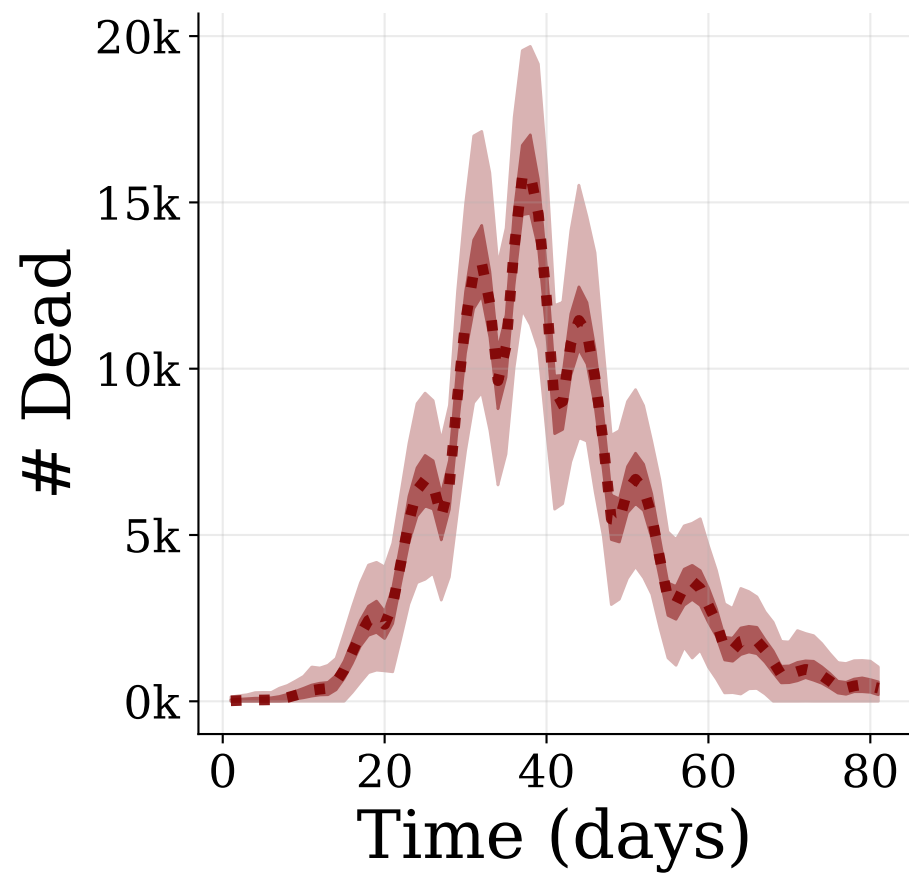

Supplement: supplementary_material [file attachment]

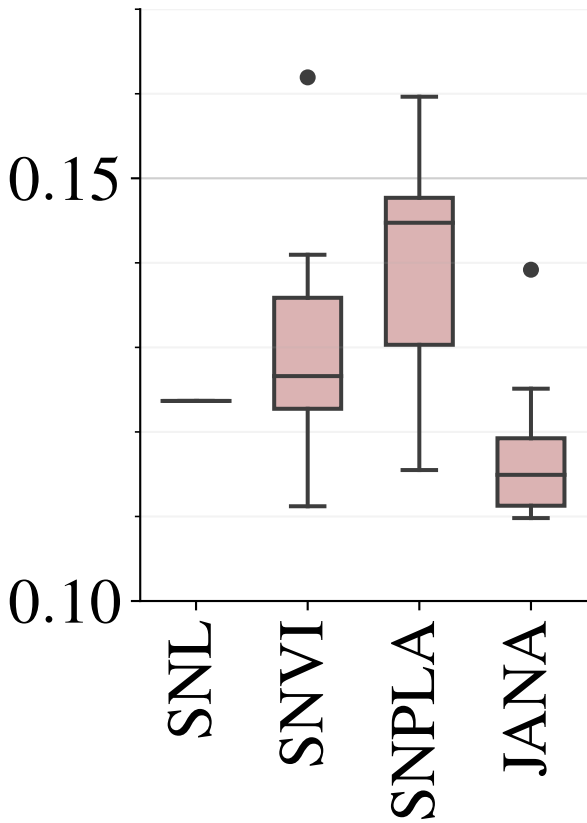

Supplement: supplementary_material [file attachment]

ECDF difference

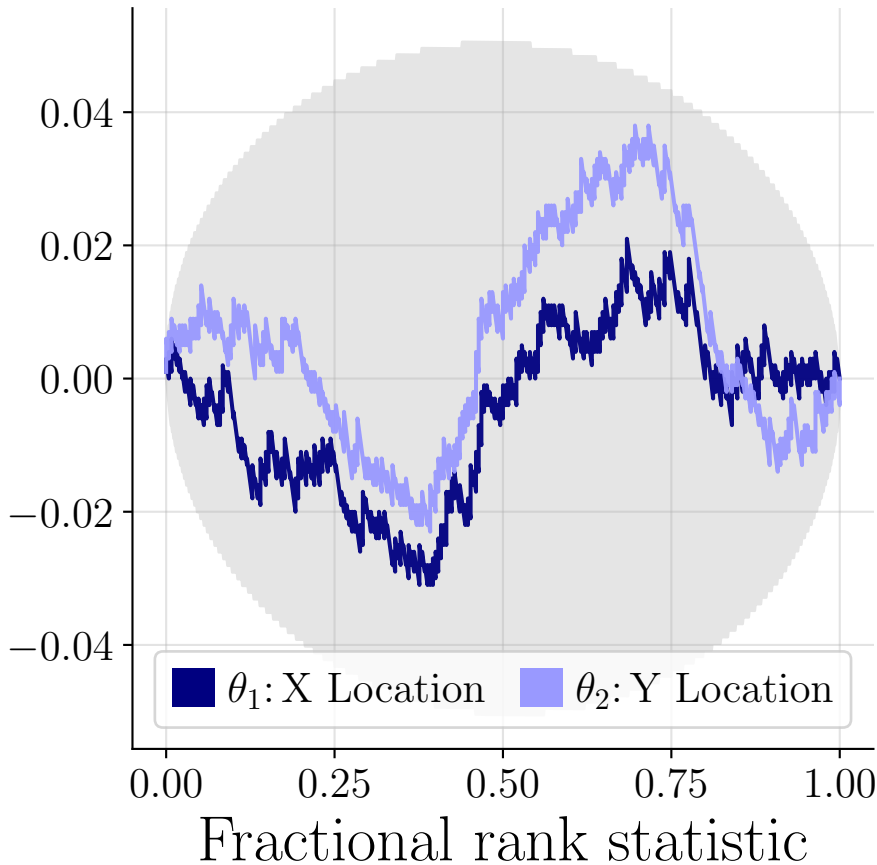

Supplement: supplementary_material [file attachment]

Post.Loss

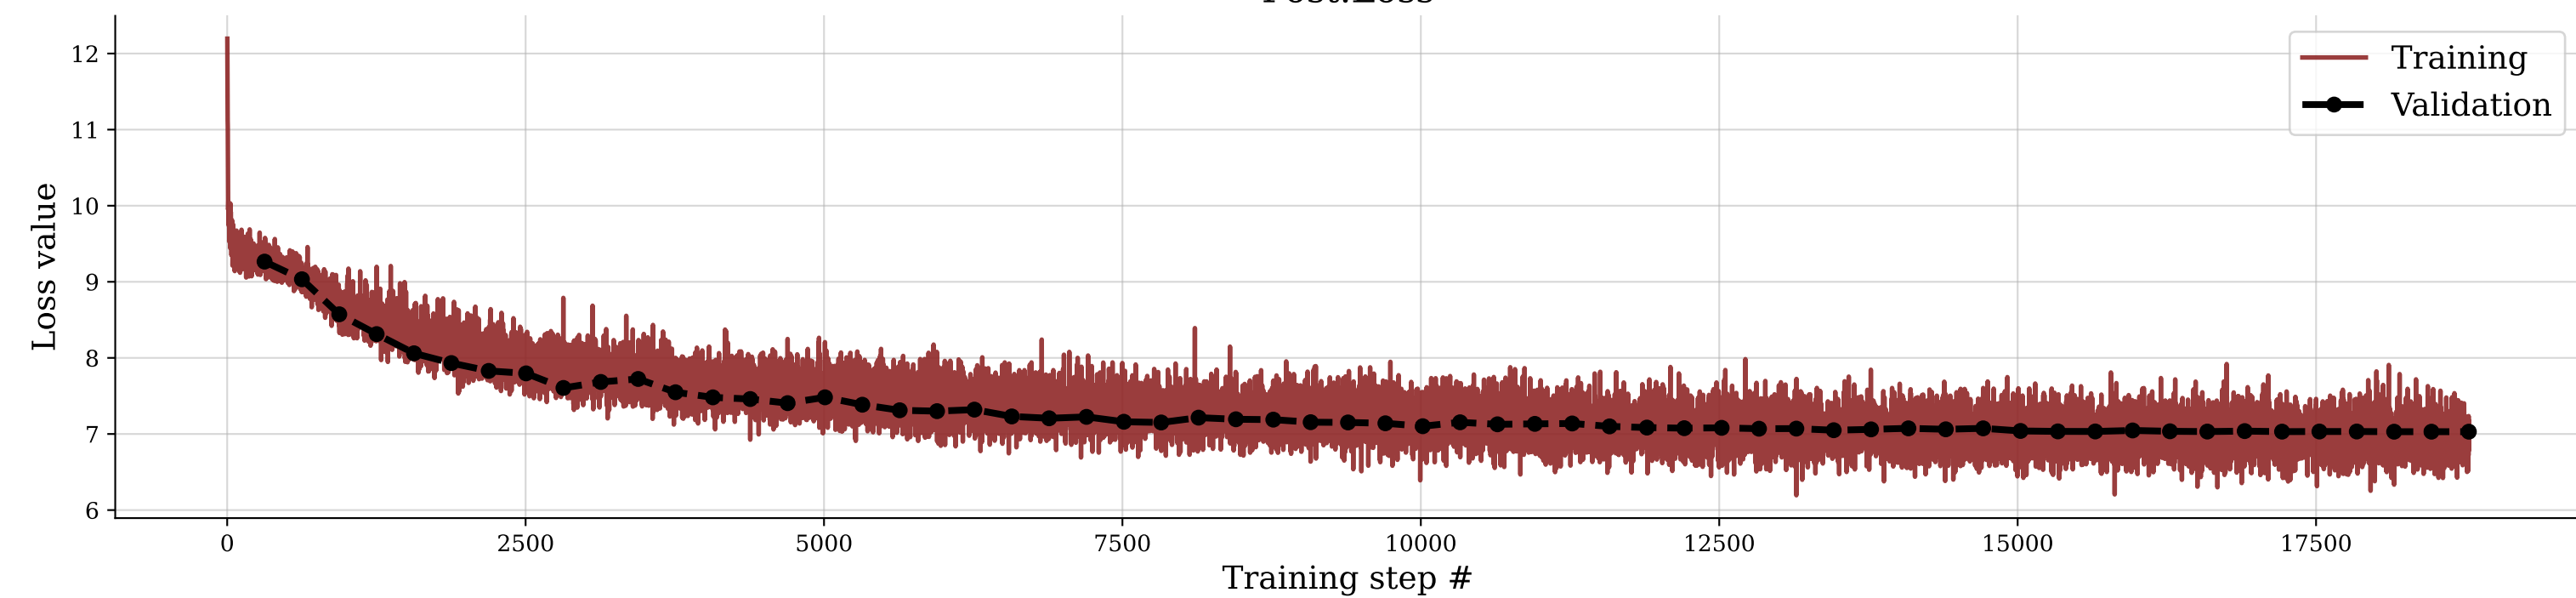

Lik.Loss

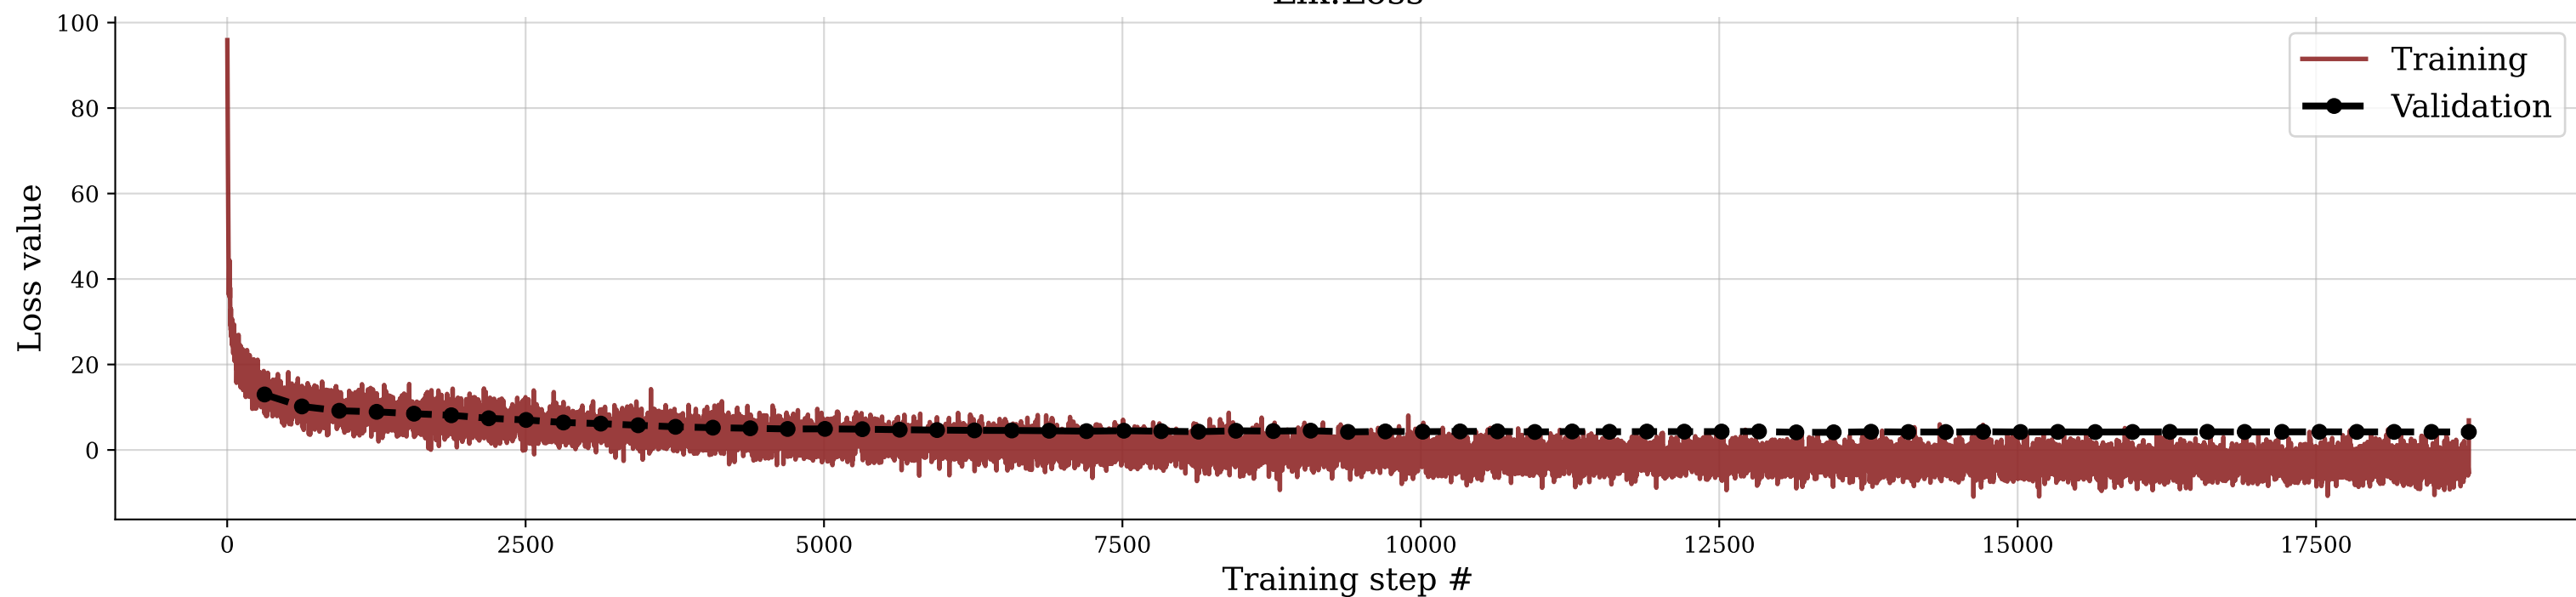

W.Decay

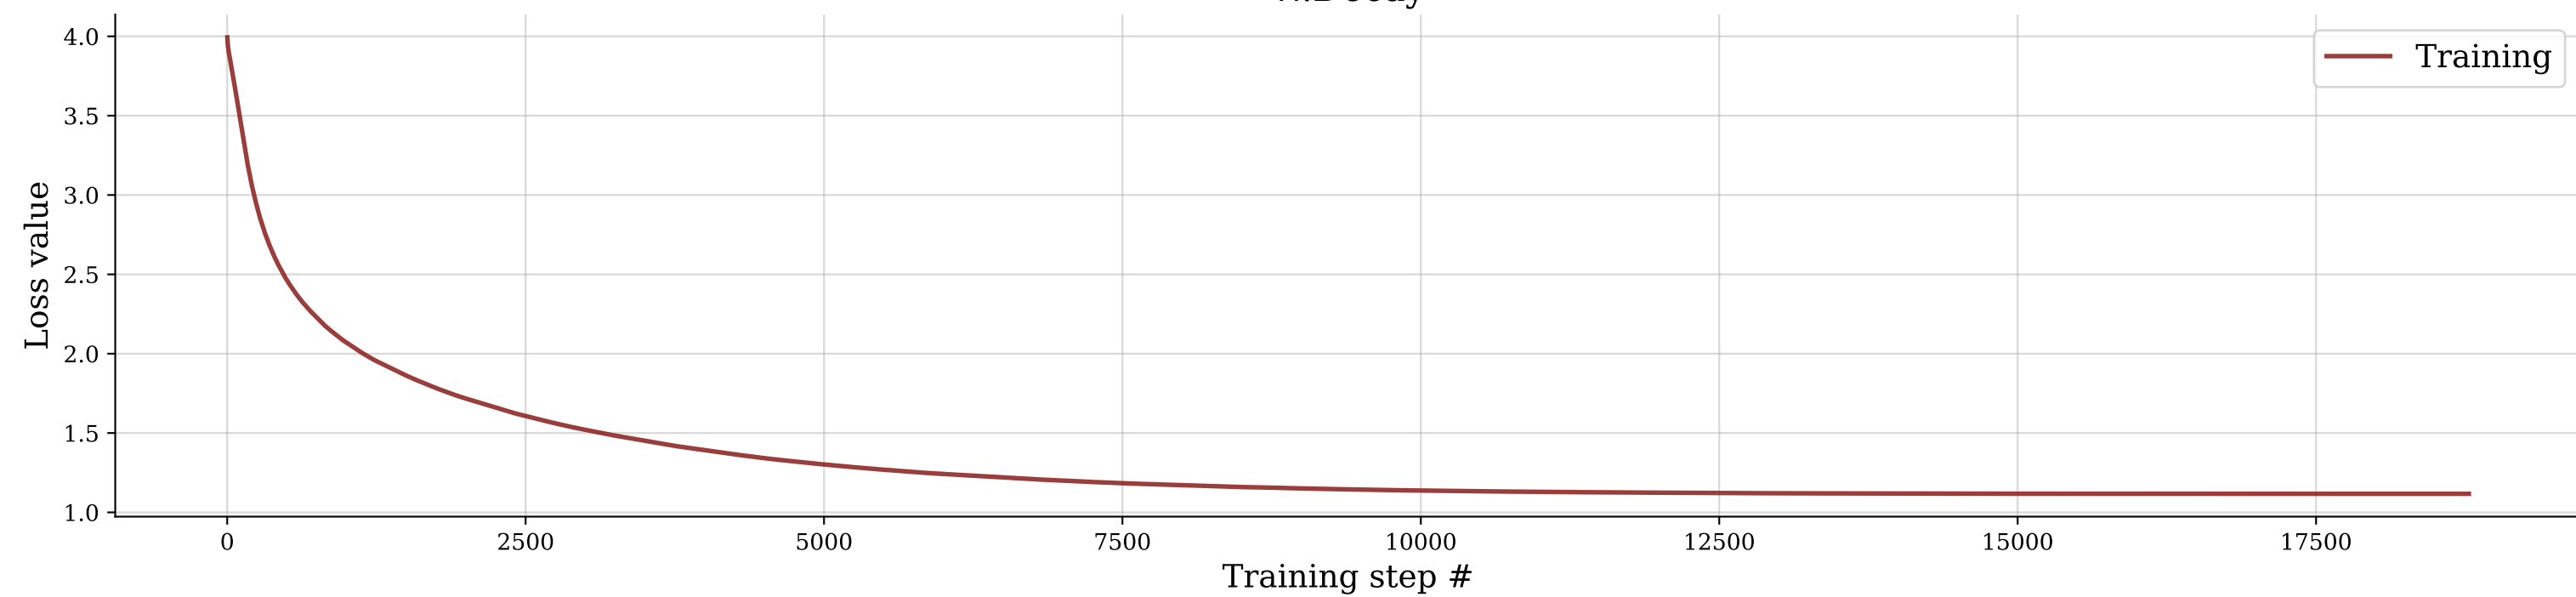

Supplement: supplementary_material [file attachment]

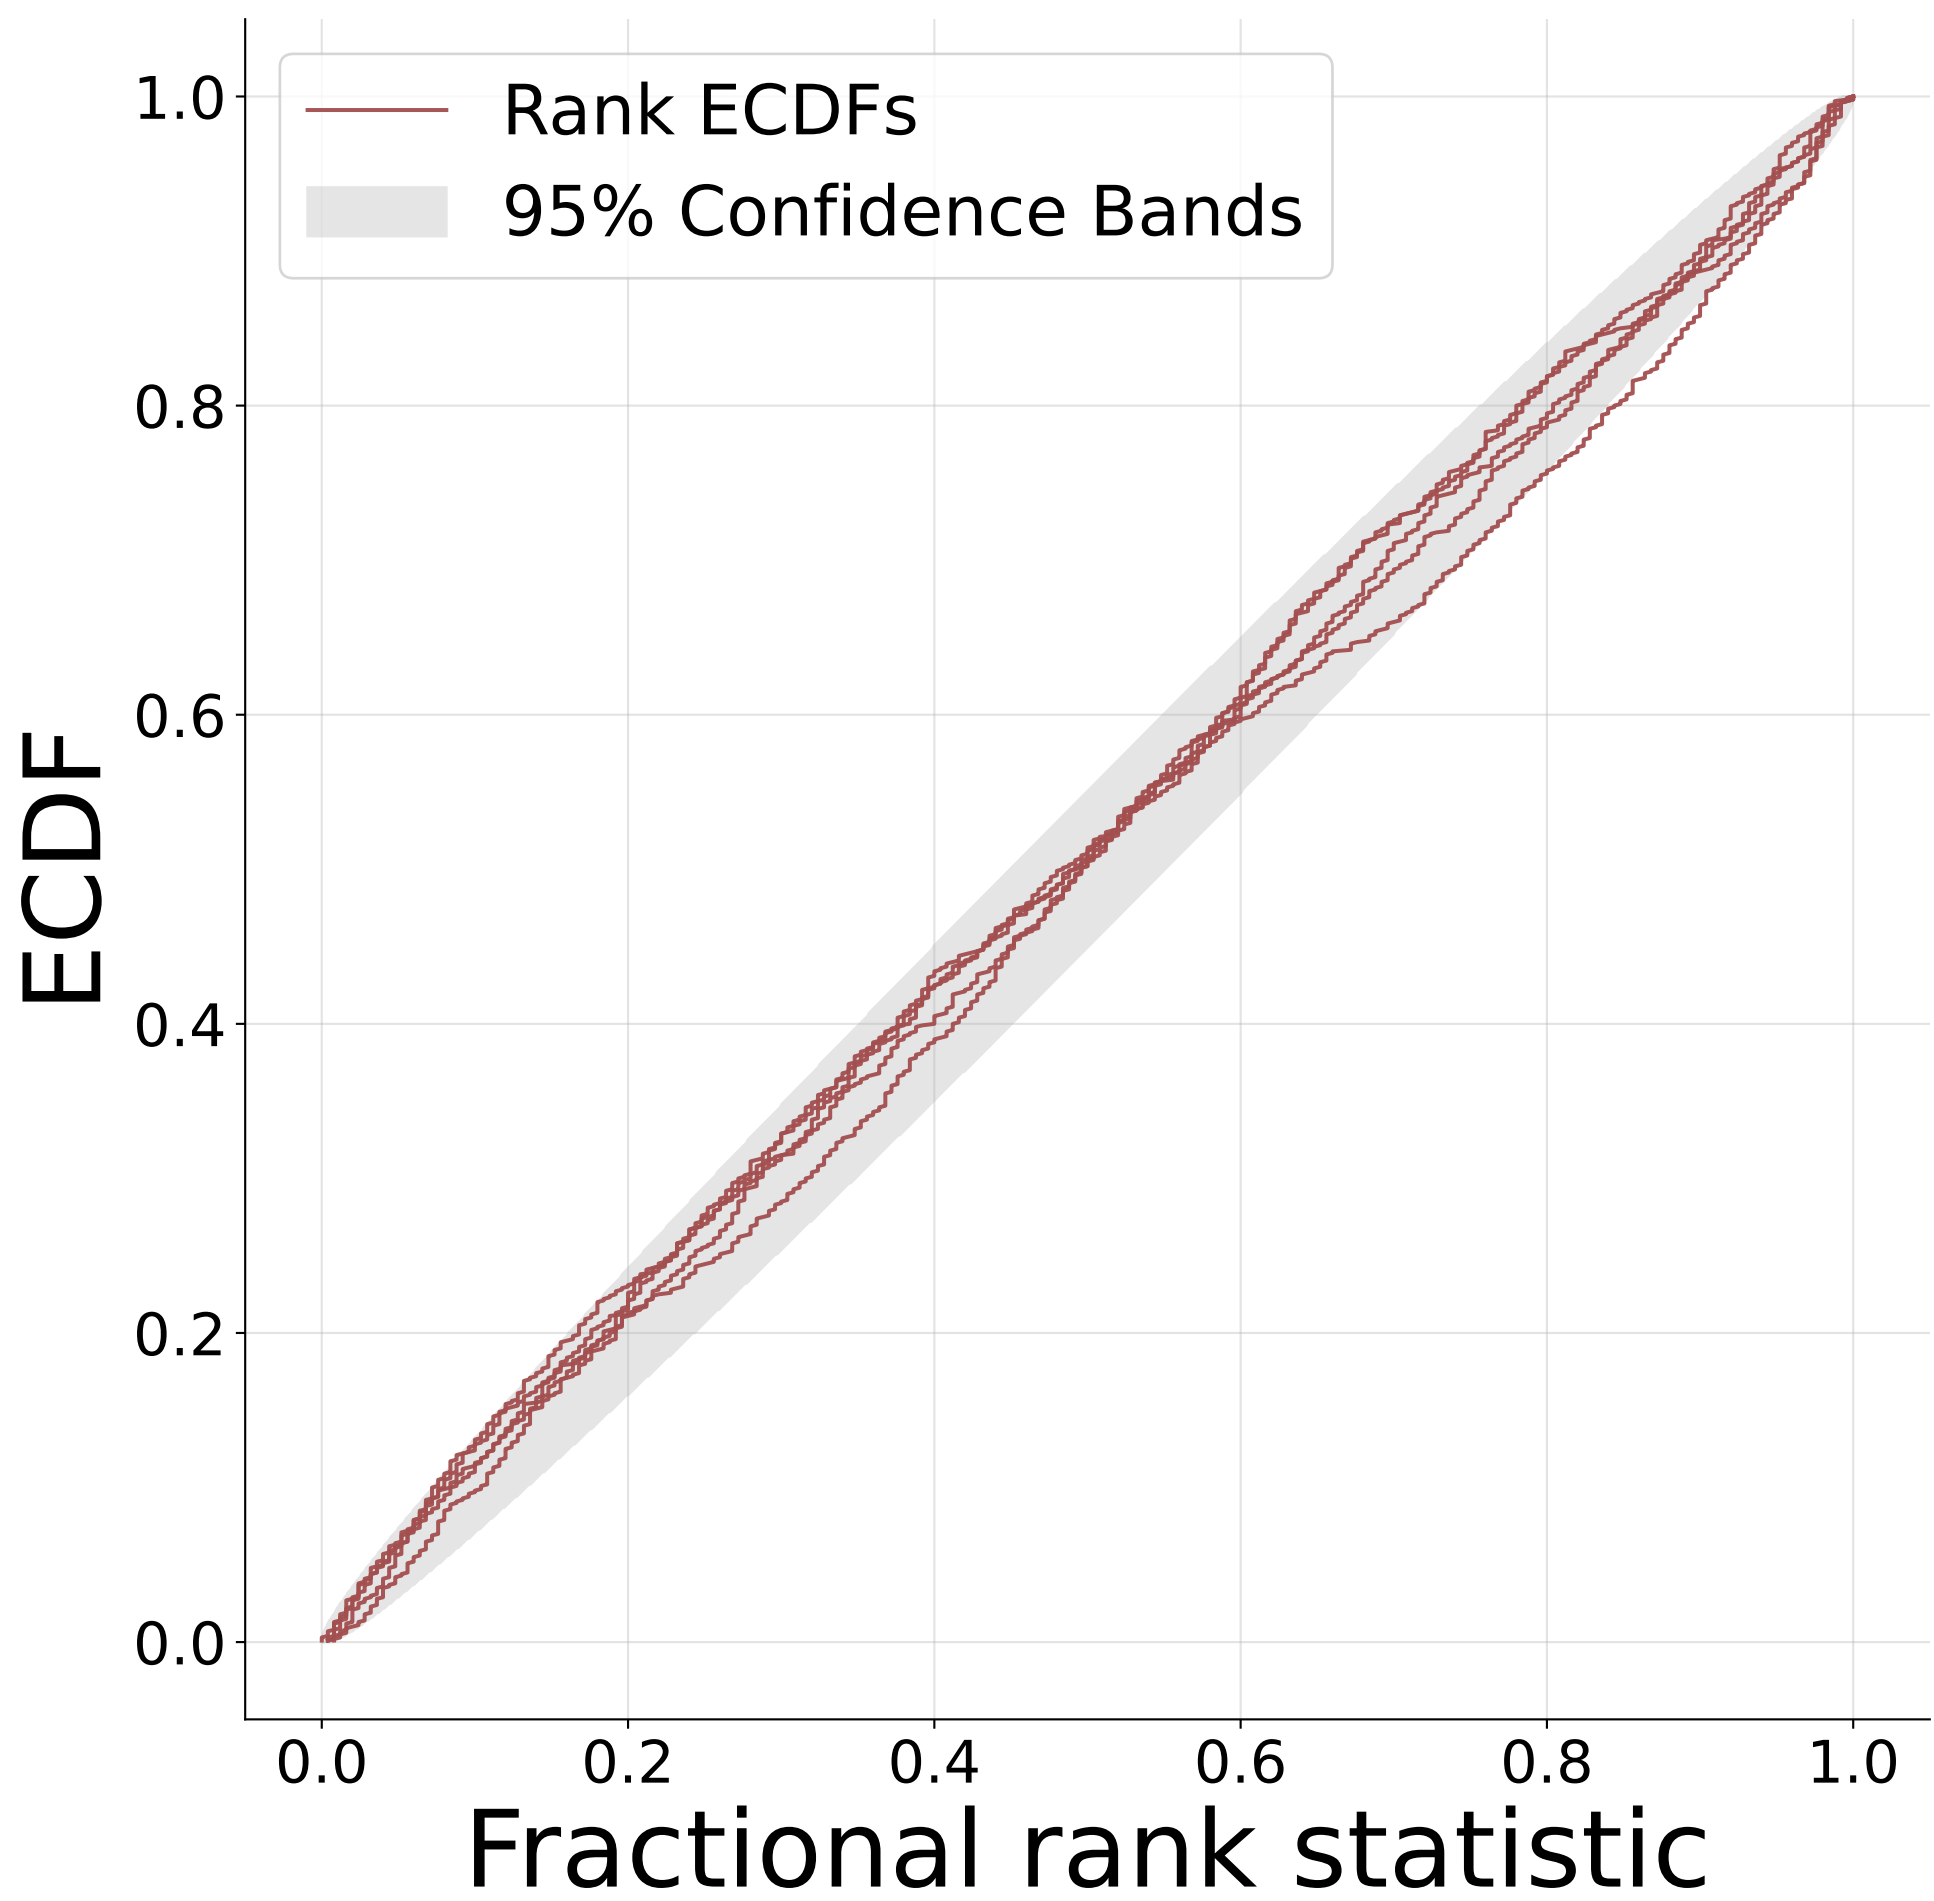

Supplement: supplementary_material [file attachment]

ECDF difference

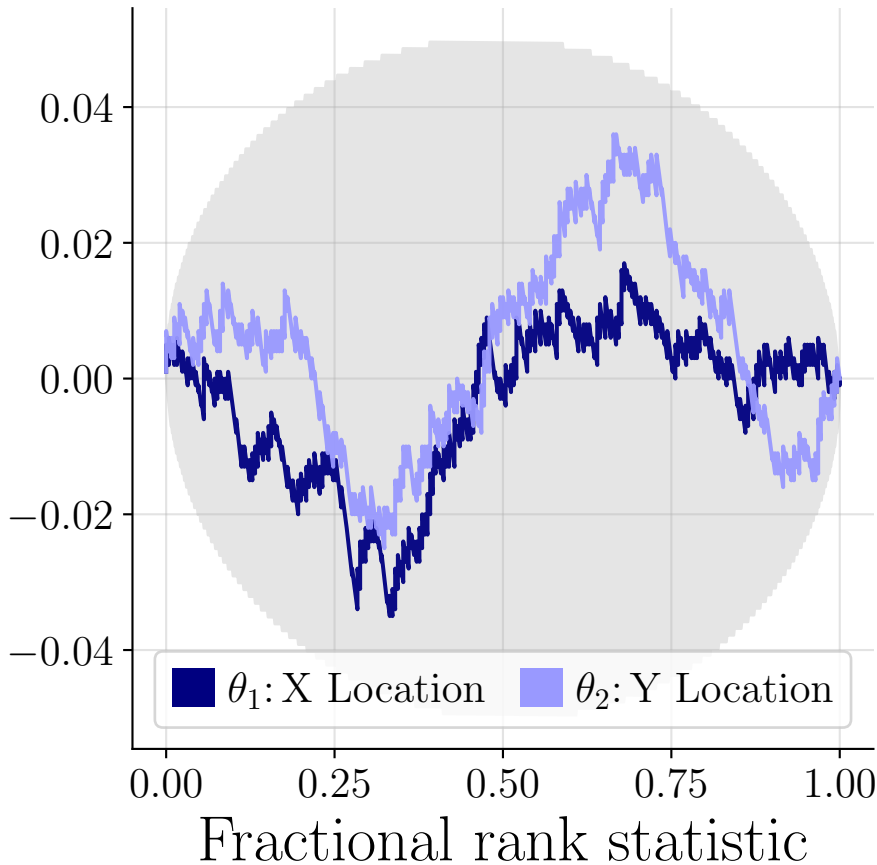

Supplement: supplementary_material [file attachment]

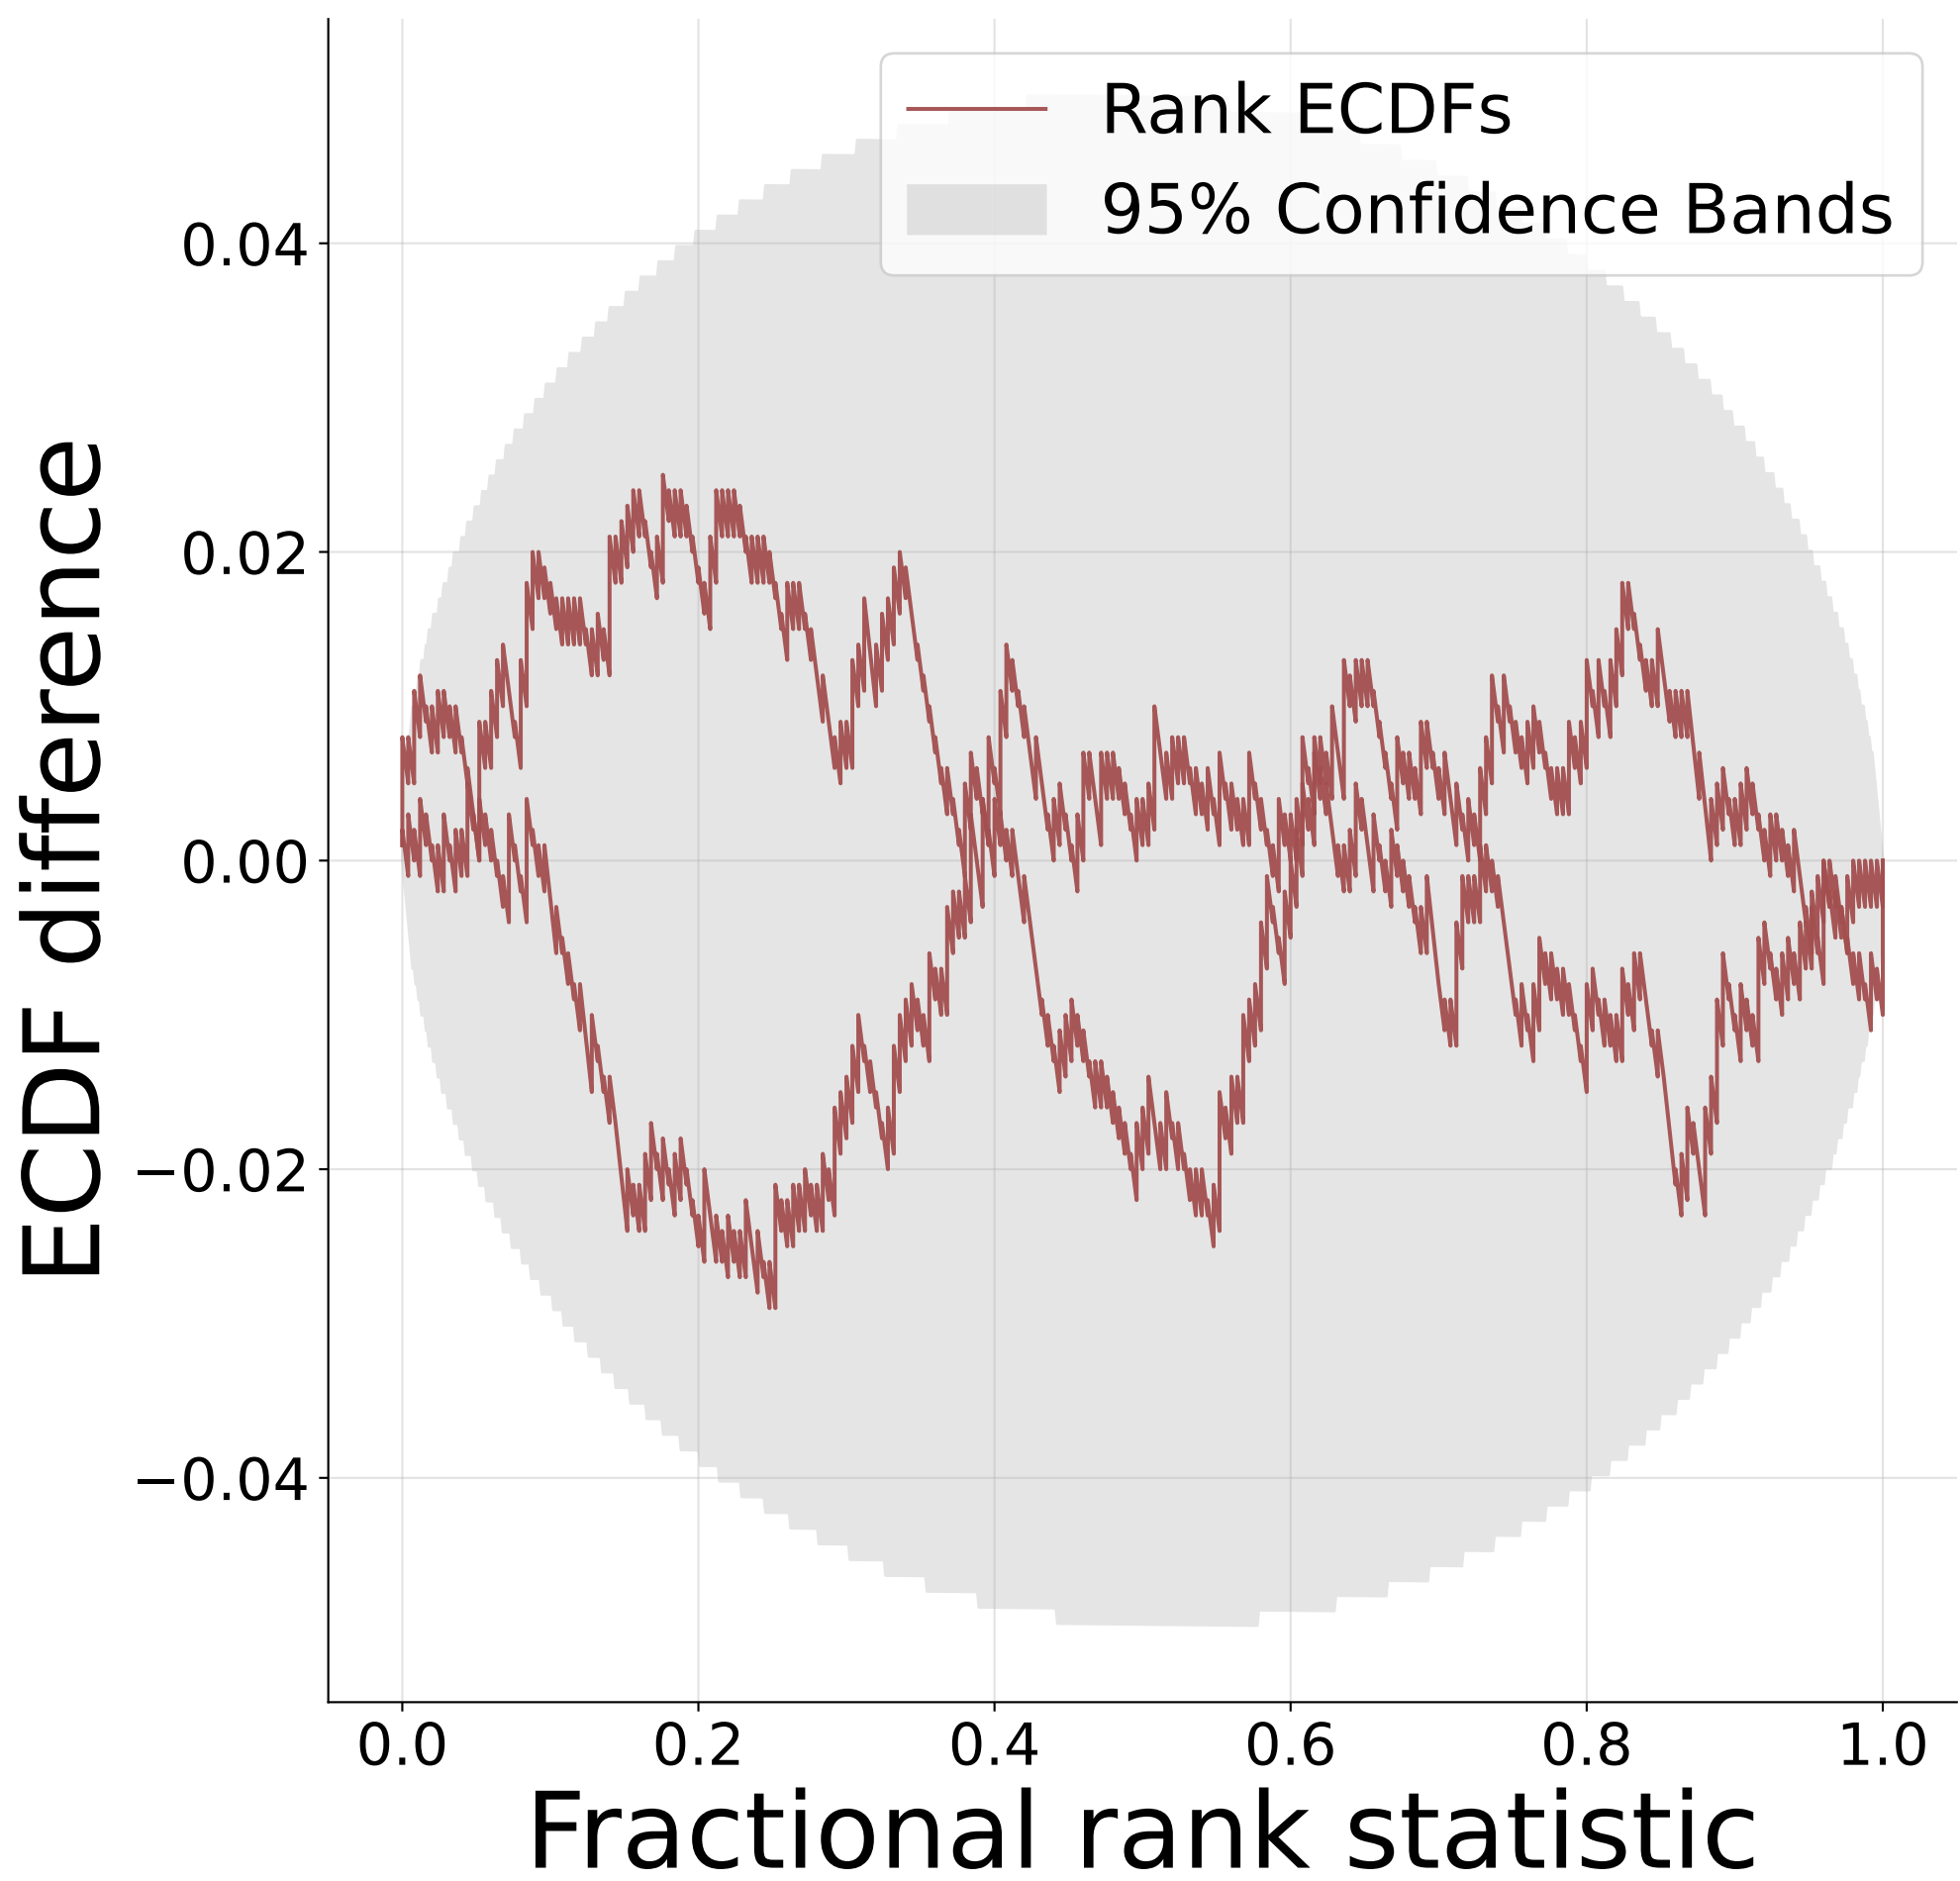

Supplement: supplementary_material [file attachment]

Post.Loss

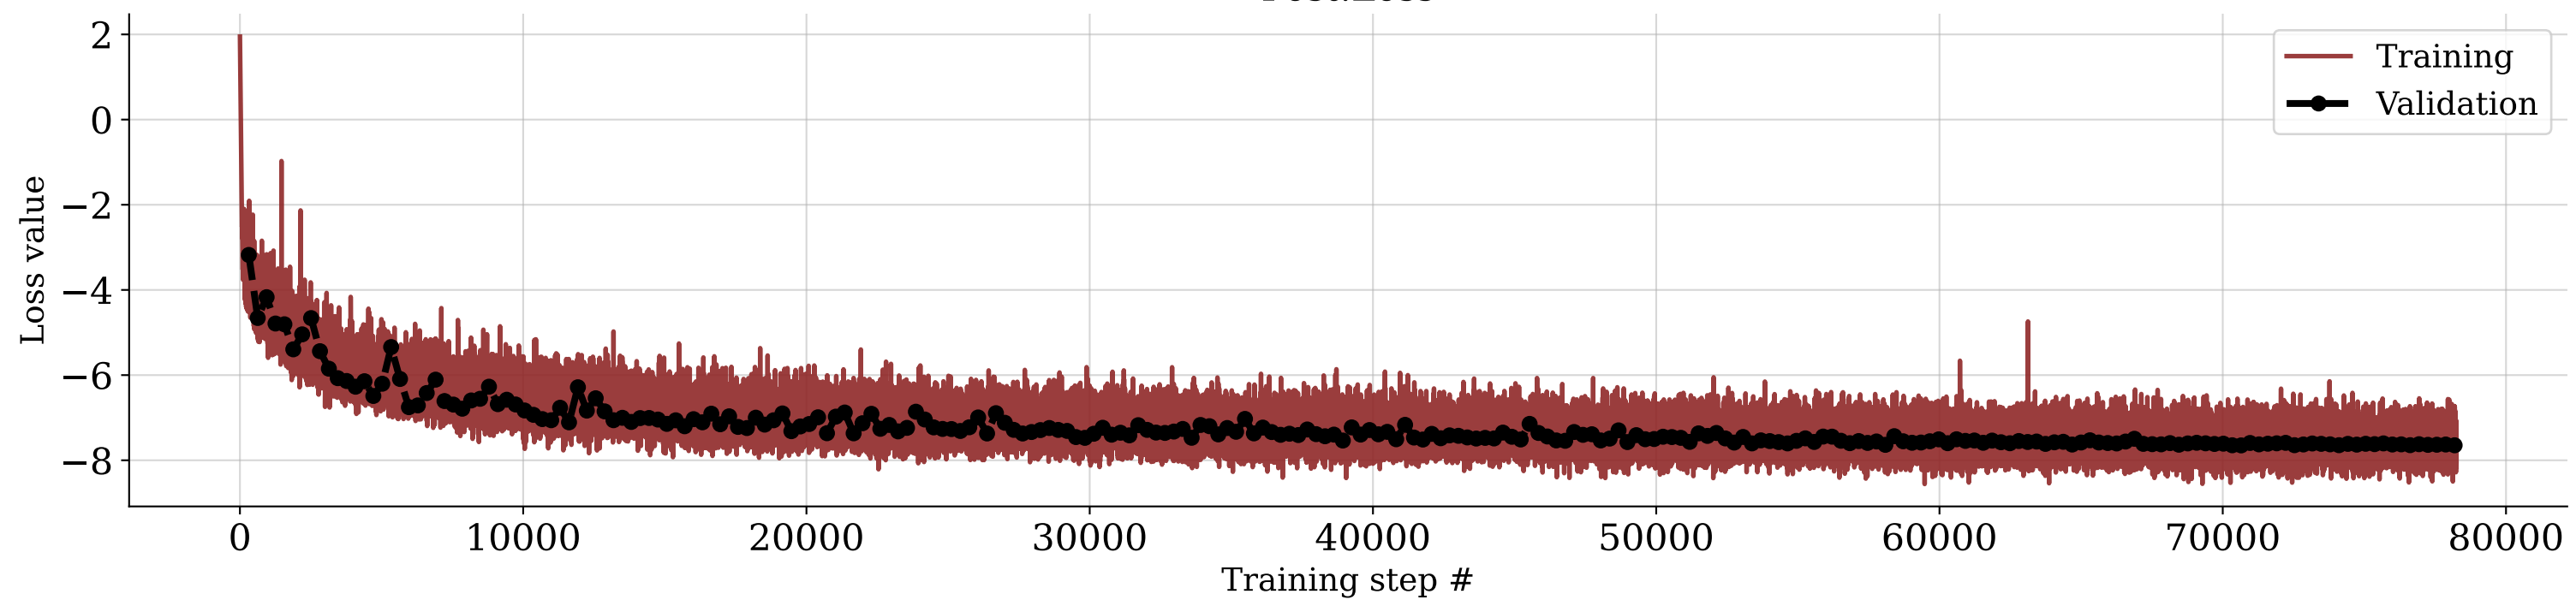

Lik.Loss

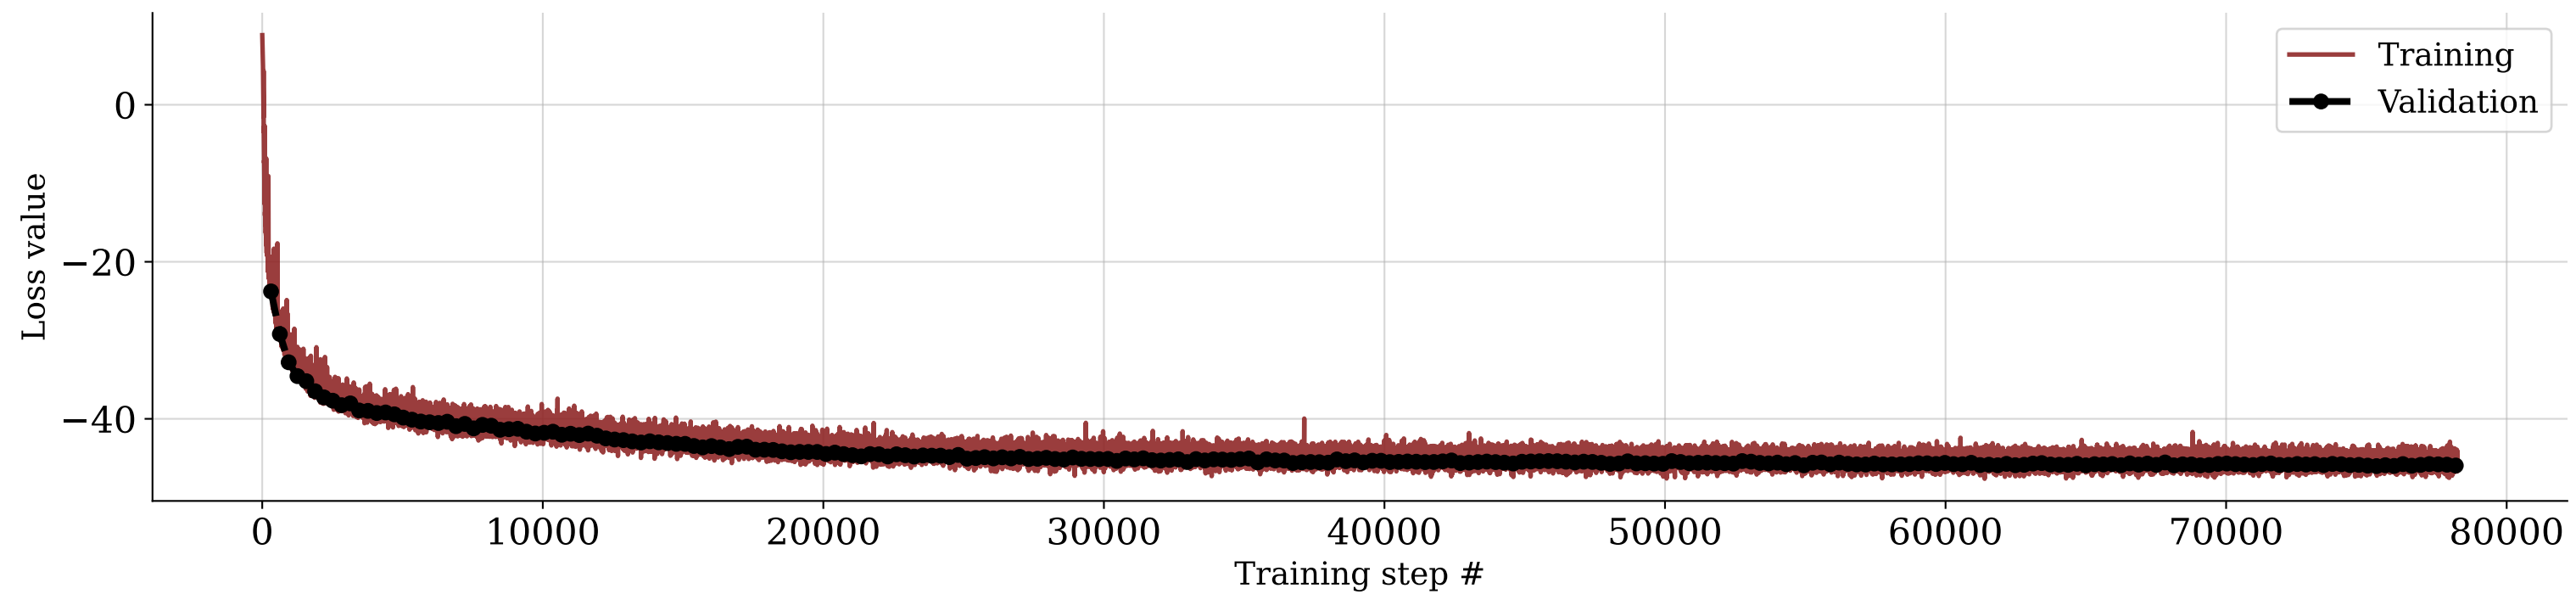

W.Decay

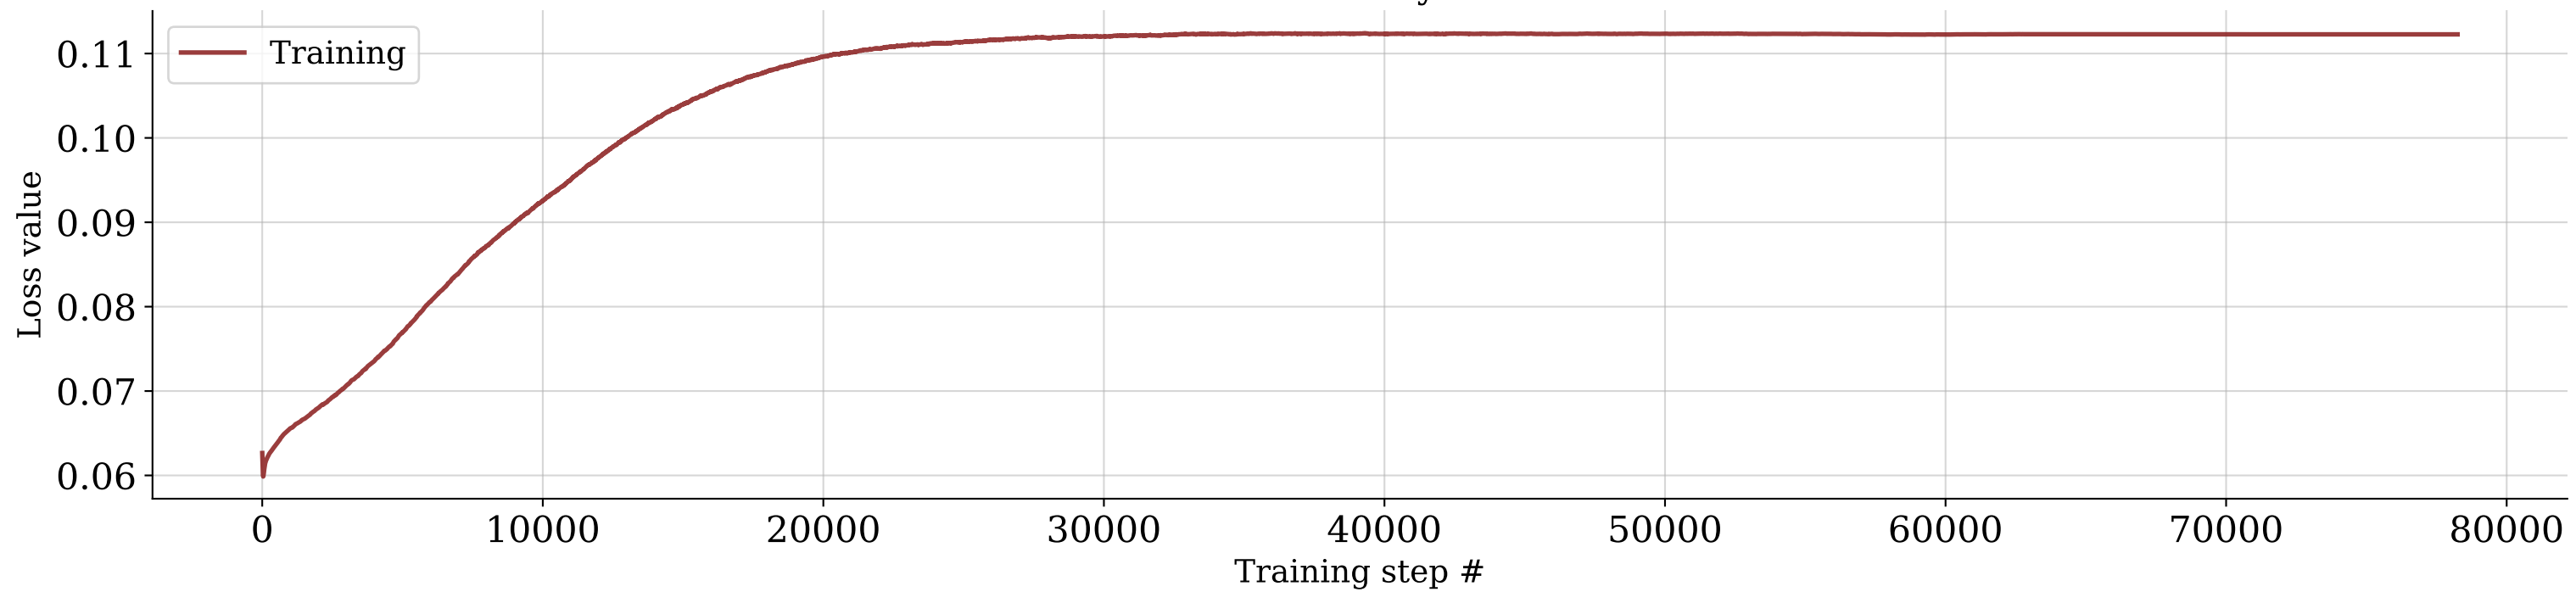

Supplement: supplementary_material [file attachment]

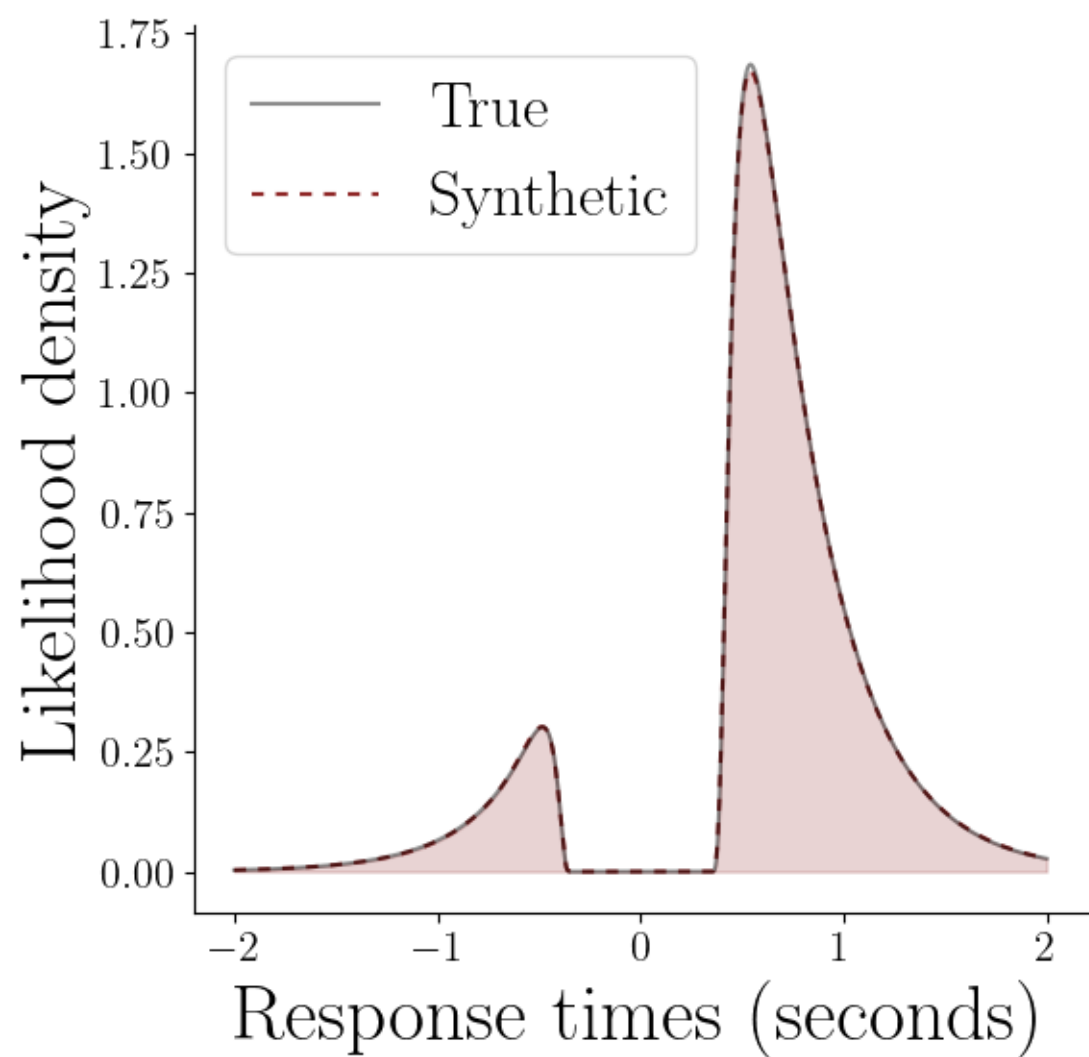

Supplement: supplementary_material [file attachment]

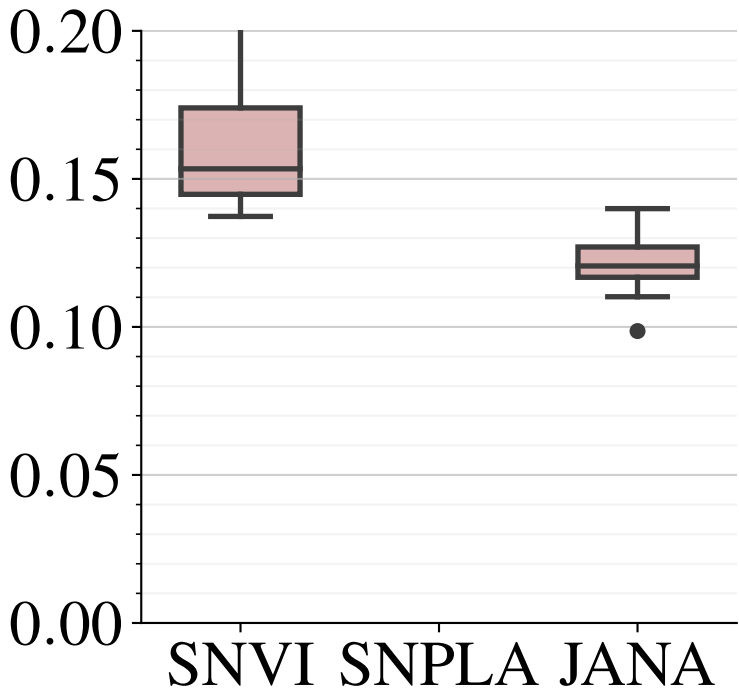

Supplement: supplementary_material [file attachment]

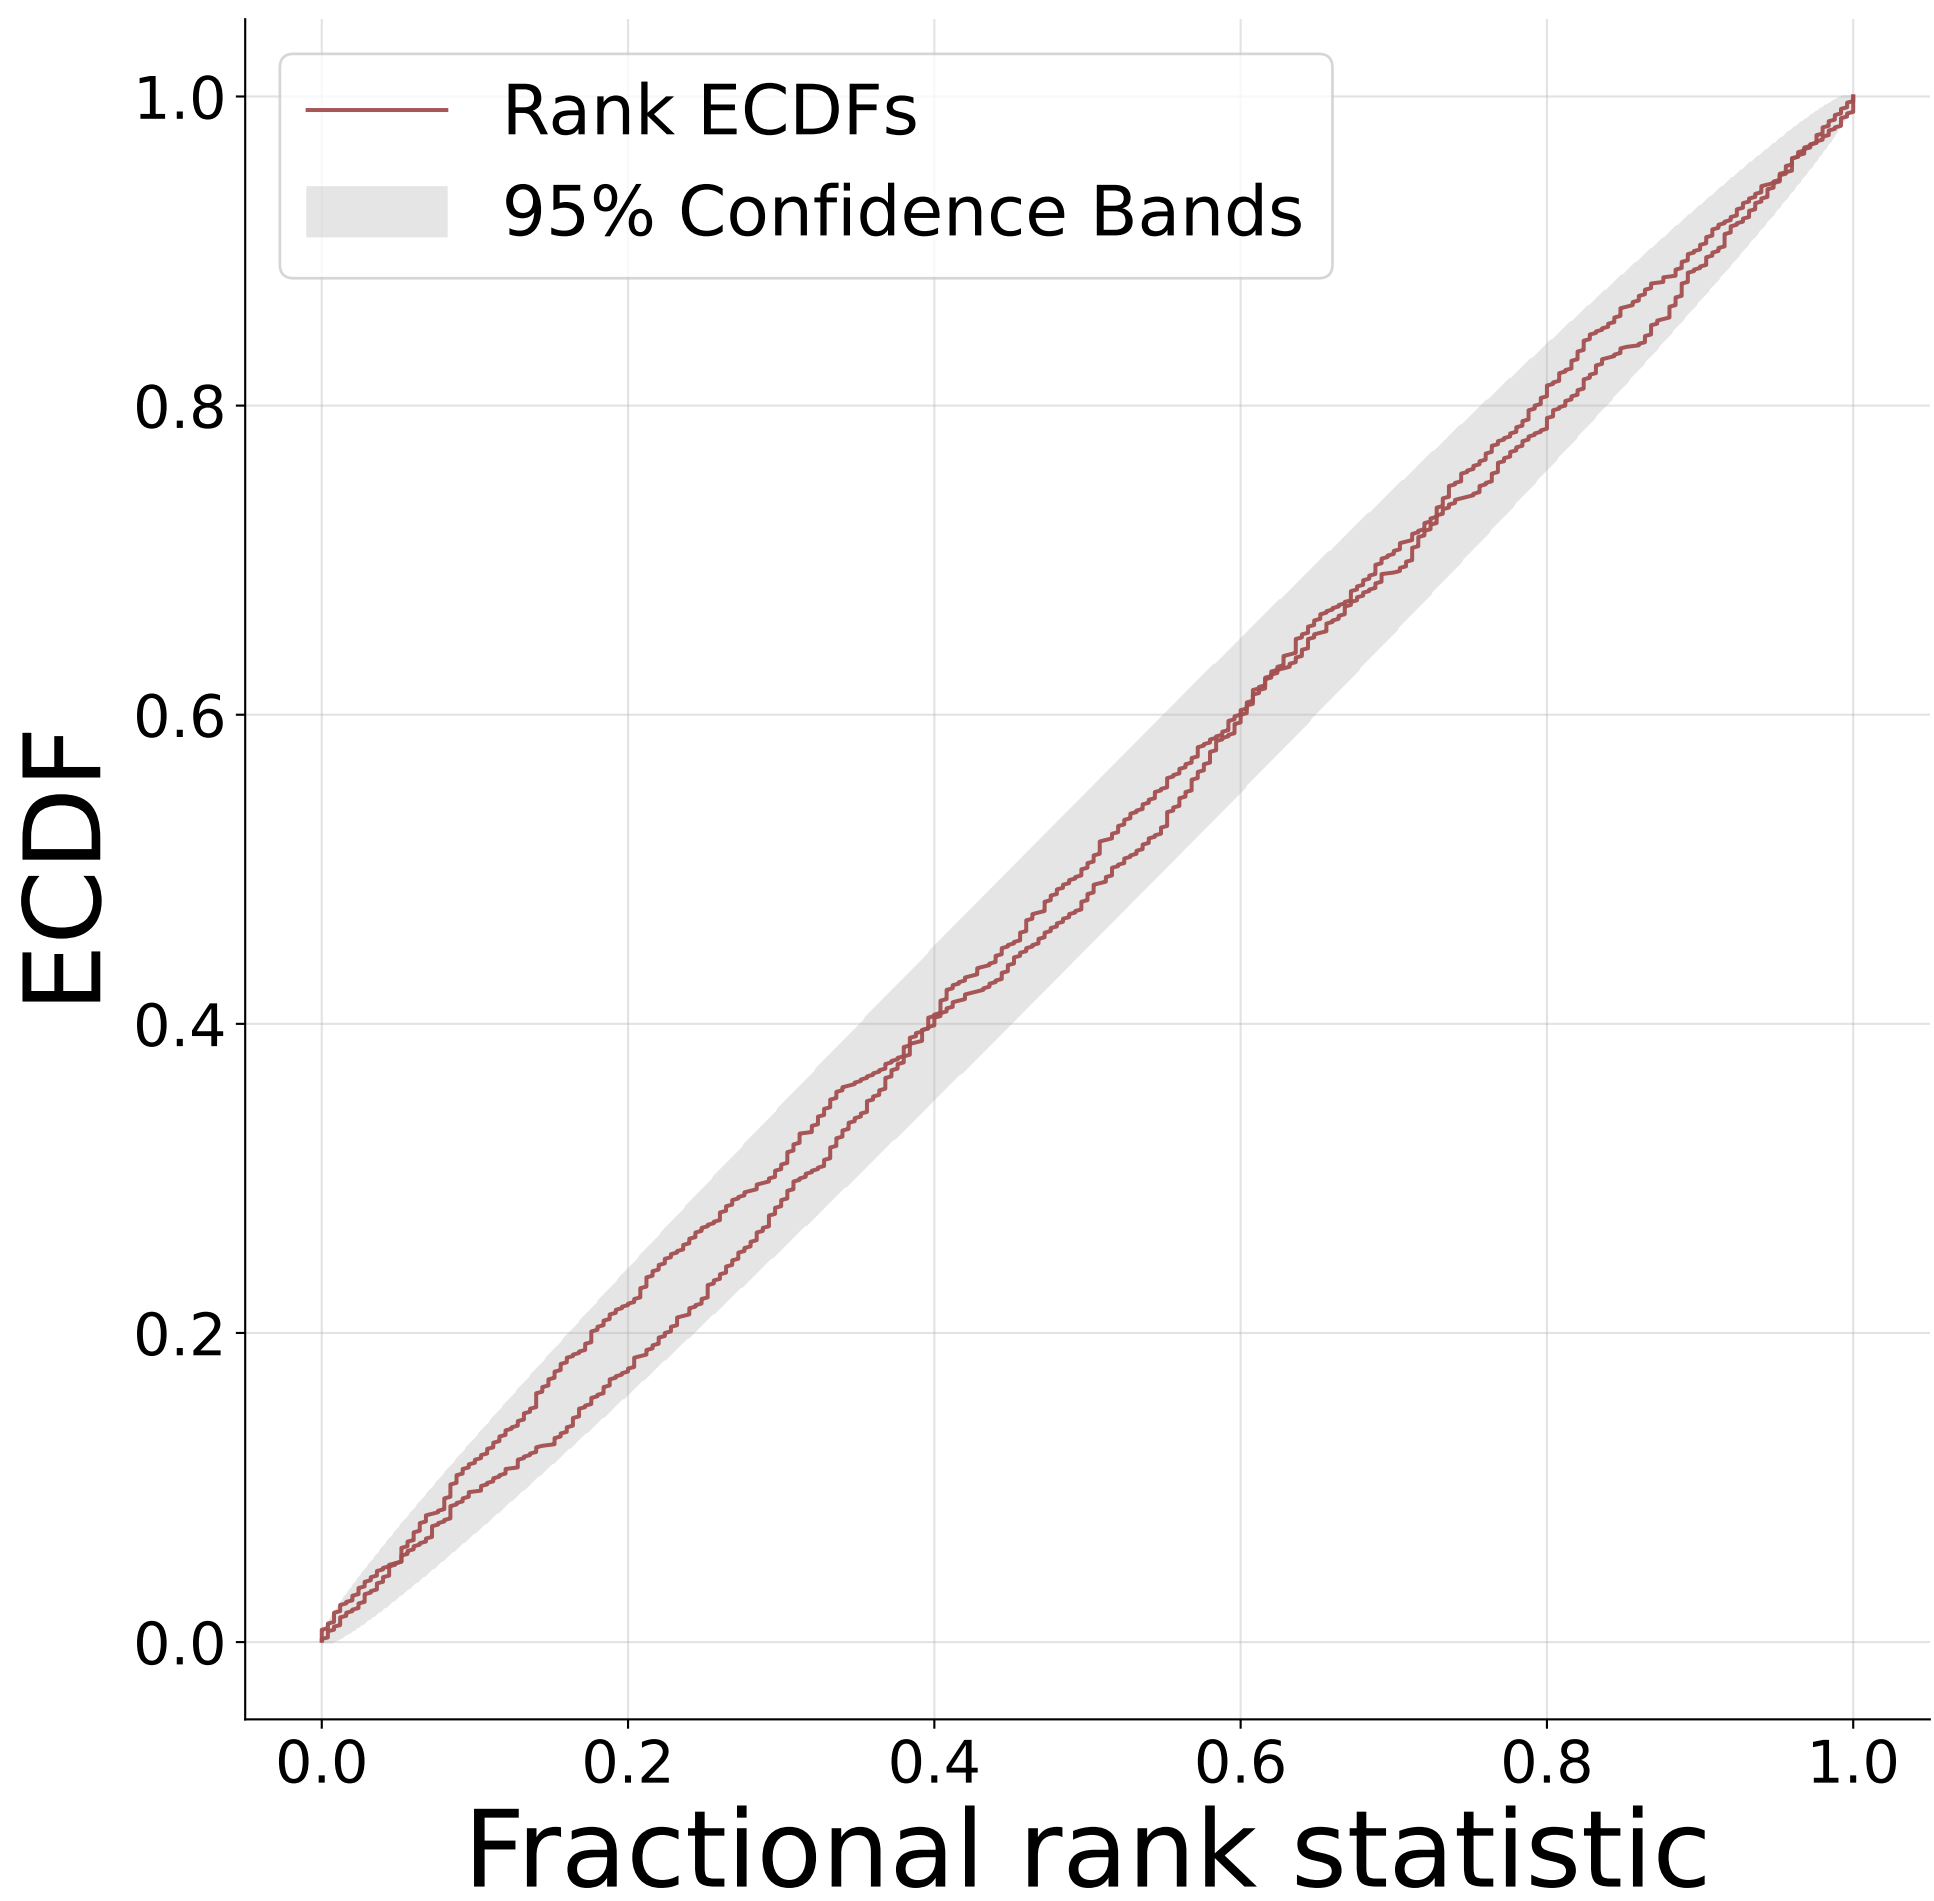

Supplement: supplementary_material [file attachment]

ECDF difference

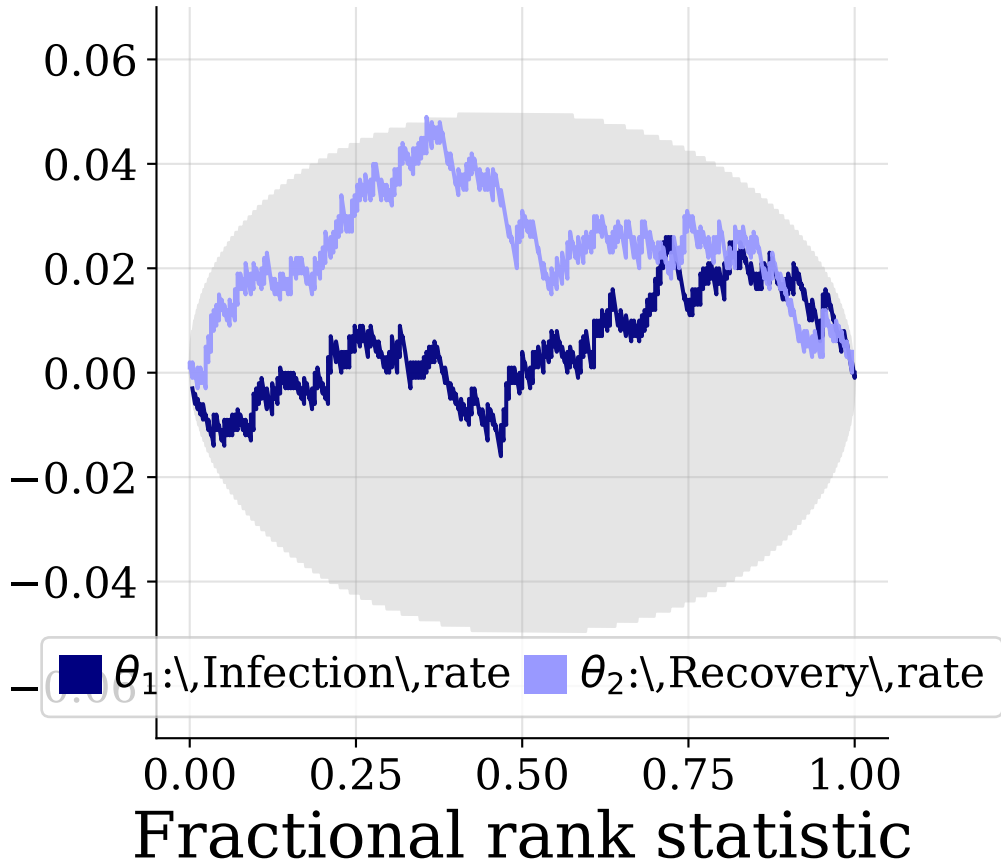

Supplement: supplementary_material [file attachment]

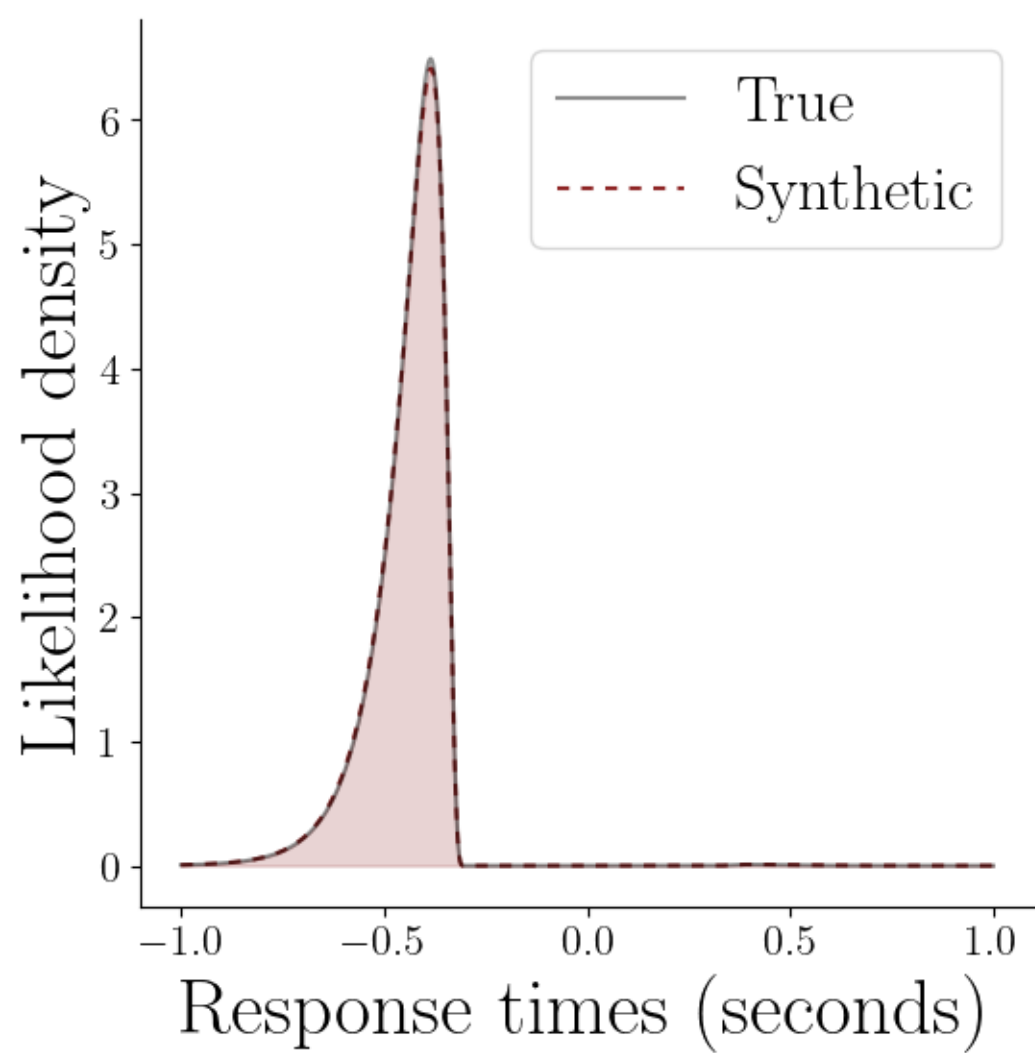

Supplement: supplementary_material [file attachment]

True

NPE-C

SNRE-B

SNPE-C

SNVI

SNPLA

JANA

 $N = 2000$  $N = 6000$  $N = 10000$ 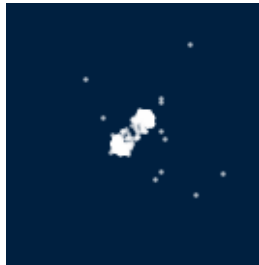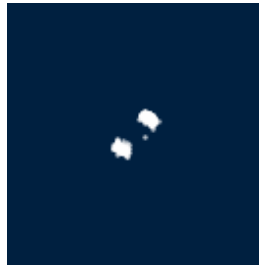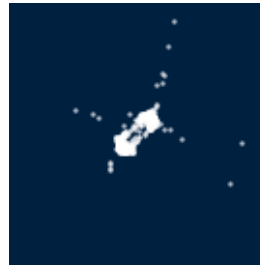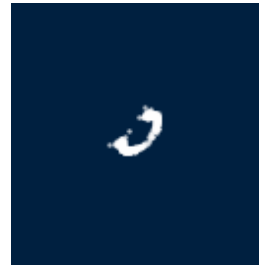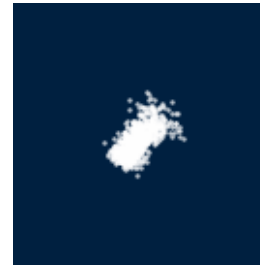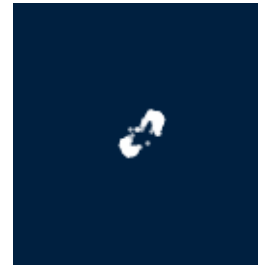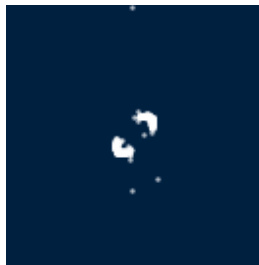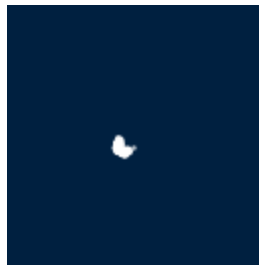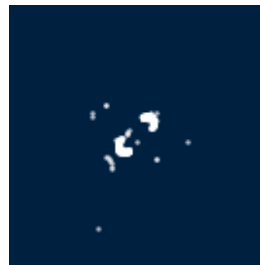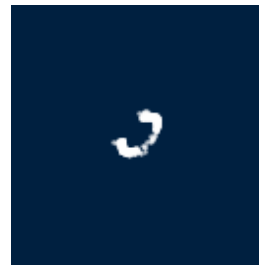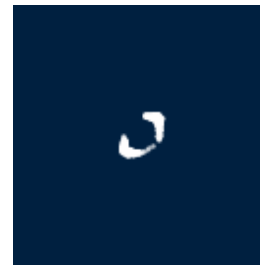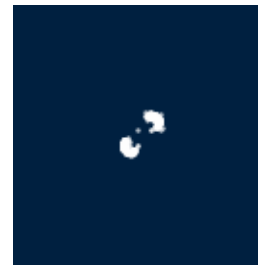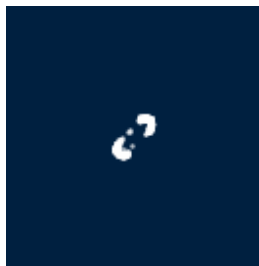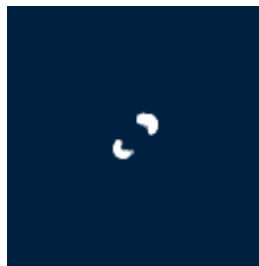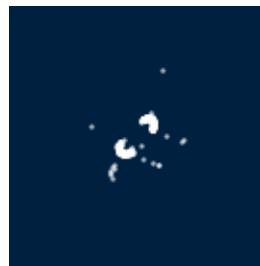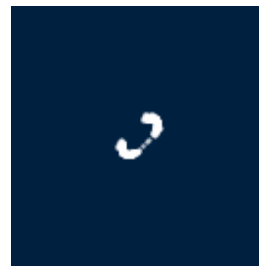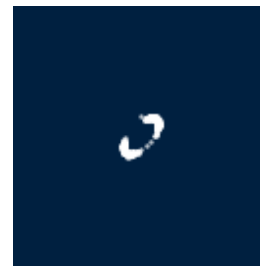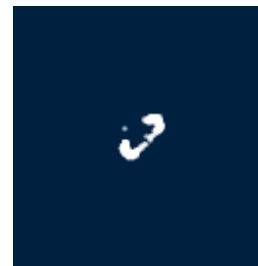

Supplement: supplementary_material [file attachment]
